# Supplementary material for: Modest increase in the de novo single-nucleotide mutation rate in house mice born by assisted reproduction
Source: HighWire-hosted journal article supplement (doi:10.1101/gr.281180.125), 2025-11-13
Supplement: Supplemental_Table_S2.xlsx [file Supplemental_Table_S2.xlsx]

## Sheet: SuppTable2
Supplementary Table 2. De novo mutations discovered in ART and Natural Mating G2 offspring using merged data
Chromosome	Position (mm39)	Position (mm38)	Sample ID	Genotype	Genotype Quality Score (GQ)	Read Depth (DP)	Allele Depth (AD)	Variant Quality (QUAL)	Cohort	Sex
chr1	99143229	99070954	1F-517	0/1	28	48	30,18	27	Natural	F
chr1	144933988	144809726	1F-517	0/1	45	50	23,27	46	Natural	F
chr1	185049123	184781320	1F-517	0/1	48	53	21,32	49	Natural	F
chr1	188582762	188314959	1F-517	0/1	31	40	26,14	30	Natural	F
chr2	5610427	5615238	1F-517	0/1	28	44	28,16	27	Natural	F
chr2	66967870	66798214	1F-517	0/1	42	49	28,21	42	Natural	F
chr3	20046889	20101053	1F-517	0/1	35	58	36,22	34	Natural	F
chr3	72155165	72062498	1F-517	0/1	43	54	22,32	43	Natural	F
chr5	22406181	22611179	1F-517	0/1	15	50	25,25	14	Natural	F
chr5	74205926	74366587	1F-517	0/1	23	65	42,23	22	Natural	F
chr7	35770425	35469850	1F-517	0/1	28	47	33,14	28	Natural	F
chr12	113663819	113627439	1F-517	0/1	43	50	26,24	43	Natural	F
chr15	79123163	79007363	1F-517	0/1	25	85	43,32	25	Natural	F
chr18	19063139	19196196	1F-517	0/1	43	60	28,31	43	Natural	F
chr1	48456208	48495367	1F-519	0/1	27	51	35,16	26	Natural	F
chr1	119909038	119836768	1F-519	0/1	28	70	45,25	28	Natural	F
chr1	126305965	126233702	1F-519	0/1	17	59	38,21	17	Natural	F
chr1	190287663	190019860	1F-519	0/1	41	67	23,44	42	Natural	F
chr2	148144770	147986690	1F-519	0/1	43	55	31,24	43	Natural	F
chr3	49152554	49107003	1F-519	0/1	34	47	28,19	34	Natural	F
chr3	135762767	135468528	1F-519	0/1	21	66	47,19	20	Natural	F
chr5	65229889	65387232	1F-519	0/1	11	46	36,10	10	Natural	F
chr6	56774818	56751803	1F-519	0/1	29	85	49,36	29	Natural	F
chr6	94803314	94780295	1F-519	0/1	41	57	30,27	41	Natural	F
chr9	26209084	26120380	1F-519	0/1	11	45	35,10	10	Natural	F
chr9	61180174	61087456	1F-519	0/1	38	63	36,27	38	Natural	F
chr10	126902637	126738506	1F-519	0/1	32	68	40,28	32	Natural	F
chr13	7032622	7082658	1F-519	0/1	19	27	20,7	19	Natural	F
chr14	105543004	105780438	1F-519	0/1	44	66	32,34	46	Natural	F
chr15	24040427	24040513	1F-519	0/1	30	54	35,19	29	Natural	F
chr15	25885063	25885149	1F-519	0/1	30	76	45,31	30	Natural	F
chr16	3547011	3364875	1F-519	0/1	19	83	56,27	18	Natural	F
chr17	59471574	59778569	1F-519	0/1	32	76	40,36	32	Natural	F
chr18	49616994	49750061	1F-519	0/1	22	40	29,11	22	Natural	F
chr1	70757010	70796169	1F-87	0/1	42	40	20,20	42	ART	F
chr1	162856600	162684169	1F-87	0/1	23	62	38,24	22	ART	F
chr3	48549196	48503631	1F-87	0/1	45	46	15,31	49	ART	F
chr4	28262451	28262451	1F-87	0/1	49	42	21,21	49	ART	F
chr4	83780146	83698383	1F-87	0/1	40	69	37,32	40	ART	F
chr5	56804423	56961765	1F-87	0/1	31	38	24,14	31	ART	F
chr5	110325056	110472922	1F-87	0/1	47	51	19,32	48	ART	F
chr5	116228157	116366216	1F-87	0/1	44	54	26,28	44	ART	F
chr5	139830282	139816037	1F-87	0/1	38	78	42,36	39	ART	F
chr6	58427696	58404681	1F-87	0/1	45	35	17,18	44	ART	F
chr6	77833702	77810685	1F-87	0/1	41	42	21,21	41	ART	F
chr7	79521054	79170802	1F-87	0/1	24	79	42,37	25	ART	F
chr7	91318116	90967324	1F-87	0/1	31	44	23,21	30	ART	F
chr7	120800032	120399255	1F-87	0/1	45	59	28,31	45	ART	F
chr8	100075539	100802171	1F-87	0/1	44	59	29,29	44	ART	F
chr9	87066197	86948250	1F-87	0/1	46	58	28,30	47	ART	F
chr9	108749280	108626479	1F-87	0/1	45	49	24,25	45	ART	F
chr10	44821517	44697613	1F-87	0/1	40	57	31,26	40	ART	F
chr12	114443707	114407327	1F-87	0/1	43	54	28,26	43	ART	F
chr14	56939886	57177343	1F-87	0/1	49	44	19,25	50	ART	F
chr14	58032071	58269528	1F-87	0/1	38	56	31,25	38	ART	F
chr14	98004154	98241590	1F-87	0/1	43	58	30,28	43	ART	F
chr14	99135552	99372988	1F-87	0/1	48	49	22,27	48	ART	F
chr15	43479373	43342769	1F-87	0/1	45	45	25,20	45	ART	F
chr16	56380727	56201090	1F-87	0/1	41	50	28,22	41	ART	F
chr19	33711949	33689349	1F-87	0/1	30	54	28,26	30	ART	F
chr19	33771522	33748922	1F-87	0/1	43	47	23,24	42	ART	F
chr1	25521633	25560714	1F-88	0/1	46	35	16,19	46	ART	F
chr1	116689014	116616744	1F-88	0/1	37	51	30,21	36	ART	F
chr1	189751155	189483352	1F-88	0/1	36	83	40,43	36	ART	F
chr3	11514580	11579640	1F-88	0/1	45	55	27,28	45	ART	F
chr3	112911024	112818340	1F-88	0/1	12	48	37,11	12	ART	F
chr4	4678560	4678560	1F-88	0/1	48	55	23,32	48	ART	F
chr5	58133369	58290711	1F-88	0/1	13	36	28,8	12	ART	F
chr6	75449858	75426841	1F-88	0/1	41	31	14,17	41	ART	F
chr6	127989678	127966641	1F-88	0/1	42	63	28,35	42	ART	F
chr7	77504025	77153773	1F-88	0/1	44	31	15,16	44	ART	F
chr8	110419053	111145685	1F-88	0/1	15	66	49,17	14	ART	F
chr9	121713715	121542781	1F-88	0/1	35	70	42,28	36	ART	F
chr11	58883401	58774227	1F-88	0/1	27	43	29,12	27	ART	F
chr12	115076935	115040555	1F-88	0/1	25	39	23,16	24	ART	F
chr14	44939019	45176476	1F-88	0/1	43	56	25,31	44	ART	F
chr15	66768864	66640713	1F-88	0/1	39	77	36,41	39	ART	F
chr17	43714295	44025186	1F-88	0/1	34	70	37,33	34	ART	F
chr1	22581899	22620980	1M-517	0/1	43	38	19,19	43	Natural	M
chr1	32823668	32862749	1M-517	0/1	43	55	29,26	43	Natural	M
chr2	32342413	32232425	1M-517	0/1	12	71	31,40	11	Natural	M
chr4	45750118	45750118	1M-517	0/1	41	67	33,34	42	Natural	M
chr4	47678130	47678130	1M-517	0/1	16	11	8,3	16	Natural	M
chr4	156273465	156625760	1M-517	0/1	31	78	45,33	30	Natural	M
chr5	124325207	124463270	1M-517	0/1	27	95	49,46	28	Natural	M
chr6	80790952	80767933	1M-517	0/1	15	17	14,3	14	Natural	M
chr7	48155300	47805048	1M-517	0/1	46	59	24,35	50	Natural	M
chr10	130379418	130215287	1M-517	0/1	30	49	19,30	32	Natural	M
chr12	57395746	57442532	1M-517	0/1	48	37	14,22	49	Natural	M
chr14	29211327	28933284	1M-517	0/1	34	72	36,36	33	Natural	M
chr14	68354114	68591563	1M-517	0/1	16	65	37,28	16	Natural	M
chr17	48375839	48682867	1M-517	0/1	28	80	53,27	27	Natural	M
chr18	67470122	67603192	1M-517	0/1	46	53	25,28	47	Natural	M
chr3	84729996	84637303	1M-519	0/1	34	65	40,24	34	Natural	M
chr3	133597606	133303367	1M-519	0/1	42	47	23,24	42	Natural	M
chr4	88411294	88329531	1M-519	0/1	27	55	37,18	27	Natural	M
chr5	32806616	32963960	1M-519	0/1	33	72	43,29	33	Natural	M
chr7	95188723	94837930	1M-519	0/1	17	56	40,15	17	Natural	M
chr9	32518123	32429419	1M-519	0/1	16	48	34,13	15	Natural	M
chr10	46577545	46453641	1M-519	0/1	44	63	27,36	45	Natural	M
chr11	41841803	41732630	1M-519	0/1	42	45	21,24	41	Natural	M
chr12	49665327	49712110	1M-519	0/1	18	50	35,15	17	Natural	M
chr14	120880779	121118191	1M-519	0/1	28	62	43,19	28	Natural	M
chr15	84349503	84233704	1M-519	0/1	34	71	41,30	34	Natural	M
chr18	85992872	86010997	1M-519	0/1	44	45	24,21	44	Natural	M
chr19	15217885	15195249	1M-519	0/1	45	62	27,35	45	Natural	M
chr1	32982855	33021936	1M-87	0/1	37	43	25,18	37	ART	M
chr1	152638646	152514397	1M-87	0/1	39	57	37,20	39	ART	M
chr1	157644844	157472414	1M-87	0/1	20	27	21,6	19	ART	M
chr2	132030669	131872589	1M-87	0/1	52	43	17,26	52	ART	M
chr3	31965461	32019610	1M-87	0/1	49	46	23,23	49	ART	M
chr5	6161406	6211406	1M-87	0/1	49	40	16,24	50	ART	M
chr5	120381477	120519542	1M-87	0/1	12	58	44,14	12	ART	M
chr6	104297000	104273961	1M-87	0/1	35	43	27,16	35	ART	M
chr8	80222117	80948746	1M-87	0/1	43	61	29,32	43	ART	M
chr10	114087387	113923292	1M-87	0/1	42	34	15,19	42	ART	M
chr12	90742281	90709055	1M-87	0/1	40	30	15,15	39	ART	M
chr12	95675661	95642435	1M-87	0/1	13	62	46,15	13	ART	M
chr13	81910335	82058454	1M-87	0/1	46	43	19,23	46	ART	M
chr13	97828197	97964705	1M-87	0/1	13	48	36,12	12	ART	M
chr14	42568490	42390447	1M-87	0/1	9	27	10,17	17	ART	M
chr14	91732946	91970382	1M-87	0/1	52	47	21,26	54	ART	M
chr16	18707617	18526367	1M-87	0/1	47	49	21,25	48	ART	M
chr18	47701017	47834084	1M-87	0/1	25	68	47,21	24	ART	M
chr19	22205570	22182934	1M-87	0/1	42	46	24,22	42	ART	M
chr1	80107083	80084800	1M-88	0/1	25	59	32,27	25	ART	M
chr1	190637391	190369588	1M-88	0/1	38	78	39,39	39	ART	M
chr4	91086880	90975117	1M-88	0/1	44	53	25,28	44	ART	M
chr5	134366197	134395051	1M-88	0/1	31	89	48,41	31	ART	M
chr6	15079018	15079017	1M-88	0/1	36	43	26,17	36	ART	M
chr6	36481907	36458842	1M-88	0/1	34	69	30,39	35	ART	M
chr8	31522287	32012315	1M-88	0/1	38	65	30,35	38	ART	M
chr9	66726052	66633334	1M-88	0/1	37	58	29,28	37	ART	M
chr9	89882416	89764469	1M-88	0/1	46	55	29,26	46	ART	M
chr10	14798919	14674663	1M-88	0/1	16	74	37,35	17	ART	M
chr10	45334425	45210521	1M-88	0/1	41	51	24,27	41	ART	M
chr11	22999630	22949630	1M-88	0/1	43	55	25,30	43	ART	M
chr11	36215276	36106103	1M-88	0/1	16	48	37,11	16	ART	M
chr12	72835572	72882346	1M-88	0/1	27	77	50,27	26	ART	M
chr13	86202158	86350277	1M-88	0/1	33	65	45,20	33	ART	M
chr14	107985905	108223337	1M-88	0/1	13	51	40,11	13	ART	M
chr15	45906406	45769802	1M-88	0/1	19	63	47,16	18	ART	M
chr15	78055528	77939728	1M-88	0/1	26	17	12,5	26	ART	M
chr16	71228215	71025103	1M-88	0/1	39	37	20,17	39	ART	M
chr1	33959964	33999045	2F-517	0/1	29	106	53,53	29	Natural	F
chr1	117022407	116950137	2F-517	0/1	30	42	33,9	30	Natural	F
chr1	163634452	163462021	2F-517	0/1	20	41	18,20	25	Natural	F
chr2	107231860	107062205	2F-517	0/1	38	48	27,20	37	Natural	F
chr2	169445740	169287660	2F-517	0/1	43	42	19,23	43	Natural	F
chr3	59478850	59386271	2F-517	0/1	49	39	18,21	49	Natural	F
chr3	65188787	65096208	2F-517	0/1	13	59	43,16	12	Natural	F
chr3	67599593	67506926	2F-517	0/1	28	59	31,28	29	Natural	F
chr4	27300233	27300233	2F-517	0/1	36	35	20,15	36	Natural	F
chr4	35411739	35411739	2F-517	0/1	23	49	31,17	22	Natural	F
chr4	44129539	44129539	2F-517	0/1	45	60	27,33	45	Natural	F
chr5	136157187	136186041	2F-517	0/1	45	60	32,28	45	Natural	F
chr7	18463764	18197689	2F-517	0/1	41	49	29,20	41	Natural	F
chr7	57794778	57444526	2F-517	0/1	15	54	41,13	15	Natural	F
chr8	18641208	18691224	2F-517	0/1	42	38	18,20	42	Natural	F
chr8	96681521	97408149	2F-517	0/1	27	72	47,25	26	Natural	F
chr9	104001617	103878816	2F-517	0/1	26	63	44,19	26	Natural	F
chr9	122563826	122392891	2F-517	0/1	42	65	33,32	42	Natural	F
chr11	101708351	101599177	2F-517	0/1	42	66	30,36	42	Natural	F
chr12	10084236	10134236	2F-517	0/1	41	37	18,19	41	Natural	F
chr17	13983275	14203537	2F-517	0/1	23	42	29,13	22	Natural	F
chr17	64312656	64619651	2F-517	0/1	37	53	31,22	37	Natural	F
chr2	95436951	95267296	2F-519	0/1	37	79	32,47	38	Natural	F
chr2	178806810	178448603	2F-519	0/1	23	68	32,34	23	Natural	F
chr3	107643231	107550547	2F-519	0/1	35	89	46,43	36	Natural	F
chr5	6403373	6453373	2F-519	0/1	45	62	28,34	45	Natural	F
chr5	16456048	16661046	2F-519	0/1	23	65	28,37	25	Natural	F
chr6	132901520	132878483	2F-519	0/1	46	55	28,27	46	Natural	F
chr7	89215860	88865068	2F-519	0/1	43	55	26,29	43	Natural	F
chr7	93018808	92668016	2F-519	0/1	22	74	54,20	22	Natural	F
chr11	5257779	5207779	2F-519	0/1	40	68	30,38	40	Natural	F
chr11	6986914	6936914	2F-519	0/1	40	83	39,44	42	Natural	F
chr12	21143534	21193535	2F-519	0/1	22	73	28,37	22	Natural	F
chr12	99129680	99095939	2F-519	0/1	35	99	44,55	37	Natural	F
chr13	3145589	3195589	2F-519	0/1	23	61	38,23	22	Natural	F
chr13	65460372	65608186	2F-519	0/1	42	69	31,38	42	Natural	F
chr13	102495304	102631812	2F-519	0/1	35	61	41,20	34	Natural	F
chr15	58202018	58065414	2F-519	0/1	31	70	41,29	31	Natural	F
chr17	50161395	50468423	2F-519	0/1	42	70	38,32	42	Natural	F
chr18	51560782	51693854	2F-519	0/1	36	65	35,30	36	Natural	F
chr18	80316423	80359638	2F-519	0/1	42	83	37,46	42	Natural	F
chr1	122843247	122770976	2M-517	0/1	19	55	39,16	18	Natural	M
chr2	12751081	12755892	2M-517	0/1	46	57	28,29	47	Natural	M
chr3	42810868	42765303	2M-517	0/1	38	56	33,23	38	Natural	M
chr5	3872482	3922482	2M-517	0/1	25	46	33,13	25	Natural	M
chr5	89449552	89597411	2M-517	0/1	32	50	34,16	32	Natural	M
chr7	127897265	127496437	2M-517	0/1	11	69	51,18	11	Natural	M
chr9	41240540	41151836	2M-517	0/1	44	61	33,28	44	Natural	M
chr10	10291269	10167013	2M-517	0/1	28	100	51,48	27	Natural	M
chr10	19671224	19546972	2M-517	0/1	30	84	48,36	30	Natural	M
chr11	57941990	57832816	2M-517	0/1	34	107	53,54	34	Natural	M
chr13	10044240	10094276	2M-517	0/1	46	51	26,25	46	Natural	M
chr13	42258433	42411909	2M-517	0/1	28	79	40,39	28	Natural	M
chr14	16594979	5874782	2M-517	0/1	25	74	36,38	25	Natural	M
chr14	38969078	38691035	2M-517	0/1	45	57	30,27	46	Natural	M
chr14	50795833	51033290	2M-517	0/1	20	107	70,33	20	Natural	M
chr14	84805211	85042651	2M-517	0/1	38	34	17,17	38	Natural	M
chr14	89107484	89344920	2M-517	0/1	30	60	38,22	30	Natural	M
chr15	30903955	30904101	2M-517	0/1	44	76	32,43	45	Natural	M
chr17	5362522	5412797	2M-517	0/1	34	90	46,44	34	Natural	M
chr2	46552127	46442139	2M-519	0/1	42	64	33,31	42	Natural	M
chr2	66161128	65991472	2M-519	0/1	18	68	47,20	17	Natural	M
chr2	75928873	75759217	2M-519	0/1	44	68	33,35	45	Natural	M
chr2	112473330	112303675	2M-519	0/1	42	59	31,28	42	Natural	M
chr3	88062392	87969699	2M-519	0/1	29	77	37,40	29	Natural	M
chr7	6809339	6812338	2M-519	0/1	28	50	34,16	27	Natural	M
chr8	31311525	31801553	2M-519	0/1	38	69	33,36	39	Natural	M
chr9	33314248	33225544	2M-519	0/1	34	61	33,28	34	Natural	M
chr9	57298310	57205593	2M-519	0/1	37	79	33,46	39	Natural	M
chr11	66081449	65972275	2M-519	0/1	47	62	22,40	50	Natural	M
chr12	26988977	27038976	2M-519	0/1	25	61	42,19	24	Natural	M
chr12	100930164	100896423	2M-519	0/1	24	75	44,30	23	Natural	M
chr14	12502170	9967591	2M-519	0/1	41	68	25,43	42	Natural	M
chr15	25738026	25738112	2M-519	0/1	37	58	34,24	37	Natural	M
chr17	76994836	77301830	2M-519	0/1	13	48	36,11	13	Natural	M
chr18	38979371	39112424	2M-519	0/1	22	65	44,21	21	Natural	M
chr19	39366997	39355441	2M-519	0/1	37	36	18,18	37	Natural	M
chr1	67059991	67099150	2M-87	0/1	37	74	41,33	37	ART	M
chr2	11638703	11643514	2M-87	0/1	21	39	19,20	20	ART	M
chr2	148491972	148333892	2M-87	0/1	43	46	26,20	43	ART	M
chr4	46430064	46430064	2M-87	0/1	36	77	34,43	37	ART	M
chr4	51148227	51148227	2M-87	0/1	27	56	39,17	26	ART	M
chr4	144387122	144113692	2M-87	0/1	45	49	25,24	45	ART	M
chr8	32968847	33458875	2M-87	0/1	33	51	34,17	33	ART	M
chr9	18643732	18555028	2M-87	0/1	39	57	30,27	38	ART	M
chr9	114103302	113932370	2M-87	0/1	53	43	17,26	53	ART	M
chr11	85741870	85632696	2M-87	0/1	44	66	33,33	44	ART	M
chr12	110236530	110202964	2M-87	0/1	21	86	42,42	21	ART	M
chr14	37687459	37409416	2M-87	0/1	16	59	45,14	15	ART	M
chr17	75988779	76295774	2M-87	0/1	38	64	35,27	38	ART	M
chr1	171546304	171373872	2M-88	0/1	33	38	19,18	33	ART	M
chr2	172792709	172634502	2M-88	0/1	36	75	40,35	36	ART	M
chr3	12438524	12503584	2M-88	0/1	17	24	19,5	16	ART	M
chr3	46845884	46800319	2M-88	0/1	46	42	16,26	47	ART	M
chr4	81059558	80977795	2M-88	0/1	41	44	22,22	40	ART	M
chr4	117044958	116902155	2M-88	0/1	13	74	54,20	12	ART	M
chr4	140928467	140655778	2M-88	0/1	42	69	37,32	42	ART	M
chr5	32083411	32240755	2M-88	0/1	45	47	24,23	45	ART	M
chr5	43826257	43983599	2M-88	0/1	40	72	30,42	41	ART	M
chr6	99640903	99617864	2M-88	0/1	18	65	46,19	17	ART	M
chr8	124105953	124832692	2M-88	0/1	29	86	37,49	30	ART	M
chr9	46205837	46117135	2M-88	0/1	30	57	36,21	30	ART	M
chr9	58513805	58421088	2M-88	0/1	40	46	25,21	40	ART	M
chr10	16035104	15910852	2M-88	0/1	42	32	17,15	42	ART	M
chr11	11703138	11653138	2M-88	0/1	44	57	29,28	44	ART	M
chr11	64069875	63960701	2M-88	0/1	38	43	26,17	37	ART	M
chr11	91216534	91107360	2M-88	0/1	46	38	16,22	47	ART	M
chr12	5814101	5864101	2M-88	0/1	39	68	36,32	40	ART	M
chr12	33513986	33563985	2M-88	0/1	43	36	16,20	44	ART	M
chr13	82442987	82591106	2M-88	0/1	44	32	15,17	44	ART	M
chr13	88564994	88713113	2M-88	0/1	37	30	17,12	37	ART	M
chr14	26368238	26089393	2M-88	0/1	23	33	25,8	22	ART	M
chr14	58581355	58818804	2M-88	0/1	40	72	40,32	40	ART	M
chr15	37289917	37290161	2M-88	0/1	11	70	50,20	10	ART	M
chr16	38212548	38032910	2M-88	0/1	16	87	62,25	15	ART	M
chr16	59067711	58888074	2M-88	0/1	46	45	18,27	47	ART	M
chr17	20391389	20611651	2M-88	0/1	38	50	26,24	38	ART	M
chr17	39052490	39363381	2M-88	0/1	32	58	38,20	32	ART	M
chr19	35310568	35287968	2M-88	0/1	16	26	18,8	16	ART	M
chr1	167604261	167431830	3F-517	0/1	45	62	31,31	46	Natural	F
chr3	118570480	118364129	3F-517	0/1	39	57	33,24	39	Natural	F
chr4	98958794	98847031	3F-517	0/1	29	67	43,24	29	Natural	F
chr5	70367521	70524864	3F-517	0/1	10	42	31,11	10	Natural	F
chr6	89732047	89709029	3F-517	0/1	40	72	34,38	41	Natural	F
chr6	115662466	115639427	3F-517	0/1	49	53	20,33	50	Natural	F
chr10	32117768	31993764	3F-517	0/1	43	53	19,34	45	Natural	F
chr10	47185002	47061098	3F-517	0/1	18	47	35,12	18	Natural	F
chr10	74185934	74021766	3F-517	0/1	47	49	21,28	48	Natural	F
chr10	97641120	97476982	3F-517	0/1	39	34	18,16	39	Natural	F
chr10	112319006	112154911	3F-517	0/1	32	63	36,27	32	Natural	F
chr12	112534738	112501172	3F-517	0/1	35	74	39,35	35	Natural	F
chr13	47463810	47617286	3F-517	0/1	23	109	54,55	23	Natural	F
chr14	86818639	87056075	3F-517	0/1	34	60	25,34	35	Natural	F
chr15	9645382	9645468	3F-517	0/1	48	53	24,29	50	Natural	F
chr15	95211181	95109062	3F-517	0/1	38	65	36,29	38	Natural	F
chr16	83137791	82934679	3F-517	0/1	41	57	29,28	41	Natural	F
chr17	28216123	28435097	3F-517	0/1	24	85	42,43	24	Natural	F
chr17	69823551	70130546	3F-517	0/1	36	74	38,36	37	Natural	F
chr1	5738317	5808540	3F-519	0/1	43	51	19,32	44	Natural	F
chr2	30687445	30577457	3F-519	0/1	36	77	32,45	37	Natural	F
chr2	161811895	161653815	3F-519	0/1	35	26	10,16	35	Natural	F
chr3	146909426	146615181	3F-519	0/1	34	62	35,27	34	Natural	F
chr4	45528567	45528567	3F-519	0/1	40	69	30,39	41	Natural	F
chr4	79457808	79376045	3F-519	0/1	31	71	38,33	31	Natural	F
chr4	81653965	81572202	3F-519	0/1	38	54	28,26	37	Natural	F
chr5	37315576	37472920	3F-519	0/1	36	79	32,47	38	Natural	F
chr5	44503043	44660385	3F-519	0/1	19	73	49,24	19	Natural	F
chr5	139202723	139188478	3F-519	0/1	29	97	47,50	29	Natural	F
chr6	21211650	21211649	3F-519	0/1	39	48	23,25	39	Natural	F
chr6	79962050	79939033	3F-519	0/1	37	52	29,23	37	Natural	F
chr6	100496415	100473376	3F-519	0/1	28	100	40,60	31	Natural	F
chr11	112035361	111926187	3F-519	0/1	40	52	28,24	40	Natural	F
chr12	108191193	108157452	3F-519	0/1	24	79	53,26	23	Natural	F
chr12	111349133	111315567	3F-519	0/1	39	66	29,37	40	Natural	F
chr13	97649743	97786251	3F-519	0/1	41	70	33,37	41	Natural	F
chr13	116526074	116662610	3F-519	0/1	42	60	29,31	42	Natural	F
chr14	93127553	93364989	3F-519	0/1	40	49	26,23	39	Natural	F
chr16	27526486	27345238	3F-519	0/1	45	45	21,24	45	Natural	F
chr19	13540552	13517916	3F-519	0/1	42	53	23,30	42	Natural	F
chr19	15500370	15477734	3F-519	0/1	30	58	39,19	29	Natural	F
chr19	34898055	34875455	3F-519	0/1	44	48	21,27	44	Natural	F
chr1	58906643	58945802	3M-517	0/1	42	52	27,25	42	Natural	M
chr1	112126891	112054621	3M-517	0/1	31	71	37,34	31	Natural	M
chr2	113841643	113671988	3M-517	0/1	30	106	50,56	32	Natural	M
chr6	13407683	13407682	3M-517	0/1	40	55	33,22	40	Natural	M
chr6	102609645	102586606	3M-517	0/1	41	49	22,27	42	Natural	M
chr7	23247919	22947344	3M-517	0/1	17	76	34,42	18	Natural	M
chr7	118990255	118589478	3M-517	0/1	22	79	54,25	21	Natural	M
chr11	50641366	50532193	3M-517	0/1	38	53	27,26	38	Natural	M
chr14	70933720	71171160	3M-517	0/1	40	53	26,27	40	Natural	M
chr14	90121567	90359003	3M-517	0/1	47	52	20,32	49	Natural	M
chr14	100011850	100249286	3M-517	0/1	12	50	37,13	12	Natural	M
chr15	33510748	33510894	3M-517	0/1	27	79	44,35	28	Natural	M
chr16	68571209	68368097	3M-517	0/1	41	48	23,25	41	Natural	M
chr17	15148631	15368893	3M-517	0/1	20	65	46,19	20	Natural	M
chr3	29796726	29850875	3M-519	0/1	43	43	21,22	43	Natural	M
chr4	88564435	88482672	3M-519	0/1	15	37	26,11	14	Natural	M
chr8	39420407	39873448	3M-519	0/1	46	48	25,23	46	Natural	M
chr8	117139617	117866356	3M-519	0/1	18	63	45,18	18	Natural	M
chr12	113663946	113627566	3M-519	0/1	47	61	28,33	47	Natural	M
chr13	85628926	85777045	3M-519	0/1	35	51	29,22	35	Natural	M
chr14	22274844	22324912	3M-519	0/1	37	60	36,24	37	Natural	M
chr15	19389401	19389487	3M-519	0/1	44	52	23,29	45	Natural	M
chr16	68234353	68031241	3M-519	0/1	33	42	26,15	32	Natural	M
chr16	81198618	80995506	3M-519	0/1	29	43	29,14	28	Natural	M
chr17	39600936	39911827	3M-519	0/1	44	62	31,31	44	Natural	M
chr1	32496974	32536055	3M-87	0/1	40	59	34,25	40	ART	M
chr1	90207097	90134819	3M-87	0/1	32	69	30,39	32	ART	M
chr1	98949260	98876985	3M-87	0/1	41	45	24,20	41	ART	M
chr1	162213906	162041475	3M-87	0/1	36	76	31,45	38	ART	M
chr2	10179122	10183933	3M-87	0/1	19	73	43,30	19	ART	M
chr2	86135443	85965787	3M-87	0/1	10	39	30,9	10	ART	M
chr2	107700404	107530749	3M-87	0/1	33	79	34,45	33	ART	M
chr2	154751657	154593577	3M-87	0/1	15	60	44,16	15	ART	M
chr3	42078102	42032537	3M-87	0/1	30	74	37,37	29	ART	M
chr3	58769571	58676992	3M-87	0/1	37	63	37,26	36	ART	M
chr3	96927713	96835029	3M-87	0/1	27	77	34,43	28	ART	M
chr4	7042005	7042005	3M-87	0/1	47	50	26,24	47	ART	M
chr4	25128557	25128557	3M-87	0/1	35	65	36,29	35	ART	M
chr4	113920565	113777762	3M-87	0/1	35	53	26,26	34	ART	M
chr4	150493125	150577582	3M-87	0/1	11	72	53,19	10	ART	M
chr5	85141686	85289545	3M-87	0/1	43	58	28,30	43	ART	M
chr6	59484740	59461725	3M-87	0/1	49	56	23,33	50	ART	M
chr7	113623146	113222353	3M-87	0/1	38	66	35,31	38	ART	M
chr8	45864339	46317376	3M-87	0/1	47	56	22,34	48	ART	M
chr8	60002218	60455252	3M-87	0/1	38	59	27,31	39	ART	M
chr9	33207798	33119094	3M-87	0/1	44	50	26,24	44	ART	M
chr9	47192229	47103527	3M-87	0/1	19	83	54,28	19	ART	M
chr9	82418054	82300107	3M-87	0/1	36	58	35,22	36	ART	M
chr11	23889519	23839519	3M-87	0/1	22	35	26,9	22	ART	M
chr11	95451173	95341999	3M-87	0/1	27	79	39,40	28	ART	M
chr12	93486862	93453636	3M-87	0/1	37	60	38,22	37	ART	M
chr12	109020553	108986479	3M-87	0/1	42	41	16,25	43	ART	M
chr13	97065372	97201880	3M-87	0/1	29	83	44,39	29	ART	M
chr14	14184808	8284953	3M-87	0/1	41	70	34,36	41	ART	M
chr15	48921787	48785183	3M-87	0/1	31	40	26,14	31	ART	M
chr16	62827538	62647901	3M-87	0/1	40	56	33,23	40	ART	M
chr18	35851213	35984266	3M-87	0/1	15	87	63,24	14	ART	M
chr18	67312514	67445584	3M-87	0/1	20	65	46,19	20	ART	M
chr1	55478969	55518128	3M-88	0/1	45	45	22,23	45	ART	M
chr1	59325620	59364779	3M-88	0/1	16	50	37,13	16	ART	M
chr2	29581679	29471691	3M-88	0/1	37	74	36,38	37	ART	M
chr2	83452319	83282663	3M-88	0/1	26	68	29,38	26	ART	M
chr3	112951872	112859188	3M-88	0/1	28	56	38,17	27	ART	M
chr5	53402886	53560228	3M-88	0/1	45	62	29,33	45	ART	M
chr5	130711143	130739984	3M-88	0/1	47	61	32,29	47	ART	M
chr6	33780128	33757063	3M-88	0/1	22	41	30,11	22	ART	M
chr6	42006930	41983864	3M-88	0/1	16	27	21,6	15	ART	M
chr6	91289484	91266466	3M-88	0/1	37	60	35,25	37	ART	M
chr7	113092118	112691325	3M-88	0/1	47	55	29,26	47	ART	M
chr7	141533827	141113740	3M-88	0/1	38	75	36,39	39	ART	M
chr9	18676056	18587352	3M-88	0/1	46	41	18,23	46	ART	M
chr9	71464219	71371501	3M-88	0/1	18	59	40,16	17	ART	M
chr9	83959332	83841385	3M-88	0/1	40	57	29,28	40	ART	M
chr10	3260601	3210601	3M-88	0/1	44	51	27,24	43	ART	M
chr10	80958331	80794165	3M-88	0/1	33	91	44,47	33	ART	M
chr11	17551955	17501955	3M-88	0/1	42	56	27,29	43	ART	M
chr12	79704901	79751675	3M-88	0/1	21	56	39,17	20	ART	M
chr13	61432352	61580166	3M-88	0/1	41	36	18,18	40	ART	M
chr15	59887098	59758947	3M-88	0/1	41	68	36,32	42	ART	M
chr15	61612937	61484786	3M-88	0/1	13	14	10,4	13	ART	M
chr19	14263357	14240721	3M-88	0/1	16	56	42,14	15	ART	M
chr3	89253777	89161084	4M-517	0/1	40	55	25,30	40	Natural	M
chr3	147749371	147455007	4M-517	0/1	40	68	34,34	41	Natural	M
chr4	46768989	46768989	4M-517	0/1	40	64	30,34	39	Natural	M
chr6	67444980	67421964	4M-517	0/1	43	51	25,26	43	Natural	M
chr7	36121546	35820971	4M-517	0/1	41	61	30,31	41	Natural	M
chr8	88933973	89660601	4M-517	0/1	45	48	19,29	45	Natural	M
chr8	115347285	116074024	4M-517	0/1	32	75	47,28	32	Natural	M
chr9	7150210	7150210	4M-517	0/1	47	48	22,26	47	Natural	M
chr9	24609019	24520315	4M-517	0/1	29	75	28,47	31	Natural	M
chr10	18885460	18761208	4M-517	0/1	39	52	27,24	39	Natural	M
chr12	69551368	69598142	4M-517	0/1	37	75	34,41	40	Natural	M
chr14	74823159	75060599	4M-517	0/1	38	44	22,22	38	Natural	M
chr17	82850932	83158361	4M-517	0/1	27	61	40,21	27	Natural	M
chr18	3115748	3115748	4M-517	0/1	21	301	245,38	23	Natural	M
chr1	40062579	40101739	4M-519	0/1	38	98	50,48	39	Natural	M
chr1	65428679	65467838	4M-519	0/1	45	64	31,32	45	Natural	M
chr2	106047651	105877996	4M-519	0/1	39	53	32,21	38	Natural	M
chr2	106197670	106028015	4M-519	0/1	34	72	27,45	37	Natural	M
chr2	140545124	140387044	4M-519	0/1	41	51	24,27	41	Natural	M
chr3	44673299	44627734	4M-519	0/1	40	56	30,26	40	Natural	M
chr4	106053757	105910954	4M-519	0/1	46	70	34,36	46	Natural	M
chr5	115083499	115221558	4M-519	0/1	13	85	56,29	12	Natural	M
chr5	138778633	138764388	4M-519	0/1	28	82	49,33	28	Natural	M
chr5	143552392	143538147	4M-519	0/1	27	46	22,22	27	Natural	M
chr6	142342618	142288344	4M-519	0/1	10	62	30,30	12	Natural	M
chr6	144734169	144679895	4M-519	0/1	35	75	31,44	36	Natural	M
chr7	77318112	76967860	4M-519	0/1	36	61	31,30	36	Natural	M
chr8	77240103	77966732	4M-519	0/1	39	71	29,42	40	Natural	M
chr8	83158588	83885217	4M-519	0/1	35	58	36,22	35	Natural	M
chr10	60579985	60415764	4M-519	0/1	24	97	56,41	23	Natural	M
chr12	6437226	6487226	4M-519	0/1	41	42	21,21	41	Natural	M
chr13	119431134	119567670	4M-519	0/1	41	53	20,33	43	Natural	M
chr14	66807686	67045135	4M-519	0/1	43	64	28,36	44	Natural	M
chr14	97076376	97313812	4M-519	0/1	42	59	33,26	42	Natural	M
chr15	41911270	41774666	4M-519	0/1	31	55	33,22	30	Natural	M
chr17	7064588	7331987	4M-519	0/1	40	74	38,36	40	Natural	M
chr18	22558769	22691826	4M-519	0/1	35	71	36,35	35	Natural	M
chr18	46482834	46615901	4M-519	0/1	27	77	46,31	27	Natural	M
chr19	26182040	26159440	4M-519	0/1	45	58	31,27	45	Natural	M
chr1	19987218	20057442	4M-87	0/1	40	60	30,30	40	ART	M
chr1	99249495	99177220	4M-87	0/1	48	47	19,28	50	ART	M
chr1	180305639	180133204	4M-87	0/1	24	78	44,34	24	ART	M
chr2	91284201	91114546	4M-87	0/1	44	48	24,24	44	ART	M
chr3	101675947	101583263	4M-87	0/1	40	54	25,28	40	ART	M
chr3	133332785	133038546	4M-87	0/1	43	55	27,28	43	ART	M
chr4	10170565	10170565	4M-87	0/1	36	60	38,22	36	ART	M
chr4	77841176	77759413	4M-87	0/1	45	44	23,21	45	ART	M
chr5	41584853	41742196	4M-87	0/1	27	35	23,12	26	ART	M
chr5	45863627	46020969	4M-87	0/1	44	35	11,24	47	ART	M
chr5	130946306	130975144	4M-87	0/1	29	75	38,37	29	ART	M
chr6	26240362	26240361	4M-87	0/1	22	43	31,12	22	ART	M
chr7	61595284	61245032	4M-87	0/1	48	45	20,25	49	ART	M
chr8	25027953	25517969	4M-87	0/1	33	85	41,44	33	ART	M
chr8	118634660	119361399	4M-87	0/1	35	79	41,38	35	ART	M
chr10	26906624	26782620	4M-87	0/1	27	24	17,7	26	ART	M
chr10	30774831	30650827	4M-87	0/1	41	38	20,18	41	ART	M
chr10	44305481	44181477	4M-87	0/1	46	54	21,33	47	ART	M
chr10	71308678	71144508	4M-87	0/1	42	65	33,32	42	ART	M
chr10	73223420	73059252	4M-87	0/1	35	45	29,16	35	ART	M
chr10	88144361	87980223	4M-87	0/1	47	60	24,36	49	ART	M
chr10	112809033	112644938	4M-87	0/1	39	35	17,17	39	ART	M
chr11	64711915	64602741	4M-87	0/1	42	61	39,22	42	ART	M
chr11	111092190	110983016	4M-87	0/1	44	40	19,21	43	ART	M
chr12	88437222	88403992	4M-87	0/1	36	48	31,17	35	ART	M
chr12	92788308	92755082	4M-87	0/1	37	23	14,9	36	ART	M
chr13	66013070	66160884	4M-87	0/1	19	52	25,27	21	ART	M
chr15	13394947	13395033	4M-87	0/1	43	38	21,17	42	ART	M
chr15	19835513	19835599	4M-87	0/1	44	52	24,28	44	ART	M
chr16	81194962	80991850	4M-87	0/1	47	52	21,31	48	ART	M
chr17	39161130	39472021	4M-87	0/1	42	57	29,28	43	ART	M
chr17	60062430	60369425	4M-87	0/1	45	39	19,18	45	ART	M
chr18	9098379	9098379	4M-87	0/1	36	30	18,12	36	ART	M
chr18	17565389	17698446	4M-87	0/1	42	52	25,27	42	ART	M
chr2	95885805	95716150	4M-88	0/1	45	31	14,16	45	ART	M
chr2	174297420	174139213	4M-88	0/1	21	68	49,19	20	ART	M
chr6	25838376	25838375	4M-88	0/1	47	45	22,23	47	ART	M
chr7	71578386	71228134	4M-88	0/1	40	50	29,21	39	ART	M
chr7	84450676	84099884	4M-88	0/1	45	65	35,30	45	ART	M
chr9	98469033	98351086	4M-88	0/1	41	50	27,23	40	ART	M
chr9	101136742	101013941	4M-88	0/1	46	45	20,25	47	ART	M
chr10	36372484	36248480	4M-88	0/1	43	42	19,23	43	ART	M
chr11	39563189	39454016	4M-88	0/1	44	31	13,18	44	ART	M
chr11	42689381	42580208	4M-88	0/1	18	31	16,15	22	ART	M
chr12	87957285	87924055	4M-88	0/1	26	33	13,20	34	ART	M
chr14	75101598	75339038	4M-88	0/1	39	62	36,26	39	ART	M
chr14	109621427	109858859	4M-88	0/1	48	44	22,21	47	ART	M
chr15	88366034	88250235	4M-88	0/1	35	72	35,37	36	ART	M
chr18	22213330	22346387	4M-88	0/1	13	47	36,11	13	ART	M
chr18	54430454	54563526	4M-88	0/1	19	34	24,10	18	ART	M
chr1	17058427	17128651	5M-519	0/1	35	75	44,31	35	Natural	M
chr1	165227844	165055413	5M-519	0/1	27	82	44,38	27	Natural	M
chr5	42445418	42602761	5M-519	0/1	42	63	25,38	43	Natural	M
chr7	65177199	64826947	5M-519	0/1	39	59	29,26	39	Natural	M
chr7	82211020	81860768	5M-519	0/1	46	50	21,29	46	Natural	M
chr7	139360885	138940801	5M-519	0/1	27	47	28,14	26	Natural	M
chr7	144112142	143665879	5M-519	0/1	29	79	31,48	32	Natural	M
chr12	89185465	89152235	5M-519	0/1	46	54	25,29	46	Natural	M
chr13	31148018	31332001	5M-519	0/1	39	55	30,25	39	Natural	M
chr14	103595438	103832874	5M-519	0/1	32	48	21,21	32	Natural	M
chr15	28815401	28815547	5M-519	0/1	38	64	36,28	38	Natural	M
chr15	88167434	88051635	5M-519	0/1	29	86	37,49	29	Natural	M
chr15	88637071	88521274	5M-519	0/1	39	68	31,37	40	Natural	M
chr16	79056536	78853424	5M-519	0/1	37	62	29,32	37	Natural	M
chr1	37761031	37800112	5M-87	0/1	13	71	48,18	13	ART	M
chr1	62093109	62132268	5M-87	0/1	41	52	28,23	41	ART	M
chr1	147758619	147634357	5M-87	0/1	38	27	13,14	37	ART	M
chr2	10176401	10181212	5M-87	0/1	40	62	35,27	39	ART	M
chr3	102259335	102166651	5M-87	0/1	37	76	35,41	37	ART	M
chr5	3392343	3442343	5M-87	0/1	44	95	59,36	44	ART	M
chr5	34850947	35008291	5M-87	0/1	48	30	12,18	49	ART	M
chr5	42383424	42540767	5M-87	0/1	48	36	18,18	49	ART	M
chr5	57968694	58126036	5M-87	0/1	19	44	32,12	18	ART	M
chr6	109664782	109641743	5M-87	0/1	21	28	20,8	21	ART	M
chr7	46230263	45879687	5M-87	0/1	39	50	30,20	39	ART	M
chr9	79336693	79243975	5M-87	0/1	49	39	18,21	50	ART	M
chr10	94954365	94790227	5M-87	0/1	26	80	53,27	26	ART	M
chr11	121363780	121254606	5M-87	0/1	31	50	34,16	30	ART	M
chr13	23774024	23958007	5M-87	0/1	40	64	35,29	40	ART	M
chr1	28101974	28141055	5M-88	0/1	11	23	19,4	10	ART	M
chr1	123830540	123758269	5M-88	0/1	46	32	15,17	46	ART	M
chr1	157906379	157733949	5M-88	0/1	37	45	28,17	37	ART	M
chr2	35938370	35828382	5M-88	0/1	47	54	26,28	47	ART	M
chr3	28838904	28893053	5M-88	0/1	30	57	35,22	29	ART	M
chr5	41862094	42019437	5M-88	0/1	11	11	8,3	10	ART	M
chr6	18077763	18077762	5M-88	0/1	33	42	26,16	33	ART	M
chr6	24615515	24615514	5M-88	0/1	46	61	31,30	46	ART	M
chr7	50576966	50226714	5M-88	0/1	41	60	37,22	40	ART	M
chr7	89658330	89307538	5M-88	0/1	29	59	43,16	29	ART	M
chr8	5242962	5292962	5M-88	0/1	42	30	15,15	42	ART	M
chr11	49469211	49360038	5M-88	0/1	29	77	44,33	29	ART	M
chr12	69349621	69396395	5M-88	0/1	18	61	39,22	18	ART	M
chr12	70930822	70977596	5M-88	0/1	45	57	28,29	45	ART	M
chr13	102856682	102993190	5M-88	0/1	45	50	21,29	45	ART	M
chr14	45579933	45817390	5M-88	0/1	38	40	22,17	37	ART	M
chr15	46159494	46022890	5M-88	0/1	32	15	8,7	32	ART	M
chr16	19744131	19562881	5M-88	0/1	49	54	27,27	49	ART	M
chr17	41721727	42032618	5M-88	0/1	28	60	34,26	28	ART	M
chr18	85758860	85776985	5M-88	0/1	27	35	23,12	26	ART	M
chr2	97808111	97638456	6M-519	0/1	47	52	18,33	51	Natural	M
chr2	109975704	109806049	6M-519	0/1	39	73	35,38	39	Natural	M
chr2	112103724	111934069	6M-519	0/1	39	62	26,35	40	Natural	M
chr3	30117220	30171369	6M-519	0/1	45	58	26,32	46	Natural	M
chr3	67354197	67261530	6M-519	0/1	29	80	48,32	29	Natural	M
chr3	153983629	153689266	6M-519	0/1	31	33	20,13	31	Natural	M
chr7	56731904	56381652	6M-519	0/1	24	97	58,39	24	Natural	M
chr8	63890882	64343916	6M-519	0/1	33	67	40,27	32	Natural	M
chr8	101400585	102127217	6M-519	0/1	39	51	29,22	39	Natural	M
chr10	116376308	116212213	6M-519	0/1	11	72	52,19	10	Natural	M
chr11	76768057	76658883	6M-519	0/1	30	70	42,28	30	Natural	M
chr12	5792590	5842590	6M-519	0/1	33	57	38,19	32	Natural	M
chr12	36163158	36213157	6M-519	0/1	38	57	29,28	38	Natural	M
chr12	87740881	NA	6M-519	0/1	42	73	27,44	44	Natural	M
chr12	95074694	95041468	6M-519	0/1	32	65	41,24	32	Natural	M
chr13	15754327	15928912	6M-519	0/1	39	66	31,35	40	Natural	M
chr16	78853708	78650596	6M-519	0/1	45	48	23,25	45	Natural	M
chr17	75541546	75848541	6M-519	0/1	26	79	40,39	26	Natural	M
