# Supplementary material for: Modest increase in the de novo single-nucleotide mutation rate in house mice born by assisted reproduction
Source: HighWire-hosted journal article supplement (doi:10.1101/gr.281180.125), 2025-11-13
Supplement: Supplemental_Table_S4.xlsx [file Supplemental_Table_S4.xlsx]

## Sheet: dnSNV_library_matrix
Supplementary Table 4. VCF format variant calls for all samples at de novo mutation sites discovered in Seq2 samples. Samples are labeled according to the format {Sample ID}_{Generation: G0|G1|G2}_{Sex: M|F}_{Cohort: Natural|ART}
Chromosome	Position	SNP ID	REF	ALT	QUAL	INFO	FORMAT	121586_G1_M_ART	121587_G1_F_ART	121588_G1_F_ART	1F-517_G2_F_NATURAL	1F-519_G2_F_NATURAL	1F-87_G2_F_ART	1F-88_G2_F_ART	1M-517_G2_M_NATURAL	1M-519_G2_M_NATURAL	1M-87_G2_M_ART	1M-88_G2_M_ART	2F-517_G2_F_NATURAL	2F-519_G2_F_NATURAL	2M-517_G2_M_NATURAL	2M-519_G2_M_NATURAL	2M-87_G2_M_ART	2M-88_G2_M_ART	3F-517_G2_F_NATURAL	3F-519_G2_F_NATURAL	3M-517_G2_M_NATURAL	3M-519_G2_M_NATURAL	3M-87_G2_M_ART	3M-88_G2_M_ART	492_G0_F	493_G0_M	4M-517_G2_M_NATURAL	4M-519_G2_M_NATURAL	4M-87_G2_M_ART	4M-88_G2_M_ART	517_G1_F_NATURAL	518_G1_M_NATURAL	519_G1_F_NATURAL	5M-519_G2_M_NATURAL	5M-87_G2_M_ART	5M-88_G2_M_ART	6M-519_G2_M_NATURAL	Library
chr1	5738317	chr1_5738317_T_G	T	G	42	AF=0.013889;AQ=42	GT:DP:AD:GQ:PL:RNC	0/0:28:28,0:50:0,99,989:..	0/0:19:19,0:50:0,60,599:..	0/0:26:26,0:50:0,81,809:..	0/0:26:26,0:48:0,84,839:..	0/0:24:24,0:50:0,75,749:..	0/0:18:18,0:50:0,69,689:..	0/0:18:18,0:50:0,54,539:..	0/0:25:25,0:50:0,102,1019:..	0/0:28:28,0:50:0,66,899:..	0/0:25:25,0:48:0,75,749:..	0/0:23:23,0:50:0,69,689:..	0/0:23:23,0:48:0,72,719:..	0/0:25:25,0:45:0,45,689:..	0/0:24:24,0:50:0,72,719:..	0/0:26:26,0:48:0,114,1139:..	0/0:21:21,0:50:0,63,629:..	0/0:18:18,0:50:0,66,659:..	0/0:18:18,0:50:0,81,809:..	0/1:23:8,15:42:42,0,47:..	0/0:19:19,0:50:0,66,659:..	0/0:23:23,0:50:0,72,719:..	0/0:20:20,0:48:0,75,749:..	0/0:18:18,0:50:0,57,569:..	0/0:22:22,0:50:0,72,719:..	0/0:18:18,0:50:0,54,539:..	0/0:19:19,0:50:0,57,569:..	0/0:16:16,0:48:0,48,479:..	0/0:20:20,0:50:0,66,659:..	0/0:27:27,0:50:0,105,1049:..	0/0:16:16,0:48:0,48,479:..	0/0:23:23,0:50:0,72,719:..	0/0:20:20,0:50:0,66,659:..	0/0:21:21,0:50:0,72,719:..	0/0:19:19,0:50:0,63,629:..	0/0:24:24,0:48:0,72,719:..	0/0:25:25,0:50:0,75,749:..	seq2
chr1	17058427	chr1_17058427_C_T	C	T	35	AF=0.013889;AQ=35	GT:DP:AD:GQ:PL:RNC	0/0:21:21,0:50:0,63,629:..	0/0:21:21,0:48:0,75,749:..	0/0:20:20,0:50:0,90,899:..	0/0:23:23,0:48:0,69,689:..	0/0:21:21,0:48:0,108,1079:..	0/0:21:21,0:50:0,63,629:..	0/0:24:24,0:48:0,84,839:..	0/0:17:17,0:48:0,60,599:..	0/0:21:21,0:50:0,75,749:..	0/0:19:19,0:48:0,93,929:..	0/0:22:22,0:50:0,66,659:..	0/0:20:20,0:50:0,75,749:..	0/0:21:21,0:48:0,63,629:..	0/0:16:16,0:48:0,63,629:..	0/0:16:16,0:48:0,81,809:..	0/0:24:24,0:48:0,78,779:..	0/0:24:24,0:50:0,72,719:..	0/0:23:23,0:48:0,93,929:..	0/0:16:16,0:48:0,48,479:..	0/0:23:23,0:48:0,48,719:..	0/0:21:21,0:48:0,66,659:..	0/0:20:20,0:50:0,87,869:..	0/0:16:16,0:48:0,72,719:..	0/0:28:28,0:50:0,96,959:..	0/0:20:20,0:50:0,60,599:..	0/0:22:22,0:48:0,87,869:..	0/0:19:19,0:48:0,75,749:..	0/0:16:16,0:48:0,48,479:..	0/0:20:20,0:50:0,78,779:..	0/0:22:22,0:50:0,75,749:..	0/0:23:23,0:50:0,90,899:..	0/0:22:22,0:48:0,81,809:..	0/1:29:18,11:35:35,0,53:..	0/0:19:19,0:50:0,57,569:..	0/0:16:16,0:48:0,54,539:..	0/0:16:16,0:48:0,60,599:..	seq2
chr1	19987218	chr1_19987218_T_G	T	G	34	AF=0.013889;AQ=34	GT:DP:AD:GQ:PL:RNC	0/0:16:16,0:48:0,51,509:..	0/0:16:16,0:48:0,84,839:..	0/0:22:22,0:50:0,72,719:..	0/0:21:21,0:48:0,75,749:..	0/0:16:16,0:48:0,69,689:..	0/0:17:17,0:48:0,69,689:..	0/0:16:16,0:48:0,48,479:..	0/0:24:24,0:48:0,48,719:..	0/0:19:19,0:50:0,63,629:..	0/0:24:24,0:50:0,93,929:..	0/0:18:18,0:50:0,69,689:..	0/0:16:16,0:48:0,81,809:..	0/0:18:18,0:50:0,57,569:..	0/0:24:24,0:48:0,75,749:..	0/0:23:23,0:48:0,81,809:..	0/0:23:23,0:50:0,69,689:..	0/0:24:24,0:48:0,87,869:..	0/0:22:22,0:48:0,48,719:..	0/0:24:24,0:48:0,87,869:..	0/0:20:20,0:48:0,60,599:..	0/0:22:22,0:50:0,126,1259:..	0/0:25:25,0:48:0,99,989:..	0/0:23:23,0:50:0,72,719:..	0/0:27:27,0:50:0,105,1049:..	0/0:21:21,0:48:0,72,719:..	0/0:24:24,0:48:0,75,749:..	0/0:23:23,0:50:0,102,1019:..	0/1:29:18,11:34:34,0,51:..	0/0:24:24,0:50:0,75,749:..	0/0:21:21,0:48:0,78,779:..	0/0:25:25,0:48:0,84,839:..	0/0:25:25,0:48:0,69,929:..	0/0:25:25,0:48:0,126,1259:..	0/0:23:23,0:48:0,105,1049:..	0/0:23:23,0:50:0,72,719:..	0/0:24:24,0:42:0,42,659:..	seq2
chr1	22581899	chr1_22581899_C_T	C	T	31	AF=0.013889;AQ=31	GT:DP:AD:GQ:PL:RNC	0/0:22:22,0:48:0,69,689:..	0/0:23:23,0:50:0,75,749:..	0/0:21:21,0:48:0,75,749:..	0/0:25:25,0:50:0,81,809:..	0/0:24:24,0:48:0,72,719:..	0/0:23:23,0:50:0,72,719:..	0/0:19:19,0:50:0,75,749:..	0/1:18:11,7:32:31,0,52:..	0/0:21:21,0:33:0,33,569:..	0/0:22:22,0:48:0,66,659:..	0/0:21:21,0:50:0,69,689:..	0/0:22:22,0:50:0,72,719:..	0/0:23:23,0:48:0,75,749:..	0/0:22:22,0:50:0,75,749:..	0/0:23:23,0:48:0,84,839:..	0/0:18:18,0:50:0,69,689:..	0/0:23:23,0:50:0,69,689:..	0/0:16:16,0:48:0,48,479:..	0/0:21:21,0:50:0,72,719:..	0/0:22:22,0:50:0,72,719:..	0/0:23:23,0:39:0,39,629:..	0/0:25:25,0:50:0,75,749:..	0/0:21:21,0:48:0,72,719:..	0/0:25:25,0:50:0,75,749:..	0/0:16:16,0:18:0,18,419:..	0/0:25:25,0:50:0,75,749:..	0/0:26:26,0:50:0,78,779:..	0/0:17:17,0:50:0,78,779:..	0/0:21:21,0:50:0,69,689:..	0/0:23:23,0:50:0,69,689:..	0/0:19:19,0:50:0,87,869:..	0/0:12:12,0:36:0,36,359:..	0/0:20:20,0:48:0,96,959:..	0/0:25:25,0:48:0,78,779:..	0/0:16:16,0:48:0,63,629:..	0/0:26:26,0:50:0,81,809:..	seq2
chr1	25521633	chr1_25521633_T_C	T	C	47	AF=0.013889;AQ=47	GT:DP:AD:GQ:PL:RNC	0/0:23:23,0:50:0,72,719:..	0/0:19:19,0:50:0,66,659:..	0/0:21:21,0:48:0,78,779:..	0/0:18:18,0:48:0,84,839:..	0/0:21:21,0:50:0,69,689:..	0/0:22:22,0:50:0,75,749:..	0/1:29:11,18:46:47,0,53:..	0/0:17:17,0:50:0,72,719:..	0/0:16:16,0:48:0,87,869:..	0/0:23:23,0:48:0,72,719:..	0/0:21:21,0:50:0,66,659:..	0/0:22:22,0:50:0,66,659:..	0/0:25:25,0:50:0,75,749:..	0/0:21:21,0:50:0,84,839:..	0/0:24:24,0:48:0,72,719:..	0/0:21:21,0:50:0,75,749:..	0/0:25:25,0:50:0,78,779:..	0/0:23:23,0:48:0,105,1049:..	0/0:24:24,0:48:0,81,809:..	0/0:21:21,0:50:0,72,719:..	0/0:20:20,0:48:0,63,629:..	0/0:20:20,0:50:0,72,719:..	0/0:22:22,0:48:0,69,689:..	0/0:21:21,0:48:0,66,659:..	0/0:16:16,0:48:0,72,719:..	0/0:20:20,0:48:0,111,1109:..	0/0:29:29,0:50:0,99,989:..	0/0:18:18,0:48:0,66,659:..	0/0:19:19,0:48:0,105,1049:..	0/0:20:20,0:50:0,66,659:..	0/0:18:18,0:50:0,75,749:..	0/0:20:20,0:50:0,63,629:..	0/0:20:20,0:48:0,90,899:..	0/0:23:23,0:50:0,75,749:..	0/0:16:16,0:48:0,60,599:..	0/0:22:22,0:50:0,75,749:..	seq2
chr1	32496974	chr1_32496974_C_T	C	T	42	AF=0.013889;AQ=42	GT:DP:AD:GQ:PL:RNC	0/0:25:25,0:50:0,78,779:..	0/0:17:17,0:50:0,63,629:..	0/0:19:19,0:48:0,60,599:..	0/0:24:24,0:48:0,72,719:..	0/0:24:24,0:50:0,72,719:..	0/0:21:21,0:50:0,72,719:..	0/0:25:25,0:48:0,87,869:..	0/0:29:29,0:50:0,102,1019:..	0/0:27:27,0:50:0,81,809:..	0/0:24:24,0:50:0,93,929:..	0/0:24:24,0:48:0,72,719:..	0/0:25:25,0:48:0,75,749:..	0/0:25:25,0:50:0,75,749:..	0/0:30:30,0:50:0,90,899:..	0/0:21:21,0:48:0,66,659:..	0/0:24:24,0:48:0,78,779:..	0/0:26:26,0:50:0,96,959:..	0/0:18:18,0:50:0,63,629:..	0/0:23:23,0:50:0,69,689:..	0/0:16:16,0:48:0,63,629:..	0/0:25:25,0:48:0,78,779:..	0/1:35:19,16:42:42,0,53:..	0/0:19:19,0:50:0,72,719:..	0/0:23:23,0:50:0,72,719:..	0/0:22:22,0:48:0,96,959:..	0/0:25:25,0:50:0,75,749:..	0/0:25:25,0:48:0,75,749:..	0/0:24:24,0:50:0,75,749:..	0/0:24:24,0:50:0,72,719:..	0/0:21:21,0:50:0,66,659:..	0/0:23:23,0:50:0,72,719:..	0/0:22:22,0:48:0,72,719:..	0/0:20:20,0:50:0,75,749:..	0/0:26:26,0:50:0,87,869:..	0/0:24:24,0:50:0,99,989:..	0/0:25:25,0:48:0,78,779:..	seq2
chr1	32823668	chr1_32823668_C_T	C	T	36	AF=0.013889;AQ=36	GT:DP:AD:GQ:PL:RNC	0/0:21:21,0:50:0,63,629:..	0/0:24:24,0:48:0,75,749:..	0/0:20:20,0:48:0,75,749:..	0/0:20:20,0:50:0,60,599:..	0/0:23:23,0:50:0,81,809:..	0/0:24:24,0:50:0,72,719:..	0/0:16:16,0:48:0,51,509:..	0/1:28:17,11:36:36,0,51:..	0/0:23:23,0:39:0,39,629:..	0/0:23:23,0:50:0,69,689:..	0/0:15:15,0:45:0,45,449:..	0/0:20:20,0:48:0,75,749:..	0/0:16:16,0:48:0,54,539:..	0/0:22:22,0:48:0,72,719:..	0/0:16:16,0:48:0,57,569:..	0/0:21:21,0:48:0,75,749:..	0/0:26:26,0:50:0,105,1049:..	0/0:17:17,0:50:0,54,539:..	0/0:20:20,0:48:0,60,599:..	0/0:25:25,0:50:0,87,869:..	0/0:16:16,0:48:0,60,599:..	0/0:24:24,0:48:0,75,749:..	0/0:21:21,0:48:0,66,659:..	0/0:17:17,0:48:0,99,989:..	0/0:22:22,0:48:0,72,719:..	0/0:26:26,0:50:0,81,809:..	0/0:24:24,0:48:0,72,719:..	0/0:22:22,0:50:0,78,779:..	0/0:16:16,0:48:0,69,689:..	0/0:22:22,0:50:0,72,719:..	0/0:20:20,0:50:0,75,749:..	0/0:22:22,0:48:0,69,689:..	0/0:24:24,0:48:0,99,989:..	0/0:19:19,0:48:0,63,629:..	0/0:20:20,0:48:0,63,629:..	0/0:25:25,0:50:0,75,749:..	seq2
chr1	32982855	chr1_32982855_C_T	C	T	37	AF=0.013889;AQ=37	GT:DP:AD:GQ:PL:RNC	0/0:20:20,0:50:0,75,749:..	0/0:21:21,0:50:0,69,689:..	0/0:20:20,0:50:0,69,689:..	0/0:25:25,0:50:0,99,989:..	0/0:19:19,0:48:0,66,659:..	0/0:20:20,0:48:0,72,719:..	0/0:16:16,0:48:0,72,719:..	0/0:23:23,0:50:0,90,899:..	0/0:16:16,0:48:0,48,479:..	0/1:30:17,13:37:37,0,52:..	0/0:23:23,0:48:0,75,749:..	0/0:27:27,0:48:0,105,1049:..	0/0:23:23,0:50:0,72,719:..	0/0:16:16,0:48:0,75,749:..	0/0:23:23,0:50:0,78,779:..	0/0:16:16,0:48:0,48,479:..	0/0:23:23,0:50:0,84,839:..	0/0:20:20,0:50:0,72,719:..	0/0:16:16,0:48:0,48,479:..	0/0:21:21,0:50:0,63,629:..	0/0:23:23,0:50:0,69,689:..	0/0:28:28,0:50:0,105,1049:..	0/0:14:14,0:42:0,45,449:..	0/0:22:22,0:50:0,72,719:..	0/0:20:20,0:50:0,66,659:..	0/0:21:21,0:50:0,72,719:..	0/0:26:26,0:50:0,93,929:..	0/0:17:17,0:50:0,60,599:..	0/0:19:19,0:50:0,72,719:..	0/0:19:19,0:50:0,72,719:..	0/0:20:20,0:48:0,81,809:..	0/0:16:16,0:48:0,54,539:..	0/0:16:16,0:48:0,69,689:..	0/0:22:22,0:50:0,78,779:..	0/0:13:13,0:39:0,39,389:..	0/0:17:17,0:50:0,63,629:..	seq2
chr1	33959964	chr1_33959964_G_A	G	A	44	AF=0.013889;AQ=44	GT:DP:AD:GQ:PL:RNC	0/0:19:19,0:50:0,57,569:..	0/0:16:16,0:48:0,51,509:..	0/0:24:24,0:50:0,78,779:..	0/0:28:28,0:50:0,87,869:..	0/0:20:20,0:48:0,63,629:..	0/0:24:24,0:50:0,75,749:..	0/0:25:25,0:48:0,75,749:..	0/0:23:23,0:48:0,75,749:..	0/0:16:16,0:48:0,57,569:..	0/0:22:22,0:50:0,69,689:..	0/0:16:16,0:48:0,48,479:..	0/1:40:18,22:44:44,0,54:..	0/0:16:16,0:48:0,75,749:..	0/0:25:25,0:50:0,78,779:..	0/0:18:18,0:50:0,54,539:..	0/0:18:18,0:50:0,63,629:..	0/0:25:25,0:50:0,75,749:..	0/0:19:19,0:48:0,69,689:..	0/0:22:22,0:48:0,75,749:..	0/0:19:19,0:48:0,66,659:..	0/0:23:23,0:48:0,72,719:..	0/0:28:28,0:50:0,87,869:..	0/0:25:25,0:48:0,75,749:..	0/0:24:24,0:50:0,81,809:..	0/0:23:23,0:50:0,69,689:..	0/0:20:20,0:50:0,72,719:..	0/0:21:21,0:50:0,96,959:..	0/0:23:23,0:48:0,72,719:..	0/0:17:17,0:50:0,51,509:..	0/0:17:17,0:50:0,54,539:..	0/0:20:20,0:50:0,78,779:..	0/0:18:18,0:50:0,66,659:..	0/0:25:25,0:50:0,75,749:..	0/0:21:21,0:50:0,66,659:..	0/0:24:24,0:48:0,75,749:..	0/0:19:19,0:48:0,60,839:..	seq2
chr1	37761031	chr1_37761031_A_C	A	C	17	AF=0.013889;AQ=17	GT:DP:AD:GQ:PL:RNC	0/0:28:28,0:50:0,102,1019:..	0/0:24:24,0:50:0,72,719:..	0/0:29:29,0:50:0,123,1229:..	0/0:25:25,0:50:0,87,869:..	0/0:17:17,0:50:0,63,629:..	0/0:31:31,0:48:0,129,1289:..	0/0:24:24,0:48:0,75,749:..	0/0:32:32,0:50:0,102,1019:..	0/0:21:21,0:50:0,66,659:..	0/0:28:28,0:50:0,102,1019:..	0/0:24:24,0:48:0,72,719:..	0/0:30:30,0:50:0,102,1019:..	0/0:20:20,0:50:0,63,629:..	0/0:23:23,0:50:0,78,779:..	0/0:23:23,0:50:0,105,1049:..	0/0:19:19,0:50:0,75,749:..	0/0:26:26,0:48:0,87,869:..	0/0:19:19,0:50:0,69,689:..	0/0:19:19,0:50:0,63,629:..	0/0:27:27,0:50:0,93,929:..	0/0:23:23,0:48:0,72,719:..	0/0:36:36,0:50:0,123,1229:..	0/0:18:18,0:50:0,57,569:..	0/0:35:35,0:50:0,96,1199:..	0/0:20:20,0:48:0,84,839:..	0/0:23:23,0:48:0,78,779:..	0/0:30:30,0:48:0,102,1019:..	0/0:27:27,0:50:0,114,1139:..	0/0:23:23,0:50:0,75,749:..	0/0:18:18,0:50:0,63,629:..	0/0:32:32,0:50:0,105,1049:..	0/0:25:25,0:50:0,87,869:..	0/0:26:26,0:50:0,78,779:..	0/1:35:24,10:18:17,0,43:..	0/0:21:21,0:50:0,63,629:..	0/0:32:32,0:50:0,102,1019:..	seq2
chr1	40062579	chr1_40062579_G_C	G	C	43	AF=0.013889;AQ=43	GT:DP:AD:GQ:PL:RNC	0/0:21:21,0:48:0,75,749:..	0/0:23:23,0:48:0,84,839:..	0/0:26:26,0:50:0,90,899:..	0/0:23:23,0:50:0,69,689:..	0/0:26:26,0:50:0,78,779:..	0/0:25:25,0:50:0,84,839:..	0/0:21:21,0:50:0,75,749:..	0/0:23:23,0:50:0,75,749:..	0/0:17:17,0:48:0,66,659:..	0/0:19:19,0:50:0,57,569:..	0/0:25:25,0:50:0,75,749:..	0/0:25:25,0:48:0,84,839:..	0/0:23:23,0:48:0,96,959:..	0/0:24:24,0:50:0,96,959:..	0/0:25:25,0:50:0,99,989:..	0/0:22:22,0:48:0,72,719:..	0/0:25:25,0:50:0,111,1109:..	0/0:17:17,0:50:0,69,689:..	0/0:24:24,0:50:0,72,719:..	0/0:18:18,0:50:0,75,749:..	0/0:22:22,0:48:0,78,779:..	0/0:27:27,0:50:0,105,1049:..	0/0:19:19,0:50:0,63,629:..	0/0:28:28,0:50:0,96,959:..	0/0:24:24,0:50:0,72,719:..	0/0:23:23,0:48:0,72,719:..	0/1:47:25,22:43:43,0,56:..	0/0:24:24,0:48:0,75,749:..	0/0:24:24,0:50:0,99,989:..	0/0:25:25,0:48:0,138,1379:..	0/0:23:23,0:48:0,75,749:..	0/0:16:16,0:48:0,66,659:..	0/0:18:18,0:50:0,69,689:..	0/0:26:26,0:50:0,96,959:..	0/0:17:17,0:50:0,60,599:..	0/0:18:18,0:50:0,63,629:..	seq2
chr1	48456208	chr1_48456208_A_C	A	C	32	AF=0.013889;AQ=32	GT:DP:AD:GQ:PL:RNC	0/0:9:9,0:27:0,27,269:..	0/0:19:19,0:50:0,57,569:..	0/0:15:15,0:45:0,45,449:..	0/0:19:19,0:50:0,57,569:..	0/1:17:11,6:32:32,0,50:..	0/0:18:18,0:50:0,54,539:..	0/0:18:18,0:50:0,54,539:..	0/0:19:19,0:1:2,0,452:II	0/0:14:14,0:42:0,42,419:..	0/0:21:21,0:50:0,63,629:..	0/0:19:19,0:50:0,57,569:..	0/0:23:23,0:50:0,69,689:..	0/0:22:22,0:50:0,66,659:..	0/0:14:14,0:42:0,42,419:..	0/0:15:15,0:45:0,45,449:..	0/0:23:23,0:50:0,69,689:..	0/0:20:20,0:50:0,60,599:..	0/0:23:23,0:50:0,69,689:..	0/0:13:13,0:39:0,39,389:..	0/0:20:20,0:50:0,63,629:..	0/0:18:18,0:24:0,24,479:..	0/0:30:30,0:50:0,60,839:..	0/0:9:9,0:27:0,30,299:..	0/0:25:25,0:48:0,75,749:..	0/0:14:14,0:42:0,42,419:..	0/0:14:14,0:42:0,45,449:..	0/0:18:18,0:50:0,54,539:..	0/0:16:16,0:48:0,54,539:..	0/0:23:23,0:50:0,69,689:..	0/0:16:16,0:18:0,18,419:..	0/0:12:12,0:36:0,36,359:..	0/0:15:15,0:45:0,45,449:..	0/0:14:14,0:42:0,42,419:..	0/0:23:23,0:50:0,69,689:..	0/0:16:16,0:48:0,48,479:..	0/0:12:12,0:36:0,36,359:..	seq2
chr1	55478969	chr1_55478969_T_G	T	G	36	AF=0.013889;AQ=36	GT:DP:AD:GQ:PL:RNC	0/0:23:23,0:50:0,72,719:..	0/0:23:23,0:50:0,69,689:..	0/0:14:14,0:42:0,42,419:..	0/0:22:22,0:48:0,66,659:..	0/0:23:23,0:50:0,72,719:..	0/0:24:24,0:50:0,102,1019:..	0/0:16:16,0:48:0,54,539:..	0/0:14:14,0:42:0,42,419:..	0/0:23:23,0:50:0,72,719:..	0/0:19:19,0:50:0,75,749:..	0/0:18:18,0:50:0,60,599:..	0/0:25:25,0:48:0,51,749:..	0/0:21:21,0:33:0,33,569:..	0/0:20:20,0:50:0,66,659:..	0/0:24:24,0:50:0,75,749:..	0/0:21:21,0:50:0,72,719:..	0/0:19:19,0:50:0,57,569:..	0/0:10:10,0:30:0,30,299:..	0/0:18:18,0:50:0,54,539:..	0/0:23:23,0:50:0,72,719:..	0/0:17:17,0:50:0,51,509:..	0/0:25:25,0:48:0,75,749:..	0/1:9:4,5:36:36,0,46:..	0/0:25:25,0:48:0,48,719:..	0/0:22:22,0:50:0,69,689:..	0/0:24:24,0:48:0,81,809:..	0/0:25:25,0:48:0,78,779:..	0/0:20:20,0:50:0,63,629:..	0/0:15:15,0:15:0,15,389:..	0/0:18:18,0:50:0,63,629:..	0/0:23:23,0:48:0,75,749:..	0/0:28:28,0:50:0,90,899:..	0/0:26:26,0:50:0,87,869:..	0/0:16:16,0:48:0,48,479:..	0/0:20:20,0:50:0,60,599:..	0/0:22:22,0:50:0,66,659:..	seq2
chr1	58906643	chr1_58906643_A_T	A	T	41	AF=0.013889;AQ=41	GT:DP:AD:GQ:PL:RNC	0/0:23:23,0:48:0,69,689:..	0/0:24:24,0:48:0,72,719:..	0/0:19:19,0:50:0,69,689:..	0/0:20:20,0:50:0,96,959:..	0/0:30:30,0:50:0,105,1049:..	0/0:21:21,0:50:0,66,659:..	0/0:29:29,0:50:0,99,989:..	0/0:16:16,0:48:0,60,599:..	0/0:24:24,0:50:0,90,899:..	0/0:23:23,0:48:0,69,689:..	0/0:20:20,0:48:0,60,599:..	0/0:23:23,0:50:0,75,749:..	0/0:18:18,0:50:0,72,719:..	0/0:24:24,0:50:0,72,719:..	0/0:25:25,0:48:0,105,1049:..	0/0:17:17,0:50:0,57,569:..	0/0:16:16,0:48:0,99,989:..	0/0:24:24,0:50:0,75,749:..	0/0:29:29,0:50:0,87,869:..	0/1:27:13,14:41:41,0,51:..	0/0:16:16,0:48:0,48,479:..	0/0:23:23,0:50:0,96,959:..	0/0:24:24,0:48:0,75,749:..	0/0:22:22,0:48:0,108,1079:..	0/0:25:25,0:48:0,102,1019:..	0/0:19:19,0:50:0,66,659:..	0/0:23:23,0:50:0,78,779:..	0/0:20:20,0:50:0,78,779:..	0/0:23:23,0:48:0,81,809:..	0/0:23:23,0:48:0,93,929:..	0/0:22:22,0:50:0,66,659:..	0/0:16:16,0:48:0,48,479:..	0/0:21:21,0:48:0,87,869:..	0/0:22:22,0:50:0,84,839:..	0/0:23:23,0:48:0,72,719:..	0/0:25:25,0:50:0,114,1139:..	seq2
chr1	59325620	chr1_59325620_G_T	G	T	16	AF=0.013889;AQ=16	GT:DP:AD:GQ:PL:RNC	0/0:20:20,0:50:0,105,1049:..	0/0:16:16,0:48:0,48,479:..	0/0:22:22,0:50:0,90,899:..	0/0:16:16,0:48:0,48,479:..	0/0:20:20,0:50:0,75,749:..	0/0:21:21,0:48:0,81,809:..	0/0:21:21,0:48:0,78,779:..	0/0:22:22,0:50:0,69,689:..	0/0:16:16,0:48:0,51,509:..	0/0:23:23,0:48:0,72,719:..	0/0:21:21,0:50:0,69,689:..	0/0:17:17,0:50:0,63,629:..	0/0:20:20,0:48:0,75,749:..	0/0:20:20,0:48:0,75,749:..	0/0:16:16,0:48:0,60,599:..	0/0:19:19,0:48:0,84,839:..	0/0:23:23,0:50:0,78,779:..	0/0:16:16,0:48:0,69,689:..	0/0:17:17,0:50:0,102,1019:..	0/0:16:16,0:48:0,48,479:..	0/0:21:21,0:50:0,72,719:..	0/0:23:23,0:48:0,75,749:..	0/1:22:17,5:17:16,0,44:..	0/0:25:25,0:50:0,75,749:..	0/0:24:24,0:50:0,90,899:..	0/0:16:16,0:48:0,75,749:..	0/0:22:22,0:48:0,75,749:..	0/0:19:19,0:50:0,63,629:..	0/0:20:20,0:50:0,75,749:..	0/0:23:23,0:50:0,75,749:..	0/0:21:21,0:50:0,102,1019:..	0/0:19:19,0:50:0,57,569:..	0/0:22:22,0:50:0,75,749:..	0/0:16:16,0:48:0,96,959:..	0/0:22:22,0:50:0,69,689:..	0/0:25:25,0:48:0,99,989:..	seq2
chr1	62093109	chr1_62093109_G_A	G	A	38	AF=0.013889;AQ=38	GT:DP:AD:GQ:PL:RNC	0/0:18:18,0:50:0,63,629:..	0/0:19:19,0:50:0,69,689:..	0/0:23:23,0:48:0,78,779:..	0/0:19:19,0:48:0,63,629:..	0/0:24:24,0:50:0,75,749:..	0/0:24:24,0:50:0,87,869:..	0/0:19:19,0:48:0,75,749:..	0/0:25:25,0:50:0,90,899:..	0/0:16:16,0:48:0,48,479:..	0/0:20:20,0:48:0,81,809:..	0/0:23:23,0:50:0,96,959:..	0/0:21:21,0:48:0,105,1049:..	0/0:21:21,0:50:0,63,629:..	0/0:21:21,0:48:0,75,749:..	0/0:25:25,0:50:0,87,869:..	0/0:17:17,0:50:0,57,569:..	0/0:25:25,0:50:0,102,1019:..	0/0:16:16,0:48:0,66,659:..	0/0:20:20,0:50:0,63,629:..	0/0:23:23,0:48:0,93,929:..	0/0:22:22,0:50:0,66,659:..	0/0:29:29,0:50:0,135,1349:..	0/0:29:29,0:50:0,117,1169:..	0/0:24:24,0:48:0,126,1259:..	0/0:24:24,0:50:0,72,719:..	0/0:21:21,0:48:0,75,749:..	0/0:21:21,0:50:0,87,869:..	0/0:17:17,0:50:0,105,1049:..	0/0:21:21,0:48:0,78,779:..	0/0:18:18,0:50:0,69,689:..	0/0:25:25,0:50:0,135,1349:..	0/0:23:23,0:48:0,96,959:..	0/0:18:18,0:50:0,66,659:..	0/1:33:19,14:38:38,0,52:..	0/0:17:17,0:50:0,81,809:..	0/0:28:28,0:50:0,84,839:..	seq2
chr1	65428679	chr1_65428679_C_T	C	T	43	AF=0.013889;AQ=43	GT:DP:AD:GQ:PL:RNC	0/0:23:23,0:50:0,75,749:..	0/0:21:21,0:50:0,63,629:..	0/0:24:24,0:50:0,87,869:..	0/0:26:26,0:48:0,57,809:..	0/0:28:28,0:50:0,117,1169:..	0/0:24:24,0:48:0,51,749:..	0/0:19:19,0:50:0,60,599:..	0/0:14:14,0:42:0,45,449:..	0/0:25:25,0:50:0,75,749:..	0/0:23:23,0:50:0,96,959:..	0/0:22:22,0:48:0,66,659:..	0/0:24:24,0:50:0,72,719:..	0/0:14:14,0:42:0,42,419:..	0/0:23:23,0:50:0,69,689:..	0/0:20:20,0:50:0,60,599:..	0/0:24:24,0:48:0,75,749:..	0/0:17:17,0:50:0,51,509:..	0/0:23:23,0:50:0,69,689:..	0/0:18:18,0:50:0,69,689:..	0/0:23:23,0:50:0,72,719:..	0/0:20:20,0:50:0,66,659:..	0/0:25:25,0:48:0,87,869:..	0/0:19:19,0:50:0,57,569:..	0/0:30:30,0:50:0,90,899:..	0/0:23:23,0:48:0,75,749:..	0/0:14:14,0:42:0,45,449:..	0/1:31:14,16:43:43,0,51:..	0/0:14:14,0:42:0,42,419:..	0/0:22:22,0:48:0,75,989:..	0/0:19:19,0:50:0,78,779:..	0/0:21:21,0:50:0,72,719:..	0/0:18:18,0:50:0,66,659:..	0/0:21:21,0:50:0,66,659:..	0/0:23:23,0:48:0,75,749:..	0/0:22:22,0:48:0,75,749:..	0/0:24:24,0:48:0,78,779:..	seq2
chr1	67059991	chr1_67059991_C_T	C	T	35	AF=0.013889;AQ=35	GT:DP:AD:GQ:PL:RNC	0/0:24:24,0:50:0,75,749:..	0/0:25:25,0:50:0,75,749:..	0/0:26:26,0:50:0,84,839:..	0/0:23:23,0:48:0,84,839:..	0/0:21:21,0:50:0,63,629:..	0/0:23:23,0:50:0,69,689:..	0/0:23:23,0:48:0,69,689:..	0/0:20:20,0:50:0,66,659:..	0/0:30:30,0:50:0,96,959:..	0/0:27:27,0:50:0,60,1079:..	0/0:22:22,0:50:0,66,659:..	0/0:25:25,0:50:0,75,749:..	0/0:19:19,0:50:0,63,629:..	0/0:24:24,0:48:0,78,779:..	0/0:25:25,0:48:0,75,749:..	0/1:28:17,11:36:35,0,52:..	0/0:28:28,0:50:0,84,839:..	0/0:16:16,0:48:0,57,569:..	0/0:28:28,0:50:0,66,899:..	0/0:23:23,0:50:0,69,689:..	0/0:16:16,0:48:0,48,479:..	0/0:26:26,0:50:0,84,839:..	0/0:24:24,0:50:0,78,779:..	0/0:21:21,0:48:0,66,659:..	0/0:22:22,0:50:0,78,779:..	0/0:25:25,0:48:0,75,749:..	0/0:24:24,0:48:0,48,719:..	0/0:16:16,0:48:0,69,689:..	0/0:21:21,0:50:0,63,629:..	0/0:23:23,0:50:0,69,689:..	0/0:27:27,0:50:0,69,929:..	0/0:25:25,0:48:0,75,749:..	0/0:29:29,0:50:0,90,899:..	0/0:18:18,0:50:0,57,569:..	0/0:18:18,0:50:0,57,569:..	0/0:22:22,0:48:0,90,899:..	seq2
chr1	70757010	chr1_70757010_G_T	G	T	39	AF=0.013889;AQ=39	GT:DP:AD:GQ:PL:RNC	0/0:22:22,0:50:0,81,809:..	0/0:24:24,0:50:0,75,749:..	0/0:21:21,0:50:0,108,1079:..	0/0:16:16,0:48:0,87,869:..	0/0:27:27,0:48:0,81,809:..	0/1:24:11,13:39:39,0,49:..	0/0:18:18,0:50:0,57,569:..	0/0:16:16,0:48:0,108,1079:..	0/0:24:24,0:50:0,72,719:..	0/0:19:19,0:50:0,75,749:..	0/0:21:21,0:50:0,66,659:..	0/0:29:29,0:50:0,102,1019:..	0/0:20:20,0:50:0,72,719:..	0/0:23:23,0:50:0,87,869:..	0/0:30:30,0:50:0,99,989:..	0/0:21:21,0:50:0,66,659:..	0/0:25:25,0:50:0,75,749:..	0/0:16:16,0:48:0,51,509:..	0/0:23:23,0:50:0,99,989:..	0/0:21:21,0:50:0,114,1139:..	0/0:26:26,0:50:0,87,869:..	0/0:27:27,0:50:0,117,1169:..	0/0:25:25,0:50:0,75,749:..	0/0:31:31,0:50:0,96,959:..	0/0:24:24,0:48:0,72,719:..	0/0:24:24,0:48:0,75,749:..	0/0:24:24,0:50:0,123,1229:..	0/0:22:22,0:50:0,69,689:..	0/0:16:16,0:48:0,78,779:..	0/0:20:20,0:50:0,75,749:..	0/0:17:17,0:48:0,105,1049:..	0/0:21:21,0:50:0,96,959:..	0/0:19:19,0:50:0,93,929:..	0/0:21:21,0:50:0,114,1139:..	0/0:26:26,0:50:0,84,839:..	0/0:24:24,0:50:0,90,899:..	seq2
chr1	80107083	chr1_80107083_T_G	T	G	30	AF=0.013889;AQ=30	GT:DP:AD:GQ:PL:RNC	0/0:19:19,0:48:0,93,929:..	0/0:19:19,0:50:0,90,899:..	0/0:25:25,0:48:0,99,989:..	0/0:21:21,0:50:0,72,719:..	0/0:28:28,0:50:0,117,1169:..	0/0:21:21,0:50:0,78,779:..	0/0:14:14,0:42:0,45,449:..	0/0:24:24,0:48:0,84,839:..	0/0:24:24,0:50:0,87,869:..	0/0:22:22,0:48:0,69,689:..	0/1:33:21,12:31:30,0,48:..	0/0:29:29,0:50:0,117,1169:..	0/0:24:24,0:50:0,72,719:..	0/0:23:23,0:50:0,72,719:..	0/0:24:24,0:50:0,87,869:..	0/0:17:17,0:50:0,87,869:..	0/0:29:29,0:50:0,63,869:..	0/0:16:16,0:48:0,54,539:..	0/0:16:16,0:48:0,48,479:..	0/0:21:21,0:50:0,75,749:..	0/0:22:22,0:50:0,93,929:..	0/0:39:39,0:50:0,135,1349:..	0/0:27:27,0:50:0,81,809:..	0/0:31:31,0:50:0,96,959:..	0/0:17:17,0:50:0,75,749:..	0/0:21:21,0:50:0,87,869:..	0/0:29:29,0:50:0,105,1049:..	0/0:18:18,0:50:0,87,869:..	0/0:21:21,0:50:0,102,1019:..	0/0:20:20,0:50:0,90,899:..	0/0:16:16,0:48:0,87,869:..	0/0:21:21,0:50:0,78,779:..	0/0:21:21,0:50:0,78,779:..	0/0:26:26,0:48:0,108,1079:..	0/0:12:12,0:36:0,39,389:..	0/0:22:22,0:50:0,72,719:..	seq2
chr1	90207097	chr1_90207097_C_T	C	T	44	AF=0.013889;AQ=44	GT:DP:AD:GQ:PL:RNC	0/0:25:25,0:50:0,93,929:..	0/0:19:19,0:48:0,75,749:..	0/0:24:24,0:50:0,96,959:..	0/0:27:27,0:50:0,93,929:..	0/0:32:32,0:50:0,111,1109:..	0/0:27:27,0:50:0,132,1319:..	0/0:27:27,0:50:0,90,899:..	0/0:24:24,0:48:0,78,779:..	0/0:23:23,0:48:0,108,1079:..	0/0:21:21,0:50:0,81,809:..	0/0:23:23,0:50:0,108,1079:..	0/0:29:29,0:50:0,123,1229:..	0/0:21:21,0:48:0,81,809:..	0/0:18:18,0:50:0,108,1079:..	0/0:24:24,0:48:0,129,1289:..	0/0:12:12,0:36:0,36,359:..	0/0:21:21,0:48:0,96,959:..	0/0:21:21,0:48:0,96,959:..	0/0:17:17,0:50:0,66,659:..	0/0:22:22,0:50:0,102,1019:..	0/0:20:20,0:50:0,69,689:..	0/1:39:16,23:44:44,0,51:..	0/0:17:17,0:50:0,69,689:..	0/0:22:22,0:50:0,102,1019:..	0/0:17:17,0:50:0,57,569:..	0/0:25:25,0:50:0,84,839:..	0/0:23:23,0:48:0,96,959:..	0/0:18:18,0:50:0,57,569:..	0/0:26:26,0:48:0,87,869:..	0/0:26:26,0:50:0,81,809:..	0/0:16:16,0:48:0,84,839:..	0/0:27:27,0:50:0,93,929:..	0/0:24:24,0:50:0,117,1169:..	0/0:23:23,0:50:0,117,1169:..	0/0:19:19,0:50:0,72,719:..	0/0:21:21,0:50:0,165,1649:..	seq2
chr1	98949260	chr1_98949260_A_G	A	G	38	AF=0.013889;AQ=38	GT:DP:AD:GQ:PL:RNC	0/0:23:23,0:50:0,75,749:..	0/0:19:19,0:50:0,75,749:..	0/0:23:23,0:50:0,72,719:..	0/0:24:24,0:48:0,102,1019:..	0/0:25:25,0:50:0,78,779:..	0/0:22:22,0:48:0,66,659:..	0/0:17:17,0:50:0,60,599:..	0/0:21:21,0:50:0,63,629:..	0/0:17:17,0:50:0,54,539:..	0/0:19:19,0:50:0,69,689:..	0/0:21:21,0:50:0,66,659:..	0/0:17:17,0:50:0,57,569:..	0/0:18:18,0:50:0,63,629:..	0/0:23:23,0:48:0,81,809:..	0/0:22:22,0:48:0,69,689:..	0/0:20:20,0:50:0,63,629:..	0/0:23:23,0:50:0,69,689:..	0/0:25:25,0:50:0,75,749:..	0/0:22:22,0:48:0,66,659:..	0/0:24:24,0:50:0,72,719:..	0/0:19:19,0:50:0,60,599:..	0/1:28:14,13:38:38,0,52:..	0/0:20:20,0:50:0,72,719:..	0/0:27:27,0:50:0,84,839:..	0/0:20:20,0:48:0,60,599:..	0/0:21:21,0:50:0,75,749:..	0/0:25:25,0:48:0,75,749:..	0/0:23:23,0:50:0,69,689:..	0/0:24:24,0:50:0,72,719:..	0/0:21:21,0:48:0,63,629:..	0/0:23:23,0:48:0,63,869:..	0/0:16:16,0:48:0,60,599:..	0/0:24:24,0:48:0,75,749:..	0/0:16:16,0:48:0,54,539:..	0/0:16:16,0:48:0,48,479:..	0/0:22:22,0:50:0,66,659:..	seq2
chr1	99143229	chr1_99143229_G_C	G	C	34	AF=0.013889;AQ=34	GT:DP:AD:GQ:PL:RNC	0/0:27:27,0:50:0,81,809:..	0/0:24:24,0:50:0,72,719:..	0/0:18:18,0:50:0,54,539:..	0/1:23:11,12:34:34,0,49:..	0/0:25:25,0:48:0,75,749:..	0/0:23:23,0:50:0,69,689:..	0/0:17:17,0:50:0,51,509:..	0/0:16:16,0:48:0,48,479:..	0/0:21:21,0:50:0,75,989:..	0/0:27:27,0:50:0,81,809:..	0/0:24:24,0:50:0,72,719:..	0/0:23:23,0:50:0,72,719:..	0/0:25:25,0:48:0,75,749:..	0/0:23:23,0:50:0,69,689:..	0/0:28:28,0:50:0,84,839:..	0/0:16:16,0:48:0,48,479:..	0/0:19:19,0:50:0,57,569:..	0/0:21:21,0:50:0,63,629:..	0/0:19:19,0:50:0,57,569:..	0/0:16:16,0:48:0,69,689:..	0/0:26:26,0:48:0,48,719:..	0/0:18:18,0:50:0,63,629:..	0/0:28:28,0:50:0,96,959:..	0/0:23:23,0:50:0,72,719:..	0/0:26:26,0:48:0,84,839:..	0/0:28:28,0:50:0,87,869:..	0/0:23:23,0:48:0,75,749:..	0/0:28:28,0:50:0,84,839:..	0/0:27:27,0:50:0,84,839:..	0/0:31:27,4:5:0,3,29:II	0/0:28:28,0:50:0,84,839:..	0/0:25:25,0:48:0,75,749:..	0/0:22:22,0:50:0,66,659:..	0/0:16:16,0:48:0,48,479:..	0/0:19:19,0:50:0,60,599:..	0/0:19:19,0:50:0,57,569:..	seq2
chr1	99249495	chr1_99249495_G_A	G	A	43	AF=0.013889;AQ=43	GT:DP:AD:GQ:PL:RNC	0/0:23:23,0:50:0,72,719:..	0/0:16:16,0:48:0,48,479:..	0/0:21:21,0:48:0,66,659:..	0/0:19:19,0:50:0,69,689:..	0/0:21:21,0:50:0,69,689:..	0/0:18:18,0:50:0,66,659:..	0/0:24:24,0:50:0,75,749:..	0/0:18:18,0:48:0,57,569:..	0/0:20:20,0:50:0,63,629:..	0/0:19:19,0:50:0,105,1049:..	0/0:23:23,0:50:0,75,749:..	0/0:16:16,0:48:0,54,539:..	0/0:20:20,0:50:0,69,689:..	0/0:22:22,0:48:0,90,899:..	0/0:23:23,0:50:0,75,749:..	0/0:18:18,0:48:0,57,569:..	0/0:16:16,0:48:0,69,689:..	0/0:21:21,0:50:0,69,689:..	0/0:16:16,0:48:0,48,479:..	0/0:24:24,0:50:0,87,869:..	0/0:21:21,0:48:0,66,659:..	0/0:19:19,0:50:0,63,629:..	0/0:23:23,0:50:0,72,719:..	0/0:25:25,0:48:0,78,779:..	0/0:22:22,0:50:0,78,779:..	0/0:20:20,0:48:0,60,599:..	0/0:19:19,0:50:0,93,929:..	0/1:35:15,20:43:43,0,51:..	0/0:23:23,0:48:0,72,719:..	0/0:20:20,0:48:0,60,599:..	0/0:21:21,0:48:0,63,629:..	0/0:16:16,0:48:0,48,479:..	0/0:16:16,0:48:0,66,659:..	0/0:23:23,0:48:0,75,749:..	0/0:19:19,0:50:0,117,1169:..	0/0:22:22,0:48:0,75,749:..	seq2
chr1	112126891	chr1_112126891_G_A	G	A	46	AF=0.013889;AQ=46	GT:DP:AD:GQ:PL:RNC	0/0:21:21,0:50:0,63,629:..	0/0:17:17,0:50:0,66,659:..	0/0:29:29,0:50:0,99,989:..	0/0:21:21,0:50:0,72,719:..	0/0:21:21,0:48:0,75,749:..	0/0:22:22,0:50:0,69,689:..	0/0:27:27,0:50:0,93,929:..	0/0:18:18,0:50:0,54,539:..	0/0:23:23,0:48:0,81,809:..	0/0:32:32,0:50:0,105,1049:..	0/0:17:17,0:50:0,51,509:..	0/0:19:19,0:50:0,72,719:..	0/0:14:14,0:42:0,45,449:..	0/0:18:18,0:48:0,60,599:..	0/0:25:25,0:50:0,102,1019:..	0/0:19:19,0:48:0,69,689:..	0/0:22:22,0:50:0,72,719:..	0/0:19:19,0:50:0,60,599:..	0/0:18:18,0:50:0,84,839:..	0/1:32:13,19:45:46,0,53:..	0/0:18:18,0:50:0,60,599:..	0/0:24:24,0:50:0,72,719:..	0/0:23:23,0:50:0,99,989:..	0/0:20:20,0:48:0,72,719:..	0/0:23:23,0:48:0,72,719:..	0/0:23:23,0:48:0,69,689:..	0/0:23:23,0:50:0,111,1109:..	0/0:24:24,0:50:0,75,749:..	0/0:27:27,0:50:0,99,989:..	0/0:26:26,0:50:0,90,899:..	0/0:26:26,0:50:0,54,779:..	0/0:23:23,0:50:0,75,749:..	0/0:24:24,0:50:0,105,1049:..	0/0:21:21,0:48:0,63,629:..	0/0:26:26,0:50:0,93,929:..	0/0:24:24,0:50:0,78,779:..	seq2
chr1	116689014	chr1_116689014_A_G	A	G	32	AF=0.013889;AQ=32	GT:DP:AD:GQ:PL:RNC	0/0:22:22,0:50:0,72,719:..	0/0:15:15,0:45:0,45,449:..	0/0:15:15,0:45:0,45,449:..	0/0:22:22,0:50:0,66,659:..	0/0:19:19,0:50:0,57,569:..	0/0:20:20,0:50:0,60,599:..	0/1:28:18,10:32:32,0,50:..	0/0:29:29,0:50:0,60,839:..	0/0:24:24,0:50:0,72,719:..	0/0:16:16,0:48:0,48,479:..	0/0:19:19,0:50:0,60,599:..	0/0:18:18,0:50:0,57,569:..	0/0:11:11,0:33:0,33,329:..	0/0:20:20,0:50:0,60,599:..	0/0:25:25,0:48:0,48,719:..	0/0:23:23,0:50:0,69,689:..	0/0:27:27,0:50:0,81,809:..	0/0:12:12,0:36:0,36,359:..	0/0:19:19,0:50:0,60,599:..	0/0:29:29,0:50:0,87,869:..	0/0:20:20,0:50:0,66,659:..	0/0:35:35,0:50:0,75,989:..	0/0:13:13,0:39:0,39,389:..	0/0:27:27,0:50:0,84,839:..	0/0:22:22,0:50:0,66,659:..	0/0:14:14,0:42:0,42,419:..	0/0:27:27,0:50:0,81,809:..	0/0:18:18,0:50:0,54,539:..	0/0:16:16,0:48:0,48,479:..	0/0:14:14,0:42:0,42,419:..	0/0:27:27,0:50:0,84,839:..	0/0:21:21,0:50:0,63,629:..	0/0:17:17,0:50:0,51,509:..	0/0:20:20,0:50:0,66,659:..	0/0:18:18,0:50:0,54,539:..	0/0:31:31,0:50:0,93,929:..	seq2
chr1	117022407	chr1_117022407_G_A	G	A	22	AF=0.013889;AQ=22	GT:DP:AD:GQ:PL:RNC	0/0:24:24,0:50:0,72,719:..	0/0:32:32,0:50:0,96,959:..	0/0:32:32,0:50:0,102,1019:..	0/0:26:26,0:50:0,78,779:..	0/0:32:32,0:50:0,96,959:..	0/0:32:32,0:50:0,99,989:..	0/0:27:27,0:50:0,81,809:..	0/0:18:18,0:24:0,24,479:..	0/0:28:28,0:50:0,84,839:..	0/0:31:31,0:50:0,96,959:..	0/0:29:29,0:50:0,87,869:..	0/1:27:23,4:22:22,0,48:..	0/0:27:27,0:50:0,81,809:..	0/0:24:24,0:50:0,81,809:..	0/0:34:34,0:50:0,105,1049:..	0/0:16:16,0:48:0,78,779:..	0/0:35:35,0:50:0,108,1079:..	0/0:25:25,0:50:0,84,839:..	0/0:39:39,0:50:0,120,1199:..	0/0:25:25,0:50:0,75,749:..	0/0:24:24,0:48:0,72,719:..	0/0:39:39,0:50:0,117,1169:..	0/0:30:30,0:50:0,60,839:..	0/0:26:26,0:48:0,48,719:..	0/0:39:39,0:50:0,120,1199:..	0/0:20:20,0:50:0,66,659:..	0/0:39:39,0:50:0,117,1169:..	0/0:19:19,0:50:0,57,569:..	0/0:27:27,0:50:0,87,869:..	0/0:30:30,0:50:0,90,899:..	0/0:29:29,0:50:0,111,1109:..	0/0:31:31,0:50:0,93,929:..	0/0:23:23,0:50:0,72,719:..	0/0:38:38,0:50:0,117,1169:..	0/0:22:22,0:50:0,69,689:..	0/0:33:33,0:50:0,102,1019:..	seq2
chr1	119909038	chr1_119909038_T_G	T	G	29	AF=0.013889;AQ=29	GT:DP:AD:GQ:PL:RNC	0/0:25:25,0:15:0,15,629:..	0/0:20:20,0:50:0,60,599:..	0/0:27:27,0:50:0,99,989:..	0/0:30:30,0:30:0,30,779:..	0/1:40:25,15:29:29,0,48:..	0/0:24:24,0:42:0,42,659:..	0/0:17:17,0:21:0,21,449:..	0/0:21:21,0:50:0,63,629:..	0/0:33:33,0:50:0,99,989:..	0/0:22:22,0:36:0,36,599:..	0/0:24:24,0:48:0,75,749:..	0/0:29:29,0:1:2,0,692:II	0/0:23:23,0:50:0,75,749:..	0/0:25:25,0:48:0,78,779:..	0/0:17:17,0:50:0,96,959:..	0/0:32:32,0:7:0,6,779:..	0/0:25:25,0:15:0,15,629:..	0/0:22:22,0:36:0,36,599:..	0/0:25:25,0:15:0,15,629:..	0/0:26:26,0:50:0,90,899:..	0/0:23:23,0:50:0,99,989:..	0/0:24:24,0:42:0,42,659:..	0/0:22:22,0:50:0,69,689:..	0/0:25:25,0:15:0,15,629:..	0/0:28:28,0:50:0,102,1019:..	0/0:26:26,0:18:0,18,659:..	0/0:30:30,0:30:0,30,779:..	0/0:31:31,0:50:0,96,959:..	0/0:17:17,0:50:0,54,539:..	0/0:26:26,0:50:0,78,779:..	0/0:25:25,0:50:0,84,839:..	0/0:32:32,0:7:0,6,779:..	0/0:21:21,0:33:0,33,569:..	0/0:11:11,0:4:0,3,269:..	0/0:24:24,0:48:0,81,809:..	0/0:23:23,0:0:20,0,530:II	seq2
chr1	122843247	chr1_122843247_A_C	A	C	31	AF=0.013889;AQ=31	GT:DP:AD:GQ:PL:RNC	0/0:23:23,0:48:0,87,869:..	0/0:19:19,0:50:0,66,659:..	0/0:20:20,0:50:0,78,779:..	0/0:19:19,0:50:0,69,689:..	0/0:20:20,0:48:0,78,779:..	0/0:23:23,0:50:0,75,749:..	0/0:24:24,0:48:0,87,869:..	0/0:14:14,0:42:0,45,449:..	0/0:16:16,0:48:0,87,869:..	0/0:20:20,0:48:0,75,749:..	0/0:18:18,0:48:0,60,599:..	0/0:18:18,0:50:0,60,599:..	0/0:20:20,0:50:0,69,689:..	0/1:23:14,9:31:31,0,49:..	0/0:17:17,0:48:0,60,599:..	0/0:16:16,0:48:0,48,479:..	0/0:26:26,0:50:0,90,899:..	0/0:16:16,0:48:0,51,509:..	0/0:18:18,0:50:0,75,749:..	0/0:22:22,0:50:0,75,749:..	0/0:19:19,0:48:0,93,929:..	0/0:21:21,0:50:0,63,629:..	0/0:23:23,0:50:0,78,779:..	0/0:23:23,0:48:0,87,869:..	0/0:16:16,0:48:0,48,479:..	0/0:20:20,0:48:0,66,659:..	0/0:23:23,0:48:0,75,749:..	0/0:16:16,0:48:0,72,719:..	0/0:18:18,0:50:0,63,629:..	0/0:21:21,0:50:0,63,629:..	0/0:21:21,0:48:0,81,809:..	0/0:21:21,0:50:0,69,689:..	0/0:22:22,0:48:0,90,899:..	0/0:23:23,0:50:0,75,749:..	0/0:20:20,0:50:0,75,749:..	0/0:18:18,0:48:0,99,989:..	seq2
chr1	123830540	chr1_123830540_C_G	C	G	40	AF=0.013889;AQ=40	GT:DP:AD:GQ:PL:RNC	0/0:24:24,0:50:0,75,749:..	0/0:23:23,0:48:0,72,719:..	0/0:23:23,0:50:0,69,689:..	0/0:19:19,0:50:0,63,629:..	0/0:21:21,0:50:0,93,929:..	0/0:20:20,0:50:0,66,659:..	0/0:18:18,0:50:0,60,599:..	0/0:23:23,0:48:0,72,719:..	0/0:17:17,0:50:0,60,599:..	0/0:23:23,0:48:0,72,719:..	0/0:16:16,0:48:0,48,479:..	0/0:25:25,0:48:0,78,779:..	0/0:15:15,0:45:0,45,449:..	0/0:27:27,0:50:0,87,869:..	0/0:24:24,0:50:0,87,869:..	0/0:22:22,0:48:0,75,749:..	0/0:22:22,0:48:0,66,659:..	0/0:20:20,0:50:0,60,599:..	0/0:20:20,0:48:0,69,689:..	0/0:22:22,0:50:0,69,689:..	0/0:25:25,0:50:0,75,749:..	0/0:24:24,0:50:0,72,719:..	0/0:17:17,0:50:0,51,509:..	0/0:18:18,0:48:0,57,569:..	0/0:22:22,0:48:0,90,899:..	0/0:18:18,0:48:0,69,689:..	0/0:22:22,0:50:0,69,689:..	0/0:19:19,0:50:0,72,719:..	0/0:27:27,0:50:0,81,809:..	0/0:25:25,0:50:0,111,1109:..	0/0:19:19,0:50:0,57,569:..	0/0:18:18,0:50:0,75,749:..	0/0:20:20,0:50:0,63,629:..	0/0:23:23,0:48:0,90,899:..	0/1:19:10,9:40:40,0,57:..	0/0:24:24,0:48:0,72,719:..	seq2
chr1	144933988	chr1_144933988_G_A	G	A	42	AF=0.013889;AQ=42	GT:DP:AD:GQ:PL:RNC	0/0:21:21,0:50:0,72,719:..	0/0:19:19,0:50:0,63,629:..	0/0:26:26,0:50:0,84,839:..	0/1:29:13,16:42:42,0,52:..	0/0:21:21,0:48:0,78,779:..	0/0:16:16,0:48:0,63,629:..	0/0:22:22,0:50:0,78,779:..	0/0:16:16,0:48:0,60,599:..	0/0:15:15,0:45:0,45,449:..	0/0:23:23,0:50:0,69,689:..	0/0:20:20,0:48:0,60,599:..	0/0:23:23,0:50:0,69,689:..	0/0:23:23,0:50:0,72,719:..	0/0:23:23,0:50:0,72,719:..	0/0:16:16,0:48:0,48,479:..	0/0:21:21,0:50:0,63,629:..	0/0:18:18,0:50:0,54,539:..	0/0:16:16,0:48:0,48,479:..	0/0:17:17,0:50:0,60,599:..	0/0:16:16,0:48:0,48,479:..	0/0:16:16,0:48:0,63,629:..	0/0:25:25,0:50:0,75,749:..	0/0:16:16,0:48:0,51,509:..	0/0:24:24,0:48:0,102,1019:..	0/0:18:18,0:50:0,75,749:..	0/0:17:17,0:50:0,51,509:..	0/0:26:26,0:50:0,93,929:..	0/0:17:17,0:50:0,87,869:..	0/0:18:18,0:50:0,54,539:..	0/0:23:23,0:50:0,81,809:..	0/0:27:27,0:50:0,99,989:..	0/0:19:19,0:27:0,30,539:..	0/0:18:18,0:50:0,69,689:..	0/0:16:16,0:48:0,48,479:..	0/0:16:16,0:48:0,48,479:..	0/0:28:28,0:50:0,93,929:..	seq2
chr1	147758619	chr1_147758619_C_G	C	G	39	AF=0.013889;AQ=39	GT:DP:AD:GQ:PL:RNC	0/0:21:21,0:50:0,72,719:..	0/0:18:18,0:50:0,60,599:..	0/0:21:21,0:48:0,93,929:..	0/0:16:16,0:48:0,72,719:..	0/0:23:23,0:50:0,75,749:..	0/0:21:21,0:33:0,33,569:..	0/0:16:16,0:48:0,63,629:..	0/0:23:23,0:50:0,72,719:..	0/0:18:18,0:50:0,63,629:..	0/0:27:27,0:50:0,57,809:..	0/0:25:25,0:48:0,102,1019:..	0/0:24:24,0:48:0,90,899:..	0/0:22:22,0:50:0,90,899:..	0/0:27:27,0:50:0,51,749:..	0/0:23:23,0:50:0,63,869:..	0/0:19:19,0:48:0,84,1079:..	0/0:20:20,0:50:0,99,989:..	0/0:20:20,0:50:0,60,599:..	0/0:22:22,0:48:0,75,749:..	0/0:23:23,0:39:0,39,629:..	0/0:22:22,0:50:0,72,719:..	0/0:24:24,0:48:0,108,1079:..	0/0:20:20,0:48:0,60,599:..	0/0:21:21,0:50:0,81,809:..	0/0:18:18,0:50:0,75,749:..	0/0:23:23,0:50:0,78,779:..	0/0:30:30,0:50:0,117,1169:..	0/0:18:18,0:50:0,57,569:..	0/0:24:24,0:48:0,81,809:..	0/0:21:21,0:50:0,87,869:..	0/0:25:25,0:50:0,78,779:..	0/0:24:24,0:48:0,72,719:..	0/0:24:24,0:50:0,75,749:..	0/1:26:13,13:39:39,0,52:..	0/0:22:22,0:50:0,93,929:..	0/0:24:24,0:50:0,90,1139:..	seq2
chr1	152638646	chr1_152638646_A_C	A	C	24	AF=0.013889;AQ=24	GT:DP:AD:GQ:PL:RNC	0/0:24:24,0:50:0,84,839:..	0/0:25:25,0:50:0,99,989:..	0/0:19:19,0:50:0,63,629:..	0/0:24:24,0:50:0,72,719:..	0/0:25:25,0:50:0,75,749:..	0/0:25:25,0:48:0,75,749:..	0/0:22:22,0:50:0,66,659:..	0/0:23:23,0:48:0,69,689:..	0/0:18:18,0:24:0,24,479:..	0/1:23:17,6:24:24,0,49:..	0/0:23:23,0:50:0,75,749:..	0/0:20:20,0:50:0,63,629:..	0/0:24:24,0:50:0,72,719:..	0/0:23:23,0:48:0,72,719:..	0/0:23:23,0:50:0,72,719:..	0/0:22:22,0:48:0,75,749:..	0/0:19:19,0:50:0,84,839:..	0/0:28:28,0:50:0,84,839:..	0/0:23:23,0:48:0,69,689:..	0/0:19:19,0:50:0,57,569:..	0/0:19:19,0:50:0,60,599:..	0/0:23:23,0:50:0,69,689:..	0/0:17:17,0:50:0,63,629:..	0/0:24:24,0:48:0,78,779:..	0/0:18:18,0:50:0,54,539:..	0/0:22:22,0:48:0,69,689:..	0/0:25:25,0:48:0,75,749:..	0/0:25:25,0:48:0,75,749:..	0/0:24:24,0:50:0,75,749:..	0/0:20:20,0:48:0,72,719:..	0/0:21:21,0:50:0,66,659:..	0/0:21:21,0:50:0,63,629:..	0/0:25:25,0:45:0,45,689:..	0/0:26:26,0:50:0,78,779:..	0/0:22:22,0:48:0,51,749:..	0/0:25:25,0:48:0,78,779:..	seq2
chr1	157644844	chr1_157644844_T_C	T	C	12	AF=0.013889;AQ=12	GT:DP:AD:GQ:PL:RNC	0/0:14:14,0:42:0,45,449:..	0/0:16:16,0:48:0,54,539:..	0/0:18:18,0:50:0,72,719:..	0/0:19:19,0:48:0,84,839:..	0/0:19:19,0:50:0,66,659:..	0/0:23:23,0:48:0,69,689:..	0/0:21:21,0:50:0,63,629:..	0/0:26:26,0:48:0,99,989:..	0/0:16:16,0:48:0,48,479:..	0/1:17:14,3:13:12,0,40:..	0/0:24:24,0:48:0,72,719:..	0/0:23:23,0:50:0,75,749:..	0/0:18:18,0:50:0,99,989:..	0/0:19:19,0:50:0,60,599:..	0/0:27:27,0:50:0,81,809:..	0/0:18:18,0:50:0,66,659:..	0/0:25:25,0:50:0,99,989:..	0/0:16:16,0:48:0,48,479:..	0/0:20:20,0:48:0,72,719:..	0/0:24:24,0:50:0,72,719:..	0/0:25:25,0:50:0,75,749:..	0/0:21:21,0:50:0,66,659:..	0/0:18:18,0:50:0,57,569:..	0/0:26:26,0:48:0,84,839:..	0/0:22:22,0:50:0,78,779:..	0/0:24:24,0:48:0,72,719:..	0/0:20:20,0:50:0,60,599:..	0/0:18:18,0:48:0,57,569:..	0/0:17:17,0:50:0,51,509:..	0/0:22:22,0:48:0,81,809:..	0/0:21:21,0:50:0,72,719:..	0/0:16:16,0:48:0,51,509:..	0/0:21:21,0:50:0,72,719:..	0/0:23:23,0:50:0,69,689:..	0/0:22:22,0:50:0,72,719:..	0/0:23:23,0:50:0,69,689:..	seq2
chr1	157906379	chr1_157906379_C_T	C	T	35	AF=0.013889;AQ=35	GT:DP:AD:GQ:PL:RNC	0/0:18:18,0:48:0,75,749:..	0/0:42:42,0:50:0,117,1409:..	0/0:34:34,0:50:0,117,1169:..	0/0:32:32,0:50:0,78,1019:..	0/0:24:24,0:50:0,87,869:..	0/0:24:24,0:48:0,108,1079:..	0/0:32:32,0:36:0,36,839:..	0/0:32:32,0:50:0,99,989:..	0/0:22:22,0:50:0,75,749:..	0/0:25:25,0:48:0,87,1109:..	0/0:31:31,0:50:0,99,989:..	0/0:23:23,0:50:0,69,689:..	0/0:27:27,0:50:0,84,839:..	0/0:34:34,0:50:0,105,1049:..	0/0:29:29,0:50:0,87,869:..	0/0:29:29,0:50:0,102,1019:..	0/0:37:37,0:21:0,21,929:..	0/0:32:32,0:50:0,96,959:..	0/0:41:41,0:50:0,144,1439:..	0/0:31:31,0:50:0,105,1049:..	0/0:36:36,0:50:0,111,1109:..	0/0:23:23,0:50:0,114,1619:..	0/0:26:26,0:48:0,84,839:..	0/0:32:32,0:50:0,141,1409:..	0/0:21:21,0:50:0,102,1019:..	0/0:21:21,0:50:0,75,749:..	0/0:28:28,0:50:0,129,1289:..	0/0:25:25,0:50:0,96,959:..	0/0:33:33,0:50:0,108,1079:..	0/0:24:24,0:42:0,42,659:..	0/0:35:35,0:50:0,117,1169:..	0/0:32:32,0:50:0,105,1049:..	0/0:33:33,0:50:0,102,1019:..	0/0:37:37,0:50:0,117,1169:..	0/1:32:18,13:35:35,0,50:..	0/0:35:35,0:50:0,114,1139:..	seq2
chr1	162213906	chr1_162213906_G_A	G	A	45	AF=0.013889;AQ=45	GT:DP:AD:GQ:PL:RNC	0/0:25:25,0:50:0,90,899:..	0/0:20:20,0:50:0,93,929:..	0/0:21:21,0:48:0,72,719:..	0/0:25:25,0:48:0,75,749:..	0/0:19:19,0:50:0,60,599:..	0/0:21:21,0:50:0,63,629:..	0/0:16:16,0:48:0,48,479:..	0/0:24:24,0:50:0,72,719:..	0/0:25:25,0:48:0,60,839:..	0/0:16:16,0:48:0,48,479:..	0/0:23:23,0:48:0,69,689:..	0/0:21:21,0:50:0,66,659:..	0/0:24:24,0:50:0,72,719:..	0/0:22:22,0:50:0,93,929:..	0/0:25:25,0:48:0,84,839:..	0/0:16:16,0:48:0,48,479:..	0/0:23:23,0:50:0,75,749:..	0/0:22:22,0:48:0,75,749:..	0/0:16:16,0:48:0,66,659:..	0/0:23:23,0:50:0,72,719:..	0/0:21:21,0:50:0,66,659:..	0/1:45:17,28:44:45,0,48:..	0/0:23:23,0:48:0,72,719:..	0/0:27:27,0:50:0,102,1019:..	0/0:24:24,0:50:0,72,719:..	0/0:17:17,0:50:0,54,539:..	0/0:23:23,0:48:0,75,749:..	0/0:18:18,0:50:0,69,689:..	0/0:16:16,0:48:0,63,629:..	0/0:20:20,0:50:0,66,659:..	0/0:22:22,0:50:0,72,719:..	0/0:20:20,0:50:0,60,599:..	0/0:21:21,0:50:0,96,959:..	0/0:17:17,0:48:0,72,719:..	0/0:16:16,0:48:0,84,839:..	0/0:16:16,0:48:0,69,689:..	seq2
chr1	162856600	chr1_162856600_G_T	G	T	26	AF=0.013889;AQ=26	GT:DP:AD:GQ:PL:RNC	0/0:23:23,0:50:0,75,749:..	0/0:22:22,0:50:0,66,659:..	0/0:25:25,0:50:0,75,749:..	0/0:24:24,0:48:0,72,719:..	0/0:18:18,0:48:0,96,959:..	0/1:34:23,11:27:26,0,47:..	0/0:19:19,0:50:0,66,659:..	0/0:21:21,0:50:0,87,869:..	0/0:21:21,0:50:0,78,779:..	0/0:23:23,0:48:0,69,689:..	0/0:16:16,0:48:0,48,479:..	0/0:24:24,0:48:0,75,749:..	0/0:20:20,0:50:0,63,629:..	0/0:21:21,0:50:0,75,749:..	0/0:22:22,0:48:0,69,689:..	0/0:16:16,0:48:0,48,479:..	0/0:24:24,0:50:0,69,929:..	0/0:20:20,0:50:0,72,719:..	0/0:24:24,0:48:0,84,839:..	0/0:26:26,0:48:0,99,989:..	0/0:23:23,0:48:0,75,749:..	0/0:25:25,0:48:0,75,749:..	0/0:19:19,0:50:0,57,569:..	0/0:25:25,0:48:0,108,1079:..	0/0:22:22,0:48:0,84,839:..	0/0:21:21,0:48:0,72,719:..	0/0:27:27,0:50:0,87,869:..	0/0:26:26,0:50:0,84,839:..	0/0:20:20,0:48:0,60,599:..	0/0:20:20,0:50:0,63,629:..	0/0:18:18,0:50:0,57,569:..	0/0:21:21,0:48:0,63,629:..	0/0:27:27,0:50:0,90,899:..	0/0:21:21,0:48:0,63,629:..	0/0:19:19,0:48:0,72,719:..	0/0:16:16,0:48:0,48,479:..	seq2
chr1	163634452	chr1_163634452_C_G	C	G	23	AF=0.013889;AQ=23	GT:DP:AD:GQ:PL:RNC	0/0:11:11,0:33:0,33,329:..	0/0:16:16,0:48:0,48,479:..	0/0:14:14,0:42:0,45,449:..	0/0:9:9,0:27:0,27,269:..	0/0:10:10,0:30:0,30,299:..	0/0:14:14,0:42:0,42,419:..	0/0:12:12,0:36:0,36,359:..	0/0:19:19,0:27:0,27,509:..	0/0:16:16,0:48:0,48,479:..	0/0:14:14,0:42:0,45,449:..	0/0:11:11,0:33:0,33,329:..	0/1:17:7,9:22:23,0,25:..	0/0:10:10,0:30:0,30,299:..	0/0:18:18,0:50:0,57,569:..	0/0:18:18,0:50:0,54,539:..	0/0:17:17,0:50:0,51,509:..	0/0:7:7,0:21:0,24,239:..	0/0:14:14,0:42:0,45,449:..	0/0:13:13,0:39:0,39,389:..	0/0:12:12,0:36:0,36,359:..	0/0:16:16,0:48:0,48,479:..	0/0:16:16,0:48:0,48,479:..	0/0:14:14,0:42:0,42,419:..	0/0:19:19,0:50:0,57,569:..	0/0:17:17,0:50:0,51,509:..	0/0:23:20,0:45:0,0,0:..	0/0:18:18,0:50:0,57,569:..	0/0:11:11,0:33:0,33,329:..	0/0:13:13,0:39:0,39,389:..	0/0:14:14,0:42:0,45,449:..	0/0:17:17,0:48:0,51,509:..	0/0:11:11,0:33:0,33,329:..	0/0:18:18,0:24:0,24,479:..	0/0:16:16,0:48:0,63,629:..	0/0:15:15,0:45:0,45,449:..	0/0:12:12,0:36:0,36,359:..	seq2
chr1	165227844	chr1_165227844_C_A	C	A	37	AF=0.013889;AQ=37	GT:DP:AD:GQ:PL:RNC	0/0:25:25,0:50:0,75,749:..	0/0:20:20,0:48:0,84,839:..	0/0:20:20,0:50:0,60,599:..	0/0:18:18,0:50:0,57,569:..	0/0:26:26,0:50:0,78,779:..	0/0:22:22,0:50:0,93,929:..	0/0:23:23,0:48:0,72,719:..	0/0:14:14,0:42:0,42,419:..	0/0:18:18,0:50:0,54,539:..	0/0:21:21,0:50:0,66,659:..	0/0:16:16,0:48:0,48,479:..	0/0:22:22,0:48:0,75,749:..	0/0:24:24,0:50:0,81,809:..	0/0:19:19,0:48:0,135,1349:..	0/0:22:22,0:48:0,69,689:..	0/0:16:16,0:48:0,75,749:..	0/0:20:20,0:48:0,60,599:..	0/0:23:23,0:50:0,75,749:..	0/0:22:22,0:48:0,72,719:..	0/0:24:24,0:50:0,75,749:..	0/0:19:19,0:48:0,57,569:..	0/0:24:24,0:50:0,114,1139:..	0/0:16:16,0:48:0,57,569:..	0/0:25:25,0:48:0,75,989:..	0/0:23:23,0:48:0,75,749:..	0/0:22:22,0:50:0,75,749:..	0/0:27:27,0:48:0,96,959:..	0/0:17:17,0:48:0,75,749:..	0/0:23:23,0:48:0,78,779:..	0/0:21:21,0:48:0,63,629:..	0/0:20:20,0:48:0,75,749:..	0/0:14:14,0:42:0,45,449:..	0/1:34:20,14:38:37,0,56:..	0/0:25:25,0:50:0,81,809:..	0/0:20:20,0:50:0,60,599:..	0/0:26:26,0:50:0,93,929:..	seq2
chr1	167604261	chr1_167604261_C_G	C	G	18	AF=0.013889;AQ=18	GT:DP:AD:GQ:PL:RNC	0/0:23:23,0:48:0,72,719:..	0/0:23:23,0:50:0,69,689:..	0/0:24:24,0:48:0,72,719:..	0/0:15:15,0:45:0,45,449:..	0/0:18:18,0:50:0,57,569:..	0/0:23:23,0:48:0,69,689:..	0/0:23:23,0:48:0,75,749:..	0/0:16:16,0:48:0,66,659:..	0/0:24:24,0:48:0,84,839:..	0/0:20:20,0:48:0,63,629:..	0/0:17:17,0:50:0,69,689:..	0/0:27:27,0:50:0,66,899:..	0/0:17:17,0:50:0,84,839:..	0/0:21:21,0:50:0,69,689:..	0/0:25:25,0:50:0,114,1139:..	0/0:22:22,0:50:0,90,899:..	0/0:30:30,0:50:0,93,929:..	0/1:14:11,3:19:18,0,43:..	0/0:21:21,0:48:0,75,749:..	0/0:18:18,0:50:0,102,1019:..	0/0:24:24,0:50:0,114,1139:..	0/0:25:25,0:48:0,75,749:..	0/0:24:24,0:48:0,90,899:..	0/0:27:27,0:50:0,114,1139:..	0/0:21:21,0:50:0,63,629:..	0/0:16:16,0:48:0,72,719:..	0/0:28:28,0:50:0,99,989:..	0/0:25:25,0:50:0,93,929:..	0/0:23:23,0:50:0,75,749:..	0/0:22:22,0:50:0,75,749:..	0/0:24:24,0:50:0,105,1049:..	0/0:20:20,0:50:0,66,659:..	0/0:23:23,0:48:0,84,839:..	0/0:18:18,0:50:0,54,539:..	0/0:24:24,0:48:0,75,749:..	0/0:22:22,0:50:0,75,749:..	seq2
chr1	171546304	chr1_171546304_G_T	G	T	19	AF=0.013889;AQ=19	GT:DP:AD:GQ:PL:RNC	0/0:18:18,0:48:0,81,809:..	0/0:20:20,0:50:0,72,719:..	0/0:21:21,0:50:0,87,869:..	0/0:23:23,0:50:0,69,689:..	0/0:30:30,0:50:0,96,959:..	0/0:23:23,0:50:0,96,959:..	0/0:26:26,0:48:0,87,869:..	0/0:28:28,0:50:0,84,839:..	0/0:19:19,0:50:0,60,599:..	0/0:24:24,0:50:0,75,749:..	0/0:18:18,0:50:0,69,689:..	0/0:29:29,0:48:0,93,929:..	0/0:18:18,0:50:0,57,569:..	0/0:22:22,0:50:0,87,869:..	0/0:29:29,0:48:0,123,1229:..	0/0:25:25,0:48:0,84,839:..	0/1:23:14,9:20:19,0,38:..	0/0:24:24,0:48:0,75,749:..	0/0:23:23,0:50:0,75,749:..	0/0:24:24,0:48:0,96,959:..	0/0:23:23,0:48:0,81,809:..	0/0:16:16,0:48:0,99,989:..	0/0:28:28,0:50:0,102,1019:..	0/0:26:26,0:50:0,96,959:..	0/0:25:25,0:48:0,75,749:..	0/0:19:19,0:50:0,66,659:..	0/0:19:19,0:48:0,78,779:..	0/0:24:24,0:50:0,72,719:..	0/0:23:23,0:50:0,81,809:..	0/0:31:31,0:50:0,96,959:..	0/0:22:22,0:48:0,66,659:..	0/0:17:17,0:50:0,96,959:..	0/0:20:20,0:50:0,90,899:..	0/0:20:20,0:50:0,66,659:..	0/0:18:18,0:50:0,75,749:..	0/0:23:23,0:48:0,69,689:..	seq2
chr1	180305639	chr1_180305639_A_T	A	T	35	AF=0.013889;AQ=35	GT:DP:AD:GQ:PL:RNC	0/0:18:18,0:50:0,69,689:..	0/0:25:25,0:50:0,75,749:..	0/0:29:29,0:50:0,96,959:..	0/0:15:15,0:45:0,45,449:..	0/0:33:33,0:50:0,108,1079:..	0/0:28:28,0:50:0,87,869:..	0/0:25:25,0:48:0,84,839:..	0/0:21:21,0:50:0,72,719:..	0/0:20:20,0:50:0,60,599:..	0/0:28:28,0:50:0,60,839:..	0/0:22:22,0:48:0,66,659:..	0/0:17:17,0:48:0,90,899:..	0/0:20:20,0:48:0,78,779:..	0/0:29:29,0:50:0,87,869:..	0/0:21:21,0:50:0,63,869:..	0/0:32:32,0:50:0,102,1019:..	0/0:22:22,0:48:0,69,689:..	0/0:19:19,0:50:0,57,569:..	0/0:31:31,0:50:0,93,929:..	0/0:25:25,0:50:0,75,749:..	0/0:25:25,0:50:0,93,929:..	0/0:28:28,0:48:0,117,1169:..	0/0:19:19,0:50:0,75,749:..	0/0:23:23,0:48:0,75,749:..	0/0:18:18,0:50:0,54,539:..	0/0:24:24,0:50:0,72,719:..	0/0:25:25,0:50:0,75,749:..	0/1:29:15,14:35:35,0,50:..	0/0:17:17,0:50:0,51,509:..	0/0:17:17,0:50:0,57,569:..	0/0:39:39,0:50:0,117,1169:..	0/0:24:24,0:50:0,81,809:..	0/0:23:23,0:48:0,105,1049:..	0/0:17:17,0:50:0,54,539:..	0/0:25:25,0:48:0,93,929:..	0/0:37:37,0:50:0,123,1229:..	seq2
chr1	185049123	chr1_185049123_G_A	G	A	39	AF=0.013889;AQ=39	GT:DP:AD:GQ:PL:RNC	0/0:21:21,0:50:0,63,629:..	0/0:32:32,0:50:0,96,959:..	0/0:22:22,0:48:0,75,749:..	0/1:24:13,11:39:39,0,53:..	0/0:22:22,0:36:0,36,599:..	0/0:25:25,0:50:0,75,749:..	0/0:23:23,0:50:0,69,689:..	0/0:21:21,0:33:0,33,569:..	0/0:14:14,0:42:0,42,419:..	0/0:25:25,0:48:0,75,749:..	0/0:18:18,0:50:0,57,569:..	0/0:23:23,0:50:0,69,689:..	0/0:16:16,0:48:0,75,749:..	0/0:24:24,0:50:0,75,749:..	0/0:17:17,0:50:0,57,569:..	0/0:21:21,0:50:0,63,629:..	0/0:24:24,0:50:0,84,839:..	0/0:16:16,0:48:0,48,479:..	0/0:23:23,0:39:0,39,629:..	0/0:25:25,0:50:0,78,779:..	0/0:25:25,0:50:0,75,749:..	0/0:20:20,0:50:0,69,689:..	0/0:14:14,0:42:0,45,449:..	0/0:31:31,0:48:0,96,959:..	0/0:22:22,0:50:0,66,659:..	0/0:16:16,0:48:0,60,599:..	0/0:28:28,0:50:0,60,839:..	0/0:22:22,0:7:0,6,539:..	0/0:19:19,0:50:0,63,629:..	0/0:24:24,0:48:0,90,899:..	0/0:20:20,0:50:0,60,599:..	0/0:23:23,0:50:0,90,899:..	0/0:22:22,0:48:0,66,659:..	0/0:21:21,0:33:0,33,569:..	0/0:16:16,0:48:0,54,539:..	0/0:22:22,0:50:0,66,659:..	seq2
chr1	188582762	chr1_188582762_C_T	C	T	35	AF=0.013889;AQ=35	GT:DP:AD:GQ:PL:RNC	0/0:17:17,0:50:0,60,599:..	0/0:20:20,0:50:0,69,689:..	0/0:21:21,0:50:0,63,629:..	0/1:19:10,9:35:35,0,51:..	0/0:23:23,0:48:0,75,749:..	0/0:20:20,0:50:0,75,749:..	0/0:23:23,0:48:0,69,689:..	0/0:16:16,0:48:0,48,479:..	0/0:17:17,0:50:0,69,689:..	0/0:20:20,0:50:0,63,629:..	0/0:17:17,0:48:0,75,749:..	0/0:20:20,0:48:0,90,899:..	0/0:17:17,0:50:0,51,509:..	0/0:19:19,0:48:0,66,659:..	0/0:23:23,0:48:0,72,719:..	0/0:16:16,0:48:0,69,689:..	0/0:24:24,0:48:0,72,719:..	0/0:16:16,0:48:0,54,539:..	0/0:20:20,0:50:0,69,689:..	0/0:21:21,0:48:0,78,779:..	0/0:24:24,0:48:0,99,989:..	0/0:24:24,0:50:0,75,749:..	0/0:18:18,0:48:0,75,749:..	0/0:26:26,0:50:0,96,959:..	0/0:21:21,0:50:0,66,659:..	0/0:20:20,0:50:0,69,689:..	0/0:30:30,0:48:0,90,899:..	0/0:24:24,0:50:0,72,719:..	0/0:22:22,0:48:0,66,659:..	0/0:24:24,0:42:0,42,659:..	0/0:19:19,0:48:0,69,689:..	0/0:16:16,0:48:0,48,479:..	0/0:22:22,0:48:0,96,959:..	0/0:21:21,0:50:0,75,749:..	0/0:24:24,0:50:0,72,719:..	0/0:18:18,0:50:0,57,569:..	seq2
chr1	189751155	chr1_189751155_C_T	C	T	42	AF=0.013889;AQ=42	GT:DP:AD:GQ:PL:RNC	0/0:23:23,0:48:0,75,749:..	0/0:25:25,0:50:0,84,839:..	0/0:29:29,0:50:0,111,1109:..	0/0:23:23,0:50:0,111,1109:..	0/0:20:20,0:48:0,60,599:..	0/0:26:26,0:50:0,99,989:..	0/1:29:15,14:43:42,0,55:..	0/0:17:17,0:50:0,87,869:..	0/0:16:16,0:48:0,75,749:..	0/0:24:24,0:50:0,123,1229:..	0/0:22:22,0:48:0,96,959:..	0/0:22:22,0:50:0,75,749:..	0/0:18:18,0:50:0,63,629:..	0/0:20:20,0:50:0,102,1019:..	0/0:24:24,0:50:0,90,899:..	0/0:24:24,0:50:0,105,1049:..	0/0:22:22,0:50:0,84,839:..	0/0:29:29,0:50:0,90,899:..	0/0:18:18,0:50:0,87,869:..	0/0:24:24,0:50:0,96,959:..	0/0:18:18,0:48:0,66,659:..	0/0:21:21,0:48:0,84,839:..	0/0:29:29,0:50:0,93,929:..	0/0:30:30,0:50:0,105,1049:..	0/0:23:23,0:48:0,72,719:..	0/0:24:24,0:50:0,75,749:..	0/0:29:29,0:48:0,114,1139:..	0/0:29:29,0:50:0,123,1229:..	0/0:27:27,0:50:0,84,839:..	0/0:25:25,0:50:0,99,989:..	0/0:25:25,0:48:0,90,899:..	0/0:17:17,0:50:0,72,719:..	0/0:20:20,0:48:0,117,1169:..	0/0:21:21,0:50:0,102,1019:..	0/0:22:22,0:48:0,75,749:..	0/0:23:23,0:50:0,75,749:..	seq2
chr1	190287663	chr1_190287663_G_A	G	A	43	AF=0.013889;AQ=43	GT:DP:AD:GQ:PL:RNC	0/0:21:21,0:50:0,81,809:..	0/0:19:19,0:48:0,72,719:..	0/0:23:23,0:48:0,84,839:..	0/0:34:34,0:50:0,75,989:..	0/1:30:12,18:43:43,0,49:..	0/0:24:24,0:50:0,99,989:..	0/0:16:16,0:48:0,48,479:..	0/0:24:24,0:50:0,72,719:..	0/0:25:25,0:50:0,75,749:..	0/0:22:22,0:50:0,87,869:..	0/0:21:21,0:50:0,72,719:..	0/0:21:21,0:48:0,99,989:..	0/0:21:21,0:50:0,72,719:..	0/0:18:18,0:48:0,57,569:..	0/0:21:21,0:50:0,69,689:..	0/0:23:23,0:50:0,72,719:..	0/0:27:27,0:50:0,81,809:..	0/0:15:15,0:45:0,45,449:..	0/0:25:25,0:48:0,75,749:..	0/0:22:22,0:50:0,75,749:..	0/0:23:23,0:48:0,78,779:..	0/0:34:34,0:50:0,111,1109:..	0/0:24:24,0:50:0,72,719:..	0/0:26:26,0:50:0,78,779:..	0/0:21:21,0:48:0,75,749:..	0/0:23:23,0:50:0,69,689:..	0/0:24:24,0:50:0,90,899:..	0/0:22:22,0:50:0,75,749:..	0/0:26:26,0:50:0,99,989:..	0/0:25:25,0:50:0,99,989:..	0/0:22:22,0:50:0,84,839:..	0/0:20:20,0:48:0,63,629:..	0/0:20:20,0:48:0,69,689:..	0/0:25:25,0:50:0,78,779:..	0/0:16:16,0:48:0,99,989:..	0/0:21:21,0:50:0,78,779:..	seq2
chr1	190637391	chr1_190637391_G_A	G	A	40	AF=0.013889;AQ=40	GT:DP:AD:GQ:PL:RNC	0/0:18:18,0:48:0,72,719:..	0/0:23:23,0:48:0,75,749:..	0/0:20:20,0:50:0,60,599:..	0/0:23:23,0:48:0,78,779:..	0/0:28:28,0:50:0,105,1049:..	0/0:23:23,0:50:0,72,719:..	0/0:21:21,0:50:0,90,899:..	0/0:18:18,0:48:0,60,599:..	0/0:19:19,0:48:0,66,659:..	0/0:25:25,0:48:0,105,1049:..	0/1:32:17,15:41:40,0,55:..	0/0:16:16,0:48:0,60,599:..	0/0:18:18,0:50:0,66,659:..	0/0:26:26,0:50:0,108,1079:..	0/0:28:28,0:48:0,108,1079:..	0/0:23:23,0:48:0,72,959:..	0/0:24:24,0:48:0,99,989:..	0/0:21:21,0:48:0,105,1049:..	0/0:29:29,0:50:0,93,929:..	0/0:20:20,0:50:0,90,899:..	0/0:23:23,0:48:0,69,689:..	0/0:23:23,0:50:0,90,899:..	0/0:24:24,0:48:0,96,959:..	0/0:23:23,0:50:0,111,1109:..	0/0:18:18,0:50:0,87,869:..	0/0:22:22,0:48:0,75,749:..	0/0:25:25,0:48:0,126,1259:..	0/0:25:25,0:50:0,75,749:..	0/0:21:21,0:50:0,66,659:..	0/0:18:18,0:48:0,54,779:..	0/0:27:27,0:50:0,114,1139:..	0/0:22:22,0:50:0,75,749:..	0/0:24:24,0:48:0,129,1289:..	0/0:24:24,0:50:0,75,749:..	0/0:22:22,0:50:0,84,839:..	0/0:22:22,0:48:0,69,689:..	seq2
chr2	5610427	chr2_5610427_A_C	A	C	29	AF=0.013889;AQ=29	GT:DP:AD:GQ:PL:RNC	0/0:28:28,0:24:0,24,719:..	0/0:29:29,0:27:0,27,749:..	0/0:34:34,0:42:0,42,899:..	0/1:15:8,7:29:29,0,43:..	0/0:24:24,0:48:0,72,719:..	0/0:26:26,0:0:11,0,611:II	0/0:20:20,0:30:0,30,539:..	0/0:25:25,0:45:0,45,689:..	0/0:25:22,3:41:0,41,52:..	0/0:27:27,0:50:0,84,839:..	0/0:23:23,0:39:0,39,629:..	0/0:27:27,0:0:8,0,638:II	0/0:25:25,0:50:0,75,749:..	0/0:33:33,0:39:0,39,869:..	0/0:22:19,3:48:0,49,56:..	0/0:28:28,0:50:0,141,1409:..	0/0:16:16,0:18:0,18,419:..	0/0:23:23,0:50:0,69,689:..	0/0:28:28,0:50:0,84,839:..	0/0:22:22,0:7:0,6,539:..	0/0:40:40,0:3:0,0,959:..	0/0:31:31,0:33:0,33,809:..	0/0:23:23,0:48:0,78,779:..	0/0:16:16,0:48:0,60,599:..	0/0:19:19,0:50:0,75,749:..	0/0:32:32,0:7:0,6,779:..	0/0:27:22,4:51:0,52,56:..	0/0:20:20,0:30:0,30,539:..	0/0:30:30,0:30:0,30,779:..	0/0:27:27,0:21:0,21,689:..	0/0:26:26,0:18:0,18,659:..	0/0:39:39,0:1:2,0,932:II	0/0:21:21,0:33:0,33,569:..	0/0:20:20,0:3:0,0,479:..	0/0:19:16,3:47:0,48,54:..	0/0:25:25,0:50:0,75,749:..	seq2
chr2	10176401	chr2_10176401_T_C	T	C	27	AF=0.013889;AQ=27	GT:DP:AD:GQ:PL:RNC	0/0:18:18,0:50:0,54,539:..	0/0:21:21,0:50:0,63,629:..	0/0:18:18,0:50:0,84,839:..	0/0:23:23,0:50:0,69,689:..	0/0:24:24,0:48:0,75,749:..	0/0:24:24,0:48:0,102,1019:..	0/0:24:24,0:48:0,90,899:..	0/0:20:20,0:50:0,69,689:..	0/0:24:24,0:50:0,96,959:..	0/0:23:23,0:48:0,69,689:..	0/0:22:22,0:50:0,66,659:..	0/0:20:20,0:48:0,63,629:..	0/0:23:23,0:50:0,69,689:..	0/0:26:26,0:50:0,78,779:..	0/0:21:21,0:48:0,75,749:..	0/0:23:23,0:48:0,72,719:..	0/0:25:25,0:50:0,105,1049:..	0/0:23:23,0:50:0,72,719:..	0/0:20:20,0:48:0,75,749:..	0/0:24:24,0:48:0,72,719:..	0/0:19:19,0:50:0,69,689:..	0/0:20:20,0:50:0,69,689:..	0/0:26:26,0:50:0,96,959:..	0/0:24:24,0:48:0,78,779:..	0/0:16:16,0:48:0,48,479:..	0/0:23:23,0:50:0,69,689:..	0/0:26:26,0:50:0,78,779:..	0/0:22:22,0:50:0,66,659:..	0/0:23:23,0:48:0,69,689:..	0/0:21:21,0:50:0,66,659:..	0/0:26:26,0:50:0,93,929:..	0/0:22:22,0:50:0,72,719:..	0/0:24:24,0:50:0,72,719:..	0/1:31:20,11:27:27,0,50:..	0/0:20:20,0:50:0,66,659:..	0/0:24:24,0:50:0,75,749:..	seq2
chr2	10179122	chr2_10179122_A_G	A	G	34	AF=0.013889;AQ=34	GT:DP:AD:GQ:PL:RNC	0/0:16:16,0:48:0,66,659:..	0/0:21:21,0:50:0,87,869:..	0/0:21:21,0:48:0,75,749:..	0/0:17:17,0:50:0,60,599:..	0/0:16:16,0:48:0,114,1139:..	0/0:21:21,0:50:0,63,629:..	0/0:16:16,0:48:0,57,569:..	0/0:16:16,0:48:0,57,569:..	0/0:22:22,0:50:0,54,779:..	0/0:24:24,0:48:0,108,1079:..	0/0:17:17,0:50:0,66,659:..	0/0:21:21,0:50:0,99,989:..	0/0:18:18,0:50:0,69,689:..	0/0:25:25,0:48:0,84,839:..	0/0:20:20,0:50:0,111,1109:..	0/0:26:26,0:50:0,102,1019:..	0/0:27:27,0:50:0,75,989:..	0/0:27:27,0:50:0,93,929:..	0/0:23:23,0:48:0,87,1109:..	0/0:19:19,0:50:0,102,1019:..	0/0:20:20,0:50:0,102,1019:..	0/1:34:20,14:35:34,0,51:..	0/0:22:22,0:50:0,66,659:..	0/0:20:20,0:50:0,102,1019:..	0/0:23:23,0:48:0,78,779:..	0/0:23:23,0:50:0,96,959:..	0/0:28:28,0:50:0,84,839:..	0/0:19:19,0:50:0,75,749:..	0/0:22:22,0:50:0,99,989:..	0/0:24:24,0:48:0,108,1079:..	0/0:23:23,0:50:0,69,689:..	0/0:20:20,0:50:0,72,719:..	0/0:24:24,0:50:0,114,1139:..	0/0:21:21,0:50:0,87,869:..	0/0:21:21,0:48:0,84,839:..	0/0:24:24,0:50:0,102,1019:..	seq2
chr2	11638703	chr2_11638703_G_T	G	T	16	AF=0.013889;AQ=16	GT:DP:AD:GQ:PL:RNC	0/0:16:16,0:48:0,48,479:..	0/0:16:16,0:48:0,63,629:..	0/0:22:22,0:50:0,78,779:..	0/0:17:17,0:50:0,51,509:..	0/0:23:23,0:50:0,72,719:..	0/0:26:26,0:50:0,78,779:..	0/0:15:15,0:45:0,45,449:..	0/0:18:18,0:50:0,57,569:..	0/0:17:17,0:48:0,54,539:..	0/0:21:21,0:50:0,63,629:..	0/0:14:14,0:42:0,45,449:..	0/0:19:19,0:50:0,63,629:..	0/0:16:16,0:48:0,48,479:..	0/0:21:21,0:48:0,63,629:..	0/0:28:28,0:24:0,24,719:..	0/1:18:12,6:17:16,0,41:..	0/0:21:21,0:50:0,63,629:..	0/0:12:12,0:36:0,36,359:..	0/0:23:23,0:48:0,78,779:..	0/0:23:23,0:50:0,69,689:..	0/0:21:21,0:50:0,75,749:..	0/0:26:26,0:50:0,90,899:..	0/0:23:23,0:50:0,72,719:..	0/0:17:17,0:50:0,54,539:..	0/0:20:20,0:50:0,69,689:..	0/0:17:17,0:50:0,54,539:..	0/0:22:22,0:36:0,36,599:..	0/0:14:14,0:42:0,42,419:..	0/0:25:25,0:48:0,75,749:..	0/0:16:16,0:48:0,48,479:..	0/0:22:22,0:50:0,84,839:..	0/0:21:21,0:50:0,90,899:..	0/0:18:18,0:50:0,60,599:..	0/0:17:17,0:50:0,51,509:..	0/0:25:25,0:48:0,78,779:..	0/0:22:22,0:50:0,66,659:..	seq2
chr2	12751081	chr2_12751081_G_A	G	A	47	AF=0.013889;AQ=47	GT:DP:AD:GQ:PL:RNC	0/0:16:16,0:48:0,63,629:..	0/0:21:21,0:50:0,72,719:..	0/0:22:22,0:48:0,102,1019:..	0/0:20:20,0:50:0,66,659:..	0/0:26:26,0:50:0,78,779:..	0/0:22:22,0:50:0,72,719:..	0/0:20:20,0:50:0,78,779:..	0/0:19:19,0:50:0,66,899:..	0/0:26:26,0:50:0,84,839:..	0/0:22:22,0:48:0,75,749:..	0/0:23:23,0:48:0,84,839:..	0/0:19:19,0:50:0,57,569:..	0/0:23:23,0:48:0,105,1049:..	0/1:33:15,18:46:47,0,55:..	0/0:24:24,0:50:0,108,1079:..	0/0:16:16,0:48:0,57,569:..	0/0:22:22,0:48:0,78,779:..	0/0:25:25,0:50:0,78,779:..	0/0:20:20,0:50:0,72,719:..	0/0:24:24,0:50:0,111,1109:..	0/0:20:20,0:50:0,63,629:..	0/0:21:21,0:50:0,111,1109:..	0/0:23:23,0:50:0,69,689:..	0/0:24:24,0:50:0,87,869:..	0/0:22:22,0:50:0,69,689:..	0/0:24:24,0:42:0,42,659:..	0/0:24:24,0:50:0,102,1019:..	0/0:17:17,0:50:0,51,509:..	0/0:31:31,0:50:0,99,989:..	0/0:31:31,0:50:0,129,1289:..	0/0:29:29,0:50:0,90,899:..	0/0:21:21,0:50:0,69,689:..	0/0:17:17,0:50:0,90,899:..	0/0:27:27,0:50:0,102,1019:..	0/0:12:12,0:36:0,39,389:..	0/0:22:22,0:50:0,69,689:..	seq2
chr2	29581679	chr2_29581679_A_G	A	G	40	AF=0.013889;AQ=40	GT:DP:AD:GQ:PL:RNC	0/0:16:16,0:48:0,72,719:..	0/0:19:19,0:48:0,60,599:..	0/0:23:23,0:48:0,96,959:..	0/0:24:24,0:50:0,99,989:..	0/0:24:24,0:50:0,75,749:..	0/0:23:23,0:48:0,72,719:..	0/0:24:24,0:50:0,72,719:..	0/0:19:19,0:48:0,60,599:..	0/0:22:22,0:48:0,69,689:..	0/0:23:23,0:50:0,135,1349:..	0/0:24:24,0:50:0,78,779:..	0/0:32:32,0:48:0,99,989:..	0/0:23:23,0:50:0,114,1139:..	0/0:23:23,0:48:0,72,719:..	0/0:21:21,0:50:0,69,689:..	0/0:16:16,0:48:0,114,1139:..	0/0:24:24,0:50:0,75,749:..	0/0:22:22,0:50:0,72,719:..	0/0:25:25,0:50:0,81,809:..	0/0:17:17,0:50:0,69,689:..	0/0:18:18,0:50:0,66,659:..	0/0:23:23,0:48:0,69,689:..	0/1:37:18,19:40:40,0,49:..	0/0:32:32,0:50:0,147,1469:..	0/0:26:26,0:50:0,93,929:..	0/0:25:25,0:50:0,75,749:..	0/0:26:26,0:50:0,108,1079:..	0/0:22:22,0:48:0,93,929:..	0/0:22:22,0:50:0,66,659:..	0/0:17:17,0:48:0,63,629:..	0/0:20:20,0:50:0,120,1199:..	0/0:18:18,0:50:0,78,779:..	0/0:23:23,0:50:0,72,719:..	0/0:17:17,0:50:0,54,539:..	0/0:21:21,0:48:0,66,659:..	0/0:24:24,0:50:0,96,959:..	seq2
chr2	30687445	chr2_30687445_C_T	C	T	45	AF=0.013889;AQ=45	GT:DP:AD:GQ:PL:RNC	0/0:16:16,0:48:0,69,689:..	0/0:17:17,0:50:0,57,569:..	0/0:16:16,0:48:0,48,479:..	0/0:23:23,0:48:0,99,989:..	0/0:21:21,0:50:0,114,1139:..	0/0:32:32,0:50:0,99,989:..	0/0:20:20,0:50:0,66,659:..	0/0:20:20,0:48:0,66,659:..	0/0:18:18,0:50:0,63,629:..	0/0:20:20,0:50:0,96,959:..	0/0:19:19,0:48:0,75,749:..	0/0:17:17,0:48:0,84,839:..	0/0:17:17,0:50:0,69,689:..	0/0:19:19,0:50:0,66,659:..	0/0:21:21,0:48:0,105,1049:..	0/0:25:25,0:45:0,45,689:..	0/0:32:32,0:50:0,105,1049:..	0/0:20:20,0:48:0,72,719:..	0/1:35:8,27:37:45,0,37:..	0/0:19:19,0:50:0,105,1049:..	0/0:17:17,0:50:0,75,749:..	0/0:29:29,0:50:0,114,1139:..	0/0:21:21,0:48:0,81,809:..	0/0:24:24,0:48:0,72,719:..	0/0:18:18,0:50:0,105,1049:..	0/0:29:29,0:50:0,93,929:..	0/0:26:26,0:48:0,78,779:..	0/0:18:18,0:48:0,72,719:..	0/0:20:20,0:50:0,78,779:..	0/0:21:21,0:50:0,72,719:..	0/0:19:19,0:50:0,72,719:..	0/0:24:24,0:50:0,72,719:..	0/0:24:24,0:50:0,75,749:..	0/0:23:23,0:50:0,69,689:..	0/0:21:21,0:50:0,69,689:..	0/0:23:23,0:48:0,150,1499:..	seq2
chr2	32342413	chr2_32342413_C_T	C	T	30	AF=0.013889;AQ=30	GT:DP:AD:GQ:PL:RNC	0/0:24:24,0:48:0,102,1019:..	0/0:16:16,0:48:0,105,1049:..	0/0:25:25,0:50:0,60,839:..	0/0:32:32,0:50:0,120,1199:..	0/0:26:26,0:50:0,96,959:..	0/0:25:25,0:50:0,99,989:..	0/0:31:31,0:50:0,111,1109:..	0/1:30:15,15:30:30,0,42:..	0/0:26:26,0:50:0,120,1199:..	0/0:25:25,0:48:0,129,1289:..	0/0:23:23,0:48:0,84,839:..	0/0:27:27,0:50:0,99,1229:..	0/0:34:34,0:42:0,42,899:..	0/0:24:24,0:50:0,84,839:..	0/0:25:25,0:50:0,117,1169:..	0/0:21:21,0:50:0,72,719:..	0/0:24:24,0:50:0,87,869:..	0/0:21:21,0:50:0,69,689:..	0/0:24:24,0:50:0,75,749:..	0/0:30:30,0:50:0,105,1049:..	0/0:22:22,0:50:0,90,899:..	0/0:22:22,0:50:0,66,659:..	0/0:29:29,0:50:0,96,959:..	0/0:30:30,0:50:0,96,959:..	0/0:23:23,0:48:0,96,959:..	0/0:28:28,0:50:0,93,929:..	0/0:33:33,0:50:0,156,1559:..	0/0:20:20,0:50:0,69,689:..	0/0:30:30,0:50:0,96,959:..	0/0:18:18,0:50:0,120,1199:..	0/0:26:26,0:50:0,90,899:..	0/0:22:22,0:50:0,72,719:..	0/0:23:23,0:50:0,132,1319:..	0/0:16:16,0:48:0,48,479:..	0/0:28:28,0:50:0,108,1079:..	0/0:30:30,0:50:0,117,1169:..	seq2
chr2	35938370	chr2_35938370_A_T	A	T	46	AF=0.013889;AQ=46	GT:DP:AD:GQ:PL:RNC	0/0:16:16,0:48:0,93,929:..	0/0:22:22,0:50:0,108,1079:..	0/0:29:29,0:50:0,105,1049:..	0/0:19:19,0:48:0,60,599:..	0/0:21:21,0:50:0,93,929:..	0/0:22:22,0:50:0,66,659:..	0/0:20:20,0:50:0,63,629:..	0/0:23:23,0:50:0,75,749:..	0/0:25:25,0:50:0,93,929:..	0/0:21:21,0:50:0,105,1049:..	0/0:19:19,0:48:0,90,899:..	0/0:20:20,0:48:0,75,749:..	0/0:23:23,0:50:0,93,929:..	0/0:22:22,0:50:0,126,1259:..	0/0:24:24,0:50:0,120,1199:..	0/0:22:22,0:48:0,96,959:..	0/0:29:29,0:50:0,114,1139:..	0/0:16:16,0:48:0,72,719:..	0/0:23:23,0:50:0,69,689:..	0/0:20:20,0:48:0,96,959:..	0/0:24:24,0:48:0,84,839:..	0/0:29:29,0:50:0,99,989:..	0/0:21:21,0:50:0,90,899:..	0/0:27:27,0:50:0,126,1259:..	0/0:23:23,0:48:0,72,719:..	0/0:22:22,0:48:0,90,899:..	0/0:24:24,0:50:0,96,959:..	0/0:21:21,0:48:0,93,929:..	0/0:25:25,0:48:0,78,779:..	0/0:19:19,0:48:0,63,869:..	0/0:24:24,0:50:0,75,749:..	0/0:18:18,0:50:0,72,719:..	0/0:17:17,0:50:0,69,689:..	0/0:25:25,0:50:0,75,749:..	0/1:27:12,15:46:46,0,54:..	0/0:20:20,0:50:0,108,1079:..	seq2
chr2	46552127	chr2_46552127_C_A	C	A	40	AF=0.013889;AQ=40	GT:DP:AD:GQ:PL:RNC	0/0:17:17,0:50:0,57,569:..	0/0:22:22,0:50:0,75,749:..	0/0:25:25,0:48:0,123,1229:..	0/0:23:23,0:48:0,72,719:..	0/0:21:21,0:50:0,72,719:..	0/0:23:23,0:50:0,69,689:..	0/0:16:16,0:48:0,48,479:..	0/0:22:22,0:50:0,75,749:..	0/0:16:16,0:48:0,48,479:..	0/0:17:17,0:50:0,102,1019:..	0/0:17:17,0:50:0,57,569:..	0/0:22:22,0:50:0,75,749:..	0/0:16:16,0:48:0,57,569:..	0/0:20:20,0:50:0,69,689:..	0/1:26:14,12:40:40,0,54:..	0/0:19:19,0:50:0,75,749:..	0/0:21:21,0:48:0,63,629:..	0/0:18:18,0:50:0,57,569:..	0/0:18:18,0:50:0,60,599:..	0/0:21:21,0:50:0,99,989:..	0/0:24:24,0:50:0,99,989:..	0/0:17:17,0:50:0,69,689:..	0/0:21:21,0:50:0,69,689:..	0/0:24:24,0:50:0,99,989:..	0/0:16:16,0:48:0,66,659:..	0/0:21:21,0:50:0,87,1109:..	0/0:22:22,0:50:0,72,719:..	0/0:21:21,0:48:0,93,929:..	0/0:24:24,0:50:0,78,1019:..	0/0:17:17,0:50:0,66,659:..	0/0:24:24,0:48:0,75,749:..	0/0:20:20,0:50:0,66,659:..	0/0:23:23,0:50:0,69,689:..	0/0:14:14,0:42:0,42,419:..	0/0:20:20,0:50:0,69,689:..	0/0:18:18,0:48:0,57,569:..	seq2
chr2	66161128	chr2_66161128_C_A	C	A	27	AF=0.013889;AQ=27	GT:DP:AD:GQ:PL:RNC	0/0:17:17,0:50:0,54,539:..	0/0:19:19,0:50:0,60,599:..	0/0:19:19,0:50:0,63,629:..	0/0:23:23,0:39:0,39,629:..	0/0:23:23,0:0:20,0,530:II	0/0:32:32,0:50:0,96,959:..	0/0:28:28,0:50:0,102,1019:..	0/0:11:11,0:33:0,33,329:..	0/0:16:16,0:48:0,54,539:..	0/0:25:25,0:50:0,93,929:..	0/0:23:23,0:50:0,69,689:..	0/0:24:24,0:50:0,99,989:..	0/0:24:24,0:50:0,93,929:..	0/0:19:19,0:50:0,66,659:..	0/1:27:18,9:27:27,0,50:..	0/0:16:16,0:48:0,63,629:..	0/0:24:24,0:48:0,87,869:..	0/0:30:30,0:30:0,30,779:..	0/0:19:19,0:50:0,57,569:..	0/0:24:24,0:50:0,96,959:..	0/0:24:24,0:48:0,84,839:..	0/0:16:16,0:48:0,102,1019:..	0/0:21:21,0:48:0,66,659:..	0/0:24:24,0:48:0,69,929:..	0/0:18:18,0:48:0,111,1109:..	0/0:19:19,0:50:0,75,749:..	0/0:24:24,0:50:0,90,899:..	0/0:21:21,0:50:0,72,719:..	0/0:25:25,0:15:0,15,629:..	0/0:24:24,0:48:0,87,869:..	0/0:22:22,0:50:0,102,1019:..	0/0:23:23,0:48:0,69,689:..	0/0:20:20,0:48:0,60,599:..	0/0:30:30,0:50:0,90,899:..	0/0:23:23,0:0:20,0,530:II	0/0:22:22,0:50:0,66,659:..	seq2
chr2	66967870	chr2_66967870_T_A	T	A	41	AF=0.013889;AQ=41	GT:DP:AD:GQ:PL:RNC	0/0:24:24,0:50:0,72,719:..	0/0:23:23,0:50:0,75,749:..	0/0:22:22,0:50:0,69,689:..	0/1:32:17,15:41:41,0,54:..	0/0:23:23,0:50:0,69,689:..	0/0:16:16,0:48:0,48,479:..	0/0:24:24,0:48:0,102,1019:..	0/0:21:21,0:50:0,63,629:..	0/0:23:23,0:50:0,75,749:..	0/0:23:23,0:50:0,75,749:..	0/0:18:18,0:50:0,72,719:..	0/0:25:25,0:48:0,75,749:..	0/0:23:23,0:50:0,75,749:..	0/0:22:22,0:50:0,105,1049:..	0/0:26:26,0:50:0,111,1109:..	0/0:20:20,0:48:0,72,719:..	0/0:19:19,0:50:0,60,599:..	0/0:17:17,0:50:0,63,629:..	0/0:23:23,0:50:0,72,719:..	0/0:23:23,0:50:0,75,749:..	0/0:17:17,0:48:0,72,719:..	0/0:24:24,0:50:0,90,899:..	0/0:16:16,0:48:0,48,479:..	0/0:22:22,0:50:0,102,1019:..	0/0:16:16,0:48:0,48,479:..	0/0:24:24,0:48:0,99,989:..	0/0:24:24,0:48:0,72,719:..	0/0:16:16,0:48:0,48,479:..	0/0:17:17,0:50:0,57,569:..	0/0:21:21,0:50:0,78,779:..	0/0:21:21,0:48:0,66,659:..	0/0:16:16,0:48:0,48,479:..	0/0:23:23,0:48:0,72,719:..	0/0:18:18,0:50:0,69,689:..	0/0:18:18,0:50:0,60,599:..	0/0:20:20,0:50:0,66,659:..	seq2
chr2	75928873	chr2_75928873_C_T	C	T	46	AF=0.013889;AQ=46	GT:DP:AD:GQ:PL:RNC	0/0:16:16,0:48:0,63,629:..	0/0:19:19,0:50:0,66,659:..	0/0:24:24,0:50:0,72,719:..	0/0:24:24,0:48:0,72,719:..	0/0:23:23,0:50:0,75,749:..	0/0:24:24,0:48:0,72,719:..	0/0:18:18,0:50:0,54,539:..	0/0:22:22,0:48:0,66,659:..	0/0:23:23,0:48:0,75,749:..	0/0:29:29,0:50:0,93,929:..	0/0:23:23,0:48:0,72,719:..	0/0:23:23,0:50:0,75,749:..	0/0:29:29,0:50:0,105,1049:..	0/0:30:30,0:50:0,99,989:..	0/1:27:12,15:46:46,0,55:..	0/0:25:25,0:48:0,75,749:..	0/0:23:23,0:50:0,69,689:..	0/0:22:22,0:50:0,69,689:..	0/0:23:23,0:48:0,75,749:..	0/0:22:22,0:50:0,72,719:..	0/0:25:25,0:50:0,87,869:..	0/0:22:22,0:50:0,69,689:..	0/0:21:21,0:50:0,72,719:..	0/0:23:23,0:50:0,72,719:..	0/0:20:20,0:50:0,72,719:..	0/0:18:18,0:50:0,69,689:..	0/0:25:25,0:50:0,75,749:..	0/0:21:21,0:50:0,63,629:..	0/0:21:21,0:50:0,69,929:..	0/0:19:19,0:48:0,72,719:..	0/0:23:23,0:50:0,75,749:..	0/0:16:16,0:48:0,48,479:..	0/0:22:22,0:48:0,75,749:..	0/0:24:24,0:48:0,72,719:..	0/0:17:17,0:48:0,51,509:..	0/0:21:21,0:48:0,99,989:..	seq2
chr2	83452319	chr2_83452319_G_T	G	T	33	AF=0.013889;AQ=33	GT:DP:AD:GQ:PL:RNC	0/0:16:16,0:48:0,48,479:..	0/0:24:24,0:42:0,42,659:..	0/0:15:13,2:35:0,35,50:..	0/0:27:27,0:50:0,84,839:..	0/0:26:26,0:50:0,51,749:..	0/0:32:32,0:50:0,69,929:..	0/0:26:26,0:48:0,48,719:..	0/0:16:16,0:48:0,48,479:..	0/0:14:14,0:12:0,12,359:..	0/0:24:24,0:50:0,72,719:..	0/0:25:25,0:45:0,45,689:..	0/0:16:16,0:48:0,51,509:..	0/0:33:33,0:50:0,99,989:..	0/0:31:31,0:50:0,96,959:..	0/0:20:20,0:30:0,30,539:..	0/0:20:20,0:30:0,30,539:..	0/0:30:30,0:50:0,96,959:..	0/0:16:16,0:48:0,51,509:..	0/0:24:24,0:42:0,42,659:..	0/0:21:21,0:4:0,3,509:..	0/0:17:17,0:50:0,57,569:..	0/0:19:19,0:27:0,27,509:..	0/1:34:17,16:33:33,0,43:..	0/0:32:32,0:50:0,96,959:..	0/0:22:22,0:50:0,66,659:..	0/0:18:18,0:50:0,54,539:..	0/0:19:19,0:50:0,57,569:..	0/0:21:21,0:50:0,75,749:..	0/0:22:22,0:36:0,36,599:..	0/0:19:19,0:50:0,57,569:..	0/0:19:19,0:50:0,57,569:..	0/0:18:18,0:24:0,24,479:..	0/0:26:26,0:50:0,84,839:..	0/0:22:22,0:50:0,66,659:..	0/0:20:20,0:50:0,60,599:..	0/0:25:25,0:48:0,75,749:..	seq2
chr2	91284201	chr2_91284201_C_T	C	T	41	AF=0.013889;AQ=41	GT:DP:AD:GQ:PL:RNC	0/0:19:19,0:48:0,75,749:..	0/0:16:16,0:48:0,69,689:..	0/0:21:21,0:48:0,87,869:..	0/0:22:22,0:48:0,75,749:..	0/0:17:17,0:50:0,87,869:..	0/0:26:26,0:48:0,90,899:..	0/0:22:22,0:50:0,69,929:..	0/0:16:16,0:48:0,48,479:..	0/0:23:23,0:48:0,69,689:..	0/0:21:21,0:50:0,69,689:..	0/0:22:22,0:50:0,69,689:..	0/0:21:21,0:50:0,69,689:..	0/0:16:16,0:48:0,63,629:..	0/0:16:16,0:48:0,60,599:..	0/0:22:22,0:48:0,105,1049:..	0/0:16:16,0:48:0,63,629:..	0/0:21:21,0:48:0,51,749:..	0/0:20:20,0:48:0,75,749:..	0/0:20:20,0:50:0,57,809:..	0/0:25:25,0:50:0,117,1169:..	0/0:20:20,0:48:0,78,779:..	0/0:30:30,0:48:0,111,1109:..	0/0:24:24,0:50:0,102,1019:..	0/0:25:25,0:50:0,99,989:..	0/0:14:14,0:42:0,45,449:..	0/0:22:22,0:50:0,69,689:..	0/0:23:23,0:50:0,117,1169:..	0/1:23:11,12:41:41,0,52:..	0/0:24:24,0:48:0,75,749:..	0/0:18:18,0:50:0,72,719:..	0/0:25:25,0:50:0,93,929:..	0/0:18:18,0:50:0,90,899:..	0/0:23:23,0:48:0,102,1019:..	0/0:21:21,0:48:0,72,719:..	0/0:22:22,0:50:0,93,929:..	0/0:22:22,0:48:0,75,749:..	seq2
chr2	95436951	chr2_95436951_C_T	C	T	45	AF=0.013889;AQ=45	GT:DP:AD:GQ:PL:RNC	0/0:16:16,0:48:0,48,479:..	0/0:21:21,0:50:0,75,749:..	0/0:17:17,0:50:0,75,749:..	0/0:19:19,0:50:0,72,719:..	0/0:20:20,0:50:0,72,719:..	0/0:23:23,0:50:0,72,719:..	0/0:17:17,0:50:0,66,659:..	0/0:20:20,0:50:0,63,629:..	0/0:22:22,0:48:0,81,809:..	0/0:23:23,0:50:0,75,749:..	0/0:19:19,0:50:0,63,629:..	0/0:24:24,0:48:0,93,929:..	0/1:32:12,20:44:45,0,50:..	0/0:21:21,0:50:0,75,749:..	0/0:23:23,0:50:0,78,779:..	0/0:23:23,0:48:0,69,689:..	0/0:19:19,0:50:0,60,599:..	0/0:25:25,0:50:0,84,839:..	0/0:21:21,0:48:0,72,719:..	0/0:23:23,0:48:0,75,749:..	0/0:16:16,0:48:0,48,479:..	0/0:24:24,0:50:0,72,719:..	0/0:21:21,0:48:0,96,959:..	0/0:21:21,0:48:0,63,629:..	0/0:18:18,0:50:0,54,539:..	0/0:23:23,0:48:0,96,959:..	0/0:19:19,0:48:0,60,599:..	0/0:22:22,0:50:0,75,749:..	0/0:25:25,0:48:0,75,749:..	0/0:22:22,0:50:0,66,659:..	0/0:18:18,0:50:0,60,599:..	0/0:18:18,0:50:0,63,629:..	0/0:19:19,0:50:0,60,599:..	0/0:21:21,0:50:0,69,689:..	0/0:16:16,0:48:0,63,629:..	0/0:18:18,0:50:0,54,539:..	seq2
chr2	95885805	chr2_95885805_C_G	C	G	42	AF=0.013889;AQ=42	GT:DP:AD:GQ:PL:RNC	0/0:16:16,0:48:0,48,479:..	0/0:19:19,0:50:0,57,569:..	0/0:20:20,0:48:0,69,689:..	0/0:21:21,0:50:0,78,779:..	0/0:23:23,0:48:0,75,749:..	0/0:18:18,0:50:0,66,659:..	0/0:21:21,0:50:0,63,629:..	0/0:22:22,0:48:0,48,719:..	0/0:16:16,0:48:0,72,719:..	0/0:16:16,0:48:0,66,659:..	0/0:24:24,0:48:0,78,779:..	0/0:26:26,0:50:0,84,839:..	0/0:23:23,0:50:0,69,689:..	0/0:23:23,0:48:0,81,809:..	0/0:19:19,0:50:0,57,569:..	0/0:24:24,0:50:0,72,719:..	0/0:21:21,0:50:0,117,1169:..	0/0:18:18,0:48:0,75,749:..	0/0:20:20,0:50:0,60,599:..	0/0:23:23,0:50:0,69,689:..	0/0:20:20,0:50:0,78,779:..	0/0:24:24,0:50:0,78,779:..	0/0:20:20,0:50:0,60,599:..	0/0:22:22,0:48:0,69,689:..	0/0:19:19,0:50:0,66,659:..	0/0:26:26,0:50:0,81,809:..	0/0:24:24,0:50:0,90,899:..	0/0:23:23,0:50:0,72,719:..	0/1:28:12,15:42:42,0,53:..	0/0:16:16,0:48:0,72,719:..	0/0:25:25,0:48:0,75,749:..	0/0:22:22,0:50:0,75,749:..	0/0:22:22,0:48:0,75,749:..	0/0:23:23,0:50:0,72,719:..	0/0:19:19,0:48:0,72,719:..	0/0:23:23,0:48:0,75,749:..	seq2
chr2	97808111	chr2_97808111_A_G	A	G	45	AF=0.013889;AQ=45	GT:DP:AD:GQ:PL:RNC	0/0:19:19,0:50:0,57,569:..	0/0:20:20,0:50:0,78,779:..	0/0:24:24,0:48:0,99,989:..	0/0:18:18,0:48:0,60,599:..	0/0:24:24,0:48:0,75,749:..	0/0:22:22,0:50:0,72,719:..	0/0:18:18,0:50:0,72,719:..	0/0:20:20,0:50:0,93,929:..	0/0:18:18,0:50:0,66,659:..	0/0:23:23,0:50:0,78,779:..	0/0:22:22,0:48:0,93,929:..	0/0:25:25,0:50:0,87,869:..	0/0:16:16,0:48:0,75,749:..	0/0:23:23,0:48:0,72,719:..	0/0:22:22,0:50:0,87,869:..	0/0:24:24,0:48:0,75,749:..	0/0:22:22,0:48:0,93,929:..	0/0:25:25,0:50:0,93,929:..	0/0:24:24,0:50:0,72,719:..	0/0:24:24,0:50:0,72,719:..	0/0:22:22,0:50:0,93,929:..	0/0:16:16,0:48:0,48,479:..	0/0:22:22,0:50:0,87,869:..	0/0:21:21,0:48:0,87,869:..	0/0:20:20,0:50:0,60,599:..	0/0:23:23,0:50:0,99,989:..	0/0:24:24,0:50:0,96,959:..	0/0:22:22,0:50:0,78,779:..	0/0:22:22,0:50:0,81,809:..	0/0:22:22,0:50:0,108,1079:..	0/0:19:19,0:50:0,105,1049:..	0/0:17:17,0:50:0,51,509:..	0/0:18:18,0:48:0,75,749:..	0/0:21:21,0:48:0,102,1019:..	0/0:21:21,0:50:0,72,719:..	0/1:31:13,18:45:45,0,54:..	seq2
chr2	106047651	chr2_106047651_G_A	G	A	40	AF=0.013889;AQ=40	GT:DP:AD:GQ:PL:RNC	0/0:21:21,0:50:0,66,659:..	0/0:19:19,0:50:0,63,629:..	0/0:16:16,0:48:0,96,959:..	0/0:23:23,0:48:0,81,809:..	0/0:25:25,0:50:0,69,929:..	0/0:13:13,0:9:0,9,329:..	0/0:16:16,0:48:0,75,749:..	0/0:17:17,0:50:0,75,749:..	0/0:23:23,0:50:0,72,719:..	0/0:23:23,0:50:0,117,1169:..	0/0:20:20,0:50:0,108,1079:..	0/0:18:18,0:50:0,105,1049:..	0/0:27:27,0:50:0,90,899:..	0/0:20:20,0:50:0,69,689:..	0/0:21:21,0:50:0,69,689:..	0/0:22:22,0:50:0,72,719:..	0/0:22:22,0:50:0,78,779:..	0/0:23:23,0:48:0,93,929:..	0/0:14:14,0:42:0,42,419:..	0/0:20:20,0:50:0,84,839:..	0/0:19:19,0:50:0,66,659:..	0/0:25:25,0:48:0,75,749:..	0/0:19:19,0:48:0,78,779:..	0/0:28:28,0:50:0,111,1109:..	0/0:24:24,0:50:0,99,989:..	0/0:24:24,0:50:0,72,959:..	0/1:23:12,11:41:40,0,55:..	0/0:23:23,0:50:0,78,779:..	0/0:26:26,0:50:0,75,989:..	0/0:20:20,0:30:0,30,539:..	0/0:23:23,0:50:0,72,719:..	0/0:22:22,0:48:0,81,809:..	0/0:17:17,0:50:0,75,749:..	0/0:20:20,0:50:0,84,839:..	0/0:25:25,0:50:0,102,1019:..	0/0:20:20,0:50:0,84,839:..	seq2
chr2	106197670	chr2_106197670_G_A	G	A	42	AF=0.013889;AQ=42	GT:DP:AD:GQ:PL:RNC	0/0:20:20,0:50:0,60,599:..	0/0:22:22,0:36:0,36,599:..	0/0:24:24,0:50:0,84,839:..	0/0:21:21,0:48:0,78,779:..	0/0:14:14,0:42:0,42,419:..	0/0:16:16,0:48:0,48,479:..	0/0:23:23,0:48:0,78,779:..	0/0:17:17,0:50:0,54,539:..	0/0:21:21,0:50:0,72,719:..	0/0:22:22,0:50:0,72,719:..	0/0:25:25,0:48:0,96,959:..	0/0:24:24,0:48:0,75,749:..	0/0:16:16,0:18:0,18,419:..	0/0:21:21,0:48:0,72,719:..	0/0:24:24,0:50:0,138,1379:..	0/0:18:18,0:50:0,111,1109:..	0/0:25:25,0:50:0,78,779:..	0/0:21:21,0:50:0,66,659:..	0/0:16:16,0:48:0,57,569:..	0/0:22:22,0:50:0,66,659:..	0/0:16:16,0:48:0,51,509:..	0/0:32:32,0:50:0,102,1019:..	0/0:16:16,0:48:0,48,479:..	0/0:24:24,0:50:0,84,839:..	0/0:22:22,0:48:0,75,749:..	0/0:27:27,0:50:0,102,1019:..	0/1:28:9,19:42:42,0,47:..	0/0:21:21,0:50:0,66,659:..	0/0:24:24,0:48:0,72,719:..	0/0:27:27,0:50:0,84,1079:..	0/0:30:30,0:50:0,102,1019:..	0/0:21:21,0:50:0,66,659:..	0/0:23:23,0:50:0,75,749:..	0/0:18:18,0:50:0,54,539:..	0/0:23:23,0:48:0,117,1169:..	0/0:16:16,0:48:0,48,479:..	seq2
chr2	107231860	chr2_107231860_G_A	G	A	40	AF=0.013889;AQ=40	GT:DP:AD:GQ:PL:RNC	0/0:19:19,0:50:0,57,569:..	0/0:20:20,0:50:0,66,659:..	0/0:20:20,0:50:0,63,629:..	0/0:27:27,0:50:0,84,839:..	0/0:19:19,0:50:0,63,629:..	0/0:22:22,0:48:0,66,659:..	0/0:23:23,0:50:0,72,719:..	0/0:25:25,0:50:0,87,869:..	0/0:16:16,0:48:0,48,479:..	0/0:18:18,0:48:0,75,749:..	0/0:22:22,0:48:0,66,659:..	0/1:22:11,11:40:40,0,56:..	0/0:17:17,0:48:0,69,689:..	0/0:24:24,0:50:0,102,1019:..	0/0:19:19,0:50:0,81,809:..	0/0:16:16,0:48:0,48,479:..	0/0:16:16,0:48:0,69,689:..	0/0:19:19,0:50:0,60,599:..	0/0:16:16,0:48:0,51,509:..	0/0:20:20,0:48:0,75,749:..	0/0:22:22,0:50:0,66,659:..	0/0:20:20,0:50:0,87,869:..	0/0:16:16,0:48:0,63,629:..	0/0:24:24,0:48:0,75,749:..	0/0:16:16,0:48:0,75,749:..	0/0:21:21,0:48:0,75,749:..	0/0:16:16,0:48:0,69,689:..	0/0:24:24,0:50:0,84,839:..	0/0:18:18,0:50:0,66,659:..	0/0:20:20,0:48:0,75,749:..	0/0:16:16,0:48:0,66,659:..	0/0:17:17,0:50:0,63,629:..	0/0:25:25,0:48:0,87,869:..	0/0:21:21,0:50:0,75,749:..	0/0:24:24,0:50:0,72,719:..	0/0:16:16,0:48:0,90,899:..	seq2
chr2	107700404	chr2_107700404_T_G	T	G	48	AF=0.013889;AQ=48	GT:DP:AD:GQ:PL:RNC	0/0:16:16,0:48:0,69,689:..	0/0:21:21,0:50:0,63,629:..	0/0:23:23,0:50:0,93,929:..	0/0:24:24,0:48:0,72,719:..	0/0:19:19,0:50:0,60,599:..	0/0:18:18,0:48:0,54,539:..	0/0:23:23,0:50:0,87,869:..	0/0:23:23,0:50:0,90,899:..	0/0:25:25,0:48:0,75,749:..	0/0:27:27,0:50:0,81,809:..	0/0:22:22,0:50:0,93,929:..	0/0:18:18,0:24:0,24,479:..	0/0:23:23,0:50:0,75,749:..	0/0:22:22,0:50:0,66,659:..	0/0:26:26,0:50:0,78,779:..	0/0:25:25,0:48:0,75,749:..	0/0:22:22,0:48:0,108,1079:..	0/0:22:22,0:50:0,81,809:..	0/0:20:20,0:50:0,60,599:..	0/0:24:24,0:48:0,75,749:..	0/0:22:22,0:48:0,90,899:..	0/1:46:20,26:47:48,0,53:..	0/0:21:21,0:50:0,72,719:..	0/0:22:22,0:50:0,99,989:..	0/0:16:16,0:48:0,63,629:..	0/0:17:17,0:48:0,81,809:..	0/0:21:21,0:50:0,63,629:..	0/0:20:20,0:50:0,96,959:..	0/0:22:22,0:50:0,93,929:..	0/0:20:20,0:48:0,66,659:..	0/0:23:23,0:48:0,69,689:..	0/0:21:21,0:48:0,75,749:..	0/0:24:24,0:50:0,78,779:..	0/0:18:18,0:48:0,75,749:..	0/0:16:16,0:48:0,72,719:..	0/0:24:24,0:50:0,87,869:..	seq2
chr2	109975704	chr2_109975704_C_T	C	T	43	AF=0.013889;AQ=43	GT:DP:AD:GQ:PL:RNC	0/0:24:24,0:50:0,69,929:..	0/0:16:16,0:48:0,48,479:..	0/0:22:22,0:48:0,72,719:..	0/0:19:19,0:50:0,57,569:..	0/0:22:22,0:50:0,78,779:..	0/0:24:24,0:48:0,75,749:..	0/0:24:24,0:48:0,72,719:..	0/0:21:21,0:50:0,72,719:..	0/0:24:24,0:48:0,72,719:..	0/0:24:24,0:50:0,102,1019:..	0/0:24:24,0:48:0,78,779:..	0/0:29:29,0:50:0,78,1019:..	0/0:18:18,0:50:0,96,959:..	0/0:26:26,0:50:0,63,869:..	0/0:18:18,0:50:0,72,719:..	0/0:18:18,0:50:0,63,629:..	0/0:25:25,0:50:0,75,749:..	0/0:18:18,0:48:0,54,539:..	0/0:23:23,0:50:0,72,719:..	0/0:21:21,0:48:0,87,869:..	0/0:23:23,0:50:0,75,749:..	0/0:24:24,0:48:0,72,719:..	0/0:17:17,0:48:0,54,539:..	0/0:26:26,0:50:0,69,929:..	0/0:24:24,0:48:0,75,749:..	0/0:19:19,0:50:0,66,659:..	0/0:22:22,0:50:0,87,869:..	0/0:14:14,0:42:0,42,419:..	0/0:19:19,0:48:0,66,659:..	0/0:18:18,0:48:0,54,539:..	0/0:24:24,0:48:0,75,749:..	0/0:18:18,0:50:0,72,719:..	0/0:22:22,0:48:0,99,989:..	0/0:16:16,0:48:0,51,509:..	0/0:22:22,0:50:0,63,869:..	0/1:29:12,17:43:43,0,52:..	seq2
chr2	112103724	chr2_112103724_C_G	C	G	40	AF=0.013889;AQ=40	GT:DP:AD:GQ:PL:RNC	0/0:26:26,0:50:0,99,989:..	0/0:29:29,0:50:0,105,1049:..	0/0:21:21,0:50:0,63,629:..	0/0:26:26,0:50:0,78,779:..	0/0:29:29,0:50:0,87,869:..	0/0:16:16,0:48:0,54,539:..	0/0:22:22,0:50:0,75,749:..	0/0:18:18,0:50:0,72,719:..	0/0:23:23,0:48:0,75,749:..	0/0:24:24,0:50:0,72,719:..	0/0:20:20,0:50:0,72,719:..	0/0:34:34,0:50:0,117,1169:..	0/0:21:21,0:48:0,63,629:..	0/0:17:17,0:50:0,63,629:..	0/0:32:32,0:50:0,96,959:..	0/0:23:23,0:50:0,75,749:..	0/0:18:18,0:50:0,54,539:..	0/0:26:26,0:50:0,84,839:..	0/0:21:21,0:50:0,69,689:..	0/0:16:16,0:48:0,48,479:..	0/0:17:17,0:50:0,54,539:..	0/0:29:29,0:50:0,99,989:..	0/0:24:24,0:50:0,75,749:..	0/0:34:34,0:50:0,72,959:..	0/0:30:30,0:50:0,96,959:..	0/0:23:23,0:48:0,69,689:..	0/0:25:25,0:48:0,75,749:..	0/0:24:24,0:48:0,72,719:..	0/0:16:16,0:48:0,57,569:..	0/0:22:22,0:50:0,66,659:..	0/0:27:27,0:48:0,99,989:..	0/0:24:24,0:50:0,72,719:..	0/0:18:18,0:50:0,63,629:..	0/0:21:21,0:50:0,63,629:..	0/0:24:24,0:50:0,72,719:..	0/1:27:11,15:39:40,0,45:..	seq2
chr2	112473330	chr2_112473330_T_A	T	A	49	AF=0.013889;AQ=49	GT:DP:AD:GQ:PL:RNC	0/0:26:26,0:48:0,48,719:..	0/0:18:18,0:50:0,96,959:..	0/0:25:25,0:48:0,75,749:..	0/0:23:23,0:50:0,132,1319:..	0/0:21:21,0:50:0,87,869:..	0/0:23:23,0:50:0,108,1079:..	0/0:20:20,0:48:0,96,959:..	0/0:24:24,0:48:0,72,719:..	0/0:19:19,0:50:0,63,629:..	0/0:19:19,0:48:0,93,929:..	0/0:18:18,0:50:0,54,539:..	0/0:24:24,0:48:0,90,899:..	0/0:20:20,0:50:0,69,689:..	0/0:24:24,0:50:0,96,959:..	0/1:26:9,17:47:49,0,50:..	0/0:20:20,0:48:0,96,959:..	0/0:19:19,0:50:0,69,689:..	0/0:16:16,0:48:0,48,479:..	0/0:23:23,0:50:0,72,719:..	0/0:22:22,0:48:0,93,929:..	0/0:29:29,0:27:0,27,749:..	0/0:16:16,0:48:0,126,1259:..	0/0:22:22,0:50:0,72,719:..	0/0:25:25,0:50:0,126,1259:..	0/0:20:20,0:48:0,60,599:..	0/0:24:24,0:48:0,72,719:..	0/0:25:25,0:50:0,96,959:..	0/0:24:24,0:48:0,72,719:..	0/0:19:19,0:50:0,63,629:..	0/0:22:22,0:50:0,75,749:..	0/0:23:23,0:50:0,69,689:..	0/0:23:23,0:48:0,69,689:..	0/0:20:20,0:50:0,60,599:..	0/0:25:25,0:48:0,75,749:..	0/0:16:16,0:48:0,48,479:..	0/0:19:19,0:48:0,93,929:..	seq2
chr2	113841643	chr2_113841643_C_T	C	T	42	AF=0.013889;AQ=42	GT:DP:AD:GQ:PL:RNC	0/0:19:19,0:48:0,63,629:..	0/0:19:19,0:50:0,69,689:..	0/0:24:24,0:50:0,114,1139:..	0/0:24:24,0:48:0,90,899:..	0/0:23:23,0:48:0,60,1079:..	0/0:22:22,0:50:0,66,659:..	0/0:23:23,0:50:0,102,1019:..	0/0:23:23,0:50:0,75,749:..	0/0:25:25,0:50:0,87,869:..	0/0:17:17,0:50:0,90,899:..	0/0:16:16,0:48:0,48,479:..	0/0:22:22,0:48:0,105,1049:..	0/0:22:22,0:48:0,66,659:..	0/0:21:21,0:50:0,102,1019:..	0/0:23:23,0:48:0,93,929:..	0/0:24:24,0:50:0,108,1079:..	0/0:22:22,0:48:0,75,749:..	0/0:25:25,0:48:0,105,1049:..	0/0:20:20,0:48:0,93,929:..	0/1:42:19,23:42:42,0,50:..	0/0:17:17,0:50:0,69,689:..	0/0:23:23,0:50:0,75,749:..	0/0:24:24,0:48:0,72,719:..	0/0:25:25,0:48:0,75,749:..	0/0:17:17,0:48:0,66,899:..	0/0:24:24,0:48:0,72,719:..	0/0:33:33,0:50:0,120,1199:..	0/0:26:26,0:50:0,78,779:..	0/0:20:20,0:50:0,63,629:..	0/0:18:18,0:50:0,66,659:..	0/0:18:18,0:50:0,117,1169:..	0/0:13:13,0:39:0,39,389:..	0/0:19:19,0:48:0,87,869:..	0/0:22:22,0:50:0,69,689:..	0/0:16:16,0:48:0,57,569:..	0/0:16:16,0:48:0,48,479:..	seq2
chr2	132030669	chr2_132030669_T_C	T	C	45	AF=0.013889;AQ=45	GT:DP:AD:GQ:PL:RNC	0/0:20:20,0:50:0,66,659:..	0/0:17:17,0:50:0,60,599:..	0/0:22:22,0:50:0,69,689:..	0/0:20:20,0:50:0,60,599:..	0/0:20:20,0:50:0,105,1049:..	0/0:23:23,0:48:0,96,959:..	0/0:21:21,0:50:0,84,839:..	0/0:17:17,0:48:0,66,659:..	0/0:21:21,0:48:0,96,959:..	0/1:30:13,17:45:45,0,55:..	0/0:22:22,0:48:0,72,719:..	0/0:25:25,0:50:0,75,749:..	0/0:20:20,0:50:0,69,689:..	0/0:28:28,0:48:0,102,1019:..	0/0:24:24,0:50:0,72,719:..	0/0:24:24,0:50:0,72,719:..	0/0:25:25,0:50:0,99,989:..	0/0:23:23,0:48:0,72,719:..	0/0:18:18,0:48:0,75,749:..	0/0:16:16,0:48:0,63,629:..	0/0:25:25,0:50:0,75,749:..	0/0:27:27,0:50:0,102,1019:..	0/0:23:23,0:50:0,102,1019:..	0/0:25:25,0:50:0,84,839:..	0/0:21:21,0:48:0,69,689:..	0/0:19:19,0:50:0,66,659:..	0/0:28:28,0:50:0,87,869:..	0/0:22:22,0:50:0,69,929:..	0/0:25:25,0:48:0,93,929:..	0/0:23:23,0:50:0,72,719:..	0/0:20:20,0:50:0,63,629:..	0/0:16:16,0:48:0,69,689:..	0/0:23:23,0:50:0,72,719:..	0/0:23:23,0:48:0,69,689:..	0/0:19:19,0:50:0,57,569:..	0/0:21:21,0:50:0,69,689:..	seq2
chr2	140545124	chr2_140545124_C_T	C	T	42	AF=0.013889;AQ=42	GT:DP:AD:GQ:PL:RNC	0/0:22:22,0:36:0,36,599:..	0/0:33:33,0:50:0,105,1049:..	0/0:17:17,0:50:0,51,509:..	0/0:27:27,0:0:8,0,638:II	0/0:29:29,0:50:0,87,869:..	0/0:28:28,0:1:5,0,665:II	0/0:23:20,0:57:0,0,0:..	0/0:24:24,0:50:0,75,749:..	0/0:18:18,0:24:0,24,479:..	0/0:28:28,0:1:5,0,665:II	0/0:23:23,0:50:0,72,719:..	0/0:29:29,0:27:0,27,749:..	0/0:24:24,0:42:0,42,659:..	0/0:28:28,0:24:0,24,719:..	0/0:23:23,0:50:0,72,719:..	0/0:23:23,0:9:0,9,569:..	0/0:31:31,0:50:0,96,959:..	0/0:19:19,0:50:0,57,569:..	0/0:35:35,0:50:0,111,1109:..	0/0:20:20,0:30:0,30,539:..	0/0:26:26,0:50:0,78,779:..	0/0:24:24,0:50:0,129,1289:..	0/0:27:27,0:21:0,21,689:..	0/0:31:31,0:50:0,93,929:..	0/0:24:24,0:48:0,72,719:..	0/0:22:22,0:36:0,36,599:..	0/1:20:11,9:42:42,0,59:..	0/0:19:19,0:50:0,57,569:..	0/0:22:22,0:36:0,36,599:..	0/0:29:29,0:50:0,87,869:..	0/0:30:30,0:50:0,93,929:..	0/0:25:25,0:48:0,75,749:..	0/0:19:19,0:50:0,57,569:..	0/0:30:30,0:3:0,0,719:..	0/0:24:24,0:42:0,42,659:..	0/0:25:25,0:50:0,75,749:..	seq2
chr2	148144770	chr2_148144770_C_T	C	T	38	AF=0.013889;AQ=38	GT:DP:AD:GQ:PL:RNC	0/0:16:16,0:48:0,75,749:..	0/0:21:21,0:33:0,33,569:..	0/0:24:24,0:50:0,75,749:..	0/0:21:21,0:50:0,72,719:..	0/1:27:16,11:38:38,0,55:..	0/0:22:22,0:48:0,66,659:..	0/0:16:16,0:48:0,60,599:..	0/0:16:16,0:48:0,60,599:..	0/0:22:22,0:50:0,96,959:..	0/0:19:19,0:50:0,75,749:..	0/0:20:20,0:48:0,78,779:..	0/0:20:20,0:50:0,66,659:..	0/0:24:24,0:50:0,72,719:..	0/0:21:21,0:50:0,75,749:..	0/0:28:28,0:50:0,99,989:..	0/0:24:24,0:50:0,72,719:..	0/0:24:24,0:48:0,102,1019:..	0/0:20:20,0:50:0,69,689:..	0/0:16:16,0:48:0,48,479:..	0/0:26:26,0:50:0,90,899:..	0/0:24:24,0:50:0,75,749:..	0/0:29:29,0:50:0,120,1199:..	0/0:21:21,0:50:0,72,719:..	0/0:17:17,0:50:0,51,509:..	0/0:16:16,0:48:0,48,479:..	0/0:16:16,0:48:0,69,689:..	0/0:27:27,0:48:0,87,869:..	0/0:17:17,0:50:0,63,629:..	0/0:23:23,0:50:0,72,719:..	0/0:16:16,0:48:0,48,479:..	0/0:19:19,0:50:0,69,689:..	0/0:16:16,0:48:0,48,479:..	0/0:20:20,0:48:0,72,719:..	0/0:24:24,0:50:0,78,779:..	0/0:16:16,0:48:0,48,479:..	0/0:20:20,0:50:0,69,689:..	seq2
chr2	148491972	chr2_148491972_C_G	C	G	36	AF=0.013889;AQ=36	GT:DP:AD:GQ:PL:RNC	0/0:16:16,0:48:0,54,539:..	0/0:19:19,0:50:0,57,569:..	0/0:16:16,0:48:0,60,599:..	0/0:29:29,0:50:0,87,869:..	0/0:23:23,0:50:0,69,689:..	0/0:21:21,0:50:0,66,659:..	0/0:13:13,0:39:0,39,389:..	0/0:16:16,0:48:0,54,539:..	0/0:23:23,0:50:0,72,719:..	0/0:16:16,0:48:0,72,719:..	0/0:19:19,0:50:0,57,569:..	0/0:24:24,0:42:0,42,659:..	0/0:22:22,0:50:0,57,809:..	0/0:12:12,0:36:0,39,389:..	0/0:24:24,0:50:0,78,779:..	0/1:26:15,11:36:36,0,50:..	0/0:21:21,0:50:0,72,719:..	0/0:34:34,0:50:0,75,989:..	0/0:21:21,0:50:0,69,689:..	0/0:16:16,0:48:0,51,509:..	0/0:21:21,0:4:0,3,509:..	0/0:20:20,0:50:0,120,1199:..	0/0:19:19,0:50:0,57,569:..	0/0:23:23,0:50:0,75,749:..	0/0:20:20,0:50:0,69,689:..	0/0:16:16,0:48:0,57,569:..	0/0:25:25,0:50:0,105,1049:..	0/0:21:21,0:50:0,69,689:..	0/0:16:16,0:48:0,69,689:..	0/0:23:23,0:50:0,69,689:..	0/0:29:29,0:50:0,102,1019:..	0/0:18:18,0:50:0,54,539:..	0/0:19:19,0:48:0,60,599:..	0/0:17:17,0:50:0,51,509:..	0/0:10:10,0:30:0,30,299:..	0/0:23:23,0:48:0,72,719:..	seq2
chr2	154751657	chr2_154751657_A_G	A	G	22	AF=0.013889;AQ=22	GT:DP:AD:GQ:PL:RNC	0/0:21:21,0:50:0,63,629:..	0/0:18:18,0:50:0,72,719:..	0/0:20:20,0:50:0,123,1229:..	0/0:21:21,0:50:0,72,719:..	0/0:21:21,0:50:0,72,719:..	0/0:16:16,0:48:0,48,479:..	0/0:20:20,0:50:0,69,689:..	0/0:23:23,0:48:0,75,749:..	0/0:17:17,0:50:0,60,599:..	0/0:22:22,0:48:0,87,869:..	0/0:17:17,0:50:0,54,539:..	0/0:22:22,0:50:0,69,689:..	0/0:16:16,0:48:0,72,719:..	0/0:20:20,0:50:0,72,719:..	0/0:23:23,0:50:0,69,689:..	0/0:15:15,0:45:0,45,449:..	0/0:23:23,0:50:0,75,749:..	0/0:16:16,0:48:0,69,689:..	0/0:19:19,0:50:0,66,659:..	0/0:23:23,0:50:0,93,929:..	0/0:17:17,0:50:0,60,599:..	0/1:32:23,9:22:22,0,48:..	0/0:21:21,0:50:0,81,809:..	0/0:20:20,0:48:0,66,659:..	0/0:20:20,0:48:0,63,629:..	0/0:21:21,0:50:0,69,689:..	0/0:22:22,0:50:0,102,1019:..	0/0:20:20,0:50:0,75,749:..	0/0:24:24,0:50:0,87,869:..	0/0:21:21,0:50:0,63,629:..	0/0:25:25,0:48:0,120,1199:..	0/0:19:19,0:50:0,66,899:..	0/0:13:13,0:39:0,39,389:..	0/0:23:23,0:50:0,84,839:..	0/0:20:20,0:50:0,66,659:..	0/0:20:20,0:50:0,75,749:..	seq2
chr2	161811895	chr2_161811895_G_C	G	C	34	AF=0.013889;AQ=34	GT:DP:AD:GQ:PL:RNC	0/0:12:12,0:36:0,36,359:..	0/0:9:9,0:27:0,27,269:..	0/0:11:11,0:33:0,33,329:..	0/0:12:12,0:36:0,36,359:..	0/0:9:9,0:27:0,27,269:..	0/0:16:16,0:48:0,48,479:..	0/0:12:12,0:36:0,36,359:..	0/0:16:16,0:48:0,48,479:..	0/0:9:9,0:27:0,27,269:..	0/0:13:13,0:39:0,39,389:..	0/0:15:15,0:45:0,45,449:..	0/0:16:16,0:48:0,48,479:..	0/0:9:9,0:27:0,30,299:..	0/0:14:14,0:42:0,45,449:..	0/0:15:15,0:15:0,15,389:..	0/0:9:9,0:27:0,30,299:..	0/0:19:19,0:1:2,0,452:II	0/0:11:11,0:33:0,33,329:..	0/1:6:2,4:33:34,0,36:..	0/0:12:12,0:36:0,36,359:..	0/0:17:17,0:50:0,51,509:..	0/0:12:12,0:36:0,39,389:..	0/0:12:12,0:36:0,36,359:..	0/0:18:18,0:50:0,54,539:..	0/0:17:17,0:50:0,51,509:..	0/0:18:18,0:50:0,57,569:..	0/0:14:14,0:42:0,45,449:..	0/0:7:7,0:21:0,21,209:..	0/0:12:12,0:36:0,39,389:..	0/0:7:7,0:21:0,21,209:..	0/0:19:19,0:50:0,57,569:..	0/0:8:8,0:24:0,24,239:..	0/0:11:11,0:33:0,33,329:..	0/0:12:12,0:36:0,36,359:..	0/0:10:10,0:3:0,0,239:..	0/0:19:19,0:50:0,57,569:..	seq2
chr2	169445740	chr2_169445740_T_A	T	A	30	AF=0.013889;AQ=30	GT:DP:AD:GQ:PL:RNC	0/0:21:21,0:50:0,66,659:..	0/0:16:16,0:48:0,78,779:..	0/0:16:16,0:48:0,48,479:..	0/0:24:24,0:50:0,75,749:..	0/0:22:22,0:50:0,66,659:..	0/0:23:23,0:48:0,75,749:..	0/0:24:24,0:48:0,81,809:..	0/0:21:21,0:50:0,75,749:..	0/0:25:25,0:48:0,78,779:..	0/0:20:20,0:50:0,66,659:..	0/0:28:28,0:50:0,90,899:..	0/1:18:11,7:30:30,0,49:..	0/0:24:24,0:50:0,75,749:..	0/0:25:25,0:50:0,75,749:..	0/0:23:23,0:50:0,69,689:..	0/0:17:17,0:50:0,60,599:..	0/0:21:21,0:48:0,63,629:..	0/0:22:22,0:48:0,75,749:..	0/0:22:22,0:50:0,72,719:..	0/0:21:21,0:50:0,72,719:..	0/0:20:20,0:48:0,75,749:..	0/0:24:24,0:48:0,117,1169:..	0/0:17:17,0:50:0,99,989:..	0/0:24:24,0:48:0,84,839:..	0/0:24:24,0:48:0,72,719:..	0/0:17:17,0:50:0,57,569:..	0/0:27:27,0:50:0,102,1019:..	0/0:19:19,0:50:0,69,689:..	0/0:27:27,0:50:0,84,839:..	0/0:18:18,0:48:0,84,839:..	0/0:22:22,0:50:0,69,689:..	0/0:21:21,0:50:0,66,659:..	0/0:26:26,0:50:0,120,1199:..	0/0:19:19,0:50:0,90,899:..	0/0:21:21,0:48:0,69,689:..	0/0:28:28,0:50:0,105,1049:..	seq2
chr2	172792709	chr2_172792709_G_T	G	T	31	AF=0.013889;AQ=31	GT:DP:AD:GQ:PL:RNC	0/0:24:24,0:48:0,81,809:..	0/0:19:19,0:50:0,60,599:..	0/0:22:22,0:48:0,75,749:..	0/0:26:26,0:50:0,90,899:..	0/0:20:20,0:48:0,75,749:..	0/0:20:20,0:50:0,96,959:..	0/0:18:18,0:48:0,81,809:..	0/0:18:18,0:50:0,54,539:..	0/0:23:23,0:50:0,120,1199:..	0/0:26:26,0:50:0,102,1019:..	0/0:22:22,0:50:0,69,689:..	0/0:22:22,0:50:0,117,1169:..	0/0:18:18,0:50:0,54,539:..	0/0:26:26,0:50:0,78,779:..	0/0:24:24,0:48:0,78,779:..	0/0:28:28,0:50:0,90,899:..	0/1:25:15,10:32:31,0,50:..	0/0:25:25,0:50:0,81,809:..	0/0:20:20,0:50:0,93,929:..	0/0:19:19,0:50:0,69,689:..	0/0:21:21,0:48:0,72,719:..	0/0:24:24,0:48:0,75,1229:..	0/0:21:21,0:50:0,63,629:..	0/0:21:21,0:50:0,63,629:..	0/0:26:26,0:50:0,105,1049:..	0/0:21:21,0:48:0,63,869:..	0/0:18:18,0:50:0,57,569:..	0/0:28:28,0:50:0,90,899:..	0/0:22:22,0:50:0,69,689:..	0/0:23:23,0:50:0,69,689:..	0/0:27:27,0:50:0,96,959:..	0/0:16:16,0:48:0,72,719:..	0/0:24:24,0:50:0,87,869:..	0/0:32:32,0:50:0,96,959:..	0/0:24:24,0:48:0,120,1199:..	0/0:23:23,0:50:0,96,959:..	seq2
chr2	174297420	chr2_174297420_G_A	G	A	11	AF=0.013889;AQ=11	GT:DP:AD:GQ:PL:RNC	0/0:19:19,0:50:0,69,689:..	0/0:21:21,0:50:0,120,1199:..	0/0:22:22,0:50:0,108,1079:..	0/0:21:21,0:48:0,102,1019:..	0/0:16:16,0:48:0,48,479:..	0/0:18:18,0:48:0,102,1019:..	0/0:20:20,0:48:0,105,1049:..	0/0:22:22,0:48:0,78,779:..	0/0:21:21,0:50:0,63,629:..	0/0:28:28,0:50:0,60,839:..	0/0:23:23,0:48:0,78,779:..	0/0:22:22,0:50:0,108,1079:..	0/0:25:25,0:50:0,78,779:..	0/0:23:23,0:50:0,90,899:..	0/0:24:24,0:50:0,102,1019:..	0/0:22:22,0:50:0,72,719:..	0/0:27:27,0:48:0,102,1019:..	0/0:20:20,0:50:0,60,599:..	0/0:24:24,0:48:0,108,1079:..	0/0:20:20,0:50:0,72,719:..	0/0:24:24,0:50:0,99,989:..	0/0:29:29,0:48:0,126,1259:..	0/0:23:23,0:50:0,75,749:..	0/0:23:23,0:50:0,72,719:..	0/0:25:25,0:48:0,108,1079:..	0/0:24:24,0:48:0,75,749:..	0/0:24:24,0:50:0,93,929:..	0/0:20:20,0:50:0,75,749:..	0/1:27:22,5:11:11,0,40:..	0/0:21:21,0:50:0,66,659:..	0/0:23:23,0:48:0,78,779:..	0/0:24:24,0:50:0,75,749:..	0/0:17:17,0:50:0,114,1139:..	0/0:21:21,0:50:0,69,689:..	0/0:22:22,0:50:0,72,719:..	0/0:22:22,0:48:0,69,689:..	seq2
chr2	178806810	chr2_178806810_T_A	T	A	32	AF=0.013889;AQ=32	GT:DP:AD:GQ:PL:RNC	0/0:26:26,0:48:0,78,779:..	0/0:19:19,0:50:0,60,599:..	0/0:19:19,0:50:0,57,569:..	0/0:19:19,0:50:0,57,569:..	0/0:23:23,0:50:0,72,719:..	0/0:19:19,0:50:0,57,569:..	0/0:12:12,0:36:0,36,359:..	0/0:16:16,0:48:0,48,479:..	0/0:18:18,0:50:0,54,539:..	0/0:20:20,0:30:0,30,539:..	0/0:23:23,0:50:0,69,689:..	0/0:19:19,0:50:0,57,569:..	0/1:22:8,12:33:32,0,48:..	0/0:26:26,0:50:0,78,779:..	0/0:25:25,0:50:0,75,749:..	0/0:16:16,0:48:0,48,479:..	0/0:25:25,0:48:0,75,749:..	0/0:17:17,0:50:0,51,509:..	0/0:15:15,0:45:0,45,449:..	0/0:17:17,0:50:0,51,509:..	0/0:6:6,0:0:11,0,131:II	0/0:25:25,0:45:0,45,689:..	0/0:16:16,0:48:0,48,479:..	0/0:25:25,0:50:0,75,749:..	0/0:26:26,0:50:0,78,779:..	0/0:18:18,0:50:0,54,539:..	0/0:30:30,0:50:0,93,929:..	0/0:8:8,0:24:0,24,239:..	0/0:14:14,0:42:0,42,419:..	0/0:25:25,0:50:0,75,749:..	0/0:17:17,0:50:0,51,509:..	0/0:16:16,0:48:0,48,479:..	0/0:20:20,0:50:0,60,599:..	0/0:15:15,0:45:0,45,449:..	0/0:17:17,0:21:0,21,449:..	0/0:23:23,0:48:0,69,689:..	seq2
chr3	11514580	chr3_11514580_C_T	C	T	44	AF=0.013889;AQ=44	GT:DP:AD:GQ:PL:RNC	0/0:23:23,0:50:0,78,779:..	0/0:24:24,0:48:0,75,749:..	0/0:21:21,0:50:0,72,719:..	0/0:17:17,0:48:0,75,749:..	0/0:23:23,0:50:0,99,989:..	0/0:26:26,0:50:0,102,1019:..	0/1:30:14,16:44:44,0,52:..	0/0:24:24,0:48:0,75,749:..	0/0:25:25,0:48:0,81,809:..	0/0:25:25,0:50:0,117,1169:..	0/0:16:16,0:48:0,48,479:..	0/0:18:18,0:50:0,126,1259:..	0/0:17:17,0:50:0,51,509:..	0/0:23:23,0:50:0,72,719:..	0/0:21:21,0:48:0,63,629:..	0/0:20:20,0:50:0,66,659:..	0/0:21:21,0:50:0,63,629:..	0/0:20:20,0:50:0,81,809:..	0/0:26:26,0:50:0,99,989:..	0/0:19:19,0:50:0,75,749:..	0/0:19:19,0:50:0,57,569:..	0/0:24:24,0:50:0,72,719:..	0/0:21:21,0:50:0,63,629:..	0/0:28:28,0:50:0,90,899:..	0/0:25:25,0:48:0,75,749:..	0/0:22:22,0:50:0,69,689:..	0/0:21:21,0:48:0,75,749:..	0/0:22:22,0:48:0,96,959:..	0/0:24:24,0:48:0,120,1199:..	0/0:23:23,0:50:0,96,959:..	0/0:20:20,0:50:0,63,629:..	0/0:22:22,0:48:0,69,689:..	0/0:21:21,0:33:0,33,569:..	0/0:21:21,0:48:0,93,929:..	0/0:16:16,0:48:0,60,599:..	0/0:21:21,0:50:0,63,629:..	seq2
chr3	12438524	chr3_12438524_G_C	G	C	14	AF=0.013889;AQ=14	GT:DP:AD:GQ:PL:RNC	0/0:36:36,0:48:0,108,1079:..	0/0:23:23,0:50:0,114,1139:..	0/0:22:22,0:48:0,75,749:..	0/0:18:18,0:50:0,57,569:..	0/0:20:20,0:48:0,93,929:..	0/0:19:19,0:50:0,75,749:..	0/0:21:21,0:33:0,33,569:..	0/0:24:24,0:50:0,72,719:..	0/0:14:14,0:42:0,45,449:..	0/0:25:25,0:48:0,75,749:..	0/0:21:21,0:50:0,69,689:..	0/0:22:22,0:50:0,72,719:..	0/0:20:20,0:50:0,66,659:..	0/0:25:25,0:50:0,105,1049:..	0/0:26:26,0:50:0,102,1019:..	0/0:17:17,0:50:0,63,629:..	0/1:21:17,4:15:14,0,41:..	0/0:16:16,0:48:0,75,749:..	0/0:19:19,0:50:0,69,689:..	0/0:23:23,0:50:0,90,1139:..	0/0:30:30,0:30:0,30,779:..	0/0:32:32,0:50:0,147,1469:..	0/0:19:19,0:50:0,63,629:..	0/0:23:23,0:50:0,72,719:..	0/0:26:26,0:50:0,102,1019:..	0/0:17:17,0:48:0,72,719:..	0/0:22:22,0:50:0,126,1259:..	0/0:20:20,0:48:0,78,779:..	0/0:22:22,0:50:0,78,779:..	0/0:16:16,0:48:0,72,719:..	0/0:21:21,0:48:0,63,629:..	0/0:22:22,0:50:0,78,779:..	0/0:22:22,0:48:0,72,719:..	0/0:24:24,0:50:0,117,1169:..	0/0:24:24,0:50:0,96,959:..	0/0:24:24,0:50:0,129,1289:..	seq2
chr3	20046889	chr3_20046889_C_T	C	T	27	AF=0.013889;AQ=27	GT:DP:AD:GQ:PL:RNC	0/0:20:20,0:48:0,84,839:..	0/0:18:18,0:50:0,69,689:..	0/0:20:20,0:50:0,78,779:..	0/1:32:22,10:27:27,0,51:..	0/0:24:24,0:48:0,87,869:..	0/0:24:24,0:50:0,75,749:..	0/0:23:23,0:50:0,69,689:..	0/0:26:26,0:50:0,93,929:..	0/0:16:16,0:48:0,75,749:..	0/0:19:19,0:50:0,60,599:..	0/0:19:19,0:50:0,60,599:..	0/0:26:26,0:50:0,78,779:..	0/0:24:24,0:48:0,72,719:..	0/0:20:20,0:50:0,69,689:..	0/0:19:19,0:50:0,69,689:..	0/0:22:22,0:50:0,66,659:..	0/0:19:19,0:50:0,60,599:..	0/0:16:16,0:48:0,51,509:..	0/0:24:24,0:50:0,87,869:..	0/0:17:17,0:50:0,60,599:..	0/0:21:21,0:50:0,66,659:..	0/0:17:17,0:50:0,54,539:..	0/0:21:21,0:48:0,66,659:..	0/0:25:25,0:48:0,75,749:..	0/0:24:24,0:50:0,72,719:..	0/0:16:16,0:48:0,48,479:..	0/0:25:25,0:50:0,87,869:..	0/0:23:23,0:48:0,72,719:..	0/0:27:27,0:50:0,102,1019:..	0/0:16:16,0:48:0,87,869:..	0/0:20:20,0:50:0,63,629:..	0/0:19:19,0:50:0,72,719:..	0/0:24:24,0:48:0,75,749:..	0/0:22:22,0:50:0,72,719:..	0/0:22:22,0:48:0,87,869:..	0/0:25:25,0:50:0,57,809:..	seq2
chr3	28838904	chr3_28838904_C_T	C	T	39	AF=0.013889;AQ=39	GT:DP:AD:GQ:PL:RNC	0/0:25:25,0:50:0,75,749:..	0/0:21:21,0:50:0,75,749:..	0/0:29:29,0:50:0,102,1019:..	0/0:20:20,0:50:0,60,599:..	0/0:16:16,0:48:0,51,509:..	0/0:21:21,0:50:0,69,689:..	0/0:17:17,0:50:0,69,689:..	0/0:24:24,0:50:0,72,719:..	0/0:23:23,0:48:0,69,689:..	0/0:21:21,0:48:0,63,629:..	0/0:17:17,0:50:0,69,689:..	0/0:22:22,0:48:0,99,989:..	0/0:20:20,0:50:0,66,659:..	0/0:25:25,0:50:0,78,779:..	0/0:26:26,0:50:0,90,899:..	0/0:17:17,0:50:0,72,719:..	0/0:24:24,0:50:0,72,719:..	0/0:25:25,0:50:0,75,749:..	0/0:22:22,0:50:0,72,719:..	0/0:22:22,0:48:0,69,689:..	0/0:22:22,0:48:0,99,989:..	0/0:25:25,0:50:0,135,1349:..	0/0:24:24,0:48:0,75,749:..	0/0:30:30,0:50:0,66,899:..	0/0:21:21,0:50:0,69,689:..	0/0:20:20,0:50:0,66,659:..	0/0:20:20,0:50:0,75,749:..	0/0:20:20,0:50:0,60,599:..	0/0:18:18,0:50:0,75,749:..	0/0:19:19,0:48:0,60,599:..	0/0:20:20,0:48:0,72,719:..	0/0:25:25,0:50:0,75,749:..	0/0:18:18,0:50:0,63,629:..	0/0:25:25,0:48:0,90,899:..	0/1:18:9,9:39:39,0,48:..	0/0:24:24,0:48:0,75,749:..	seq2
chr3	29796726	chr3_29796726_G_T	G	T	44	AF=0.013889;AQ=44	GT:DP:AD:GQ:PL:RNC	0/0:22:22,0:50:0,75,749:..	0/0:24:24,0:48:0,75,749:..	0/0:18:18,0:48:0,69,689:..	0/0:21:21,0:50:0,63,629:..	0/0:22:22,0:50:0,72,719:..	0/0:21:21,0:50:0,66,659:..	0/0:21:21,0:48:0,75,749:..	0/0:19:19,0:48:0,72,719:..	0/0:18:18,0:48:0,66,659:..	0/0:26:26,0:50:0,99,989:..	0/0:24:24,0:48:0,72,719:..	0/0:22:22,0:48:0,93,929:..	0/0:25:25,0:48:0,105,1049:..	0/0:28:28,0:50:0,102,1019:..	0/0:23:23,0:50:0,78,779:..	0/0:18:18,0:50:0,60,599:..	0/0:24:24,0:50:0,72,719:..	0/0:23:23,0:50:0,69,689:..	0/0:23:23,0:39:0,39,629:..	0/0:22:22,0:50:0,75,749:..	0/1:22:10,12:43:44,0,50:..	0/0:22:22,0:48:0,105,1049:..	0/0:20:20,0:50:0,78,779:..	0/0:22:22,0:50:0,72,719:..	0/0:19:19,0:50:0,66,659:..	0/0:21:21,0:48:0,87,869:..	0/0:24:24,0:50:0,75,749:..	0/0:20:20,0:50:0,63,629:..	0/0:26:26,0:50:0,84,839:..	0/0:24:24,0:48:0,72,719:..	0/0:16:16,0:48:0,69,689:..	0/0:22:22,0:48:0,105,1049:..	0/0:19:19,0:50:0,69,689:..	0/0:18:18,0:50:0,69,689:..	0/0:16:16,0:48:0,48,479:..	0/0:20:20,0:48:0,63,629:..	seq2
chr3	30117220	chr3_30117220_T_A	T	A	47	AF=0.013889;AQ=47	GT:DP:AD:GQ:PL:RNC	0/0:18:18,0:50:0,72,719:..	0/0:20:20,0:50:0,93,929:..	0/0:25:25,0:48:0,87,869:..	0/0:19:19,0:48:0,75,749:..	0/0:16:16,0:48:0,48,479:..	0/0:22:22,0:48:0,117,1169:..	0/0:24:24,0:48:0,90,899:..	0/0:19:19,0:50:0,63,629:..	0/0:21:21,0:50:0,66,659:..	0/0:21:21,0:50:0,66,659:..	0/0:18:18,0:50:0,90,899:..	0/0:23:23,0:50:0,69,689:..	0/0:29:29,0:50:0,111,1109:..	0/0:22:22,0:50:0,81,809:..	0/0:21:21,0:50:0,69,689:..	0/0:23:23,0:50:0,75,749:..	0/0:22:22,0:48:0,123,1229:..	0/0:16:16,0:48:0,84,839:..	0/0:21:21,0:48:0,66,659:..	0/0:24:24,0:50:0,75,749:..	0/0:21:21,0:48:0,69,689:..	0/0:23:23,0:50:0,120,1199:..	0/0:24:24,0:50:0,78,1019:..	0/0:23:23,0:50:0,72,719:..	0/0:19:19,0:48:0,75,749:..	0/0:27:27,0:50:0,96,959:..	0/0:24:24,0:50:0,75,989:..	0/0:18:18,0:50:0,75,749:..	0/0:22:22,0:50:0,72,719:..	0/0:19:19,0:50:0,72,719:..	0/0:20:20,0:50:0,72,719:..	0/0:22:22,0:50:0,78,779:..	0/0:26:26,0:48:0,111,1109:..	0/0:22:22,0:50:0,75,749:..	0/0:22:22,0:50:0,72,719:..	0/1:31:12,19:44:47,0,47:..	seq2
chr3	31965461	chr3_31965461_A_G	A	G	42	AF=0.013889;AQ=42	GT:DP:AD:GQ:PL:RNC	0/0:24:24,0:50:0,72,719:..	0/0:22:22,0:50:0,72,719:..	0/0:20:20,0:48:0,75,749:..	0/0:27:27,0:48:0,60,839:..	0/0:22:22,0:50:0,93,929:..	0/0:25:25,0:48:0,78,1019:..	0/0:22:22,0:50:0,75,749:..	0/0:21:21,0:50:0,63,629:..	0/0:16:16,0:48:0,90,899:..	0/1:28:14,14:42:42,0,55:..	0/0:17:17,0:48:0,75,749:..	0/0:24:24,0:48:0,105,1049:..	0/0:23:23,0:48:0,69,689:..	0/0:27:27,0:48:0,99,989:..	0/0:22:22,0:50:0,69,689:..	0/0:21:21,0:48:0,72,719:..	0/0:20:20,0:48:0,63,629:..	0/0:25:25,0:48:0,75,749:..	0/0:14:14,0:42:0,45,449:..	0/0:24:24,0:50:0,99,989:..	0/0:22:22,0:50:0,108,1079:..	0/0:25:25,0:50:0,87,869:..	0/0:20:20,0:50:0,66,659:..	0/0:25:25,0:50:0,93,929:..	0/0:20:20,0:50:0,60,599:..	0/0:23:23,0:50:0,69,689:..	0/0:19:19,0:50:0,102,1019:..	0/0:25:25,0:48:0,75,749:..	0/0:26:26,0:50:0,93,929:..	0/0:27:27,0:50:0,99,989:..	0/0:21:21,0:50:0,111,1109:..	0/0:21:21,0:48:0,90,899:..	0/0:22:22,0:50:0,84,839:..	0/0:23:23,0:48:0,72,719:..	0/0:22:22,0:48:0,69,689:..	0/0:24:24,0:50:0,75,749:..	seq2
chr3	42078102	chr3_42078102_C_A	C	A	44	AF=0.013889;AQ=44	GT:DP:AD:GQ:PL:RNC	0/0:27:27,0:50:0,84,839:..	0/0:18:18,0:50:0,72,719:..	0/0:24:24,0:50:0,120,1199:..	0/0:21:21,0:48:0,72,959:..	0/0:30:30,0:50:0,105,1049:..	0/0:34:34,0:50:0,102,1019:..	0/0:21:21,0:50:0,81,809:..	0/0:24:24,0:48:0,63,869:..	0/0:28:28,0:50:0,90,899:..	0/0:21:21,0:50:0,66,659:..	0/0:24:24,0:50:0,111,1109:..	0/0:24:24,0:50:0,90,899:..	0/0:27:27,0:50:0,87,869:..	0/0:30:30,0:50:0,99,989:..	0/0:30:30,0:50:0,138,1379:..	0/0:23:23,0:48:0,69,689:..	0/0:25:25,0:50:0,111,1109:..	0/0:24:24,0:50:0,72,719:..	0/0:24:24,0:50:0,72,719:..	0/0:20:20,0:48:0,90,899:..	0/0:24:24,0:50:0,72,719:..	0/1:37:17,20:44:44,0,54:..	0/0:24:24,0:50:0,108,1079:..	0/0:28:28,0:50:0,132,1319:..	0/0:23:23,0:48:0,69,689:..	0/0:24:24,0:50:0,87,869:..	0/0:23:23,0:50:0,78,779:..	0/0:25:25,0:50:0,93,929:..	0/0:19:19,0:50:0,72,719:..	0/0:28:28,0:50:0,87,869:..	0/0:24:24,0:50:0,75,749:..	0/0:22:22,0:50:0,84,839:..	0/0:25:25,0:48:0,81,809:..	0/0:23:23,0:50:0,69,689:..	0/0:21:21,0:48:0,78,779:..	0/0:24:24,0:42:0,42,659:..	seq2
chr3	42810868	chr3_42810868_C_G	C	G	35	AF=0.013889;AQ=35	GT:DP:AD:GQ:PL:RNC	0/0:21:21,0:50:0,75,749:..	0/0:16:16,0:48:0,48,479:..	0/0:18:18,0:50:0,63,629:..	0/0:24:24,0:50:0,87,869:..	0/0:20:20,0:50:0,60,599:..	0/0:22:22,0:50:0,75,749:..	0/0:22:22,0:48:0,75,749:..	0/0:18:18,0:48:0,69,689:..	0/0:17:17,0:48:0,57,569:..	0/0:21:21,0:50:0,63,629:..	0/0:24:24,0:50:0,72,719:..	0/0:26:26,0:50:0,93,929:..	0/0:24:24,0:50:0,72,719:..	0/1:40:23,17:35:35,0,52:..	0/0:17:17,0:50:0,57,569:..	0/0:25:25,0:50:0,75,749:..	0/0:20:20,0:48:0,102,1019:..	0/0:16:16,0:48:0,66,659:..	0/0:23:23,0:50:0,75,749:..	0/0:22:22,0:50:0,123,1229:..	0/0:23:23,0:50:0,72,719:..	0/0:30:30,0:50:0,84,1079:..	0/0:16:16,0:48:0,51,509:..	0/0:20:20,0:48:0,60,599:..	0/0:17:17,0:50:0,75,749:..	0/0:23:23,0:50:0,105,1049:..	0/0:21:21,0:50:0,90,899:..	0/0:24:24,0:42:0,42,659:..	0/0:19:19,0:50:0,63,629:..	0/0:19:19,0:50:0,66,659:..	0/0:19:19,0:50:0,63,629:..	0/0:18:18,0:50:0,63,629:..	0/0:23:23,0:48:0,75,749:..	0/0:20:20,0:50:0,69,689:..	0/0:16:16,0:48:0,48,479:..	0/0:24:24,0:48:0,72,719:..	seq2
chr3	44673299	chr3_44673299_G_C	G	C	33	AF=0.013889;AQ=33	GT:DP:AD:GQ:PL:RNC	0/0:19:19,0:50:0,69,689:..	0/0:19:19,0:50:0,99,989:..	0/0:18:18,0:50:0,66,659:..	0/0:24:24,0:50:0,69,929:..	0/0:25:25,0:48:0,75,749:..	0/0:22:22,0:48:0,93,929:..	0/0:22:22,0:50:0,69,689:..	0/0:22:22,0:50:0,69,689:..	0/0:22:22,0:50:0,66,659:..	0/0:24:24,0:48:0,75,749:..	0/0:24:24,0:48:0,75,749:..	0/0:24:24,0:50:0,75,749:..	0/0:23:23,0:50:0,96,959:..	0/0:23:23,0:48:0,75,749:..	0/0:20:20,0:48:0,78,779:..	0/0:22:22,0:50:0,69,689:..	0/0:23:23,0:48:0,90,899:..	0/0:18:18,0:50:0,63,629:..	0/0:25:25,0:50:0,87,869:..	0/0:26:26,0:48:0,81,809:..	0/0:25:25,0:50:0,75,749:..	0/0:24:24,0:50:0,75,749:..	0/0:16:16,0:48:0,69,689:..	0/0:25:25,0:48:0,108,1079:..	0/0:25:25,0:50:0,78,779:..	0/0:26:26,0:50:0,81,809:..	0/1:23:14,9:34:33,0,50:..	0/0:19:19,0:50:0,57,569:..	0/0:23:23,0:48:0,69,689:..	0/0:17:17,0:48:0,78,779:..	0/0:20:20,0:50:0,75,749:..	0/0:19:19,0:50:0,69,689:..	0/0:22:22,0:48:0,69,689:..	0/0:25:25,0:50:0,75,749:..	0/0:23:23,0:50:0,81,809:..	0/0:25:25,0:50:0,102,1019:..	seq2
chr3	46845884	chr3_46845884_C_G	C	G	43	AF=0.013889;AQ=43	GT:DP:AD:GQ:PL:RNC	0/0:18:18,0:50:0,63,629:..	0/0:22:22,0:50:0,66,659:..	0/0:23:23,0:50:0,72,719:..	0/0:17:17,0:50:0,66,659:..	0/0:26:26,0:50:0,96,959:..	0/0:21:21,0:48:0,66,659:..	0/0:23:23,0:39:0,39,629:..	0/0:17:17,0:50:0,78,779:..	0/0:23:23,0:48:0,69,689:..	0/0:17:17,0:50:0,51,509:..	0/0:19:19,0:50:0,63,629:..	0/0:22:22,0:50:0,78,779:..	0/0:22:22,0:50:0,69,689:..	0/0:22:22,0:50:0,78,779:..	0/0:23:23,0:48:0,117,1169:..	0/0:25:25,0:48:0,75,749:..	0/1:37:15,22:43:43,0,51:..	0/0:20:20,0:50:0,75,749:..	0/0:21:21,0:50:0,63,629:..	0/0:19:19,0:50:0,75,749:..	0/0:23:23,0:50:0,75,749:..	0/0:21:21,0:50:0,72,719:..	0/0:24:24,0:48:0,72,719:..	0/0:24:24,0:48:0,72,719:..	0/0:16:16,0:48:0,48,479:..	0/0:25:25,0:50:0,90,899:..	0/0:23:23,0:48:0,120,1199:..	0/0:22:22,0:48:0,66,659:..	0/0:23:23,0:50:0,72,719:..	0/0:22:22,0:50:0,66,659:..	0/0:22:22,0:48:0,102,1019:..	0/0:19:19,0:50:0,60,599:..	0/0:23:23,0:50:0,69,689:..	0/0:24:24,0:50:0,72,719:..	0/0:18:18,0:50:0,66,659:..	0/0:23:23,0:50:0,69,689:..	seq2
chr3	48549196	chr3_48549196_C_T	C	T	43	AF=0.013889;AQ=43	GT:DP:AD:GQ:PL:RNC	0/0:20:20,0:48:0,60,599:..	0/0:18:18,0:50:0,66,659:..	0/0:22:22,0:48:0,78,779:..	0/0:23:23,0:50:0,75,749:..	0/0:25:25,0:48:0,81,809:..	0/1:28:5,23:26:43,0,26:..	0/0:16:16,0:48:0,63,629:..	0/0:18:18,0:50:0,60,599:..	0/0:18:18,0:50:0,57,569:..	0/0:32:32,0:50:0,123,1229:..	0/0:23:23,0:50:0,87,869:..	0/0:22:22,0:50:0,57,809:..	0/0:16:16,0:48:0,48,479:..	0/0:25:25,0:50:0,75,749:..	0/0:31:31,0:50:0,102,1019:..	0/0:20:20,0:50:0,60,599:..	0/0:27:27,0:50:0,87,869:..	0/0:20:20,0:50:0,63,629:..	0/0:16:16,0:48:0,75,749:..	0/0:22:22,0:48:0,78,779:..	0/0:24:24,0:50:0,78,779:..	0/0:35:35,0:50:0,81,1049:..	0/0:18:18,0:48:0,72,719:..	0/0:22:22,0:50:0,105,1049:..	0/0:11:11,0:33:0,33,329:..	0/0:20:20,0:50:0,72,719:..	0/0:21:21,0:50:0,75,749:..	0/0:21:21,0:48:0,48,719:..	0/0:23:23,0:50:0,72,719:..	0/0:21:21,0:48:0,105,1049:..	0/0:22:22,0:48:0,105,1049:..	0/0:14:14,0:42:0,45,449:..	0/0:16:16,0:48:0,60,599:..	0/0:21:21,0:50:0,78,779:..	0/0:18:18,0:48:0,54,539:..	0/0:24:24,0:42:0,42,659:..	seq2
chr3	49152554	chr3_49152554_T_G	T	G	27	AF=0.013889;AQ=27	GT:DP:AD:GQ:PL:RNC	0/0:17:17,0:50:0,51,509:..	0/0:17:17,0:50:0,51,509:..	0/0:23:23,0:50:0,72,719:..	0/0:9:9,0:27:0,27,269:..	0/1:22:15,7:27:27,0,47:..	0/0:10:10,0:30:0,30,299:..	0/0:15:15,0:45:0,45,449:..	0/0:13:13,0:39:0,39,389:..	0/0:12:12,0:36:0,39,389:..	0/0:16:16,0:48:0,48,479:..	0/0:14:14,0:42:0,42,419:..	0/0:16:16,0:48:0,54,539:..	0/0:18:18,0:50:0,54,539:..	0/0:7:7,0:21:0,24,239:..	0/0:14:14,0:42:0,42,419:..	0/0:17:17,0:50:0,51,509:..	0/0:14:14,0:42:0,42,419:..	0/0:16:16,0:48:0,48,479:..	0/0:13:13,0:39:0,39,389:..	0/0:19:19,0:50:0,57,569:..	0/0:19:19,0:27:0,27,509:..	0/0:15:15,0:45:0,45,449:..	0/0:12:12,0:36:0,36,359:..	0/0:16:16,0:48:0,57,569:..	0/0:11:11,0:33:0,33,329:..	0/0:18:18,0:24:0,24,479:..	0/0:18:18,0:50:0,54,539:..	0/0:14:14,0:42:0,42,419:..	0/0:14:14,0:42:0,42,419:..	0/0:16:16,0:48:0,48,479:..	0/0:18:18,0:24:0,24,479:..	0/0:17:17,0:50:0,51,509:..	0/0:19:19,0:50:0,60,599:..	0/0:16:16,0:48:0,48,479:..	0/0:16:16,0:48:0,48,479:..	0/0:13:13,0:39:0,39,389:..	seq2
chr3	58769571	chr3_58769571_T_A	T	A	34	AF=0.013889;AQ=34	GT:DP:AD:GQ:PL:RNC	0/0:16:16,0:48:0,48,479:..	0/0:23:23,0:50:0,69,689:..	0/0:25:25,0:50:0,75,749:..	0/0:23:23,0:50:0,72,719:..	0/0:23:23,0:50:0,78,779:..	0/0:25:25,0:48:0,78,779:..	0/0:17:17,0:50:0,63,629:..	0/0:22:22,0:50:0,87,869:..	0/0:17:17,0:50:0,51,509:..	0/0:23:23,0:48:0,90,899:..	0/0:21:21,0:50:0,75,749:..	0/0:21:21,0:50:0,66,659:..	0/0:16:16,0:48:0,72,719:..	0/0:18:18,0:50:0,54,539:..	0/0:25:25,0:48:0,75,749:..	0/0:23:23,0:48:0,78,779:..	0/0:22:22,0:50:0,96,959:..	0/0:25:25,0:48:0,75,749:..	0/0:23:23,0:48:0,75,749:..	0/0:26:26,0:50:0,87,869:..	0/0:23:23,0:48:0,72,719:..	0/1:29:17,12:35:34,0,52:..	0/0:16:16,0:48:0,57,569:..	0/0:21:21,0:50:0,63,629:..	0/0:21:21,0:50:0,84,839:..	0/0:21:21,0:50:0,63,629:..	0/0:19:19,0:50:0,75,749:..	0/0:24:24,0:48:0,75,749:..	0/0:21:21,0:48:0,75,749:..	0/0:23:23,0:48:0,78,779:..	0/0:24:24,0:48:0,78,779:..	0/0:16:16,0:48:0,57,569:..	0/0:25:25,0:50:0,75,749:..	0/0:22:22,0:48:0,75,749:..	0/0:21:21,0:50:0,75,749:..	0/0:17:17,0:50:0,75,749:..	seq2
chr3	59478850	chr3_59478850_C_T	C	T	46	AF=0.013889;AQ=46	GT:DP:AD:GQ:PL:RNC	0/0:18:18,0:50:0,69,689:..	0/0:21:21,0:50:0,87,869:..	0/0:22:22,0:50:0,72,719:..	0/0:18:18,0:50:0,84,839:..	0/0:19:19,0:48:0,93,929:..	0/0:21:21,0:48:0,93,929:..	0/0:24:24,0:48:0,75,749:..	0/0:20:20,0:50:0,66,659:..	0/0:21:21,0:50:0,63,629:..	0/0:24:24,0:50:0,99,989:..	0/0:17:17,0:50:0,51,509:..	0/1:22:11,11:46:46,0,55:..	0/0:24:24,0:50:0,72,719:..	0/0:22:22,0:48:0,75,749:..	0/0:21:21,0:48:0,99,989:..	0/0:24:24,0:50:0,75,749:..	0/0:22:22,0:50:0,72,719:..	0/0:21:21,0:48:0,72,719:..	0/0:19:19,0:50:0,63,629:..	0/0:16:16,0:48:0,54,539:..	0/0:21:21,0:50:0,90,899:..	0/0:25:25,0:50:0,99,989:..	0/0:16:16,0:48:0,60,599:..	0/0:20:20,0:50:0,105,1049:..	0/0:25:25,0:50:0,75,749:..	0/0:25:25,0:50:0,75,749:..	0/0:24:24,0:48:0,72,719:..	0/0:16:16,0:48:0,48,479:..	0/0:24:24,0:50:0,87,869:..	0/0:21:21,0:50:0,69,689:..	0/0:12:12,0:36:0,39,389:..	0/0:30:30,0:50:0,102,1019:..	0/0:22:22,0:48:0,78,779:..	0/0:23:23,0:50:0,75,749:..	0/0:21:21,0:50:0,75,749:..	0/0:16:16,0:48:0,48,479:..	seq2
chr3	65188787	chr3_65188787_C_A	C	A	29	AF=0.013889;AQ=29	GT:DP:AD:GQ:PL:RNC	0/0:19:19,0:48:0,63,629:..	0/0:24:24,0:50:0,75,749:..	0/0:21:21,0:48:0,72,719:..	0/0:18:18,0:50:0,63,629:..	0/0:20:20,0:50:0,60,599:..	0/0:30:30,0:48:0,93,929:..	0/0:23:23,0:50:0,72,719:..	0/0:21:21,0:48:0,72,719:..	0/0:22:22,0:50:0,72,719:..	0/0:26:26,0:50:0,84,839:..	0/0:17:17,0:50:0,66,659:..	0/1:41:27,14:30:29,0,50:..	0/0:18:18,0:48:0,72,719:..	0/0:19:19,0:48:0,78,779:..	0/0:20:20,0:48:0,96,959:..	0/0:17:17,0:48:0,81,809:..	0/0:24:24,0:48:0,75,989:..	0/0:24:24,0:50:0,75,749:..	0/0:22:22,0:48:0,66,659:..	0/0:32:32,0:50:0,96,959:..	0/0:25:25,0:50:0,75,749:..	0/0:25:25,0:50:0,78,779:..	0/0:17:17,0:50:0,75,749:..	0/0:23:23,0:48:0,72,719:..	0/0:23:23,0:48:0,78,779:..	0/0:18:18,0:50:0,66,659:..	0/0:17:17,0:50:0,63,629:..	0/0:21:21,0:50:0,66,659:..	0/0:17:17,0:48:0,75,749:..	0/0:23:23,0:50:0,102,1019:..	0/0:20:20,0:50:0,75,749:..	0/0:16:16,0:48:0,72,719:..	0/0:18:18,0:50:0,63,629:..	0/0:20:20,0:50:0,69,689:..	0/0:20:20,0:50:0,72,719:..	0/0:17:17,0:48:0,57,569:..	seq2
chr3	67354197	chr3_67354197_G_A	G	A	42	AF=0.013889;AQ=42	GT:DP:AD:GQ:PL:RNC	0/0:21:21,0:48:0,72,719:..	0/0:20:20,0:48:0,63,629:..	0/0:22:22,0:48:0,78,779:..	0/0:19:19,0:50:0,81,809:..	0/0:20:20,0:50:0,63,629:..	0/0:26:26,0:48:0,90,899:..	0/0:18:18,0:50:0,54,539:..	0/0:21:21,0:50:0,63,629:..	0/0:18:18,0:50:0,63,629:..	0/0:24:24,0:48:0,99,989:..	0/0:19:19,0:48:0,63,629:..	0/0:20:20,0:50:0,66,659:..	0/0:23:23,0:48:0,75,749:..	0/0:21:21,0:50:0,63,629:..	0/0:23:23,0:48:0,87,869:..	0/0:22:22,0:48:0,93,929:..	0/0:24:24,0:48:0,75,749:..	0/0:16:16,0:48:0,51,509:..	0/0:20:20,0:50:0,72,719:..	0/0:27:27,0:48:0,90,899:..	0/0:16:16,0:48:0,48,479:..	0/0:24:24,0:48:0,102,1019:..	0/0:15:15,0:45:0,45,449:..	0/0:25:25,0:50:0,129,1289:..	0/0:24:24,0:48:0,75,749:..	0/0:17:17,0:50:0,57,569:..	0/0:25:25,0:50:0,99,989:..	0/0:16:16,0:48:0,90,899:..	0/0:24:24,0:48:0,120,1199:..	0/0:16:16,0:48:0,48,479:..	0/0:22:22,0:50:0,102,1019:..	0/0:21:21,0:50:0,69,689:..	0/0:19:19,0:50:0,99,989:..	0/0:13:13,0:39:0,39,389:..	0/0:23:23,0:50:0,69,689:..	0/1:22:12,10:42:42,0,55:..	seq2
chr3	67599593	chr3_67599593_T_A	T	A	24	AF=0.013889;AQ=24	GT:DP:AD:GQ:PL:RNC	0/0:16:16,0:48:0,48,479:..	0/0:19:19,0:50:0,57,569:..	0/0:21:21,0:48:0,69,689:..	0/0:19:19,0:50:0,72,719:..	0/0:23:23,0:48:0,78,779:..	0/0:13:13,0:39:0,39,389:..	0/0:22:22,0:50:0,69,689:..	0/0:19:19,0:50:0,63,629:..	0/0:18:18,0:48:0,63,629:..	0/0:21:21,0:48:0,66,659:..	0/0:24:24,0:48:0,75,749:..	0/1:28:17,11:25:24,0,35:..	0/0:18:18,0:50:0,57,569:..	0/0:22:22,0:48:0,84,839:..	0/0:16:16,0:48:0,72,719:..	0/0:16:16,0:48:0,78,779:..	0/0:21:21,0:50:0,75,749:..	0/0:22:22,0:50:0,75,749:..	0/0:18:18,0:50:0,54,539:..	0/0:23:23,0:50:0,69,689:..	0/0:17:17,0:48:0,75,749:..	0/0:20:20,0:50:0,75,749:..	0/0:20:20,0:50:0,66,659:..	0/0:19:19,0:50:0,57,569:..	0/0:19:19,0:50:0,78,779:..	0/0:20:20,0:50:0,75,749:..	0/0:20:20,0:50:0,63,629:..	0/0:16:16,0:48:0,102,1019:..	0/0:23:23,0:48:0,99,989:..	0/0:14:14,0:42:0,45,449:..	0/0:19:19,0:50:0,63,629:..	0/0:16:16,0:48:0,48,479:..	0/0:22:22,0:50:0,72,719:..	0/0:24:24,0:50:0,75,749:..	0/0:18:18,0:50:0,54,539:..	0/0:20:20,0:50:0,72,719:..	seq2
chr3	72155165	chr3_72155165_G_T	G	T	39	AF=0.013889;AQ=39	GT:DP:AD:GQ:PL:RNC	0/0:22:22,0:50:0,72,719:..	0/0:16:16,0:48:0,54,539:..	0/0:16:16,0:48:0,63,629:..	0/1:29:14,15:39:39,0,50:..	0/0:25:25,0:48:0,75,749:..	0/0:23:23,0:50:0,90,899:..	0/0:19:19,0:48:0,60,599:..	0/0:23:23,0:50:0,72,719:..	0/0:16:16,0:48:0,54,539:..	0/0:22:22,0:50:0,105,1049:..	0/0:21:21,0:50:0,69,689:..	0/0:23:23,0:48:0,90,899:..	0/0:19:19,0:50:0,108,1079:..	0/0:25:25,0:50:0,75,749:..	0/0:20:20,0:50:0,69,689:..	0/0:16:16,0:48:0,72,719:..	0/0:24:24,0:42:0,42,659:..	0/0:21:21,0:48:0,63,629:..	0/0:23:23,0:39:0,39,629:..	0/0:22:22,0:50:0,78,779:..	0/0:16:16,0:48:0,66,659:..	0/0:20:20,0:50:0,111,1109:..	0/0:20:20,0:50:0,75,749:..	0/0:30:30,0:50:0,129,1289:..	0/0:16:16,0:48:0,63,629:..	0/0:18:18,0:50:0,81,809:..	0/0:22:22,0:50:0,114,1139:..	0/0:24:24,0:48:0,81,809:..	0/0:20:20,0:48:0,78,779:..	0/0:24:24,0:50:0,78,779:..	0/0:17:17,0:48:0,75,749:..	0/0:22:22,0:50:0,75,749:..	0/0:25:25,0:48:0,78,779:..	0/0:18:18,0:50:0,75,749:..	0/0:20:20,0:48:0,60,599:..	0/0:16:16,0:48:0,60,599:..	seq2
chr3	84729996	chr3_84729996_A_G	A	G	31	AF=0.013889;AQ=31	GT:DP:AD:GQ:PL:RNC	0/0:20:20,0:50:0,60,599:..	0/0:16:16,0:48:0,51,509:..	0/0:21:21,0:50:0,81,809:..	0/0:23:23,0:50:0,69,689:..	0/0:23:23,0:50:0,75,749:..	0/0:27:27,0:50:0,81,809:..	0/0:24:24,0:48:0,72,719:..	0/0:25:25,0:50:0,75,749:..	0/1:41:26,14:32:31,0,50:..	0/0:30:30,0:50:0,99,989:..	0/0:21:21,0:50:0,69,689:..	0/0:25:25,0:48:0,75,749:..	0/0:24:24,0:50:0,78,779:..	0/0:25:25,0:50:0,75,749:..	0/0:26:26,0:50:0,87,1109:..	0/0:22:22,0:48:0,75,749:..	0/0:24:24,0:50:0,84,839:..	0/0:23:23,0:48:0,69,689:..	0/0:33:33,0:50:0,99,989:..	0/0:16:16,0:48:0,51,509:..	0/0:23:23,0:50:0,69,689:..	0/0:26:26,0:50:0,81,809:..	0/0:22:22,0:50:0,66,659:..	0/0:25:25,0:50:0,90,899:..	0/0:24:24,0:50:0,72,719:..	0/0:21:21,0:48:0,72,719:..	0/0:31:31,0:50:0,102,1019:..	0/0:19:19,0:50:0,66,659:..	0/0:17:17,0:50:0,57,569:..	0/0:18:18,0:50:0,72,719:..	0/0:26:26,0:50:0,99,989:..	0/0:21:21,0:48:0,66,659:..	0/0:16:16,0:48:0,69,689:..	0/0:22:22,0:50:0,72,719:..	0/0:24:24,0:50:0,72,719:..	0/0:32:32,0:50:0,99,989:..	seq2
chr3	88062392	chr3_88062392_A_C	A	C	43	AF=0.013889;AQ=43	GT:DP:AD:GQ:PL:RNC	0/0:18:18,0:48:0,63,629:..	0/0:27:27,0:50:0,93,929:..	0/0:22:22,0:50:0,75,749:..	0/0:25:25,0:50:0,51,749:..	0/0:29:29,0:50:0,108,1079:..	0/0:20:20,0:50:0,87,869:..	0/0:21:21,0:50:0,96,959:..	0/0:20:20,0:50:0,96,959:..	0/0:22:22,0:48:0,75,749:..	0/0:23:23,0:48:0,69,689:..	0/0:17:17,0:50:0,63,629:..	0/0:25:25,0:50:0,81,809:..	0/0:17:17,0:50:0,69,689:..	0/0:24:24,0:48:0,93,929:..	0/1:31:14,17:43:43,0,53:..	0/0:22:22,0:48:0,102,1019:..	0/0:27:27,0:50:0,60,839:..	0/0:22:22,0:48:0,99,989:..	0/0:20:20,0:50:0,63,629:..	0/0:20:20,0:50:0,78,1019:..	0/0:23:23,0:48:0,99,989:..	0/0:28:28,0:50:0,96,959:..	0/0:21:21,0:48:0,99,989:..	0/0:29:29,0:50:0,96,959:..	0/0:19:19,0:50:0,69,929:..	0/0:24:24,0:48:0,75,749:..	0/0:31:31,0:48:0,75,989:..	0/0:22:22,0:48:0,72,719:..	0/0:24:24,0:50:0,75,749:..	0/0:24:24,0:48:0,72,719:..	0/0:23:23,0:50:0,105,1049:..	0/0:23:23,0:48:0,78,779:..	0/0:24:24,0:50:0,84,839:..	0/0:23:23,0:50:0,102,1019:..	0/0:25:25,0:50:0,84,839:..	0/0:24:24,0:50:0,72,719:..	seq2
chr3	89253777	chr3_89253777_G_T	G	T	35	AF=0.013889;AQ=35	GT:DP:AD:GQ:PL:RNC	0/0:16:16,0:48:0,48,479:..	0/0:22:22,0:48:0,72,719:..	0/0:21:21,0:48:0,72,719:..	0/0:23:23,0:50:0,78,779:..	0/0:24:24,0:50:0,129,1289:..	0/0:23:23,0:50:0,87,869:..	0/0:21:21,0:50:0,63,629:..	0/0:24:24,0:50:0,75,749:..	0/0:21:21,0:50:0,69,689:..	0/0:28:28,0:50:0,105,1049:..	0/0:22:22,0:50:0,72,719:..	0/0:22:22,0:48:0,66,659:..	0/0:24:24,0:48:0,75,749:..	0/0:20:20,0:50:0,66,659:..	0/0:23:23,0:50:0,96,959:..	0/0:24:24,0:48:0,72,719:..	0/0:25:25,0:48:0,75,749:..	0/0:16:16,0:48:0,48,479:..	0/0:20:20,0:48:0,60,599:..	0/0:23:23,0:50:0,75,749:..	0/0:20:20,0:50:0,66,659:..	0/0:23:23,0:50:0,69,689:..	0/0:16:16,0:48:0,48,479:..	0/0:28:28,0:50:0,84,839:..	0/0:25:25,0:50:0,78,779:..	0/1:23:14,9:35:35,0,50:..	0/0:33:33,0:50:0,99,989:..	0/0:21:21,0:48:0,63,629:..	0/0:18:18,0:50:0,69,689:..	0/0:23:23,0:48:0,72,719:..	0/0:26:26,0:50:0,132,1319:..	0/0:23:23,0:50:0,72,719:..	0/0:24:24,0:50:0,72,719:..	0/0:24:24,0:50:0,72,719:..	0/0:23:23,0:48:0,69,689:..	0/0:23:23,0:48:0,93,929:..	seq2
chr3	96927713	chr3_96927713_C_T	C	T	42	AF=0.013889;AQ=42	GT:DP:AD:GQ:PL:RNC	0/0:23:23,0:48:0,75,749:..	0/0:20:20,0:50:0,63,869:..	0/0:24:24,0:50:0,90,899:..	0/0:19:19,0:48:0,60,599:..	0/0:29:29,0:50:0,96,959:..	0/0:22:22,0:50:0,99,989:..	0/0:18:18,0:50:0,69,689:..	0/0:16:16,0:48:0,102,1019:..	0/0:22:22,0:50:0,72,719:..	0/0:21:21,0:50:0,69,689:..	0/0:23:23,0:50:0,105,1049:..	0/0:25:25,0:50:0,105,1049:..	0/0:24:24,0:50:0,93,929:..	0/0:26:26,0:50:0,108,1079:..	0/0:36:36,0:50:0,111,1109:..	0/0:25:25,0:50:0,75,749:..	0/0:25:25,0:50:0,105,1049:..	0/0:26:26,0:50:0,93,929:..	0/0:22:22,0:50:0,66,659:..	0/0:25:25,0:50:0,60,839:..	0/0:22:22,0:50:0,105,1049:..	0/1:34:17,17:42:42,0,50:..	0/0:21:21,0:50:0,66,659:..	0/0:23:23,0:50:0,69,689:..	0/0:23:23,0:50:0,72,719:..	0/0:22:22,0:48:0,75,749:..	0/0:28:28,0:50:0,84,839:..	0/0:19:19,0:50:0,63,629:..	0/0:25:25,0:48:0,75,749:..	0/0:24:24,0:50:0,75,749:..	0/0:30:30,0:48:0,69,929:..	0/0:21:21,0:50:0,111,1109:..	0/0:24:24,0:50:0,51,749:..	0/0:29:29,0:50:0,90,899:..	0/0:21:21,0:50:0,69,689:..	0/0:24:24,0:50:0,102,1019:..	seq2
chr3	101675947	chr3_101675947_A_T	A	T	33	AF=0.013889;AQ=33	GT:DP:AD:GQ:PL:RNC	0/0:29:29,0:50:0,87,869:..	0/0:21:21,0:50:0,69,689:..	0/0:18:18,0:50:0,60,599:..	0/0:19:19,0:27:0,27,509:..	0/0:21:21,0:50:0,63,629:..	0/0:18:18,0:50:0,63,629:..	0/0:19:19,0:50:0,60,599:..	0/0:24:24,0:50:0,72,719:..	0/0:17:17,0:50:0,54,539:..	0/0:22:22,0:50:0,72,719:..	0/0:27:27,0:21:0,21,689:..	0/0:27:27,0:50:0,84,839:..	0/0:17:17,0:50:0,54,539:..	0/0:28:28,0:50:0,84,839:..	0/0:34:34,0:50:0,81,1049:..	0/0:27:27,0:50:0,87,869:..	0/0:21:21,0:50:0,66,659:..	0/0:31:31,0:50:0,93,929:..	0/0:19:19,0:50:0,60,599:..	0/0:22:22,0:50:0,66,659:..	0/0:26:26,0:50:0,78,779:..	0/0:16:16,0:48:0,48,479:..	0/0:21:21,0:50:0,63,629:..	0/0:28:28,0:50:0,96,959:..	0/0:16:16,0:48:0,51,509:..	0/0:28:28,0:50:0,87,869:..	0/0:27:27,0:50:0,87,869:..	0/1:26:12,14:34:33,0,49:..	0/0:19:19,0:50:0,57,569:..	0/0:19:19,0:27:0,27,509:..	0/0:32:32,0:50:0,111,1109:..	0/0:23:23,0:50:0,75,749:..	0/0:28:28,0:50:0,54,779:..	0/0:25:25,0:48:0,90,899:..	0/0:22:22,0:50:0,69,689:..	0/0:23:23,0:50:0,93,929:..	seq2
chr3	102259335	chr3_102259335_C_T	C	T	43	AF=0.013889;AQ=43	GT:DP:AD:GQ:PL:RNC	0/0:25:25,0:50:0,99,989:..	0/0:24:24,0:48:0,90,899:..	0/0:25:25,0:48:0,90,899:..	0/0:18:18,0:50:0,60,599:..	0/0:26:26,0:48:0,90,899:..	0/0:21:21,0:48:0,72,719:..	0/0:17:17,0:50:0,75,749:..	0/0:21:21,0:48:0,81,809:..	0/0:19:19,0:50:0,72,719:..	0/0:20:20,0:50:0,75,749:..	0/0:25:25,0:50:0,96,959:..	0/0:25:25,0:50:0,84,839:..	0/0:28:28,0:50:0,96,959:..	0/0:22:22,0:50:0,120,1199:..	0/0:24:24,0:50:0,138,1379:..	0/0:18:18,0:48:0,57,569:..	0/0:23:23,0:50:0,72,719:..	0/0:25:25,0:50:0,75,989:..	0/0:19:19,0:50:0,69,689:..	0/0:30:30,0:48:0,99,989:..	0/0:20:20,0:50:0,78,779:..	0/0:21:21,0:50:0,90,899:..	0/0:16:16,0:48:0,75,749:..	0/0:19:19,0:50:0,138,1379:..	0/0:16:16,0:48:0,48,479:..	0/0:21:21,0:50:0,66,659:..	0/0:23:23,0:48:0,87,869:..	0/0:23:23,0:48:0,75,749:..	0/0:18:18,0:48:0,69,689:..	0/0:20:20,0:50:0,63,629:..	0/0:19:19,0:48:0,87,869:..	0/0:22:22,0:50:0,69,689:..	0/0:24:24,0:50:0,99,989:..	0/1:34:17,17:43:43,0,53:..	0/0:19:19,0:50:0,72,719:..	0/0:24:24,0:48:0,93,929:..	seq2
chr3	107643231	chr3_107643231_G_T	G	T	40	AF=0.013889;AQ=40	GT:DP:AD:GQ:PL:RNC	0/0:23:23,0:48:0,78,779:..	0/0:25:25,0:48:0,75,749:..	0/0:31:31,0:48:0,99,989:..	0/0:36:36,0:50:0,111,1109:..	0/0:22:22,0:48:0,117,1169:..	0/0:22:22,0:50:0,69,689:..	0/0:29:29,0:48:0,105,1049:..	0/0:23:23,0:48:0,90,899:..	0/0:23:23,0:50:0,75,749:..	0/0:30:30,0:50:0,93,929:..	0/0:27:27,0:50:0,90,899:..	0/0:44:44,0:50:0,138,1379:..	0/1:25:14,11:40:40,0,50:..	0/0:26:26,0:48:0,99,989:..	0/0:23:23,0:48:0,87,869:..	0/0:22:22,0:48:0,69,689:..	0/0:26:26,0:50:0,114,1139:..	0/0:24:24,0:48:0,90,899:..	0/0:14:14,0:42:0,42,419:..	0/0:24:24,0:50:0,72,719:..	0/0:21:21,0:50:0,66,659:..	0/0:24:24,0:50:0,105,1049:..	0/0:21:21,0:50:0,99,989:..	0/0:34:34,0:50:0,102,1019:..	0/0:16:16,0:48:0,48,479:..	0/0:25:25,0:50:0,87,869:..	0/0:30:30,0:50:0,90,899:..	0/0:20:20,0:50:0,66,659:..	0/0:26:26,0:50:0,63,869:..	0/0:24:24,0:50:0,75,749:..	0/0:23:23,0:48:0,84,839:..	0/0:31:31,0:50:0,93,929:..	0/0:26:26,0:50:0,102,1019:..	0/0:28:28,0:50:0,84,839:..	0/0:24:24,0:50:0,81,809:..	0/0:30:30,0:50:0,102,1019:..	seq2
chr3	112911024	chr3_112911024_G_A	G	A	11	AF=0.013889;AQ=11	GT:DP:AD:GQ:PL:RNC	0/0:18:18,0:50:0,63,629:..	0/0:18:18,0:50:0,54,539:..	0/0:22:22,0:50:0,72,719:..	0/0:19:19,0:50:0,63,629:..	0/0:18:18,0:50:0,69,689:..	0/0:32:32,0:50:0,99,989:..	0/1:29:23,6:12:11,0,40:..	0/0:21:21,0:50:0,69,689:..	0/0:19:19,0:50:0,60,599:..	0/0:24:24,0:48:0,129,1289:..	0/0:20:20,0:50:0,60,599:..	0/0:19:19,0:50:0,57,569:..	0/0:26:26,0:50:0,99,989:..	0/0:23:23,0:48:0,102,1019:..	0/0:20:20,0:50:0,60,599:..	0/0:28:28,0:50:0,108,1079:..	0/0:19:19,0:50:0,72,719:..	0/0:19:19,0:50:0,66,659:..	0/0:19:19,0:50:0,57,569:..	0/0:23:23,0:48:0,72,719:..	0/0:21:21,0:50:0,78,779:..	0/0:28:28,0:50:0,108,1079:..	0/0:25:25,0:50:0,81,809:..	0/0:27:27,0:50:0,84,839:..	0/0:22:22,0:50:0,75,749:..	0/0:24:24,0:50:0,78,779:..	0/0:18:18,0:50:0,63,629:..	0/0:23:23,0:50:0,72,719:..	0/0:20:20,0:50:0,87,869:..	0/0:32:32,0:50:0,102,1019:..	0/0:32:32,0:50:0,132,1319:..	0/0:18:18,0:50:0,60,599:..	0/0:23:23,0:50:0,75,749:..	0/0:25:25,0:48:0,78,779:..	0/0:19:19,0:50:0,60,599:..	0/0:16:16,0:48:0,54,539:..	seq2
chr3	112951872	chr3_112951872_G_A	G	A	23	AF=0.013889;AQ=23	GT:DP:AD:GQ:PL:RNC	0/0:19:19,0:48:0,72,719:..	0/0:16:16,0:48:0,48,479:..	0/0:16:16,0:48:0,60,599:..	0/0:14:14,0:42:0,45,449:..	0/0:17:17,0:48:0,60,599:..	0/0:25:25,0:48:0,75,749:..	0/0:22:22,0:50:0,66,659:..	0/0:16:16,0:48:0,75,749:..	0/0:16:16,0:48:0,69,689:..	0/0:25:25,0:50:0,147,1469:..	0/0:26:26,0:50:0,90,899:..	0/0:19:19,0:50:0,78,779:..	0/0:23:23,0:48:0,69,689:..	0/0:17:17,0:50:0,75,749:..	0/0:16:16,0:48:0,66,659:..	0/0:17:17,0:50:0,69,689:..	0/0:23:23,0:50:0,69,689:..	0/0:18:18,0:48:0,75,749:..	0/0:16:16,0:48:0,57,569:..	0/0:21:21,0:50:0,63,629:..	0/0:23:23,0:50:0,72,719:..	0/0:25:25,0:50:0,75,749:..	0/1:24:18,6:24:23,0,48:..	0/0:24:24,0:48:0,72,719:..	0/0:21:21,0:50:0,69,689:..	0/0:21:21,0:50:0,72,719:..	0/0:24:24,0:50:0,102,1019:..	0/0:22:22,0:48:0,75,749:..	0/0:20:20,0:50:0,63,629:..	0/0:21:21,0:50:0,69,689:..	0/0:25:25,0:48:0,96,959:..	0/0:24:24,0:50:0,72,719:..	0/0:19:19,0:50:0,72,719:..	0/0:16:16,0:48:0,48,479:..	0/0:28:28,0:50:0,84,839:..	0/0:18:18,0:50:0,69,689:..	seq2
chr3	118570480	chr3_118570480_A_G	A	G	30	AF=0.013889;AQ=30	GT:DP:AD:GQ:PL:RNC	0/0:21:21,0:50:0,69,689:..	0/0:17:17,0:48:0,75,749:..	0/0:18:18,0:50:0,54,539:..	0/0:21:21,0:50:0,69,689:..	0/0:18:18,0:50:0,69,689:..	0/0:16:16,0:48:0,60,599:..	0/0:19:19,0:50:0,72,719:..	0/0:18:18,0:50:0,60,599:..	0/0:21:21,0:48:0,72,719:..	0/0:22:22,0:50:0,69,689:..	0/0:17:17,0:50:0,63,629:..	0/0:23:23,0:50:0,75,749:..	0/0:16:16,0:48:0,51,509:..	0/0:12:12,0:7:0,6,299:..	0/0:26:26,0:50:0,123,1229:..	0/0:16:16,0:48:0,60,599:..	0/0:22:22,0:50:0,75,749:..	0/1:20:14,6:30:30,0,46:..	0/0:17:17,0:50:0,51,509:..	0/0:16:16,0:48:0,57,569:..	0/0:16:16,0:48:0,48,479:..	0/0:32:32,0:50:0,132,1319:..	0/0:20:20,0:50:0,63,629:..	0/0:17:17,0:50:0,75,749:..	0/0:19:19,0:50:0,69,689:..	0/0:24:24,0:50:0,72,719:..	0/0:21:21,0:48:0,72,719:..	0/0:21:21,0:33:0,33,569:..	0/0:21:21,0:50:0,63,629:..	0/0:11:11,0:33:0,33,329:..	0/0:27:27,0:50:0,102,1019:..	0/0:16:16,0:48:0,48,479:..	0/0:23:23,0:50:0,72,719:..	0/0:28:28,0:50:0,96,959:..	0/0:18:18,0:50:0,63,629:..	0/0:29:29,0:50:0,93,929:..	seq2
chr3	133332785	chr3_133332785_A_T	A	T	40	AF=0.013889;AQ=40	GT:DP:AD:GQ:PL:RNC	0/0:22:22,0:50:0,69,689:..	0/0:22:22,0:50:0,72,719:..	0/0:19:19,0:50:0,69,689:..	0/0:16:16,0:48:0,48,479:..	0/0:22:22,0:50:0,78,779:..	0/0:21:21,0:48:0,69,689:..	0/0:21:21,0:50:0,66,659:..	0/0:18:18,0:50:0,63,629:..	0/0:19:19,0:50:0,63,629:..	0/0:16:16,0:48:0,51,509:..	0/0:23:23,0:50:0,72,719:..	0/0:23:23,0:48:0,87,869:..	0/0:22:22,0:48:0,93,929:..	0/0:22:22,0:48:0,72,959:..	0/0:27:27,0:50:0,81,809:..	0/0:16:16,0:48:0,51,509:..	0/0:20:20,0:50:0,63,629:..	0/0:20:20,0:50:0,69,689:..	0/0:16:16,0:48:0,60,599:..	0/0:18:18,0:50:0,60,599:..	0/0:16:16,0:48:0,60,599:..	0/0:25:25,0:48:0,87,869:..	0/0:16:16,0:48:0,51,509:..	0/0:32:32,0:50:0,114,1139:..	0/0:20:20,0:48:0,81,809:..	0/0:23:23,0:50:0,72,719:..	0/0:21:21,0:50:0,75,749:..	0/1:26:15,11:40:40,0,53:..	0/0:21:21,0:50:0,69,689:..	0/0:23:23,0:50:0,78,779:..	0/0:24:24,0:48:0,72,719:..	0/0:18:18,0:50:0,57,569:..	0/0:21:21,0:50:0,63,629:..	0/0:24:24,0:48:0,75,749:..	0/0:18:18,0:50:0,57,569:..	0/0:25:25,0:50:0,78,779:..	seq2
chr3	133597606	chr3_133597606_C_T	C	T	39	AF=0.013889;AQ=39	GT:DP:AD:GQ:PL:RNC	0/0:20:20,0:50:0,63,629:..	0/0:16:16,0:48:0,48,479:..	0/0:21:21,0:50:0,84,839:..	0/0:17:17,0:50:0,54,539:..	0/0:22:22,0:48:0,75,749:..	0/0:21:21,0:48:0,72,719:..	0/0:19:19,0:50:0,57,569:..	0/0:16:16,0:48:0,63,629:..	0/1:23:12,11:39:39,0,54:..	0/0:22:22,0:48:0,90,899:..	0/0:20:20,0:50:0,69,689:..	0/0:20:20,0:48:0,63,629:..	0/0:16:16,0:48:0,60,599:..	0/0:23:23,0:50:0,84,839:..	0/0:16:16,0:48:0,66,659:..	0/0:18:18,0:50:0,72,719:..	0/0:19:19,0:50:0,123,1229:..	0/0:20:20,0:50:0,72,719:..	0/0:24:24,0:48:0,96,959:..	0/0:20:20,0:50:0,60,599:..	0/0:22:22,0:48:0,81,809:..	0/0:25:25,0:50:0,93,929:..	0/0:22:22,0:48:0,75,749:..	0/0:17:17,0:50:0,66,659:..	0/0:16:16,0:48:0,75,749:..	0/0:16:16,0:48:0,48,479:..	0/0:20:20,0:48:0,75,749:..	0/0:22:22,0:48:0,69,689:..	0/0:23:23,0:50:0,75,749:..	0/0:16:16,0:48:0,48,479:..	0/0:16:16,0:48:0,48,479:..	0/0:17:17,0:50:0,66,659:..	0/0:19:19,0:50:0,63,629:..	0/0:22:22,0:48:0,84,839:..	0/0:19:19,0:50:0,75,749:..	0/0:16:16,0:48:0,78,779:..	seq2
chr3	135762767	chr3_135762767_C_T	C	T	27	AF=0.013889;AQ=27	GT:DP:AD:GQ:PL:RNC	0/0:18:18,0:48:0,75,749:..	0/0:22:22,0:50:0,66,659:..	0/0:19:19,0:48:0,102,1019:..	0/0:25:25,0:50:0,75,749:..	0/1:36:25,11:28:27,0,48:..	0/0:21:21,0:50:0,66,659:..	0/0:21:21,0:50:0,75,749:..	0/0:20:20,0:50:0,78,779:..	0/0:18:18,0:48:0,54,539:..	0/0:22:22,0:48:0,102,1019:..	0/0:21:21,0:48:0,69,689:..	0/0:25:25,0:50:0,75,749:..	0/0:19:19,0:50:0,63,629:..	0/0:23:23,0:48:0,69,689:..	0/0:24:24,0:50:0,72,719:..	0/0:16:16,0:48:0,48,479:..	0/0:29:29,0:50:0,102,1019:..	0/0:19:19,0:50:0,75,749:..	0/0:22:22,0:48:0,72,719:..	0/0:22:22,0:50:0,72,719:..	0/0:18:18,0:50:0,60,599:..	0/0:25:25,0:50:0,75,749:..	0/0:24:24,0:48:0,54,779:..	0/0:24:24,0:50:0,96,959:..	0/0:20:20,0:50:0,66,659:..	0/0:18:18,0:50:0,69,689:..	0/0:22:22,0:50:0,66,659:..	0/0:22:22,0:48:0,69,689:..	0/0:23:23,0:50:0,69,689:..	0/0:21:21,0:50:0,66,899:..	0/0:22:22,0:50:0,75,749:..	0/0:21:21,0:48:0,66,659:..	0/0:22:22,0:48:0,66,659:..	0/0:18:18,0:48:0,54,539:..	0/0:26:26,0:50:0,81,809:..	0/0:15:15,0:45:0,45,449:..	seq2
chr3	146909426	chr3_146909426_G_T	G	T	38	AF=0.013889;AQ=38	GT:DP:AD:GQ:PL:RNC	0/0:22:22,0:50:0,75,749:..	0/0:25:25,0:50:0,75,749:..	0/0:21:21,0:50:0,66,659:..	0/0:18:18,0:48:0,90,899:..	0/0:16:16,0:48:0,66,659:..	0/0:17:17,0:50:0,93,929:..	0/0:23:23,0:48:0,69,689:..	0/0:24:24,0:50:0,75,749:..	0/0:22:22,0:50:0,72,719:..	0/0:22:22,0:48:0,69,689:..	0/0:20:20,0:50:0,75,749:..	0/0:20:20,0:50:0,120,1199:..	0/0:23:23,0:50:0,78,779:..	0/0:22:22,0:50:0,69,689:..	0/0:22:22,0:48:0,99,989:..	0/0:23:23,0:50:0,72,719:..	0/0:19:19,0:48:0,66,659:..	0/0:21:21,0:50:0,66,659:..	0/1:31:16,15:38:38,0,49:..	0/0:24:24,0:48:0,108,1079:..	0/0:21:21,0:50:0,63,629:..	0/0:23:23,0:48:0,123,1229:..	0/0:23:23,0:50:0,72,719:..	0/0:21:21,0:50:0,96,959:..	0/0:18:18,0:48:0,75,749:..	0/0:23:23,0:50:0,69,689:..	0/0:22:22,0:48:0,66,659:..	0/0:22:22,0:50:0,72,719:..	0/0:24:24,0:50:0,87,869:..	0/0:19:19,0:50:0,60,599:..	0/0:23:23,0:50:0,75,749:..	0/0:21:21,0:48:0,63,629:..	0/0:24:24,0:48:0,75,749:..	0/0:18:18,0:50:0,69,689:..	0/0:14:14,0:42:0,42,419:..	0/0:20:20,0:50:0,60,599:..	seq2
chr3	147749371	chr3_147749371_C_T	C	T	41	AF=0.013889;AQ=41	GT:DP:AD:GQ:PL:RNC	0/0:24:24,0:50:0,72,719:..	0/0:19:19,0:50:0,72,719:..	0/0:21:21,0:50:0,69,689:..	0/0:21:21,0:50:0,102,1019:..	0/0:24:24,0:48:0,72,719:..	0/0:18:18,0:50:0,63,629:..	0/0:18:18,0:48:0,72,719:..	0/0:20:20,0:50:0,63,629:..	0/0:16:16,0:48:0,63,629:..	0/0:27:27,0:50:0,108,1079:..	0/0:23:23,0:50:0,75,749:..	0/0:19:19,0:50:0,84,1079:..	0/0:16:16,0:48:0,78,779:..	0/0:22:22,0:48:0,72,719:..	0/0:22:22,0:50:0,90,899:..	0/0:16:16,0:48:0,48,479:..	0/0:18:18,0:48:0,99,989:..	0/0:24:24,0:48:0,75,749:..	0/0:18:18,0:50:0,60,599:..	0/0:12:12,0:36:0,39,389:..	0/0:17:17,0:48:0,51,509:..	0/0:21:21,0:50:0,108,1079:..	0/0:26:26,0:50:0,90,899:..	0/0:18:18,0:50:0,66,659:..	0/0:22:22,0:48:0,72,719:..	0/1:27:13,14:41:41,0,53:..	0/0:26:26,0:50:0,123,1229:..	0/0:21:21,0:48:0,93,929:..	0/0:16:16,0:48:0,57,569:..	0/0:16:16,0:48:0,48,479:..	0/0:20:20,0:48:0,75,749:..	0/0:23:23,0:50:0,72,719:..	0/0:15:15,0:45:0,45,449:..	0/0:19:19,0:50:0,75,749:..	0/0:20:20,0:48:0,66,659:..	0/0:21:21,0:50:0,87,869:..	seq2
chr3	153983629	chr3_153983629_C_A	C	A	20	AF=0.013889;AQ=20	GT:DP:AD:GQ:PL:RNC	0/0:10:10,0:30:0,30,299:..	0/0:18:18,0:50:0,54,539:..	0/0:11:11,0:33:0,33,329:..	0/0:11:11,0:33:0,33,329:..	0/0:16:16,0:48:0,48,479:..	0/0:19:19,0:50:0,57,569:..	0/0:13:13,0:39:0,39,389:..	0/0:10:10,0:3:0,0,239:..	0/0:12:12,0:36:0,39,389:..	0/0:13:13,0:9:0,9,329:..	0/0:12:12,0:36:0,36,359:..	0/0:17:17,0:21:0,21,449:..	0/0:9:9,0:27:0,30,299:..	0/0:7:7,0:21:0,21,209:..	0/0:17:17,0:50:0,54,539:..	0/0:9:9,0:27:0,27,269:..	0/0:16:16,0:48:0,48,479:..	0/0:9:9,0:27:0,30,299:..	0/0:11:11,0:33:0,33,329:..	0/0:8:8,0:24:0,24,239:..	0/0:9:9,0:27:0,30,299:..	0/0:20:20,0:3:0,0,479:..	0/0:12:12,0:36:0,36,359:..	0/0:14:14,0:42:0,42,419:..	0/0:16:16,0:48:0,48,479:..	0/0:17:17,0:50:0,54,539:..	0/0:9:9,0:27:0,27,269:..	0/0:10:10,0:3:0,0,239:..	0/0:9:9,0:1:2,0,212:II	0/0:10:10,0:30:0,30,299:..	0/0:12:12,0:36:0,36,359:..	0/0:6:6,0:18:0,18,179:..	0/0:13:13,0:39:0,39,389:..	0/0:17:17,0:50:0,51,509:..	0/0:9:9,0:27:0,27,269:..	0/1:15:11,4:20:20,0,45:..	seq2
chr4	4678560	chr4_4678560_G_A	G	A	43	AF=0.013889;AQ=43	GT:DP:AD:GQ:PL:RNC	0/0:20:20,0:48:0,87,869:..	0/0:22:22,0:48:0,84,839:..	0/0:17:17,0:50:0,102,1019:..	0/0:26:26,0:50:0,99,989:..	0/0:26:26,0:50:0,105,1049:..	0/0:20:20,0:50:0,63,629:..	0/1:17:6,11:43:43,0,56:..	0/0:23:23,0:48:0,72,719:..	0/0:22:22,0:48:0,75,749:..	0/0:17:17,0:50:0,57,569:..	0/0:16:16,0:48:0,57,569:..	0/0:19:19,0:50:0,57,569:..	0/0:23:23,0:50:0,90,899:..	0/0:25:25,0:50:0,75,749:..	0/0:21:21,0:48:0,66,659:..	0/0:21:21,0:50:0,72,719:..	0/0:20:20,0:48:0,66,659:..	0/0:19:19,0:50:0,60,599:..	0/0:25:25,0:50:0,75,749:..	0/0:18:18,0:50:0,60,599:..	0/0:20:20,0:48:0,75,749:..	0/0:25:25,0:50:0,99,989:..	0/0:21:21,0:48:0,69,689:..	0/0:23:23,0:50:0,69,689:..	0/0:20:20,0:50:0,66,659:..	0/0:24:24,0:48:0,99,989:..	0/0:23:23,0:50:0,75,749:..	0/0:23:23,0:39:0,39,629:..	0/0:19:19,0:50:0,57,569:..	0/0:17:17,0:50:0,54,539:..	0/0:24:24,0:48:0,90,899:..	0/0:20:20,0:48:0,75,749:..	0/0:21:21,0:50:0,72,719:..	0/0:23:23,0:50:0,69,689:..	0/0:19:19,0:50:0,84,839:..	0/0:27:27,0:50:0,51,749:..	seq2
chr4	7042005	chr4_7042005_C_A	C	A	45	AF=0.013889;AQ=45	GT:DP:AD:GQ:PL:RNC	0/0:24:24,0:50:0,84,839:..	0/0:19:19,0:50:0,96,959:..	0/0:22:22,0:50:0,87,869:..	0/0:26:26,0:50:0,78,779:..	0/0:23:23,0:50:0,96,959:..	0/0:24:24,0:48:0,102,1019:..	0/0:24:24,0:50:0,114,1139:..	0/0:17:17,0:50:0,54,539:..	0/0:23:23,0:50:0,75,749:..	0/0:25:25,0:50:0,81,809:..	0/0:18:18,0:48:0,54,539:..	0/0:27:27,0:50:0,87,869:..	0/0:27:27,0:48:0,90,899:..	0/0:18:18,0:48:0,117,1169:..	0/0:24:24,0:48:0,84,839:..	0/0:23:23,0:48:0,114,1139:..	0/0:22:22,0:50:0,72,719:..	0/0:17:17,0:50:0,96,959:..	0/0:23:23,0:50:0,102,1019:..	0/0:22:22,0:50:0,66,659:..	0/0:24:24,0:50:0,87,869:..	0/1:25:13,12:45:45,0,57:..	0/0:25:25,0:50:0,81,809:..	0/0:21:21,0:50:0,72,719:..	0/0:23:23,0:48:0,81,809:..	0/0:25:25,0:50:0,84,839:..	0/0:20:20,0:50:0,114,1139:..	0/0:24:24,0:50:0,93,929:..	0/0:22:22,0:50:0,69,689:..	0/0:21:21,0:50:0,90,899:..	0/0:24:24,0:48:0,99,989:..	0/0:21:21,0:50:0,66,659:..	0/0:22:22,0:48:0,108,1079:..	0/0:24:24,0:50:0,75,749:..	0/0:16:16,0:48:0,48,479:..	0/0:20:20,0:50:0,72,719:..	seq2
chr4	10170565	chr4_10170565_C_T	C	T	39	AF=0.013889;AQ=39	GT:DP:AD:GQ:PL:RNC	0/0:22:22,0:48:0,75,749:..	0/0:22:22,0:50:0,72,719:..	0/0:24:24,0:48:0,72,719:..	0/0:24:24,0:50:0,75,749:..	0/0:23:23,0:48:0,69,689:..	0/0:25:25,0:50:0,114,1139:..	0/0:23:23,0:48:0,90,899:..	0/0:16:16,0:48:0,51,509:..	0/0:16:16,0:48:0,66,659:..	0/0:23:23,0:48:0,69,689:..	0/0:23:23,0:48:0,72,719:..	0/0:22:22,0:48:0,75,749:..	0/0:21:21,0:50:0,75,749:..	0/0:22:22,0:48:0,75,749:..	0/0:27:27,0:50:0,93,929:..	0/0:25:25,0:50:0,78,779:..	0/0:18:18,0:50:0,75,749:..	0/0:16:16,0:48:0,48,479:..	0/0:19:19,0:50:0,66,659:..	0/0:24:24,0:48:0,78,779:..	0/0:24:24,0:42:0,42,659:..	0/0:25:25,0:50:0,93,929:..	0/0:23:23,0:50:0,75,749:..	0/0:24:24,0:48:0,75,749:..	0/0:19:19,0:48:0,78,779:..	0/0:27:27,0:50:0,93,929:..	0/0:26:26,0:50:0,90,899:..	0/1:34:20,14:39:39,0,54:..	0/0:24:24,0:48:0,72,719:..	0/0:25:25,0:48:0,78,779:..	0/0:23:23,0:48:0,72,719:..	0/0:21:21,0:48:0,75,749:..	0/0:19:19,0:48:0,72,719:..	0/0:23:23,0:50:0,72,719:..	0/0:22:22,0:48:0,75,749:..	0/0:24:24,0:50:0,78,779:..	seq2
chr4	25128557	chr4_25128557_G_A	G	A	39	AF=0.013889;AQ=39	GT:DP:AD:GQ:PL:RNC	0/0:21:21,0:48:0,72,719:..	0/0:19:19,0:50:0,75,749:..	0/0:21:21,0:50:0,66,659:..	0/0:17:17,0:50:0,72,719:..	0/0:22:22,0:50:0,66,659:..	0/0:28:28,0:50:0,105,1049:..	0/0:20:20,0:50:0,72,719:..	0/0:24:24,0:50:0,87,869:..	0/0:17:17,0:50:0,51,509:..	0/0:25:25,0:48:0,75,749:..	0/0:23:23,0:48:0,75,749:..	0/0:25:25,0:50:0,69,929:..	0/0:25:25,0:50:0,102,1019:..	0/0:23:23,0:50:0,66,899:..	0/0:23:23,0:50:0,75,749:..	0/0:19:19,0:50:0,60,599:..	0/0:20:20,0:48:0,78,779:..	0/0:23:23,0:50:0,75,749:..	0/0:20:20,0:48:0,69,689:..	0/0:17:17,0:48:0,96,959:..	0/0:22:22,0:50:0,75,749:..	0/1:33:18,15:39:39,0,53:..	0/0:23:23,0:50:0,75,749:..	0/0:17:17,0:50:0,72,719:..	0/0:22:22,0:48:0,72,719:..	0/0:22:22,0:50:0,75,749:..	0/0:23:23,0:50:0,75,749:..	0/0:24:24,0:48:0,72,719:..	0/0:23:23,0:48:0,111,1109:..	0/0:24:24,0:48:0,96,959:..	0/0:19:19,0:48:0,69,689:..	0/0:18:18,0:48:0,75,749:..	0/0:20:20,0:48:0,69,689:..	0/0:21:21,0:48:0,69,689:..	0/0:20:20,0:48:0,102,1019:..	0/0:22:22,0:50:0,75,749:..	seq2
chr4	27300233	chr4_27300233_A_T	A	T	38	AF=0.013889;AQ=38	GT:DP:AD:GQ:PL:RNC	0/0:16:16,0:48:0,48,479:..	0/0:22:22,0:48:0,99,989:..	0/0:24:24,0:48:0,78,779:..	0/0:19:19,0:48:0,60,599:..	0/0:21:21,0:48:0,66,659:..	0/0:24:24,0:50:0,75,749:..	0/0:21:21,0:50:0,75,749:..	0/0:24:24,0:48:0,72,719:..	0/0:21:21,0:48:0,63,629:..	0/0:25:25,0:50:0,102,1019:..	0/0:16:16,0:48:0,63,629:..	0/1:29:17,12:38:38,0,55:..	0/0:21:21,0:50:0,69,689:..	0/0:23:23,0:48:0,72,719:..	0/0:21:21,0:50:0,75,749:..	0/0:14:14,0:42:0,42,419:..	0/0:17:17,0:50:0,75,749:..	0/0:25:25,0:50:0,78,779:..	0/0:18:18,0:50:0,54,539:..	0/0:19:19,0:50:0,75,749:..	0/0:17:17,0:50:0,57,569:..	0/0:28:28,0:50:0,108,1079:..	0/0:17:17,0:48:0,87,869:..	0/0:25:25,0:50:0,75,749:..	0/0:23:23,0:48:0,75,749:..	0/0:25:25,0:50:0,75,749:..	0/0:23:23,0:48:0,69,689:..	0/0:20:20,0:48:0,69,689:..	0/0:18:18,0:50:0,54,539:..	0/0:24:24,0:48:0,72,719:..	0/0:26:26,0:50:0,90,899:..	0/0:20:20,0:50:0,60,599:..	0/0:20:20,0:48:0,96,959:..	0/0:25:25,0:48:0,75,749:..	0/0:19:19,0:50:0,57,569:..	0/0:16:16,0:48:0,51,509:..	seq2
chr4	28262451	chr4_28262451_C_T	C	T	43	AF=0.013889;AQ=43	GT:DP:AD:GQ:PL:RNC	0/0:16:16,0:48:0,69,689:..	0/0:20:20,0:50:0,69,689:..	0/0:22:22,0:50:0,66,659:..	0/0:22:22,0:50:0,99,989:..	0/0:23:23,0:50:0,75,749:..	0/1:22:11,11:43:43,0,53:..	0/0:20:20,0:50:0,60,599:..	0/0:20:20,0:50:0,63,629:..	0/0:18:18,0:50:0,66,659:..	0/0:24:24,0:50:0,75,749:..	0/0:24:24,0:48:0,72,719:..	0/0:25:25,0:48:0,105,1049:..	0/0:19:19,0:50:0,72,719:..	0/0:22:22,0:50:0,78,779:..	0/0:23:23,0:50:0,93,929:..	0/0:16:16,0:48:0,48,479:..	0/0:16:16,0:48:0,60,599:..	0/0:16:16,0:48:0,48,479:..	0/0:23:23,0:48:0,69,689:..	0/0:19:19,0:48:0,87,869:..	0/0:22:22,0:50:0,69,689:..	0/0:25:25,0:48:0,96,959:..	0/0:18:18,0:50:0,69,689:..	0/0:25:25,0:50:0,78,779:..	0/0:16:16,0:48:0,51,509:..	0/0:21:21,0:48:0,69,689:..	0/0:20:20,0:50:0,72,719:..	0/0:15:15,0:45:0,45,449:..	0/0:18:18,0:50:0,60,599:..	0/0:22:22,0:50:0,75,749:..	0/0:20:20,0:48:0,63,629:..	0/0:23:23,0:48:0,72,719:..	0/0:22:22,0:50:0,72,719:..	0/0:20:20,0:50:0,69,689:..	0/0:21:21,0:48:0,78,779:..	0/0:21:21,0:50:0,63,629:..	seq2
chr4	35411739	chr4_35411739_A_T	A	T	12	AF=0.027778;AQ=12	GT:DP:AD:GQ:PL:RNC	0/0:20:20,0:50:0,63,629:..	0/0:14:14,0:42:0,42,419:..	0/0:30:30,0:50:0,90,899:..	0/0:25:25,0:48:0,87,869:..	0/0:28:28,0:50:0,93,929:..	0/0:26:22,0:17:0,0,0:II	0/0:16:16,0:48:0,48,479:..	0/0:15:15,0:45:0,45,449:..	0/0:17:17,0:50:0,60,599:..	0/0:19:19,0:27:0,27,509:..	0/0:22:22,0:50:0,75,749:..	./1:22:.,10:.:0,0,0:O.	0/1:24:21,3:10:9,0,28:..	0/0:24:24,0:50:0,72,719:..	0/0:25:25,0:45:0,45,689:..	0/0:17:17,0:50:0,57,569:..	0/0:30:30,0:50:0,96,959:..	0/0:22:22,0:50:0,66,659:..	0/0:15:15,0:15:0,15,389:..	0/0:20:20,0:30:0,30,539:..	0/0:14:14,0:42:0,45,449:..	0/0:17:17,0:50:0,54,539:..	0/0:20:20,0:50:0,60,599:..	0/0:25:25,0:48:0,75,749:..	0/0:21:21,0:33:0,33,569:..	0/0:24:24,0:50:0,81,809:..	0/0:30:30,0:50:0,108,1079:..	0/0:14:14,0:42:0,42,419:..	0/0:29:29,0:50:0,90,899:..	0/0:26:26,0:48:0,78,779:..	0/0:26:26,0:50:0,81,809:..	0/0:17:17,0:21:0,21,449:..	0/0:18:18,0:50:0,54,539:..	0/0:20:20,0:50:0,60,599:..	0/0:14:14,0:12:0,12,359:..	0/0:24:24,0:48:0,72,719:..	seq2
chr4	44129539	chr4_44129539_T_C	T	C	48	AF=0.013889;AQ=48	GT:DP:AD:GQ:PL:RNC	0/0:16:16,0:48:0,87,869:..	0/0:22:22,0:50:0,108,1079:..	0/0:16:16,0:48:0,66,659:..	0/0:24:24,0:50:0,99,989:..	0/0:20:20,0:48:0,60,599:..	0/0:19:19,0:50:0,69,689:..	0/0:24:24,0:50:0,72,719:..	0/0:21:21,0:50:0,69,689:..	0/0:20:20,0:50:0,63,629:..	0/0:26:26,0:50:0,99,989:..	0/0:20:20,0:48:0,69,689:..	0/1:33:8,25:40:48,0,40:..	0/0:25:25,0:50:0,78,779:..	0/0:21:21,0:48:0,66,899:..	0/0:22:22,0:48:0,75,749:..	0/0:22:22,0:50:0,78,779:..	0/0:22:22,0:50:0,69,689:..	0/0:22:22,0:50:0,105,1049:..	0/0:21:21,0:50:0,108,1079:..	0/0:19:19,0:50:0,66,659:..	0/0:15:15,0:45:0,45,449:..	0/0:27:27,0:50:0,105,1049:..	0/0:16:16,0:48:0,69,689:..	0/0:21:21,0:48:0,123,1229:..	0/0:21:21,0:50:0,66,659:..	0/0:20:20,0:50:0,60,599:..	0/0:25:25,0:50:0,99,989:..	0/0:24:24,0:48:0,72,719:..	0/0:17:17,0:48:0,63,629:..	0/0:19:19,0:48:0,99,989:..	0/0:18:18,0:50:0,66,659:..	0/0:16:16,0:48:0,48,479:..	0/0:25:25,0:50:0,75,749:..	0/0:20:20,0:50:0,75,749:..	0/0:17:17,0:50:0,63,629:..	0/0:20:20,0:48:0,63,629:..	seq2
chr4	45528567	chr4_45528567_G_A	G	A	50	AF=0.013889;AQ=50	GT:DP:AD:GQ:PL:RNC	0/0:23:23,0:50:0,99,989:..	0/0:14:14,0:42:0,42,419:..	0/0:23:23,0:50:0,75,749:..	0/0:25:25,0:48:0,120,1199:..	0/0:22:22,0:50:0,93,929:..	0/0:25:25,0:48:0,78,779:..	0/0:24:24,0:48:0,78,779:..	0/0:23:23,0:50:0,75,749:..	0/0:19:19,0:48:0,57,569:..	0/0:26:26,0:48:0,93,929:..	0/0:20:20,0:50:0,69,689:..	0/0:26:26,0:48:0,114,1139:..	0/0:19:19,0:50:0,105,1049:..	0/0:23:23,0:50:0,75,749:..	0/0:24:24,0:48:0,72,719:..	0/0:25:25,0:48:0,75,749:..	0/0:26:26,0:50:0,96,959:..	0/0:19:19,0:50:0,72,719:..	0/1:23:8,15:47:50,0,50:..	0/0:20:20,0:48:0,102,1019:..	0/0:24:24,0:50:0,99,989:..	0/0:14:14,0:42:0,45,449:..	0/0:24:24,0:50:0,75,749:..	0/0:24:24,0:50:0,75,749:..	0/0:19:19,0:50:0,69,689:..	0/0:17:17,0:50:0,90,899:..	0/0:22:22,0:50:0,72,719:..	0/0:18:18,0:50:0,60,599:..	0/0:30:30,0:50:0,105,1049:..	0/0:16:16,0:48:0,48,479:..	0/0:23:23,0:50:0,78,779:..	0/0:18:18,0:50:0,66,659:..	0/0:24:24,0:50:0,96,959:..	0/0:16:16,0:48:0,48,479:..	0/0:20:20,0:48:0,72,719:..	0/0:23:23,0:50:0,78,779:..	seq2
chr4	45750118	chr4_45750118_G_A	G	A	43	AF=0.013889;AQ=43	GT:DP:AD:GQ:PL:RNC	0/0:12:12,0:36:0,39,389:..	0/0:21:21,0:48:0,72,719:..	0/0:19:19,0:50:0,102,1019:..	0/0:26:26,0:50:0,135,1349:..	0/0:24:24,0:50:0,72,719:..	0/0:21:21,0:50:0,102,1019:..	0/0:16:16,0:48:0,63,629:..	0/1:31:16,15:42:43,0,48:..	0/0:19:19,0:50:0,75,749:..	0/0:25:25,0:50:0,120,1199:..	0/0:26:26,0:50:0,93,929:..	0/0:24:24,0:50:0,123,1229:..	0/0:23:23,0:50:0,84,839:..	0/0:21:21,0:50:0,105,1049:..	0/0:25:25,0:48:0,78,779:..	0/0:27:27,0:50:0,105,1049:..	0/0:27:27,0:50:0,120,1199:..	0/0:20:20,0:48:0,69,689:..	0/0:23:23,0:50:0,75,749:..	0/0:25:25,0:50:0,123,1229:..	0/0:18:18,0:50:0,81,809:..	0/0:30:30,0:50:0,114,1139:..	0/0:25:25,0:50:0,78,779:..	0/0:21:21,0:50:0,63,629:..	0/0:23:23,0:48:0,87,869:..	0/0:29:29,0:50:0,93,929:..	0/0:19:19,0:50:0,105,1049:..	0/0:22:22,0:50:0,81,809:..	0/0:23:23,0:48:0,96,959:..	0/0:23:23,0:50:0,72,719:..	0/0:23:23,0:50:0,84,839:..	0/0:18:18,0:50:0,84,839:..	0/0:24:24,0:50:0,72,719:..	0/0:18:18,0:50:0,72,719:..	0/0:20:20,0:48:0,60,599:..	0/0:20:20,0:50:0,75,749:..	seq2
chr4	46430064	chr4_46430064_T_A	T	A	41	AF=0.013889;AQ=41	GT:DP:AD:GQ:PL:RNC	0/0:24:24,0:50:0,90,899:..	0/0:21:21,0:48:0,99,989:..	0/0:23:23,0:48:0,93,929:..	0/0:22:22,0:36:0,36,599:..	0/0:24:24,0:48:0,108,1079:..	0/0:30:30,0:50:0,99,989:..	0/0:18:18,0:50:0,63,629:..	0/0:24:24,0:48:0,75,749:..	0/0:25:25,0:48:0,87,869:..	0/0:22:22,0:48:0,108,1079:..	0/0:25:25,0:48:0,102,1019:..	0/0:29:29,0:50:0,87,869:..	0/0:19:19,0:27:0,27,509:..	0/0:26:26,0:50:0,87,869:..	0/0:27:27,0:50:0,90,1139:..	0/1:27:12,15:41:41,0,54:..	0/0:24:24,0:50:0,99,989:..	0/0:27:27,0:50:0,90,899:..	0/0:31:31,0:50:0,108,1079:..	0/0:24:24,0:50:0,84,839:..	0/0:27:27,0:50:0,93,929:..	0/0:26:26,0:48:0,156,1559:..	0/0:21:21,0:50:0,96,959:..	0/0:27:27,0:50:0,132,1319:..	0/0:23:23,0:50:0,99,989:..	0/0:24:24,0:50:0,78,779:..	0/0:27:27,0:50:0,117,1169:..	0/0:22:22,0:48:0,75,749:..	0/0:16:16,0:48:0,75,749:..	0/0:16:16,0:48:0,69,689:..	0/0:24:24,0:48:0,96,959:..	0/0:22:22,0:50:0,105,1049:..	0/0:23:23,0:48:0,84,839:..	0/0:20:20,0:50:0,126,1259:..	0/0:25:25,0:50:0,75,749:..	0/0:24:24,0:50:0,81,1049:..	seq2
chr4	46768989	chr4_46768989_C_T	C	T	42	AF=0.013889;AQ=42	GT:DP:AD:GQ:PL:RNC	0/0:22:22,0:50:0,66,659:..	0/0:22:22,0:50:0,66,659:..	0/0:32:32,0:50:0,99,989:..	0/0:22:22,0:50:0,66,659:..	0/0:23:23,0:50:0,69,689:..	0/0:25:25,0:48:0,48,719:..	0/0:19:19,0:50:0,72,719:..	0/0:24:24,0:50:0,72,719:..	0/0:16:16,0:48:0,48,479:..	0/0:29:29,0:50:0,87,869:..	0/0:16:16,0:48:0,48,479:..	0/0:25:25,0:50:0,75,749:..	0/0:31:31,0:50:0,93,929:..	0/0:24:24,0:50:0,72,719:..	0/0:22:22,0:50:0,66,659:..	0/0:23:23,0:50:0,69,689:..	0/0:27:27,0:50:0,90,899:..	0/0:21:21,0:50:0,63,629:..	0/0:23:23,0:50:0,72,719:..	0/0:28:28,0:50:0,90,899:..	0/0:23:23,0:50:0,72,719:..	0/0:27:27,0:50:0,81,809:..	0/0:24:24,0:50:0,75,749:..	0/0:25:25,0:50:0,75,749:..	0/0:24:24,0:50:0,72,719:..	0/1:32:13,19:42:42,0,51:..	0/0:17:17,0:50:0,51,509:..	0/0:16:16,0:48:0,48,479:..	0/0:19:19,0:50:0,57,569:..	0/0:16:16,0:48:0,60,599:..	0/0:19:19,0:50:0,57,569:..	0/0:24:24,0:50:0,72,719:..	0/0:24:24,0:50:0,72,719:..	0/0:23:23,0:48:0,69,689:..	0/0:23:23,0:50:0,69,689:..	0/0:24:24,0:50:0,75,749:..	seq2
chr4	51148227	chr4_51148227_C_T	C	T	27	AF=0.013889;AQ=27	GT:DP:AD:GQ:PL:RNC	0/0:17:17,0:50:0,54,539:..	0/0:16:16,0:48:0,102,1019:..	0/0:18:18,0:50:0,54,539:..	0/0:19:19,0:50:0,90,899:..	0/0:23:23,0:48:0,78,779:..	0/0:26:26,0:50:0,78,779:..	0/0:23:23,0:50:0,75,749:..	0/0:24:24,0:50:0,72,719:..	0/0:21:21,0:50:0,63,629:..	0/0:23:23,0:50:0,72,719:..	0/0:22:22,0:50:0,72,719:..	0/0:24:24,0:50:0,147,1469:..	0/0:21:21,0:48:0,63,629:..	0/0:18:18,0:50:0,135,1349:..	0/0:29:29,0:48:0,93,929:..	0/1:36:25,11:28:27,0,49:..	0/0:19:19,0:48:0,60,599:..	0/0:16:16,0:48:0,75,749:..	0/0:23:23,0:48:0,81,809:..	0/0:29:29,0:50:0,105,1049:..	0/0:16:16,0:48:0,57,569:..	0/0:24:24,0:50:0,87,869:..	0/0:17:17,0:50:0,57,569:..	0/0:23:23,0:50:0,108,1079:..	0/0:21:21,0:48:0,72,719:..	0/0:21:21,0:50:0,69,689:..	0/0:27:27,0:50:0,99,989:..	0/0:17:17,0:50:0,72,719:..	0/0:19:19,0:48:0,63,629:..	0/0:25:25,0:50:0,93,929:..	0/0:27:27,0:50:0,126,1259:..	0/0:21:21,0:50:0,69,689:..	0/0:23:23,0:50:0,78,779:..	0/0:21:21,0:50:0,66,659:..	0/0:17:17,0:50:0,54,539:..	0/0:24:24,0:48:0,72,719:..	seq2
chr4	77841176	chr4_77841176_C_T	C	T	42	AF=0.013889;AQ=42	GT:DP:AD:GQ:PL:RNC	0/0:23:23,0:50:0,72,719:..	0/0:18:18,0:50:0,57,569:..	0/0:23:23,0:48:0,87,869:..	0/0:24:24,0:48:0,81,809:..	0/0:23:23,0:50:0,69,689:..	0/0:20:20,0:48:0,81,809:..	0/0:20:20,0:48:0,66,659:..	0/0:18:18,0:48:0,69,689:..	0/0:24:24,0:48:0,81,809:..	0/0:20:20,0:50:0,69,689:..	0/0:25:25,0:50:0,81,809:..	0/0:21:21,0:50:0,66,659:..	0/0:17:17,0:48:0,54,539:..	0/0:17:17,0:50:0,57,569:..	0/0:21:21,0:48:0,75,749:..	0/0:16:16,0:48:0,48,479:..	0/0:16:16,0:48:0,51,509:..	0/0:18:18,0:50:0,54,539:..	0/0:23:23,0:48:0,78,779:..	0/0:16:16,0:48:0,66,659:..	0/0:22:22,0:50:0,87,869:..	0/0:24:24,0:48:0,75,749:..	0/0:24:24,0:50:0,72,719:..	0/0:24:24,0:48:0,78,779:..	0/0:27:27,0:50:0,84,839:..	0/0:15:15,0:45:0,45,449:..	0/0:21:21,0:50:0,72,719:..	0/1:30:15,15:42:42,0,54:..	0/0:19:19,0:50:0,81,809:..	0/0:18:18,0:50:0,72,719:..	0/0:22:22,0:50:0,69,689:..	0/0:24:24,0:42:0,42,659:..	0/0:17:17,0:50:0,54,539:..	0/0:18:18,0:50:0,63,629:..	0/0:16:16,0:48:0,48,479:..	0/0:18:18,0:48:0,54,539:..	seq2
chr4	79457808	chr4_79457808_C_A	C	A	36	AF=0.013889;AQ=36	GT:DP:AD:GQ:PL:RNC	0/0:21:21,0:48:0,69,689:..	0/0:16:16,0:48:0,48,479:..	0/0:16:16,0:48:0,63,629:..	0/0:22:22,0:48:0,78,779:..	0/0:20:20,0:50:0,75,749:..	0/0:22:22,0:50:0,99,989:..	0/0:24:24,0:50:0,102,1019:..	0/0:23:23,0:50:0,84,839:..	0/0:18:18,0:50:0,69,689:..	0/0:22:22,0:50:0,69,689:..	0/0:22:22,0:48:0,78,779:..	0/0:22:22,0:48:0,72,719:..	0/0:22:22,0:50:0,102,1019:..	0/0:23:23,0:50:0,75,749:..	0/0:21:21,0:50:0,129,1289:..	0/0:20:20,0:48:0,69,689:..	0/0:23:23,0:48:0,81,809:..	0/0:19:19,0:50:0,87,869:..	0/1:32:18,14:36:36,0,50:..	0/0:21:21,0:50:0,66,659:..	0/0:23:23,0:50:0,69,689:..	0/0:23:23,0:50:0,132,1319:..	0/0:19:19,0:48:0,66,659:..	0/0:21:21,0:50:0,69,689:..	0/0:22:22,0:50:0,69,689:..	0/0:23:23,0:48:0,111,1109:..	0/0:21:21,0:48:0,93,929:..	0/0:16:16,0:48:0,54,779:..	0/0:21:21,0:50:0,102,1019:..	0/0:19:19,0:50:0,57,569:..	0/0:19:19,0:48:0,75,749:..	0/0:22:22,0:50:0,75,749:..	0/0:23:23,0:50:0,96,959:..	0/0:19:19,0:48:0,57,569:..	0/0:15:15,0:45:0,45,449:..	0/0:22:22,0:48:0,75,749:..	seq2
chr4	81059558	chr4_81059558_A_T	A	T	40	AF=0.013889;AQ=40	GT:DP:AD:GQ:PL:RNC	0/0:19:19,0:50:0,63,629:..	0/0:17:17,0:50:0,51,509:..	0/0:24:24,0:48:0,87,869:..	0/0:18:18,0:50:0,66,659:..	0/0:17:17,0:50:0,54,539:..	0/0:31:31,0:50:0,99,989:..	0/0:19:19,0:50:0,63,629:..	0/0:19:19,0:48:0,105,1049:..	0/0:17:17,0:50:0,75,749:..	0/0:25:25,0:48:0,48,719:..	0/0:22:22,0:50:0,72,719:..	0/0:26:26,0:50:0,87,869:..	0/0:25:25,0:50:0,78,779:..	0/0:17:17,0:50:0,57,569:..	0/0:21:21,0:50:0,72,719:..	0/0:22:22,0:48:0,69,689:..	0/1:30:14,16:40:40,0,54:..	0/0:21:21,0:50:0,69,689:..	0/0:15:15,0:45:0,45,449:..	0/0:24:24,0:50:0,72,719:..	0/0:23:23,0:39:0,39,629:..	0/0:21:21,0:48:0,93,929:..	0/0:19:19,0:50:0,57,569:..	0/0:23:23,0:50:0,105,1049:..	0/0:27:27,0:50:0,96,959:..	0/0:23:23,0:50:0,99,989:..	0/0:16:16,0:48:0,99,989:..	0/0:22:22,0:50:0,78,779:..	0/0:29:29,0:50:0,93,929:..	0/0:16:16,0:48:0,72,719:..	0/0:22:22,0:50:0,75,749:..	0/0:22:22,0:48:0,69,689:..	0/0:24:24,0:48:0,54,779:..	0/0:22:22,0:50:0,66,659:..	0/0:18:18,0:50:0,63,629:..	0/0:26:26,0:50:0,90,899:..	seq2
chr4	81653965	chr4_81653965_T_C	T	C	32	AF=0.013889;AQ=32	GT:DP:AD:GQ:PL:RNC	0/0:20:20,0:50:0,63,629:..	0/0:20:20,0:50:0,75,749:..	0/0:16:16,0:48:0,48,479:..	0/0:22:22,0:50:0,66,659:..	0/0:19:19,0:48:0,60,599:..	0/0:25:25,0:48:0,75,749:..	0/0:22:22,0:50:0,84,839:..	0/0:19:19,0:50:0,72,719:..	0/0:22:22,0:48:0,75,749:..	0/0:23:23,0:48:0,81,809:..	0/0:22:22,0:50:0,72,719:..	0/0:30:30,0:50:0,93,929:..	0/0:25:25,0:50:0,75,749:..	0/0:19:19,0:50:0,69,689:..	0/0:23:23,0:50:0,72,719:..	0/0:19:19,0:50:0,75,749:..	0/0:23:23,0:50:0,60,839:..	0/0:17:17,0:48:0,72,719:..	0/1:19:11,8:32:32,0,51:..	0/0:17:17,0:50:0,66,659:..	0/0:26:26,0:50:0,102,1019:..	0/0:24:24,0:48:0,90,899:..	0/0:21:21,0:48:0,99,989:..	0/0:21:21,0:50:0,66,659:..	0/0:24:24,0:50:0,96,959:..	0/0:24:24,0:42:0,42,659:..	0/0:26:26,0:48:0,87,869:..	0/0:25:25,0:48:0,84,839:..	0/0:16:16,0:48:0,48,479:..	0/0:21:21,0:48:0,63,629:..	0/0:21:21,0:50:0,72,719:..	0/0:21:21,0:33:0,33,569:..	0/0:28:28,0:50:0,96,959:..	0/0:30:30,0:50:0,102,1019:..	0/0:21:21,0:50:0,72,719:..	0/0:24:24,0:50:0,75,749:..	seq2
chr4	83780146	chr4_83780146_A_G	A	G	41	AF=0.013889;AQ=41	GT:DP:AD:GQ:PL:RNC	0/0:17:17,0:50:0,54,539:..	0/0:23:23,0:50:0,72,719:..	0/0:22:22,0:48:0,75,749:..	0/0:25:25,0:50:0,75,749:..	0/0:20:20,0:50:0,69,689:..	0/1:35:20,15:42:41,0,54:..	0/0:23:23,0:50:0,93,929:..	0/0:20:20,0:50:0,75,749:..	0/0:22:22,0:50:0,66,659:..	0/0:24:24,0:48:0,90,899:..	0/0:25:25,0:50:0,84,839:..	0/0:24:24,0:48:0,108,1079:..	0/0:22:22,0:50:0,75,749:..	0/0:22:22,0:50:0,93,929:..	0/0:20:20,0:48:0,63,629:..	0/0:21:21,0:50:0,69,689:..	0/0:16:16,0:48:0,102,1019:..	0/0:26:26,0:50:0,93,929:..	0/0:16:16,0:48:0,48,479:..	0/0:19:19,0:48:0,114,1139:..	0/0:23:23,0:50:0,72,719:..	0/0:28:28,0:50:0,123,1229:..	0/0:19:19,0:50:0,69,689:..	0/0:22:22,0:48:0,72,719:..	0/0:23:23,0:50:0,72,719:..	0/0:23:23,0:50:0,72,719:..	0/0:20:20,0:48:0,138,1379:..	0/0:18:18,0:48:0,96,959:..	0/0:20:20,0:48:0,60,599:..	0/0:25:25,0:48:0,102,1019:..	0/0:25:25,0:50:0,69,929:..	0/0:17:17,0:48:0,51,509:..	0/0:22:22,0:48:0,84,839:..	0/0:17:17,0:48:0,51,509:..	0/0:20:20,0:48:0,75,749:..	0/0:20:20,0:50:0,102,1019:..	seq2
chr4	88411294	chr4_88411294_G_T	G	T	23	AF=0.013889;AQ=23	GT:DP:AD:GQ:PL:RNC	0/0:21:21,0:48:0,63,629:..	0/0:21:21,0:50:0,63,629:..	0/0:14:14,0:42:0,45,449:..	0/0:21:21,0:50:0,99,989:..	0/0:24:24,0:48:0,72,719:..	0/0:16:16,0:48:0,75,749:..	0/0:16:16,0:48:0,48,479:..	0/0:19:19,0:48:0,60,599:..	0/1:22:16,6:24:23,0,46:..	0/0:16:16,0:48:0,54,539:..	0/0:20:20,0:50:0,99,989:..	0/0:16:16,0:48:0,66,659:..	0/0:17:17,0:50:0,60,599:..	0/0:21:21,0:50:0,75,749:..	0/0:21:21,0:50:0,72,719:..	0/0:18:18,0:48:0,84,839:..	0/0:19:19,0:48:0,78,779:..	0/0:18:18,0:50:0,60,599:..	0/0:20:20,0:50:0,69,689:..	0/0:20:20,0:50:0,75,749:..	0/0:21:21,0:50:0,75,749:..	0/0:23:23,0:50:0,87,869:..	0/0:20:20,0:48:0,60,599:..	0/0:16:16,0:48:0,51,509:..	0/0:16:16,0:48:0,69,689:..	0/0:19:19,0:50:0,72,719:..	0/0:24:24,0:48:0,93,929:..	0/0:16:16,0:48:0,48,479:..	0/0:19:19,0:50:0,84,839:..	0/0:20:20,0:50:0,75,749:..	0/0:20:20,0:48:0,108,1079:..	0/0:19:19,0:50:0,87,869:..	0/0:23:23,0:50:0,69,689:..	0/0:21:21,0:50:0,69,689:..	0/0:19:19,0:50:0,66,659:..	0/0:16:16,0:48:0,48,479:..	seq2
chr4	88564435	chr4_88564435_A_T	A	T	12	AF=0.013889;AQ=12	GT:DP:AD:GQ:PL:RNC	0/0:18:18,0:50:0,57,569:..	0/0:16:16,0:48:0,51,509:..	0/0:19:19,0:27:0,27,509:..	0/0:19:19,0:50:0,60,599:..	0/0:21:21,0:50:0,66,659:..	0/0:15:15,0:15:0,15,389:..	0/0:25:25,0:50:0,75,749:..	0/0:18:18,0:50:0,57,569:..	0/0:12:12,0:7:0,6,299:..	0/0:23:23,0:39:0,39,629:..	0/0:16:16,0:18:0,18,419:..	0/0:23:23,0:50:0,69,689:..	0/0:25:22,3:16:0,16,37:II	0/0:17:14,0:17:0,0,0:II	0/0:24:24,0:50:0,72,719:..	0/0:20:20,0:30:0,30,539:..	0/0:17:17,0:50:0,54,539:..	0/0:14:14,0:12:0,12,359:..	0/0:15:15,0:45:0,45,449:..	0/0:27:27,0:50:0,81,1049:..	0/1:15:11,4:13:12,0,30:..	0/0:28:28,0:24:0,24,719:..	0/0:19:19,0:50:0,60,599:..	0/0:19:19,0:27:0,27,509:..	0/0:18:18,0:50:0,54,539:..	0/0:24:24,0:42:0,42,659:..	0/0:18:18,0:50:0,57,569:..	0/0:21:21,0:33:0,33,569:..	0/0:22:22,0:36:0,36,599:..	0/0:14:14,0:42:0,42,419:..	0/0:16:16,0:18:0,18,419:..	0/0:16:16,0:48:0,54,539:..	0/0:24:24,0:12:0,12,599:..	0/0:16:16,0:48:0,48,479:..	0/0:19:19,0:50:0,63,629:..	0/0:19:19,0:50:0,63,629:..	seq2
chr4	91086880	chr4_91086880_A_C	A	C	48	AF=0.013889;AQ=48	GT:DP:AD:GQ:PL:RNC	0/0:22:22,0:48:0,69,689:..	0/0:19:19,0:48:0,72,719:..	0/0:22:22,0:48:0,75,749:..	0/0:24:24,0:48:0,72,719:..	0/0:28:28,0:50:0,96,959:..	0/0:23:23,0:48:0,78,779:..	0/0:19:19,0:50:0,66,659:..	0/0:17:17,0:50:0,63,629:..	0/0:16:16,0:48:0,48,479:..	0/0:23:23,0:50:0,75,749:..	0/1:28:12,16:46:48,0,50:..	0/0:24:24,0:50:0,72,719:..	0/0:23:23,0:50:0,69,689:..	0/0:22:22,0:48:0,93,929:..	0/0:19:19,0:50:0,60,599:..	0/0:22:22,0:50:0,69,689:..	0/0:22:22,0:48:0,75,749:..	0/0:20:20,0:50:0,69,689:..	0/0:23:23,0:48:0,75,749:..	0/0:20:20,0:48:0,75,749:..	0/0:24:24,0:50:0,75,749:..	0/0:25:25,0:50:0,114,1139:..	0/0:25:25,0:50:0,75,749:..	0/0:18:18,0:48:0,63,629:..	0/0:21:21,0:48:0,69,689:..	0/0:27:27,0:50:0,96,959:..	0/0:23:23,0:48:0,87,869:..	0/0:18:18,0:50:0,60,599:..	0/0:20:20,0:50:0,75,749:..	0/0:20:20,0:48:0,75,749:..	0/0:24:24,0:48:0,75,749:..	0/0:17:17,0:50:0,75,749:..	0/0:21:21,0:50:0,63,629:..	0/0:26:26,0:50:0,93,929:..	0/0:16:16,0:48:0,48,479:..	0/0:22:22,0:48:0,75,749:..	seq2
chr4	98958794	chr4_98958794_G_A	G	A	38	AF=0.013889;AQ=38	GT:DP:AD:GQ:PL:RNC	0/0:16:16,0:48:0,60,599:..	0/0:23:23,0:48:0,69,689:..	0/0:24:24,0:50:0,75,749:..	0/0:20:20,0:50:0,72,719:..	0/0:20:20,0:48:0,90,899:..	0/0:22:22,0:50:0,66,659:..	0/0:22:22,0:50:0,75,749:..	0/0:20:20,0:48:0,90,899:..	0/0:20:20,0:50:0,69,689:..	0/0:20:20,0:48:0,75,749:..	0/0:20:20,0:30:0,30,539:..	0/0:24:24,0:48:0,72,719:..	0/0:22:22,0:48:0,69,689:..	0/0:21:21,0:50:0,66,659:..	0/0:24:24,0:48:0,54,779:..	0/0:13:13,0:39:0,39,389:..	0/0:18:18,0:50:0,75,749:..	0/1:21:12,9:38:38,0,54:..	0/0:16:16,0:48:0,60,599:..	0/0:26:26,0:50:0,99,989:..	0/0:21:21,0:50:0,66,659:..	0/0:16:16,0:48:0,81,809:..	0/0:24:24,0:50:0,75,749:..	0/0:19:19,0:50:0,63,629:..	0/0:18:18,0:48:0,66,659:..	0/0:19:19,0:50:0,69,689:..	0/0:30:30,0:50:0,96,959:..	0/0:20:20,0:48:0,60,599:..	0/0:22:22,0:50:0,75,749:..	0/0:21:21,0:50:0,75,749:..	0/0:24:24,0:50:0,93,929:..	0/0:21:21,0:48:0,72,719:..	0/0:21:21,0:50:0,75,749:..	0/0:20:20,0:48:0,69,689:..	0/0:17:17,0:50:0,60,599:..	0/0:23:23,0:50:0,96,959:..	seq2
chr4	106053757	chr4_106053757_A_T	A	T	47	AF=0.013889;AQ=47	GT:DP:AD:GQ:PL:RNC	0/0:28:28,0:50:0,93,929:..	0/0:19:19,0:50:0,75,749:..	0/0:33:33,0:48:0,111,1109:..	0/0:19:19,0:50:0,60,599:..	0/0:26:26,0:50:0,54,779:..	0/0:20:20,0:48:0,75,749:..	0/0:18:18,0:50:0,72,719:..	0/0:12:12,0:36:0,39,389:..	0/0:16:16,0:48:0,75,749:..	0/0:25:25,0:50:0,75,749:..	0/0:21:21,0:50:0,66,659:..	0/0:25:25,0:45:0,45,689:..	0/0:25:25,0:48:0,75,749:..	0/0:19:19,0:48:0,81,809:..	0/0:24:24,0:50:0,75,749:..	0/0:16:16,0:48:0,69,689:..	0/0:29:29,0:50:0,87,869:..	0/0:19:19,0:50:0,63,629:..	0/0:23:23,0:50:0,72,719:..	0/0:21:21,0:50:0,75,749:..	0/0:23:23,0:50:0,69,689:..	0/0:23:23,0:48:0,69,689:..	0/0:18:18,0:50:0,63,629:..	0/0:28:28,0:50:0,105,1049:..	0/0:24:24,0:50:0,72,719:..	0/0:22:22,0:50:0,75,749:..	0/1:32:14,18:46:47,0,52:..	0/0:18:18,0:50:0,60,599:..	0/0:21:21,0:50:0,69,689:..	0/0:21:21,0:50:0,75,749:..	0/0:23:23,0:50:0,69,689:..	0/0:18:18,0:50:0,57,569:..	0/0:23:23,0:50:0,69,689:..	0/0:23:23,0:48:0,84,839:..	0/0:21:21,0:50:0,63,629:..	0/0:22:22,0:48:0,69,689:..	seq2
chr4	113920565	chr4_113920565_A_G	A	G	33	AF=0.013889;AQ=33	GT:DP:AD:GQ:PL:RNC	0/0:21:21,0:48:0,75,749:..	0/0:25:25,0:48:0,75,749:..	0/0:22:22,0:50:0,69,689:..	0/0:17:17,0:50:0,54,539:..	0/0:16:16,0:48:0,51,509:..	0/0:17:17,0:50:0,93,929:..	0/0:11:11,0:33:0,33,329:..	0/0:18:18,0:50:0,54,539:..	0/0:23:23,0:50:0,69,689:..	0/0:21:21,0:50:0,66,659:..	0/0:24:24,0:50:0,75,749:..	0/0:22:22,0:48:0,75,749:..	0/0:18:18,0:50:0,60,599:..	0/0:19:19,0:27:0,27,509:..	0/0:21:21,0:50:0,63,629:..	0/0:20:20,0:50:0,66,659:..	0/0:23:23,0:50:0,69,689:..	0/0:12:12,0:36:0,36,359:..	0/0:16:16,0:48:0,60,599:..	0/0:19:19,0:50:0,75,749:..	0/0:19:19,0:50:0,57,569:..	0/1:34:16,17:33:33,0,47:..	0/0:19:19,0:50:0,57,569:..	0/0:22:22,0:48:0,66,659:..	0/0:16:16,0:48:0,69,689:..	0/0:23:23,0:50:0,69,689:..	0/0:18:18,0:50:0,75,749:..	0/0:25:25,0:50:0,75,749:..	0/0:16:16,0:48:0,48,479:..	0/0:18:18,0:48:0,84,839:..	0/0:16:16,0:48:0,51,509:..	0/0:18:18,0:50:0,63,629:..	0/0:17:17,0:50:0,51,509:..	0/0:16:16,0:48:0,48,479:..	0/0:23:23,0:48:0,69,689:..	0/0:18:18,0:50:0,66,659:..	seq2
chr4	140928467	chr4_140928467_A_T	A	T	40	AF=0.013889;AQ=40	GT:DP:AD:GQ:PL:RNC	0/0:24:24,0:48:0,75,749:..	0/0:22:22,0:48:0,72,719:..	0/0:22:22,0:50:0,75,749:..	0/0:23:23,0:48:0,90,899:..	0/0:24:24,0:50:0,75,749:..	0/0:20:20,0:50:0,60,599:..	0/0:22:22,0:48:0,84,839:..	0/0:17:17,0:50:0,60,599:..	0/0:20:20,0:50:0,66,659:..	0/0:18:18,0:50:0,63,629:..	0/0:20:20,0:48:0,66,659:..	0/0:26:26,0:50:0,105,1049:..	0/0:16:16,0:48:0,48,479:..	0/0:24:24,0:50:0,75,749:..	0/0:20:20,0:50:0,66,659:..	0/0:19:19,0:50:0,66,659:..	0/1:37:19,18:40:40,0,51:..	0/0:22:22,0:50:0,69,689:..	0/0:23:23,0:50:0,72,719:..	0/0:22:22,0:50:0,75,749:..	0/0:22:22,0:48:0,69,689:..	0/0:23:23,0:48:0,108,1079:..	0/0:21:21,0:50:0,63,629:..	0/0:28:28,0:50:0,93,929:..	0/0:28:28,0:50:0,99,989:..	0/0:28:28,0:50:0,90,899:..	0/0:25:25,0:50:0,108,1079:..	0/0:20:20,0:50:0,84,839:..	0/0:21:21,0:50:0,75,749:..	0/0:24:24,0:50:0,99,989:..	0/0:23:23,0:48:0,72,719:..	0/0:14:14,0:42:0,42,419:..	0/0:27:27,0:50:0,93,929:..	0/0:20:20,0:50:0,60,599:..	0/0:23:23,0:50:0,75,749:..	0/0:24:24,0:50:0,72,719:..	seq2
chr4	144387122	chr4_144387122_G_T	G	T	39	AF=0.013889;AQ=39	GT:DP:AD:GQ:PL:RNC	0/0:28:28,0:50:0,120,1199:..	0/0:19:19,0:50:0,78,779:..	0/0:20:20,0:50:0,99,989:..	0/0:19:19,0:48:0,129,1289:..	0/0:22:22,0:48:0,72,719:..	0/0:24:24,0:50:0,93,929:..	0/0:17:17,0:50:0,69,689:..	0/0:22:22,0:48:0,114,1139:..	0/0:18:18,0:50:0,57,569:..	0/0:23:23,0:48:0,90,899:..	0/0:17:17,0:50:0,60,599:..	0/0:24:24,0:50:0,120,1199:..	0/0:22:22,0:48:0,72,719:..	0/0:16:16,0:48:0,57,569:..	0/0:22:22,0:50:0,96,959:..	0/1:19:10,9:39:39,0,53:..	0/0:16:16,0:48:0,72,719:..	0/0:20:20,0:50:0,72,719:..	0/0:20:20,0:50:0,117,1169:..	0/0:29:29,0:50:0,102,1019:..	0/0:26:26,0:48:0,99,989:..	0/0:26:26,0:50:0,87,869:..	0/0:16:16,0:48:0,108,1079:..	0/0:19:19,0:50:0,102,1019:..	0/0:16:16,0:48:0,63,629:..	0/0:22:22,0:48:0,78,779:..	0/0:21:21,0:50:0,69,689:..	0/0:25:25,0:50:0,75,749:..	0/0:16:16,0:48:0,84,839:..	0/0:20:20,0:50:0,78,779:..	0/0:24:24,0:50:0,93,929:..	0/0:25:25,0:50:0,96,959:..	0/0:25:25,0:48:0,126,1259:..	0/0:27:27,0:50:0,90,899:..	0/0:20:20,0:50:0,60,599:..	0/0:20:20,0:50:0,111,1109:..	seq2
chr4	150493125	chr4_150493125_C_T	C	T	24	AF=0.013889;AQ=24	GT:DP:AD:GQ:PL:RNC	0/0:17:17,0:50:0,72,719:..	0/0:22:22,0:50:0,69,689:..	0/0:19:19,0:50:0,72,719:..	0/0:21:21,0:48:0,66,659:..	0/0:24:24,0:50:0,87,869:..	0/0:16:16,0:48:0,66,899:..	0/0:26:26,0:48:0,93,929:..	0/0:19:19,0:50:0,84,839:..	0/0:23:23,0:50:0,72,719:..	0/0:16:16,0:48:0,63,629:..	0/0:26:26,0:50:0,99,989:..	0/0:18:18,0:50:0,105,1049:..	0/0:25:25,0:48:0,99,989:..	0/0:20:20,0:48:0,66,899:..	0/0:23:23,0:50:0,93,929:..	0/0:16:16,0:48:0,48,479:..	0/0:15:15,0:45:0,45,449:..	0/0:24:24,0:50:0,72,719:..	0/0:19:19,0:50:0,66,659:..	0/0:17:17,0:50:0,51,509:..	0/0:20:20,0:50:0,75,749:..	0/1:29:20,9:24:24,0,47:..	0/0:20:20,0:50:0,60,599:..	0/0:25:25,0:48:0,57,809:..	0/0:20:20,0:48:0,72,719:..	0/0:19:19,0:50:0,75,749:..	0/0:26:26,0:50:0,105,1049:..	0/0:24:24,0:48:0,75,749:..	0/0:25:25,0:48:0,117,1169:..	0/0:22:22,0:50:0,96,959:..	0/0:21:21,0:50:0,75,749:..	0/0:19:19,0:48:0,72,719:..	0/0:20:20,0:50:0,60,599:..	0/0:19:19,0:50:0,84,839:..	0/0:21:21,0:50:0,66,659:..	0/0:21:21,0:48:0,84,839:..	seq2
chr4	156273465	chr4_156273465_C_T	C	T	38	AF=0.013889;AQ=38	GT:DP:AD:GQ:PL:RNC	0/0:24:24,0:50:0,90,899:..	0/0:21:21,0:50:0,75,749:..	0/0:21:21,0:50:0,69,689:..	0/0:23:23,0:50:0,75,749:..	0/0:21:21,0:48:0,96,959:..	0/0:24:24,0:48:0,99,989:..	0/0:20:20,0:48:0,75,749:..	0/1:21:10,11:38:38,0,51:..	0/0:25:25,0:50:0,87,869:..	0/0:22:22,0:50:0,102,1019:..	0/0:22:22,0:48:0,75,749:..	0/0:24:24,0:48:0,96,959:..	0/0:19:19,0:48:0,72,719:..	0/0:24:24,0:48:0,69,929:..	0/0:28:28,0:50:0,138,1379:..	0/0:25:25,0:50:0,99,989:..	0/0:25:25,0:50:0,75,749:..	0/0:16:16,0:48:0,69,689:..	0/0:20:20,0:50:0,69,689:..	0/0:21:21,0:48:0,84,839:..	0/0:17:17,0:50:0,51,509:..	0/0:25:25,0:50:0,90,1139:..	0/0:25:25,0:50:0,99,989:..	0/0:30:30,0:50:0,105,1049:..	0/0:26:26,0:50:0,87,869:..	0/0:23:23,0:48:0,93,929:..	0/0:23:23,0:48:0,120,1199:..	0/0:22:22,0:50:0,66,659:..	0/0:18:18,0:50:0,72,719:..	0/0:17:17,0:48:0,69,689:..	0/0:20:20,0:48:0,75,749:..	0/0:22:22,0:50:0,69,689:..	0/0:25:25,0:50:0,108,1319:..	0/0:16:16,0:48:0,66,659:..	0/0:24:24,0:48:0,72,719:..	0/0:23:23,0:48:0,117,1169:..	seq2
chr5	3392343	chr5_3392343_G_T	G	T	44	AF=0.013889;AQ=44	GT:DP:AD:GQ:PL:RNC	0/0:26:26,0:50:0,84,839:..	0/0:38:38,0:50:0,120,1199:..	0/0:50:50,0:50:0,156,1559:..	0/0:46:46,0:50:0,144,1439:..	0/0:53:53,0:50:0,171,1709:..	0/0:49:49,0:50:0,147,1469:..	0/0:51:51,0:50:0,153,1529:..	0/0:29:29,0:50:0,90,899:..	0/0:26:26,0:50:0,78,779:..	0/0:48:48,0:50:0,150,1499:..	0/0:41:41,0:50:0,126,1259:..	0/0:45:45,0:50:0,135,1349:..	0/0:49:49,0:50:0,153,1529:..	0/0:49:49,0:50:0,156,1559:..	0/0:43:43,0:50:0,132,1319:..	0/0:45:45,0:50:0,141,1409:..	0/0:50:50,0:50:0,153,1529:..	0/0:46:46,0:50:0,153,1529:..	0/0:46:46,0:50:0,147,1469:..	0/0:36:36,0:50:0,108,1079:..	0/0:49:49,0:50:0,153,1529:..	0/0:49:49,0:50:0,150,1499:..	0/0:36:36,0:50:0,111,1109:..	0/0:53:53,0:50:0,159,1589:..	0/0:41:41,0:50:0,129,1289:..	0/0:31:31,0:50:0,96,959:..	0/0:50:50,0:50:0,150,1499:..	0/0:38:38,0:50:0,114,1139:..	0/0:56:56,0:50:0,171,1709:..	0/0:47:47,0:50:0,141,1409:..	0/0:38:38,0:50:0,114,1139:..	0/0:47:47,0:50:0,141,1409:..	0/0:36:36,0:50:0,108,1079:..	0/1:50:31,19:44:44,0,54:..	0/0:46:46,0:50:0,141,1409:..	0/0:41:41,0:50:0,129,1289:..	seq2
chr5	3872482	chr5_3872482_C_T	C	T	29	AF=0.013889;AQ=29	GT:DP:AD:GQ:PL:RNC	0/0:16:16,0:48:0,69,689:..	0/0:13:13,0:39:0,39,389:..	0/0:20:20,0:50:0,60,599:..	0/0:26:26,0:50:0,78,779:..	0/0:16:16,0:48:0,57,569:..	0/0:19:19,0:50:0,66,659:..	0/0:16:16,0:48:0,48,479:..	0/0:20:20,0:50:0,90,899:..	0/0:17:17,0:50:0,120,1199:..	0/0:21:21,0:50:0,72,719:..	0/0:26:26,0:50:0,105,1049:..	0/0:18:18,0:48:0,66,659:..	0/0:23:23,0:50:0,69,689:..	0/1:18:12,6:30:29,0,51:..	0/0:21:21,0:50:0,87,869:..	0/0:19:19,0:48:0,81,809:..	0/0:20:20,0:48:0,99,989:..	0/0:20:20,0:50:0,60,599:..	0/0:14:14,0:42:0,45,449:..	0/0:20:20,0:50:0,72,719:..	0/0:17:17,0:50:0,51,509:..	0/0:26:26,0:50:0,78,779:..	0/0:19:19,0:48:0,60,599:..	0/0:28:28,0:50:0,90,899:..	0/0:22:22,0:50:0,72,719:..	0/0:23:23,0:50:0,87,869:..	0/0:23:23,0:50:0,72,719:..	0/0:17:17,0:50:0,51,509:..	0/0:23:23,0:48:0,75,749:..	0/0:21:21,0:48:0,75,749:..	0/0:20:20,0:50:0,66,659:..	0/0:23:23,0:48:0,75,749:..	0/0:16:16,0:48:0,48,479:..	0/0:16:16,0:48:0,48,479:..	0/0:19:19,0:50:0,63,629:..	0/0:25:25,0:48:0,96,959:..	seq2
chr5	6161406	chr5_6161406_C_T	C	T	48	AF=0.013889;AQ=48	GT:DP:AD:GQ:PL:RNC	0/0:20:20,0:30:0,30,539:..	0/0:28:28,0:50:0,57,809:..	0/0:23:23,0:48:0,72,719:..	0/0:25:25,0:50:0,105,1049:..	0/0:28:28,0:50:0,93,929:..	0/0:33:33,0:50:0,99,989:..	0/0:23:23,0:48:0,72,719:..	0/0:22:22,0:50:0,69,689:..	0/0:23:23,0:50:0,75,749:..	0/1:28:12,16:48:48,0,55:..	0/0:21:21,0:50:0,63,629:..	0/0:24:24,0:48:0,81,809:..	0/0:22:22,0:50:0,69,689:..	0/0:25:25,0:50:0,75,749:..	0/0:22:22,0:48:0,72,719:..	0/0:26:26,0:48:0,105,1049:..	0/0:31:31,0:50:0,105,1049:..	0/0:24:24,0:50:0,72,719:..	0/0:32:32,0:50:0,66,899:..	0/0:25:25,0:50:0,75,749:..	0/0:23:23,0:50:0,72,719:..	0/0:34:34,0:50:0,102,1019:..	0/0:18:18,0:50:0,54,539:..	0/0:26:26,0:48:0,87,869:..	0/0:21:21,0:48:0,72,719:..	0/0:16:16,0:48:0,48,479:..	0/0:31:31,0:50:0,96,959:..	0/0:16:16,0:48:0,48,479:..	0/0:28:28,0:50:0,99,989:..	0/0:22:22,0:50:0,69,689:..	0/0:28:28,0:50:0,93,929:..	0/0:25:25,0:50:0,75,749:..	0/0:25:25,0:50:0,54,779:..	0/0:21:21,0:48:0,72,719:..	0/0:18:18,0:50:0,81,809:..	0/0:22:22,0:50:0,72,719:..	seq2
chr5	6403373	chr5_6403373_C_T	C	T	49	AF=0.013889;AQ=49	GT:DP:AD:GQ:PL:RNC	0/0:23:23,0:48:0,87,869:..	0/0:21:21,0:50:0,63,629:..	0/0:24:24,0:50:0,72,719:..	0/0:16:16,0:48:0,54,539:..	0/0:21:21,0:48:0,78,779:..	0/0:21:21,0:50:0,69,689:..	0/0:22:22,0:48:0,66,659:..	0/0:21:21,0:50:0,108,1079:..	0/0:14:14,0:42:0,42,419:..	0/0:20:20,0:48:0,63,629:..	0/0:19:19,0:50:0,72,719:..	0/0:18:18,0:48:0,57,569:..	0/1:26:11,15:48:49,0,53:..	0/0:25:25,0:50:0,75,749:..	0/0:21:21,0:50:0,69,689:..	0/0:21:21,0:48:0,75,749:..	0/0:19:19,0:48:0,60,599:..	0/0:21:21,0:48:0,75,749:..	0/0:22:22,0:50:0,75,749:..	0/0:23:23,0:50:0,72,719:..	0/0:16:16,0:48:0,48,479:..	0/0:26:26,0:48:0,99,989:..	0/0:16:16,0:48:0,48,479:..	0/0:22:22,0:48:0,117,1169:..	0/0:22:22,0:50:0,72,719:..	0/0:17:17,0:48:0,66,659:..	0/0:27:27,0:50:0,75,989:..	0/0:23:23,0:50:0,72,719:..	0/0:18:18,0:50:0,54,539:..	0/0:19:19,0:50:0,66,659:..	0/0:22:22,0:50:0,66,659:..	0/0:22:22,0:50:0,66,659:..	0/0:19:19,0:50:0,72,719:..	0/0:24:24,0:50:0,72,719:..	0/0:16:16,0:48:0,51,509:..	0/0:22:22,0:48:0,66,659:..	seq2
chr5	16456048	chr5_16456048_G_C	G	C	26	AF=0.013889;AQ=26	GT:DP:AD:GQ:PL:RNC	0/0:23:23,0:50:0,105,1049:..	0/0:21:21,0:50:0,78,779:..	0/0:18:18,0:50:0,54,539:..	0/0:22:22,0:50:0,72,719:..	0/0:17:17,0:50:0,54,539:..	0/0:17:17,0:50:0,69,689:..	0/0:10:10,0:30:0,30,299:..	0/0:14:14,0:42:0,42,419:..	0/0:16:16,0:48:0,93,929:..	0/0:16:16,0:48:0,48,479:..	0/0:25:25,0:50:0,99,989:..	0/0:21:21,0:50:0,75,749:..	0/1:28:12,16:26:26,0,31:..	0/0:23:23,0:50:0,90,899:..	0/0:20:20,0:48:0,87,869:..	0/0:24:24,0:50:0,75,749:..	0/0:16:16,0:48:0,99,989:..	0/0:23:23,0:50:0,75,749:..	0/0:25:25,0:48:0,75,749:..	0/0:27:27,0:50:0,84,839:..	0/0:17:17,0:50:0,66,659:..	0/0:24:24,0:48:0,75,749:..	0/0:22:22,0:50:0,69,689:..	0/0:23:23,0:50:0,78,779:..	0/0:18:18,0:50:0,63,629:..	0/0:30:30,0:50:0,96,959:..	0/0:25:25,0:50:0,78,779:..	0/0:14:14,0:42:0,45,449:..	0/0:20:20,0:50:0,66,659:..	0/0:17:17,0:50:0,54,539:..	0/0:17:17,0:50:0,111,1109:..	0/0:21:21,0:50:0,66,659:..	0/0:24:24,0:48:0,90,899:..	0/0:23:23,0:50:0,72,719:..	0/0:16:16,0:48:0,72,719:..	0/0:22:22,0:50:0,75,749:..	seq2
chr5	22406181	chr5_22406181_C_T	C	T	13	AF=0.013889;AQ=13	GT:DP:AD:GQ:PL:RNC	0/0:9:9,0:27:0,27,269:..	0/0:25:25,0:45:0,45,689:..	0/0:19:19,0:50:0,72,719:..	0/1:19:9,10:13:13,0,19:..	0/0:17:17,0:48:0,81,809:..	0/0:21:21,0:50:0,66,659:..	0/0:16:16,0:48:0,66,659:..	0/0:18:18,0:50:0,57,569:..	0/0:16:16,0:48:0,48,479:..	0/0:16:16,0:48:0,72,719:..	0/0:22:22,0:50:0,69,689:..	0/0:14:14,0:42:0,45,449:..	0/0:17:17,0:50:0,51,509:..	0/0:21:21,0:50:0,72,719:..	0/0:23:23,0:50:0,87,869:..	0/0:12:12,0:36:0,36,359:..	0/0:21:21,0:50:0,69,689:..	0/0:18:18,0:50:0,54,539:..	0/0:16:16,0:48:0,57,569:..	0/0:16:16,0:48:0,54,539:..	0/0:19:19,0:50:0,84,839:..	0/0:20:20,0:50:0,78,779:..	0/0:18:18,0:50:0,90,899:..	0/0:17:17,0:50:0,84,839:..	0/0:24:24,0:50:0,84,839:..	0/0:19:19,0:50:0,99,989:..	0/0:17:17,0:50:0,54,539:..	0/0:23:23,0:50:0,69,689:..	0/0:17:17,0:48:0,54,539:..	0/0:16:16,0:48:0,48,479:..	0/0:17:17,0:50:0,72,719:..	0/0:23:23,0:50:0,69,689:..	0/0:16:16,0:48:0,51,509:..	0/0:17:17,0:50:0,51,509:..	0/0:21:21,0:50:0,78,779:..	0/0:26:26,0:50:0,78,779:..	seq2
chr5	32083411	chr5_32083411_C_T	C	T	36	AF=0.013889;AQ=36	GT:DP:AD:GQ:PL:RNC	0/0:20:20,0:48:0,75,749:..	0/0:12:12,0:36:0,36,359:..	0/0:16:16,0:48:0,54,539:..	0/0:22:22,0:50:0,72,719:..	0/0:16:16,0:48:0,48,479:..	0/0:22:22,0:50:0,69,689:..	0/0:23:23,0:50:0,69,689:..	0/0:12:12,0:36:0,36,359:..	0/0:18:18,0:50:0,60,599:..	0/0:24:24,0:50:0,72,719:..	0/0:21:21,0:50:0,66,659:..	0/0:19:19,0:50:0,57,569:..	0/0:18:18,0:24:0,24,479:..	0/0:11:11,0:33:0,33,329:..	0/0:18:18,0:50:0,57,569:..	0/0:17:17,0:50:0,57,569:..	0/1:20:10,10:36:36,0,50:..	0/0:16:16,0:48:0,48,479:..	0/0:18:18,0:50:0,54,539:..	0/0:25:25,0:48:0,75,749:..	0/0:22:22,0:48:0,66,659:..	0/0:17:17,0:48:0,60,599:..	0/0:21:21,0:48:0,63,629:..	0/0:27:27,0:50:0,81,809:..	0/0:16:16,0:48:0,48,479:..	0/0:20:20,0:50:0,63,629:..	0/0:25:25,0:48:0,75,749:..	0/0:17:17,0:50:0,51,509:..	0/0:16:16,0:48:0,48,479:..	0/0:17:17,0:50:0,54,539:..	0/0:21:21,0:50:0,66,659:..	0/0:18:18,0:50:0,54,539:..	0/0:22:22,0:50:0,66,659:..	0/0:16:16,0:48:0,48,479:..	0/0:13:13,0:9:0,9,329:..	0/0:22:22,0:50:0,66,659:..	seq2
chr5	32806616	chr5_32806616_C_T	C	T	33	AF=0.013889;AQ=33	GT:DP:AD:GQ:PL:RNC	0/0:34:34,0:50:0,75,989:..	0/0:39:39,0:50:0,117,1169:..	0/0:38:38,0:50:0,114,1139:..	0/0:53:53,0:50:0,159,1589:..	0/0:40:40,0:50:0,120,1199:..	0/0:41:41,0:50:0,93,1169:..	0/0:34:34,0:50:0,102,1019:..	0/0:30:30,0:50:0,105,1049:..	0/1:32:18,14:27:33,0,27:..	0/0:33:33,0:39:0,39,869:..	0/0:36:36,0:50:0,108,1079:..	0/0:49:49,0:50:0,153,1529:..	0/0:40:40,0:50:0,120,1199:..	0/0:42:42,0:50:0,126,1259:..	0/0:48:48,0:50:0,144,1439:..	0/0:38:38,0:50:0,114,1139:..	0/0:40:40,0:50:0,120,1199:..	0/0:34:34,0:50:0,105,1049:..	0/0:40:40,0:50:0,120,1199:..	0/0:39:39,0:50:0,99,1229:..	0/0:38:38,0:50:0,114,1139:..	0/0:31:31,0:50:0,102,1019:..	0/0:36:36,0:50:0,111,1109:..	0/0:55:55,0:50:0,168,1679:..	0/0:29:29,0:50:0,96,959:..	0/0:33:33,0:50:0,99,989:..	0/0:45:45,0:50:0,147,1469:..	0/0:41:41,0:50:0,132,1319:..	0/0:34:34,0:50:0,102,1019:..	0/0:43:43,0:50:0,129,1289:..	0/0:32:32,0:50:0,99,989:..	0/0:38:38,0:50:0,117,1169:..	0/0:41:41,0:50:0,126,1259:..	0/0:31:31,0:50:0,120,1199:..	0/0:32:32,0:50:0,99,989:..	0/0:46:46,0:50:0,141,1409:..	seq2
chr5	34850947	chr5_34850947_G_A	G	A	50	AF=0.013889;AQ=50	GT:DP:AD:GQ:PL:RNC	0/0:25:25,0:50:0,75,749:..	0/0:22:22,0:36:0,36,599:..	0/0:20:20,0:50:0,72,719:..	0/0:20:20,0:50:0,66,659:..	0/0:18:18,0:50:0,69,689:..	0/0:17:17,0:48:0,63,629:..	0/0:25:25,0:48:0,75,749:..	0/0:21:21,0:50:0,66,659:..	0/0:19:19,0:48:0,96,959:..	0/0:17:17,0:50:0,75,749:..	0/0:20:20,0:50:0,66,659:..	0/0:25:25,0:50:0,75,749:..	0/0:22:22,0:50:0,69,689:..	0/0:21:21,0:50:0,63,629:..	0/0:20:20,0:50:0,60,599:..	0/0:22:22,0:50:0,69,689:..	0/0:17:17,0:48:0,60,599:..	0/0:16:16,0:48:0,48,479:..	0/0:18:18,0:50:0,63,629:..	0/0:33:33,0:50:0,105,1049:..	0/0:24:24,0:50:0,72,719:..	0/0:25:25,0:50:0,120,1199:..	0/0:23:23,0:50:0,69,689:..	0/0:24:24,0:50:0,72,719:..	0/0:17:17,0:50:0,57,569:..	0/0:24:24,0:50:0,75,749:..	0/0:28:28,0:50:0,132,1319:..	0/0:17:17,0:50:0,57,569:..	0/0:17:17,0:50:0,54,539:..	0/0:19:19,0:50:0,63,629:..	0/0:22:22,0:48:0,69,689:..	0/0:25:25,0:50:0,75,749:..	0/0:23:23,0:50:0,75,749:..	0/1:19:6,13:47:50,0,49:..	0/0:18:18,0:50:0,60,599:..	0/0:19:19,0:50:0,72,719:..	seq2
chr5	37315576	chr5_37315576_C_T	C	T	43	AF=0.013889;AQ=43	GT:DP:AD:GQ:PL:RNC	0/0:20:20,0:50:0,90,899:..	0/0:20:20,0:50:0,63,629:..	0/0:19:19,0:50:0,93,929:..	0/0:16:16,0:48:0,54,539:..	0/0:18:18,0:50:0,72,719:..	0/0:19:19,0:50:0,60,599:..	0/0:22:22,0:48:0,84,839:..	0/0:22:22,0:50:0,75,749:..	0/0:23:23,0:50:0,69,689:..	0/0:22:22,0:48:0,72,719:..	0/0:22:22,0:48:0,78,779:..	0/0:19:19,0:50:0,75,749:..	0/0:19:19,0:48:0,78,779:..	0/0:23:23,0:48:0,75,749:..	0/0:22:22,0:48:0,69,689:..	0/0:21:21,0:50:0,63,629:..	0/0:22:22,0:48:0,78,779:..	0/0:24:24,0:48:0,78,779:..	0/1:20:7,13:43:43,0,52:..	0/0:22:22,0:48:0,72,719:..	0/0:23:23,0:50:0,75,749:..	0/0:28:28,0:50:0,96,959:..	0/0:20:20,0:50:0,66,659:..	0/0:22:22,0:50:0,93,929:..	0/0:24:24,0:50:0,93,929:..	0/0:24:24,0:50:0,78,779:..	0/0:27:27,0:50:0,87,869:..	0/0:21:21,0:50:0,111,1109:..	0/0:18:18,0:48:0,93,929:..	0/0:17:17,0:50:0,66,659:..	0/0:21:21,0:50:0,66,659:..	0/0:22:22,0:50:0,72,719:..	0/0:22:22,0:50:0,66,659:..	0/0:17:17,0:50:0,63,629:..	0/0:19:19,0:48:0,72,719:..	0/0:26:26,0:50:0,99,989:..	seq2
chr5	41584853	chr5_41584853_T_C	T	C	33	AF=0.013889;AQ=33	GT:DP:AD:GQ:PL:RNC	0/0:22:22,0:48:0,66,659:..	0/0:20:20,0:50:0,60,599:..	0/0:25:25,0:50:0,75,749:..	0/0:12:12,0:36:0,39,389:..	0/0:23:23,0:48:0,93,929:..	0/0:17:17,0:50:0,75,749:..	0/0:20:20,0:50:0,66,659:..	0/0:20:20,0:50:0,69,689:..	0/0:19:19,0:48:0,75,749:..	0/0:23:23,0:50:0,72,719:..	0/0:18:18,0:50:0,57,569:..	0/0:21:21,0:50:0,66,659:..	0/0:17:17,0:50:0,66,659:..	0/0:21:21,0:48:0,84,839:..	0/0:21:21,0:48:0,75,749:..	0/0:17:17,0:50:0,51,509:..	0/0:20:20,0:48:0,75,749:..	0/0:19:19,0:48:0,57,569:..	0/0:16:16,0:48:0,75,749:..	0/0:26:26,0:50:0,90,899:..	0/0:25:25,0:50:0,75,749:..	0/0:23:23,0:50:0,69,689:..	0/0:12:12,0:36:0,36,359:..	0/0:24:24,0:48:0,99,989:..	0/0:17:17,0:50:0,72,719:..	0/0:19:19,0:50:0,66,659:..	0/0:23:23,0:48:0,75,749:..	0/1:27:19,8:34:33,0,53:..	0/0:19:19,0:27:0,27,509:..	0/0:25:25,0:50:0,75,749:..	0/0:17:17,0:50:0,69,689:..	0/0:21:21,0:50:0,81,809:..	0/0:24:24,0:48:0,75,749:..	0/0:21:21,0:50:0,78,779:..	0/0:18:18,0:50:0,72,719:..	0/0:16:16,0:48:0,75,749:..	seq2
chr5	42383424	chr5_42383424_A_T	A	T	47	AF=0.013889;AQ=47	GT:DP:AD:GQ:PL:RNC	0/0:17:17,0:48:0,57,569:..	0/0:15:15,0:45:0,45,449:..	0/0:16:16,0:48:0,51,509:..	0/0:17:17,0:50:0,51,509:..	0/0:20:20,0:48:0,63,629:..	0/0:16:16,0:48:0,63,629:..	0/0:16:16,0:48:0,48,479:..	0/0:16:16,0:48:0,60,599:..	0/0:22:22,0:50:0,72,719:..	0/0:23:23,0:50:0,75,749:..	0/0:20:20,0:48:0,63,629:..	0/0:21:21,0:50:0,72,719:..	0/0:18:18,0:50:0,57,569:..	0/0:23:23,0:50:0,69,689:..	0/0:16:16,0:48:0,54,539:..	0/0:21:21,0:50:0,66,659:..	0/0:16:16,0:48:0,48,479:..	0/0:17:17,0:48:0,51,509:..	0/0:26:26,0:48:0,51,749:..	0/0:25:25,0:45:0,45,689:..	0/0:19:19,0:50:0,66,659:..	0/0:23:23,0:50:0,69,689:..	0/0:16:16,0:48:0,60,599:..	0/0:17:17,0:48:0,57,569:..	0/0:20:20,0:50:0,66,659:..	0/0:24:24,0:48:0,75,749:..	0/0:17:17,0:50:0,51,509:..	0/0:23:23,0:48:0,69,689:..	0/0:24:24,0:50:0,90,899:..	0/0:14:14,0:42:0,42,419:..	0/0:27:27,0:50:0,81,809:..	0/0:16:16,0:48:0,48,479:..	0/0:19:19,0:50:0,66,659:..	0/1:22:8,14:41:47,0,41:..	0/0:23:23,0:39:0,39,629:..	0/0:17:17,0:48:0,51,509:..	seq2
chr5	42445418	chr5_42445418_G_A	G	A	40	AF=0.013889;AQ=40	GT:DP:AD:GQ:PL:RNC	0/0:16:16,0:48:0,48,479:..	0/0:16:16,0:48:0,48,479:..	0/0:19:19,0:50:0,66,659:..	0/0:24:24,0:50:0,78,779:..	0/0:21:21,0:50:0,81,809:..	0/0:21:21,0:48:0,63,629:..	0/0:23:23,0:39:0,39,629:..	0/0:17:17,0:48:0,66,659:..	0/0:13:13,0:39:0,39,389:..	0/0:25:25,0:50:0,123,1229:..	0/0:25:25,0:50:0,111,1109:..	0/0:25:25,0:50:0,111,1109:..	0/0:21:21,0:50:0,84,839:..	0/0:28:28,0:48:0,96,959:..	0/0:24:24,0:48:0,105,1049:..	0/0:21:21,0:33:0,33,569:..	0/0:24:24,0:48:0,90,899:..	0/0:16:16,0:48:0,54,539:..	0/0:16:16,0:48:0,48,479:..	0/0:25:25,0:45:0,45,689:..	0/0:20:20,0:30:0,30,539:..	0/0:26:26,0:50:0,90,899:..	0/0:21:21,0:50:0,72,719:..	0/0:26:26,0:48:0,105,1049:..	0/0:15:15,0:45:0,45,449:..	0/0:19:19,0:50:0,57,569:..	0/0:28:28,0:50:0,96,959:..	0/0:23:23,0:50:0,78,779:..	0/0:23:23,0:50:0,87,869:..	0/0:22:22,0:50:0,90,899:..	0/0:21:21,0:50:0,72,719:..	0/0:24:24,0:48:0,72,719:..	0/1:29:12,17:40:40,0,51:..	0/0:17:17,0:50:0,72,719:..	0/0:20:20,0:48:0,66,659:..	0/0:20:20,0:50:0,72,719:..	seq2
chr5	43826257	chr5_43826257_G_A	G	A	46	AF=0.013889;AQ=46	GT:DP:AD:GQ:PL:RNC	0/0:22:22,0:48:0,96,959:..	0/0:21:21,0:50:0,69,689:..	0/0:24:24,0:48:0,114,1139:..	0/0:19:19,0:50:0,129,1289:..	0/0:21:21,0:50:0,66,659:..	0/0:18:18,0:50:0,75,989:..	0/0:16:16,0:48:0,111,1109:..	0/0:23:23,0:50:0,72,719:..	0/0:20:20,0:48:0,69,689:..	0/0:20:20,0:50:0,99,989:..	0/0:24:24,0:48:0,75,749:..	0/0:24:24,0:50:0,75,749:..	0/0:18:18,0:48:0,75,749:..	0/0:25:25,0:50:0,75,749:..	0/0:17:17,0:50:0,66,659:..	0/0:17:17,0:48:0,57,569:..	0/1:35:11,24:42:46,0,43:..	0/0:17:17,0:50:0,57,569:..	0/0:22:22,0:50:0,69,689:..	0/0:17:17,0:50:0,54,539:..	0/0:19:19,0:50:0,102,1019:..	0/0:24:24,0:50:0,117,1169:..	0/0:16:16,0:48:0,75,749:..	0/0:26:26,0:50:0,81,809:..	0/0:21:21,0:50:0,69,689:..	0/0:23:23,0:48:0,96,1199:..	0/0:22:22,0:50:0,66,899:..	0/0:19:19,0:48:0,66,659:..	0/0:19:19,0:50:0,63,629:..	0/0:21:21,0:50:0,99,989:..	0/0:23:23,0:50:0,69,689:..	0/0:19:19,0:48:0,66,659:..	0/0:17:17,0:50:0,87,869:..	0/0:19:19,0:50:0,66,659:..	0/0:23:23,0:50:0,99,989:..	0/0:25:25,0:50:0,75,749:..	seq2
chr5	44503043	chr5_44503043_G_C	G	C	23	AF=0.013889;AQ=23	GT:DP:AD:GQ:PL:RNC	0/0:16:16,0:48:0,87,869:..	0/0:25:25,0:50:0,90,899:..	0/0:24:24,0:48:0,84,839:..	0/0:16:16,0:48:0,117,1169:..	0/0:21:21,0:50:0,72,719:..	0/0:19:19,0:50:0,96,959:..	0/0:23:23,0:48:0,75,749:..	0/0:24:24,0:50:0,108,1079:..	0/0:19:19,0:50:0,57,569:..	0/0:26:26,0:50:0,93,929:..	0/0:24:24,0:50:0,72,719:..	0/0:21:21,0:50:0,72,719:..	0/0:25:25,0:50:0,96,959:..	0/0:20:20,0:50:0,72,719:..	0/0:18:18,0:50:0,111,1109:..	0/0:17:17,0:50:0,69,689:..	0/0:21:21,0:48:0,84,839:..	0/0:22:22,0:48:0,87,869:..	0/1:35:25,10:24:23,0,47:..	0/0:22:22,0:48:0,126,1259:..	0/0:21:21,0:48:0,81,809:..	0/0:25:25,0:50:0,93,929:..	0/0:16:16,0:48:0,48,479:..	0/0:21:21,0:50:0,87,869:..	0/0:19:19,0:50:0,72,719:..	0/0:26:26,0:50:0,84,839:..	0/0:16:16,0:48:0,99,989:..	0/0:16:16,0:48:0,48,479:..	0/0:27:27,0:50:0,84,839:..	0/0:29:29,0:50:0,108,1079:..	0/0:17:17,0:50:0,60,599:..	0/0:20:20,0:50:0,72,719:..	0/0:25:25,0:50:0,87,869:..	0/0:24:24,0:50:0,93,929:..	0/0:19:19,0:48:0,66,659:..	0/0:23:23,0:50:0,78,779:..	seq2
chr5	45863627	chr5_45863627_A_G	A	G	47	AF=0.013889;AQ=47	GT:DP:AD:GQ:PL:RNC	0/0:21:21,0:50:0,108,1079:..	0/0:16:16,0:48:0,48,479:..	0/0:25:25,0:50:0,75,749:..	0/0:24:24,0:48:0,96,959:..	0/0:24:24,0:48:0,75,749:..	0/0:17:17,0:48:0,69,689:..	0/0:16:16,0:48:0,69,689:..	0/0:20:20,0:50:0,72,719:..	0/0:22:22,0:48:0,66,659:..	0/0:26:26,0:48:0,72,959:..	0/0:25:25,0:50:0,78,779:..	0/0:24:24,0:48:0,102,1019:..	0/0:14:14,0:42:0,45,449:..	0/0:26:26,0:48:0,96,959:..	0/0:24:24,0:50:0,72,719:..	0/0:18:18,0:48:0,72,719:..	0/0:24:24,0:48:0,63,869:..	0/0:16:16,0:48:0,48,479:..	0/0:22:22,0:48:0,75,749:..	0/0:23:23,0:50:0,72,719:..	0/0:21:21,0:50:0,84,839:..	0/0:24:24,0:50:0,96,959:..	0/0:20:20,0:50:0,63,629:..	0/0:20:20,0:48:0,102,1019:..	0/0:16:16,0:48:0,57,569:..	0/0:21:21,0:50:0,75,749:..	0/0:25:25,0:50:0,75,749:..	0/1:24:8,16:46:47,0,51:..	0/0:24:24,0:50:0,75,749:..	0/0:16:16,0:48:0,48,479:..	0/0:25:25,0:50:0,81,809:..	0/0:18:18,0:48:0,60,599:..	0/0:22:22,0:48:0,90,899:..	0/0:16:16,0:48:0,63,629:..	0/0:16:16,0:48:0,48,479:..	0/0:20:20,0:48:0,66,659:..	seq2
chr5	53402886	chr5_53402886_T_A	T	A	40	AF=0.013889;AQ=40	GT:DP:AD:GQ:PL:RNC	0/0:18:18,0:50:0,54,539:..	0/0:23:23,0:48:0,93,929:..	0/0:25:25,0:50:0,75,749:..	0/0:22:22,0:50:0,72,959:..	0/0:20:20,0:50:0,60,599:..	0/0:29:29,0:50:0,129,1289:..	0/0:21:21,0:48:0,63,629:..	0/0:20:20,0:50:0,72,719:..	0/0:20:20,0:50:0,63,629:..	0/0:24:24,0:48:0,72,719:..	0/0:24:24,0:48:0,105,1049:..	0/0:23:23,0:50:0,72,719:..	0/0:23:23,0:48:0,75,749:..	0/0:20:20,0:48:0,63,629:..	0/0:24:24,0:50:0,78,779:..	0/0:22:22,0:50:0,66,659:..	0/0:22:22,0:50:0,72,719:..	0/0:20:20,0:50:0,60,599:..	0/0:21:21,0:50:0,63,629:..	0/0:19:19,0:50:0,66,659:..	0/0:26:26,0:50:0,81,809:..	0/0:22:22,0:50:0,72,719:..	0/1:24:11,13:40:40,0,53:..	0/0:28:28,0:50:0,99,989:..	0/0:25:25,0:50:0,75,749:..	0/0:25:25,0:48:0,75,749:..	0/0:26:26,0:50:0,99,989:..	0/0:20:20,0:50:0,96,959:..	0/0:24:24,0:50:0,72,719:..	0/0:22:22,0:50:0,96,959:..	0/0:26:26,0:50:0,99,989:..	0/0:23:23,0:50:0,72,719:..	0/0:23:23,0:50:0,81,809:..	0/0:18:18,0:50:0,99,989:..	0/0:21:21,0:50:0,84,839:..	0/0:21:21,0:50:0,72,719:..	seq2
chr5	56804423	chr5_56804423_G_C	G	C	33	AF=0.013889;AQ=33	GT:DP:AD:GQ:PL:RNC	0/0:18:18,0:50:0,69,689:..	0/0:16:16,0:48:0,78,779:..	0/0:16:16,0:48:0,75,749:..	0/0:17:17,0:50:0,54,539:..	0/0:24:24,0:50:0,75,749:..	0/1:21:12,9:34:33,0,49:..	0/0:23:23,0:48:0,72,719:..	0/0:21:21,0:48:0,72,719:..	0/0:19:19,0:48:0,75,749:..	0/0:24:24,0:48:0,75,749:..	0/0:22:22,0:48:0,72,719:..	0/0:17:17,0:50:0,66,659:..	0/0:16:16,0:48:0,54,539:..	0/0:24:24,0:48:0,84,839:..	0/0:24:24,0:48:0,72,719:..	0/0:24:24,0:48:0,48,719:..	0/0:24:24,0:48:0,75,749:..	0/0:20:20,0:50:0,60,599:..	0/0:15:15,0:45:0,45,449:..	0/0:23:23,0:50:0,102,1019:..	0/0:16:16,0:48:0,51,509:..	0/0:23:23,0:50:0,72,719:..	0/0:22:22,0:48:0,75,749:..	0/0:27:27,0:50:0,87,869:..	0/0:17:17,0:50:0,54,539:..	0/0:24:24,0:50:0,75,749:..	0/0:25:25,0:50:0,117,1169:..	0/0:23:23,0:48:0,81,809:..	0/0:22:22,0:50:0,69,689:..	0/0:16:16,0:48:0,48,479:..	0/0:16:16,0:48:0,48,479:..	0/0:24:24,0:48:0,75,749:..	0/0:22:22,0:50:0,66,659:..	0/0:23:23,0:48:0,78,779:..	0/0:22:22,0:50:0,72,719:..	0/0:20:20,0:50:0,66,899:..	seq2
chr5	57968694	chr5_57968694_T_A	T	A	21	AF=0.013889;AQ=21	GT:DP:AD:GQ:PL:RNC	0/0:20:20,0:48:0,96,959:..	0/0:15:15,0:45:0,45,449:..	0/0:19:19,0:48:0,66,659:..	0/0:25:25,0:45:0,45,689:..	0/0:16:16,0:48:0,48,479:..	0/0:22:22,0:50:0,72,719:..	0/0:17:17,0:50:0,72,719:..	0/0:23:23,0:48:0,72,719:..	0/0:16:16,0:48:0,57,569:..	0/0:19:19,0:50:0,66,659:..	0/0:25:25,0:48:0,84,839:..	0/0:16:16,0:48:0,48,479:..	0/0:20:20,0:50:0,60,839:..	0/0:21:21,0:50:0,63,629:..	0/0:16:16,0:48:0,69,689:..	0/0:23:23,0:50:0,72,719:..	0/0:23:23,0:50:0,78,779:..	0/0:20:20,0:50:0,60,599:..	0/0:16:16,0:48:0,48,479:..	0/0:26:26,0:50:0,84,839:..	0/0:17:17,0:48:0,54,539:..	0/0:26:26,0:50:0,102,1019:..	0/0:15:15,0:45:0,45,449:..	0/0:21:21,0:50:0,69,689:..	0/0:24:24,0:50:0,78,779:..	0/0:22:22,0:50:0,69,689:..	0/0:23:23,0:48:0,75,749:..	0/0:19:19,0:50:0,72,719:..	0/0:21:21,0:50:0,66,659:..	0/0:23:23,0:50:0,72,719:..	0/0:23:23,0:50:0,69,689:..	0/0:21:21,0:50:0,75,749:..	0/0:17:17,0:50:0,66,659:..	0/1:32:23,9:21:21,0,44:..	0/0:16:16,0:48:0,63,629:..	0/0:22:22,0:48:0,69,689:..	seq2
chr5	58133369	chr5_58133369_C_A	C	A	19	AF=0.013889;AQ=19	GT:DP:AD:GQ:PL:RNC	0/0:24:24,0:50:0,99,989:..	0/0:19:19,0:50:0,69,689:..	0/0:21:21,0:50:0,75,749:..	0/0:20:20,0:48:0,99,989:..	0/0:22:22,0:48:0,78,779:..	0/0:25:25,0:48:0,75,989:..	0/1:31:23,8:20:19,0,45:..	0/0:20:20,0:50:0,66,659:..	0/0:16:16,0:48:0,60,599:..	0/0:19:19,0:48:0,60,599:..	0/0:19:19,0:50:0,66,659:..	0/0:16:16,0:48:0,63,629:..	0/0:17:17,0:50:0,72,719:..	0/0:22:22,0:48:0,105,1049:..	0/0:21:21,0:48:0,72,719:..	0/0:22:22,0:48:0,75,749:..	0/0:20:20,0:50:0,75,749:..	0/0:20:20,0:50:0,66,659:..	0/0:19:19,0:48:0,90,899:..	0/0:21:21,0:50:0,105,1049:..	0/0:17:17,0:50:0,69,689:..	0/0:22:22,0:50:0,90,899:..	0/0:17:17,0:50:0,78,779:..	0/0:21:21,0:50:0,102,1019:..	0/0:22:22,0:48:0,72,719:..	0/0:25:25,0:45:0,45,689:..	0/0:22:22,0:50:0,75,749:..	0/0:23:23,0:39:0,39,629:..	0/0:22:22,0:50:0,147,1469:..	0/0:19:19,0:50:0,57,569:..	0/0:24:24,0:48:0,78,779:..	0/0:18:18,0:48:0,99,989:..	0/0:22:22,0:48:0,75,749:..	0/0:24:24,0:48:0,93,929:..	0/0:19:19,0:48:0,57,569:..	0/0:24:24,0:50:0,87,869:..	seq2
chr5	70367521	chr5_70367521_A_C	A	C	16	AF=0.013889;AQ=16	GT:DP:AD:GQ:PL:RNC	0/0:25:25,0:48:0,81,809:..	0/0:23:23,0:39:0,39,629:..	0/0:14:14,0:42:0,42,419:..	0/0:14:14,0:42:0,42,419:..	0/0:17:17,0:50:0,78,779:..	0/0:22:22,0:50:0,66,659:..	0/0:23:23,0:50:0,72,719:..	0/0:17:17,0:21:0,21,449:..	0/0:12:12,0:36:0,36,359:..	0/0:25:25,0:50:0,75,749:..	0/0:20:20,0:50:0,60,599:..	0/0:23:23,0:50:0,75,749:..	0/0:16:16,0:48:0,57,569:..	0/0:20:20,0:50:0,84,839:..	0/0:29:29,0:50:0,102,1019:..	0/0:21:21,0:4:0,3,509:..	0/0:22:22,0:50:0,66,659:..	0/1:16:6,10:4:16,0,2:..	0/0:13:13,0:39:0,39,389:..	0/0:13:13,0:9:0,9,329:..	0/0:23:23,0:9:0,9,569:..	0/0:29:29,0:48:0,87,869:..	0/0:21:21,0:50:0,63,629:..	0/0:21:21,0:33:0,33,569:..	0/0:18:18,0:50:0,57,569:..	0/0:25:25,0:50:0,75,749:..	0/0:26:26,0:48:0,48,719:..	0/0:19:19,0:1:2,0,452:II	0/0:26:26,0:48:0,78,779:..	0/0:20:20,0:50:0,60,599:..	0/0:23:23,0:50:0,72,719:..	0/0:14:14,0:42:0,42,419:..	0/0:25:25,0:45:0,45,689:..	0/0:15:15,0:45:0,45,449:..	0/0:29:29,0:50:0,87,869:..	0/0:25:25,0:15:0,15,629:..	seq2
chr5	74205926	chr5_74205926_G_A	G	A	36	AF=0.013889;AQ=36	GT:DP:AD:GQ:PL:RNC	0/0:11:11,0:33:0,33,329:..	0/0:19:19,0:50:0,66,659:..	0/0:27:27,0:50:0,84,839:..	0/1:25:14,11:36:36,0,51:..	0/0:26:26,0:48:0,93,929:..	0/0:22:22,0:50:0,69,689:..	0/0:25:25,0:48:0,75,749:..	0/0:22:22,0:50:0,69,689:..	0/0:19:19,0:50:0,60,599:..	0/0:22:22,0:48:0,72,719:..	0/0:23:23,0:48:0,69,689:..	0/0:23:23,0:50:0,72,719:..	0/0:19:19,0:50:0,69,689:..	0/0:18:18,0:50:0,57,569:..	0/0:24:24,0:50:0,90,899:..	0/0:23:23,0:50:0,87,869:..	0/0:25:25,0:48:0,78,779:..	0/0:16:16,0:48:0,51,509:..	0/0:22:22,0:48:0,72,719:..	0/0:19:19,0:50:0,57,569:..	0/0:21:21,0:50:0,66,659:..	0/0:24:24,0:50:0,75,749:..	0/0:12:12,0:36:0,39,389:..	0/0:23:23,0:50:0,90,899:..	0/0:16:16,0:48:0,54,539:..	0/0:23:23,0:50:0,69,689:..	0/0:25:25,0:48:0,75,749:..	0/0:17:17,0:50:0,54,539:..	0/0:19:19,0:48:0,63,629:..	0/0:13:13,0:39:0,39,389:..	0/0:25:25,0:50:0,63,869:..	0/0:16:16,0:48:0,54,539:..	0/0:16:16,0:48:0,54,539:..	0/0:14:14,0:42:0,42,419:..	0/0:15:15,0:45:0,45,449:..	0/0:16:16,0:48:0,48,479:..	seq2
chr5	85141686	chr5_85141686_C_T	C	T	45	AF=0.013889;AQ=45	GT:DP:AD:GQ:PL:RNC	0/0:19:19,0:48:0,57,569:..	0/0:16:16,0:48:0,66,659:..	0/0:16:16,0:48:0,48,479:..	0/0:21:21,0:50:0,63,629:..	0/0:21:21,0:50:0,69,689:..	0/0:23:23,0:48:0,48,719:..	0/0:20:20,0:48:0,75,749:..	0/0:18:18,0:50:0,93,929:..	0/0:16:16,0:48:0,48,479:..	0/0:17:17,0:48:0,54,539:..	0/0:19:19,0:48:0,69,689:..	0/0:24:24,0:50:0,75,749:..	0/0:22:22,0:50:0,69,689:..	0/0:16:16,0:48:0,72,719:..	0/0:21:21,0:48:0,81,809:..	0/0:21:21,0:48:0,63,629:..	0/0:26:26,0:50:0,78,779:..	0/0:18:18,0:48:0,66,659:..	0/0:23:23,0:48:0,72,719:..	0/0:18:18,0:50:0,54,539:..	0/0:16:16,0:48:0,96,959:..	0/1:39:20,19:45:45,0,53:..	0/0:15:15,0:45:0,45,449:..	0/0:24:24,0:50:0,72,719:..	0/0:19:19,0:48:0,72,719:..	0/0:26:26,0:50:0,78,779:..	0/0:21:21,0:50:0,69,689:..	0/0:22:22,0:48:0,81,809:..	0/0:20:20,0:48:0,60,599:..	0/0:22:22,0:48:0,78,779:..	0/0:25:25,0:50:0,99,989:..	0/0:19:19,0:48:0,57,569:..	0/0:22:22,0:50:0,66,659:..	0/0:24:24,0:48:0,72,719:..	0/0:21:21,0:50:0,63,629:..	0/0:19:19,0:48:0,63,629:..	seq2
chr5	89449552	chr5_89449552_C_T	C	T	37	AF=0.013889;AQ=37	GT:DP:AD:GQ:PL:RNC	0/0:19:19,0:50:0,63,629:..	0/0:16:16,0:48:0,48,479:..	0/0:22:22,0:50:0,72,719:..	0/0:24:24,0:48:0,96,959:..	0/0:21:21,0:50:0,69,929:..	0/0:24:24,0:48:0,63,869:..	0/0:21:21,0:50:0,69,689:..	0/0:19:19,0:48:0,96,959:..	0/0:24:24,0:48:0,72,719:..	0/0:17:17,0:50:0,60,599:..	0/0:25:25,0:48:0,78,779:..	0/0:20:20,0:50:0,84,839:..	0/0:16:16,0:48:0,54,539:..	0/1:29:19,10:38:37,0,59:..	0/0:16:16,0:48:0,84,839:..	0/0:24:24,0:50:0,75,749:..	0/0:27:27,0:50:0,108,1079:..	0/0:23:23,0:50:0,75,749:..	0/0:20:20,0:50:0,72,719:..	0/0:24:24,0:50:0,72,719:..	0/0:22:22,0:48:0,78,779:..	0/0:30:30,0:50:0,132,1319:..	0/0:18:18,0:50:0,54,539:..	0/0:22:22,0:48:0,84,839:..	0/0:18:18,0:50:0,57,569:..	0/0:18:18,0:50:0,57,569:..	0/0:23:23,0:50:0,75,749:..	0/0:23:23,0:48:0,69,689:..	0/0:21:21,0:48:0,69,689:..	0/0:25:25,0:50:0,96,959:..	0/0:24:24,0:48:0,84,839:..	0/0:23:23,0:50:0,75,749:..	0/0:21:21,0:50:0,72,719:..	0/0:24:24,0:42:0,42,659:..	0/0:23:23,0:50:0,87,869:..	0/0:23:23,0:50:0,72,719:..	seq2
chr5	110325056	chr5_110325056_G_T	G	T	45	AF=0.013889;AQ=45	GT:DP:AD:GQ:PL:RNC	0/0:23:23,0:50:0,75,749:..	0/0:23:23,0:48:0,63,869:..	0/0:22:22,0:50:0,102,1019:..	0/0:20:20,0:48:0,99,989:..	0/0:24:24,0:50:0,78,779:..	0/1:23:8,15:44:45,0,50:..	0/0:23:23,0:50:0,105,1049:..	0/0:22:22,0:50:0,96,959:..	0/0:26:26,0:50:0,87,869:..	0/0:24:24,0:48:0,81,809:..	0/0:20:20,0:50:0,66,659:..	0/0:34:34,0:50:0,117,1169:..	0/0:23:23,0:50:0,105,1049:..	0/0:20:20,0:50:0,84,839:..	0/0:27:27,0:50:0,120,1199:..	0/0:21:21,0:50:0,66,659:..	0/0:28:28,0:50:0,138,1379:..	0/0:24:24,0:50:0,81,809:..	0/0:23:23,0:48:0,117,1169:..	0/0:16:16,0:48:0,96,959:..	0/0:22:22,0:48:0,90,899:..	0/0:26:26,0:50:0,114,1139:..	0/0:23:23,0:50:0,87,869:..	0/0:20:20,0:50:0,135,1349:..	0/0:19:19,0:50:0,69,689:..	0/0:23:23,0:50:0,81,809:..	0/0:26:26,0:50:0,93,929:..	0/0:23:23,0:50:0,87,869:..	0/0:25:25,0:50:0,87,869:..	0/0:17:17,0:50:0,93,929:..	0/0:17:17,0:50:0,63,629:..	0/0:21:21,0:50:0,78,779:..	0/0:23:23,0:50:0,72,719:..	0/0:25:25,0:48:0,81,809:..	0/0:24:24,0:50:0,120,1199:..	0/0:20:20,0:50:0,87,869:..	seq2
chr5	115083499	chr5_115083499_G_A	G	A	39	AF=0.013889;AQ=39	GT:DP:AD:GQ:PL:RNC	0/0:22:22,0:50:0,66,659:..	0/0:21:21,0:50:0,90,899:..	0/0:23:23,0:48:0,99,989:..	0/0:17:17,0:50:0,75,749:..	0/0:27:27,0:50:0,99,989:..	0/0:19:19,0:48:0,78,779:..	0/0:31:31,0:50:0,99,989:..	0/0:16:16,0:48:0,57,569:..	0/0:22:22,0:50:0,75,749:..	0/0:24:24,0:50:0,81,809:..	0/0:20:20,0:50:0,60,599:..	0/0:24:24,0:48:0,102,1019:..	0/0:27:27,0:48:0,69,929:..	0/0:26:26,0:48:0,108,1079:..	0/0:26:26,0:50:0,78,779:..	0/0:22:22,0:48:0,87,869:..	0/0:28:28,0:50:0,96,959:..	0/0:22:22,0:50:0,72,719:..	0/0:19:19,0:50:0,57,569:..	0/0:31:31,0:50:0,102,1019:..	0/0:24:24,0:48:0,102,1019:..	0/0:26:26,0:50:0,78,779:..	0/0:21:21,0:50:0,63,629:..	0/0:23:23,0:50:0,93,929:..	0/0:19:19,0:50:0,60,599:..	0/0:28:28,0:50:0,93,929:..	0/1:37:21,16:39:39,0,56:..	0/0:20:20,0:48:0,66,659:..	0/0:21:21,0:48:0,63,629:..	0/0:23:23,0:50:0,102,1019:..	0/0:21:21,0:50:0,72,719:..	0/0:21:21,0:50:0,75,749:..	0/0:20:20,0:50:0,60,599:..	0/0:20:20,0:50:0,75,749:..	0/0:18:18,0:50:0,75,749:..	0/0:28:28,0:50:0,102,1019:..	seq2
chr5	116228157	chr5_116228157_G_A	G	A	42	AF=0.013889;AQ=42	GT:DP:AD:GQ:PL:RNC	0/0:18:18,0:50:0,87,869:..	0/0:21:21,0:50:0,72,719:..	0/0:22:22,0:50:0,66,659:..	0/0:21:21,0:50:0,96,959:..	0/0:21:21,0:50:0,66,659:..	0/1:28:13,15:41:42,0,50:..	0/0:23:23,0:48:0,96,959:..	0/0:23:23,0:50:0,75,749:..	0/0:18:18,0:50:0,69,689:..	0/0:19:19,0:48:0,84,839:..	0/0:21:21,0:48:0,78,779:..	0/0:20:20,0:50:0,78,779:..	0/0:23:23,0:50:0,96,959:..	0/0:19:19,0:50:0,72,719:..	0/0:25:25,0:48:0,102,1019:..	0/0:19:19,0:48:0,78,779:..	0/0:26:26,0:50:0,87,869:..	0/0:18:18,0:50:0,63,629:..	0/0:21:21,0:50:0,63,629:..	0/0:16:16,0:48:0,48,479:..	0/0:22:22,0:48:0,90,899:..	0/0:22:22,0:48:0,123,1229:..	0/0:19:19,0:50:0,60,599:..	0/0:28:28,0:50:0,111,1109:..	0/0:16:16,0:48:0,84,839:..	0/0:23:23,0:48:0,90,899:..	0/0:16:16,0:48:0,48,479:..	0/0:22:22,0:50:0,117,1169:..	0/0:18:18,0:50:0,54,539:..	0/0:24:24,0:50:0,72,719:..	0/0:16:16,0:48:0,102,1019:..	0/0:23:23,0:48:0,75,749:..	0/0:22:22,0:48:0,75,749:..	0/0:17:17,0:50:0,75,749:..	0/0:17:17,0:50:0,57,569:..	0/0:25:25,0:50:0,96,959:..	seq2
chr5	120381477	chr5_120381477_C_T	C	T	16	AF=0.013889;AQ=16	GT:DP:AD:GQ:PL:RNC	0/0:20:20,0:50:0,60,599:..	0/0:24:24,0:48:0,84,839:..	0/0:20:20,0:48:0,63,629:..	0/0:19:19,0:48:0,66,659:..	0/0:18:18,0:48:0,57,569:..	0/0:21:21,0:48:0,75,749:..	0/0:20:20,0:50:0,63,629:..	0/0:16:16,0:48:0,48,479:..	0/0:21:21,0:48:0,63,629:..	0/1:31:25,6:16:16,0,43:..	0/0:25:25,0:50:0,75,749:..	0/0:19:19,0:50:0,105,1049:..	0/0:20:20,0:50:0,81,809:..	0/0:25:25,0:48:0,99,989:..	0/0:21:21,0:48:0,84,839:..	0/0:20:20,0:48:0,75,749:..	0/0:24:24,0:50:0,87,869:..	0/0:19:19,0:48:0,75,749:..	0/0:24:24,0:48:0,75,749:..	0/0:16:16,0:48:0,48,479:..	0/0:19:19,0:48:0,75,749:..	0/0:23:23,0:48:0,93,929:..	0/0:21:21,0:50:0,90,899:..	0/0:31:31,0:50:0,114,1139:..	0/0:22:22,0:48:0,90,899:..	0/0:25:25,0:48:0,78,779:..	0/0:22:22,0:50:0,105,1049:..	0/0:20:20,0:48:0,90,899:..	0/0:22:22,0:50:0,81,809:..	0/0:16:16,0:48:0,69,689:..	0/0:26:26,0:50:0,81,809:..	0/0:23:23,0:48:0,90,899:..	0/0:23:23,0:48:0,78,779:..	0/0:25:25,0:50:0,75,749:..	0/0:16:16,0:48:0,60,599:..	0/0:23:23,0:50:0,69,689:..	seq2
chr5	124325207	chr5_124325207_C_A	C	A	37	AF=0.013889;AQ=37	GT:DP:AD:GQ:PL:RNC	0/0:23:23,0:50:0,78,779:..	0/0:21:21,0:48:0,72,719:..	0/0:22:22,0:50:0,69,689:..	0/0:23:23,0:50:0,69,689:..	0/0:27:27,0:48:0,99,989:..	0/0:26:26,0:48:0,126,1259:..	0/0:28:28,0:50:0,84,839:..	0/1:22:13,9:38:37,0,48:..	0/0:18:18,0:50:0,60,599:..	0/0:22:22,0:48:0,102,1019:..	0/0:25:25,0:48:0,102,1019:..	0/0:24:24,0:50:0,138,1379:..	0/0:29:29,0:50:0,114,1139:..	0/0:26:26,0:48:0,78,779:..	0/0:20:20,0:48:0,81,809:..	0/0:16:16,0:48:0,69,689:..	0/0:23:23,0:48:0,96,959:..	0/0:29:29,0:50:0,96,959:..	0/0:22:22,0:48:0,93,929:..	0/0:21:21,0:48:0,87,869:..	0/0:26:26,0:50:0,81,809:..	0/0:29:29,0:50:0,99,989:..	0/0:18:18,0:50:0,54,539:..	0/0:28:28,0:50:0,123,1229:..	0/0:19:19,0:50:0,60,599:..	0/0:23:23,0:50:0,69,689:..	0/0:30:30,0:50:0,114,1139:..	0/0:25:25,0:50:0,114,1139:..	0/0:20:20,0:50:0,63,629:..	0/0:23:23,0:50:0,69,689:..	0/0:20:20,0:50:0,66,659:..	0/0:22:22,0:50:0,72,719:..	0/0:20:20,0:50:0,75,749:..	0/0:20:20,0:50:0,135,1349:..	0/0:26:26,0:48:0,108,1079:..	0/0:20:20,0:50:0,66,659:..	seq2
chr5	130711143	chr5_130711143_C_T	C	T	43	AF=0.013889;AQ=43	GT:DP:AD:GQ:PL:RNC	0/0:23:23,0:50:0,78,779:..	0/0:22:22,0:48:0,72,719:..	0/0:25:25,0:50:0,78,779:..	0/0:22:22,0:50:0,69,689:..	0/0:16:16,0:48:0,84,839:..	0/0:26:26,0:48:0,114,1139:..	0/0:23:23,0:50:0,90,899:..	0/0:16:16,0:48:0,48,479:..	0/0:21:21,0:50:0,84,839:..	0/0:23:23,0:50:0,87,869:..	0/0:17:17,0:50:0,57,569:..	0/0:20:20,0:50:0,69,689:..	0/0:22:22,0:50:0,72,719:..	0/0:21:21,0:48:0,87,869:..	0/0:31:31,0:50:0,105,1049:..	0/0:21:21,0:50:0,72,719:..	0/0:22:22,0:50:0,72,719:..	0/0:22:22,0:48:0,75,749:..	0/0:21:21,0:50:0,72,719:..	0/0:21:21,0:50:0,63,629:..	0/0:26:26,0:50:0,78,779:..	0/0:25:25,0:50:0,114,1139:..	0/1:45:25,20:43:43,0,59:..	0/0:25:25,0:48:0,132,1319:..	0/0:19:19,0:50:0,60,599:..	0/0:19:19,0:50:0,60,599:..	0/0:20:20,0:48:0,141,1409:..	0/0:26:26,0:50:0,81,809:..	0/0:20:20,0:50:0,72,719:..	0/0:23:23,0:39:0,39,629:..	0/0:18:18,0:48:0,75,749:..	0/0:24:24,0:48:0,87,869:..	0/0:21:21,0:50:0,75,749:..	0/0:16:16,0:48:0,72,719:..	0/0:25:25,0:50:0,75,749:..	0/0:24:24,0:50:0,99,989:..	seq2
chr5	130946306	chr5_130946306_T_A	T	A	42	AF=0.013889;AQ=42	GT:DP:AD:GQ:PL:RNC	0/0:21:21,0:50:0,66,659:..	0/0:19:19,0:48:0,75,749:..	0/0:24:24,0:50:0,93,929:..	0/0:21:21,0:50:0,69,689:..	0/0:19:19,0:50:0,60,599:..	0/0:19:19,0:50:0,69,689:..	0/0:20:20,0:48:0,48,719:..	0/0:16:16,0:48:0,87,869:..	0/0:17:17,0:48:0,72,719:..	0/0:22:22,0:50:0,102,1019:..	0/0:22:22,0:50:0,72,719:..	0/0:23:23,0:50:0,72,719:..	0/0:26:26,0:50:0,90,899:..	0/0:17:17,0:50:0,72,719:..	0/0:19:19,0:50:0,69,689:..	0/0:20:20,0:48:0,78,779:..	0/0:23:23,0:50:0,69,689:..	0/0:27:27,0:50:0,96,959:..	0/0:21:21,0:50:0,69,689:..	0/0:21:21,0:50:0,69,689:..	0/0:21:21,0:50:0,69,689:..	0/0:18:18,0:50:0,105,1049:..	0/0:25:25,0:50:0,117,1169:..	0/0:25:25,0:50:0,81,809:..	0/0:18:18,0:50:0,84,839:..	0/0:19:19,0:50:0,69,689:..	0/0:25:25,0:48:0,102,1019:..	0/1:28:11,17:42:42,0,53:..	0/0:19:19,0:48:0,69,689:..	0/0:21:21,0:50:0,75,749:..	0/0:21:21,0:50:0,135,1349:..	0/0:25:25,0:48:0,75,749:..	0/0:20:20,0:50:0,90,899:..	0/0:16:16,0:48:0,57,569:..	0/0:18:18,0:50:0,60,599:..	0/0:18:18,0:50:0,60,599:..	seq2
chr5	134366197	chr5_134366197_G_A	G	A	40	AF=0.013889;AQ=40	GT:DP:AD:GQ:PL:RNC	0/0:23:23,0:39:0,39,629:..	0/0:29:29,0:50:0,99,989:..	0/0:23:23,0:48:0,75,749:..	0/0:22:22,0:48:0,75,749:..	0/0:23:23,0:48:0,90,899:..	0/0:16:16,0:48:0,51,509:..	0/0:20:20,0:48:0,102,1019:..	0/0:20:20,0:50:0,60,599:..	0/0:25:25,0:48:0,96,959:..	0/0:20:20,0:48:0,93,929:..	0/1:33:18,15:40:40,0,53:..	0/0:24:24,0:48:0,51,749:..	0/0:19:19,0:48:0,111,1109:..	0/0:16:16,0:48:0,48,479:..	0/0:24:24,0:48:0,72,719:..	0/0:33:33,0:39:0,39,869:..	0/0:28:28,0:50:0,132,1319:..	0/0:24:24,0:42:0,42,659:..	0/0:17:17,0:50:0,57,569:..	0/0:19:19,0:48:0,84,839:..	0/0:23:23,0:39:0,39,629:..	0/0:28:28,0:50:0,96,959:..	0/0:24:24,0:50:0,105,1049:..	0/0:25:21,4:35:0,35,49:..	0/0:20:20,0:50:0,81,809:..	0/0:18:18,0:50:0,60,599:..	0/0:23:23,0:48:0,180,1799:..	0/0:23:23,0:50:0,90,899:..	0/0:20:20,0:50:0,60,599:..	0/0:21:21,0:33:0,33,569:..	0/0:26:26,0:50:0,99,989:..	0/0:23:23,0:50:0,72,719:..	0/0:21:21,0:33:0,33,569:..	0/0:24:24,0:50:0,72,719:..	0/0:35:35,0:45:0,45,929:..	0/0:24:24,0:48:0,108,1079:..	seq2
chr5	136157187	chr5_136157187_C_T	C	T	37	AF=0.013889;AQ=37	GT:DP:AD:GQ:PL:RNC	0/0:16:16,0:48:0,51,509:..	0/0:23:23,0:48:0,99,989:..	0/0:24:24,0:50:0,93,929:..	0/0:23:23,0:48:0,57,809:..	0/0:22:22,0:50:0,69,689:..	0/0:23:23,0:50:0,72,719:..	0/0:24:24,0:50:0,99,989:..	0/0:16:16,0:48:0,63,629:..	0/0:16:16,0:48:0,63,629:..	0/0:21:21,0:48:0,72,719:..	0/0:22:22,0:50:0,66,659:..	0/1:34:21,13:37:37,0,53:..	0/0:20:20,0:50:0,63,629:..	0/0:21:21,0:50:0,63,629:..	0/0:22:22,0:50:0,72,719:..	0/0:25:25,0:50:0,75,749:..	0/0:24:24,0:50:0,69,929:..	0/0:23:23,0:48:0,72,719:..	0/0:23:23,0:50:0,72,719:..	0/0:19:19,0:50:0,69,689:..	0/0:22:22,0:50:0,66,659:..	0/0:25:25,0:50:0,126,1259:..	0/0:21:21,0:50:0,63,629:..	0/0:24:24,0:50:0,114,1139:..	0/0:24:24,0:48:0,96,959:..	0/0:23:23,0:48:0,81,809:..	0/0:23:23,0:50:0,81,809:..	0/0:22:22,0:50:0,75,749:..	0/0:20:20,0:48:0,120,1199:..	0/0:22:22,0:50:0,72,719:..	0/0:22:22,0:50:0,75,749:..	0/0:19:19,0:50:0,66,659:..	0/0:25:25,0:50:0,111,1109:..	0/0:22:22,0:48:0,81,1049:..	0/0:22:22,0:50:0,66,659:..	0/0:22:22,0:50:0,72,719:..	seq2
chr5	138778633	chr5_138778633_G_A	G	A	44	AF=0.013889;AQ=44	GT:DP:AD:GQ:PL:RNC	0/0:23:23,0:48:0,102,1019:..	0/0:29:29,0:50:0,93,929:..	0/0:31:31,0:50:0,99,989:..	0/0:23:23,0:50:0,105,1049:..	0/0:28:28,0:50:0,99,989:..	0/0:18:18,0:50:0,72,719:..	0/0:24:24,0:50:0,60,839:..	0/0:23:23,0:50:0,69,689:..	0/0:22:22,0:48:0,87,869:..	0/0:31:31,0:50:0,111,1109:..	0/0:25:25,0:50:0,90,899:..	0/0:29:29,0:50:0,90,899:..	0/0:26:26,0:48:0,48,719:..	0/0:19:19,0:50:0,93,929:..	0/0:26:26,0:50:0,102,1019:..	0/0:23:23,0:50:0,75,749:..	0/0:22:22,0:48:0,54,1019:..	0/0:23:23,0:48:0,75,749:..	0/0:17:17,0:50:0,102,1019:..	0/0:30:30,0:50:0,105,1049:..	0/0:33:33,0:50:0,105,1049:..	0/0:31:31,0:48:0,108,1079:..	0/0:25:25,0:50:0,84,839:..	0/0:26:26,0:50:0,51,989:..	0/0:23:23,0:48:0,90,899:..	0/0:23:23,0:50:0,72,719:..	0/1:28:13,15:44:44,0,52:..	0/0:29:29,0:50:0,66,899:..	0/0:26:26,0:50:0,87,869:..	0/0:25:25,0:50:0,75,749:..	0/0:24:24,0:48:0,78,779:..	0/0:25:25,0:50:0,105,1049:..	0/0:23:23,0:48:0,69,689:..	0/0:18:18,0:50:0,60,599:..	0/0:22:22,0:50:0,66,659:..	0/0:27:27,0:50:0,54,1259:..	seq2
chr5	139202723	chr5_139202723_C_T	C	T	48	AF=0.013889;AQ=48	GT:DP:AD:GQ:PL:RNC	0/0:22:22,0:48:0,66,659:..	0/0:20:20,0:50:0,63,629:..	0/0:18:18,0:48:0,78,779:..	0/0:20:20,0:50:0,75,749:..	0/0:17:17,0:50:0,66,659:..	0/0:24:24,0:50:0,78,779:..	0/0:21:21,0:50:0,69,689:..	0/0:24:24,0:50:0,75,749:..	0/0:16:16,0:48:0,48,479:..	0/0:27:27,0:50:0,141,1409:..	0/0:19:19,0:50:0,66,659:..	0/0:16:16,0:48:0,63,629:..	0/0:24:24,0:50:0,90,899:..	0/0:17:17,0:50:0,99,989:..	0/0:16:16,0:48:0,51,509:..	0/0:21:21,0:50:0,87,869:..	0/0:22:22,0:50:0,69,689:..	0/0:18:18,0:50:0,63,629:..	0/1:43:20,23:48:48,0,58:..	0/0:20:20,0:50:0,60,599:..	0/0:23:23,0:50:0,96,959:..	0/0:25:25,0:50:0,114,1139:..	0/0:19:19,0:48:0,60,599:..	0/0:25:25,0:50:0,129,1289:..	0/0:24:24,0:50:0,90,899:..	0/0:21:21,0:50:0,66,659:..	0/0:23:23,0:48:0,72,719:..	0/0:24:24,0:50:0,72,719:..	0/0:21:21,0:48:0,63,629:..	0/0:19:19,0:48:0,75,749:..	0/0:22:22,0:48:0,69,689:..	0/0:21:21,0:48:0,75,749:..	0/0:21:21,0:50:0,69,689:..	0/0:20:20,0:50:0,72,719:..	0/0:16:16,0:48:0,66,659:..	0/0:22:22,0:50:0,66,659:..	seq2
chr5	139830282	chr5_139830282_C_T	C	T	30	AF=0.013889;AQ=30	GT:DP:AD:GQ:PL:RNC	0/0:25:25,0:48:0,78,779:..	0/0:16:16,0:48:0,51,509:..	0/0:24:24,0:48:0,84,839:..	0/0:23:23,0:50:0,75,749:..	0/0:21:21,0:50:0,72,719:..	0/1:39:25,14:31:30,0,50:..	0/0:21:21,0:48:0,57,809:..	0/0:21:21,0:48:0,84,839:..	0/0:24:24,0:50:0,93,929:..	0/0:19:19,0:48:0,81,809:..	0/0:18:18,0:50:0,66,659:..	0/0:21:21,0:50:0,63,629:..	0/0:23:23,0:48:0,96,959:..	0/0:23:23,0:50:0,72,719:..	0/0:26:26,0:50:0,81,809:..	0/0:20:20,0:48:0,69,689:..	0/0:29:29,0:50:0,60,839:..	0/0:21:21,0:50:0,99,989:..	0/0:24:24,0:48:0,75,749:..	0/0:21:21,0:48:0,81,809:..	0/0:23:23,0:50:0,93,929:..	0/0:24:24,0:50:0,96,959:..	0/0:23:23,0:50:0,69,689:..	0/0:21:21,0:50:0,63,629:..	0/0:16:16,0:48:0,72,719:..	0/0:18:18,0:50:0,105,1049:..	0/0:22:22,0:48:0,69,929:..	0/0:22:22,0:48:0,75,749:..	0/0:28:28,0:50:0,93,929:..	0/0:22:22,0:50:0,72,719:..	0/0:24:24,0:48:0,84,839:..	0/0:22:22,0:50:0,75,749:..	0/0:25:25,0:50:0,75,749:..	0/0:20:20,0:48:0,78,779:..	0/0:16:16,0:48:0,48,479:..	0/0:25:25,0:50:0,78,779:..	seq2
chr5	143552392	chr5_143552392_T_G	T	G	40	AF=0.013889;AQ=40	GT:DP:AD:GQ:PL:RNC	0/0:17:17,0:48:0,111,1109:..	0/0:20:20,0:50:0,66,659:..	0/0:26:26,0:48:0,87,869:..	0/0:20:20,0:48:0,102,1019:..	0/0:22:22,0:50:0,66,659:..	0/0:22:22,0:50:0,72,719:..	0/0:24:24,0:50:0,87,869:..	0/0:16:16,0:48:0,60,599:..	0/0:18:18,0:50:0,63,629:..	0/0:28:28,0:50:0,108,1079:..	0/0:20:20,0:50:0,60,599:..	0/0:17:17,0:50:0,75,749:..	0/0:24:24,0:50:0,75,749:..	0/0:17:17,0:50:0,69,689:..	0/0:18:18,0:50:0,54,539:..	0/0:19:19,0:48:0,63,629:..	0/0:25:25,0:48:0,75,749:..	0/0:16:16,0:48:0,57,569:..	0/0:22:22,0:36:0,36,599:..	0/0:22:22,0:48:0,75,749:..	0/0:25:25,0:50:0,75,749:..	0/0:21:21,0:50:0,99,989:..	0/0:23:23,0:50:0,75,749:..	0/0:19:19,0:50:0,108,1079:..	0/0:21:21,0:50:0,63,629:..	0/0:25:25,0:50:0,102,1019:..	0/1:21:8,13:40:40,0,52:..	0/0:16:16,0:48:0,51,509:..	0/0:16:16,0:48:0,48,479:..	0/0:18:18,0:48:0,57,569:..	0/0:22:22,0:48:0,66,659:..	0/0:18:18,0:48:0,66,659:..	0/0:20:20,0:48:0,75,749:..	0/0:25:25,0:48:0,75,749:..	0/0:18:18,0:50:0,69,689:..	0/0:20:20,0:50:0,72,719:..	seq2
chr6	13407683	chr6_13407683_T_C	T	C	32	AF=0.013889;AQ=32	GT:DP:AD:GQ:PL:RNC	0/0:24:24,0:48:0,75,749:..	0/0:17:17,0:50:0,60,599:..	0/0:23:23,0:48:0,75,749:..	0/0:25:25,0:50:0,99,989:..	0/0:23:23,0:50:0,87,869:..	0/0:23:23,0:48:0,102,1019:..	0/0:20:20,0:50:0,90,899:..	0/0:20:20,0:48:0,93,929:..	0/0:16:16,0:48:0,48,479:..	0/0:31:31,0:50:0,96,959:..	0/0:22:22,0:48:0,72,719:..	0/0:22:22,0:48:0,75,749:..	0/0:22:22,0:50:0,69,689:..	0/0:25:25,0:50:0,114,1139:..	0/0:24:24,0:50:0,72,719:..	0/0:22:22,0:48:0,72,719:..	0/0:20:20,0:50:0,63,629:..	0/0:25:25,0:48:0,93,929:..	0/0:20:20,0:50:0,72,719:..	0/1:33:20,13:33:32,0,51:..	0/0:23:23,0:48:0,69,689:..	0/0:24:24,0:50:0,132,1319:..	0/0:20:20,0:50:0,72,719:..	0/0:22:22,0:48:0,105,1049:..	0/0:23:23,0:48:0,75,749:..	0/0:24:24,0:50:0,75,749:..	0/0:24:24,0:48:0,72,719:..	0/0:19:19,0:50:0,69,689:..	0/0:21:21,0:50:0,72,719:..	0/0:21:21,0:48:0,72,719:..	0/0:16:16,0:48:0,60,599:..	0/0:21:21,0:50:0,75,749:..	0/0:18:18,0:50:0,63,629:..	0/0:20:20,0:48:0,78,779:..	0/0:22:22,0:48:0,75,989:..	0/0:24:24,0:50:0,102,1019:..	seq2
chr6	15079018	chr6_15079018_A_G	A	G	27	AF=0.013889;AQ=27	GT:DP:AD:GQ:PL:RNC	0/0:23:23,0:50:0,87,869:..	0/0:18:18,0:50:0,54,539:..	0/0:23:23,0:48:0,78,779:..	0/0:16:16,0:48:0,48,479:..	0/0:24:24,0:50:0,90,899:..	0/0:25:25,0:50:0,78,779:..	0/0:16:16,0:48:0,51,509:..	0/0:24:24,0:50:0,84,839:..	0/0:23:23,0:50:0,78,779:..	0/0:23:23,0:50:0,108,1079:..	0/1:32:22,10:28:27,0,50:..	0/0:22:22,0:50:0,96,959:..	0/0:28:28,0:50:0,90,899:..	0/0:21:21,0:48:0,120,1199:..	0/0:23:23,0:50:0,69,689:..	0/0:23:23,0:48:0,78,779:..	0/0:22:22,0:50:0,126,1259:..	0/0:16:16,0:48:0,96,959:..	0/0:21:21,0:48:0,69,689:..	0/0:24:24,0:50:0,117,1169:..	0/0:30:30,0:50:0,93,929:..	0/0:29:29,0:50:0,99,989:..	0/0:21:21,0:48:0,117,1169:..	0/0:22:22,0:50:0,90,899:..	0/0:19:19,0:50:0,63,629:..	0/0:23:23,0:50:0,87,869:..	0/0:20:20,0:50:0,105,1049:..	0/0:21:21,0:50:0,66,659:..	0/0:26:26,0:48:0,81,809:..	0/0:19:19,0:48:0,111,1109:..	0/0:22:22,0:50:0,72,719:..	0/0:26:26,0:48:0,84,839:..	0/0:19:19,0:50:0,57,569:..	0/0:22:22,0:50:0,87,869:..	0/0:24:24,0:48:0,75,749:..	0/0:20:20,0:50:0,66,659:..	seq2
chr6	18077763	chr6_18077763_T_C	T	C	34	AF=0.013889;AQ=34	GT:DP:AD:GQ:PL:RNC	0/0:26:26,0:48:0,99,989:..	0/0:20:20,0:48:0,60,599:..	0/0:18:18,0:50:0,54,539:..	0/0:19:19,0:48:0,72,719:..	0/0:17:17,0:50:0,51,509:..	0/0:16:16,0:48:0,51,509:..	0/0:25:25,0:48:0,75,749:..	0/0:23:23,0:48:0,69,689:..	0/0:16:16,0:48:0,54,539:..	0/0:24:24,0:50:0,57,809:..	0/0:22:22,0:50:0,72,719:..	0/0:26:26,0:50:0,102,1019:..	0/0:18:18,0:48:0,69,689:..	0/0:22:22,0:50:0,66,659:..	0/0:23:23,0:50:0,75,749:..	0/0:23:23,0:48:0,72,719:..	0/0:24:24,0:50:0,72,719:..	0/0:16:16,0:48:0,48,479:..	0/0:23:23,0:50:0,72,719:..	0/0:23:23,0:50:0,75,749:..	0/0:22:22,0:48:0,81,809:..	0/0:27:27,0:50:0,81,809:..	0/0:18:18,0:50:0,54,539:..	0/0:24:24,0:48:0,75,749:..	0/0:20:20,0:50:0,66,659:..	0/0:20:20,0:48:0,72,719:..	0/0:19:19,0:50:0,81,809:..	0/0:18:18,0:50:0,57,569:..	0/0:16:16,0:48:0,54,539:..	0/0:16:16,0:48:0,54,539:..	0/0:24:24,0:50:0,75,749:..	0/0:16:16,0:48:0,48,479:..	0/0:16:16,0:48:0,48,479:..	0/0:22:22,0:48:0,66,659:..	0/1:25:13,12:34:34,0,51:..	0/0:23:23,0:50:0,75,749:..	seq2
chr6	21211650	chr6_21211650_T_G	T	G	41	AF=0.013889;AQ=41	GT:DP:AD:GQ:PL:RNC	0/0:16:16,0:48:0,48,479:..	0/0:16:16,0:48:0,48,479:..	0/0:25:25,0:50:0,75,749:..	0/0:16:16,0:48:0,48,479:..	0/0:24:24,0:50:0,75,749:..	0/0:21:21,0:50:0,105,1049:..	0/0:22:22,0:50:0,87,869:..	0/0:23:23,0:48:0,75,749:..	0/0:17:17,0:50:0,51,509:..	0/0:20:20,0:50:0,60,599:..	0/0:18:18,0:50:0,72,719:..	0/0:22:22,0:48:0,72,719:..	0/0:23:23,0:50:0,75,749:..	0/0:16:16,0:48:0,84,839:..	0/0:22:22,0:48:0,69,689:..	0/0:19:19,0:48:0,66,659:..	0/0:22:22,0:48:0,66,659:..	0/0:16:16,0:48:0,75,749:..	0/1:23:10,13:41:41,0,49:..	0/0:22:22,0:48:0,66,659:..	0/0:19:19,0:48:0,78,779:..	0/0:22:22,0:50:0,75,749:..	0/0:22:22,0:48:0,75,749:..	0/0:22:22,0:50:0,66,659:..	0/0:16:16,0:48:0,48,479:..	0/0:19:19,0:50:0,72,719:..	0/0:21:21,0:50:0,72,719:..	0/0:19:19,0:50:0,66,659:..	0/0:22:22,0:48:0,72,719:..	0/0:14:14,0:42:0,42,419:..	0/0:24:24,0:48:0,81,809:..	0/0:23:23,0:48:0,78,779:..	0/0:18:18,0:50:0,72,719:..	0/0:21:21,0:50:0,75,749:..	0/0:21:21,0:48:0,93,929:..	0/0:18:18,0:50:0,60,599:..	seq2
chr6	24615515	chr6_24615515_T_A	T	A	39	AF=0.013889;AQ=39	GT:DP:AD:GQ:PL:RNC	0/0:22:22,0:48:0,75,749:..	0/0:20:20,0:50:0,81,809:..	0/0:20:20,0:48:0,66,659:..	0/0:19:19,0:50:0,63,629:..	0/0:24:24,0:50:0,72,719:..	0/0:25:25,0:50:0,75,749:..	0/0:16:16,0:48:0,66,659:..	0/0:21:21,0:50:0,66,659:..	0/0:25:25,0:50:0,75,749:..	0/0:21:21,0:50:0,66,659:..	0/0:16:16,0:48:0,69,689:..	0/0:21:21,0:50:0,75,749:..	0/0:21:21,0:50:0,69,689:..	0/0:27:27,0:50:0,90,899:..	0/0:21:21,0:50:0,72,719:..	0/0:18:18,0:50:0,57,569:..	0/0:23:23,0:50:0,75,749:..	0/0:21:21,0:50:0,84,839:..	0/0:19:19,0:48:0,66,899:..	0/0:22:22,0:48:0,66,659:..	0/0:22:22,0:48:0,72,719:..	0/0:25:25,0:50:0,78,779:..	0/0:24:24,0:48:0,87,869:..	0/0:28:28,0:50:0,111,1109:..	0/0:21:21,0:48:0,75,749:..	0/0:21:21,0:50:0,66,659:..	0/0:25:25,0:50:0,111,1109:..	0/0:22:22,0:48:0,102,1019:..	0/0:21:21,0:48:0,66,659:..	0/0:20:20,0:50:0,69,689:..	0/0:18:18,0:48:0,75,749:..	0/0:22:22,0:50:0,66,659:..	0/0:22:22,0:50:0,75,749:..	0/0:26:26,0:50:0,78,779:..	0/1:31:17,14:40:39,0,56:..	0/0:23:23,0:48:0,75,749:..	seq2
chr6	25838376	chr6_25838376_G_A	G	A	41	AF=0.013889;AQ=41	GT:DP:AD:GQ:PL:RNC	0/0:21:21,0:48:0,66,659:..	0/0:21:21,0:50:0,63,629:..	0/0:23:23,0:48:0,57,809:..	0/0:22:22,0:50:0,69,689:..	0/0:22:22,0:48:0,99,989:..	0/0:21:21,0:48:0,81,809:..	0/0:21:21,0:50:0,66,659:..	0/0:21:21,0:48:0,72,719:..	0/0:21:21,0:50:0,66,659:..	0/0:21:21,0:48:0,78,779:..	0/0:19:19,0:50:0,81,809:..	0/0:21:21,0:50:0,66,659:..	0/0:25:25,0:50:0,78,779:..	0/0:22:22,0:50:0,126,1259:..	0/0:16:16,0:48:0,69,689:..	0/0:25:25,0:45:0,45,689:..	0/0:22:22,0:48:0,72,719:..	0/0:25:25,0:50:0,78,779:..	0/0:24:24,0:50:0,75,749:..	0/0:26:26,0:50:0,84,839:..	0/0:17:17,0:50:0,120,1199:..	0/0:27:27,0:50:0,90,899:..	0/0:24:24,0:48:0,72,719:..	0/0:31:31,0:50:0,99,1229:..	0/0:17:17,0:48:0,54,539:..	0/0:12:12,0:36:0,36,359:..	0/0:22:22,0:48:0,69,689:..	0/0:21:21,0:33:0,33,569:..	0/1:31:17,14:41:41,0,55:..	0/0:18:18,0:50:0,78,779:..	0/0:27:27,0:48:0,105,1049:..	0/0:16:16,0:48:0,48,479:..	0/0:18:18,0:50:0,57,569:..	0/0:18:18,0:48:0,84,839:..	0/0:25:25,0:48:0,108,1079:..	0/0:24:24,0:50:0,72,719:..	seq2
chr6	26240362	chr6_26240362_G_A	G	A	14	AF=0.013889;AQ=14	GT:DP:AD:GQ:PL:RNC	0/0:23:23,0:48:0,69,689:..	0/0:21:21,0:50:0,84,839:..	0/0:22:22,0:48:0,75,749:..	0/0:20:20,0:48:0,60,599:..	0/0:22:22,0:50:0,69,689:..	0/0:24:24,0:50:0,150,1499:..	0/0:27:27,0:50:0,84,839:..	0/0:25:25,0:50:0,75,749:..	0/0:16:16,0:48:0,63,629:..	0/0:24:24,0:50:0,96,959:..	0/0:25:25,0:50:0,96,959:..	0/0:25:25,0:50:0,75,749:..	0/0:24:24,0:50:0,72,719:..	0/0:21:21,0:50:0,126,1259:..	0/0:24:24,0:50:0,102,1019:..	0/0:19:19,0:50:0,90,899:..	0/0:25:25,0:50:0,96,959:..	0/0:23:23,0:50:0,72,719:..	0/0:22:22,0:50:0,81,809:..	0/0:26:26,0:50:0,87,869:..	0/0:21:21,0:50:0,72,719:..	0/0:25:25,0:48:0,117,1169:..	0/0:19:19,0:50:0,60,599:..	0/0:24:24,0:48:0,87,869:..	0/0:20:20,0:50:0,114,1139:..	0/0:20:20,0:50:0,66,659:..	0/0:25:25,0:50:0,90,899:..	0/1:26:21,5:14:14,0,42:..	0/0:19:19,0:48:0,108,1079:..	0/0:16:16,0:48:0,48,479:..	0/0:24:24,0:50:0,84,839:..	0/0:16:16,0:48:0,51,509:..	0/0:24:24,0:50:0,78,779:..	0/0:16:16,0:48:0,81,809:..	0/0:16:16,0:48:0,48,479:..	0/0:20:20,0:50:0,75,749:..	seq2
chr6	33780128	chr6_33780128_G_A	G	A	18	AF=0.013889;AQ=18	GT:DP:AD:GQ:PL:RNC	0/0:21:21,0:50:0,66,659:..	0/0:17:17,0:50:0,54,539:..	0/0:16:16,0:48:0,75,749:..	0/0:24:24,0:48:0,75,749:..	0/0:27:27,0:50:0,81,809:..	0/0:24:24,0:48:0,105,1049:..	0/0:18:18,0:50:0,60,599:..	0/0:20:20,0:50:0,81,809:..	0/0:12:12,0:36:0,36,359:..	0/0:26:26,0:50:0,90,899:..	0/0:20:20,0:50:0,60,599:..	0/0:17:17,0:50:0,66,659:..	0/0:25:25,0:48:0,75,749:..	0/0:23:23,0:50:0,102,1019:..	0/0:25:25,0:50:0,99,989:..	0/0:28:28,0:50:0,93,929:..	0/0:23:23,0:50:0,78,779:..	0/0:22:22,0:50:0,93,929:..	0/0:24:24,0:42:0,42,659:..	0/0:32:32,0:50:0,102,1019:..	0/0:24:24,0:42:0,42,659:..	0/0:21:21,0:50:0,63,629:..	0/1:24:19,5:19:18,0,46:..	0/0:25:25,0:50:0,93,929:..	0/0:20:20,0:50:0,93,929:..	0/0:22:22,0:50:0,87,869:..	0/0:23:23,0:50:0,102,1019:..	0/0:23:23,0:48:0,72,719:..	0/0:24:24,0:50:0,78,779:..	0/0:22:22,0:50:0,66,659:..	0/0:18:18,0:50:0,66,659:..	0/0:19:19,0:48:0,66,659:..	0/0:25:25,0:50:0,90,899:..	0/0:22:22,0:50:0,78,779:..	0/0:22:22,0:50:0,66,659:..	0/0:23:23,0:50:0,75,749:..	seq2
chr6	36481907	chr6_36481907_T_A	T	A	45	AF=0.013889;AQ=45	GT:DP:AD:GQ:PL:RNC	0/0:26:26,0:50:0,84,839:..	0/0:24:24,0:50:0,75,749:..	0/0:23:23,0:48:0,72,719:..	0/0:25:25,0:50:0,111,1109:..	0/0:23:23,0:50:0,102,1019:..	0/0:22:22,0:48:0,117,1169:..	0/0:21:21,0:50:0,75,749:..	0/0:17:17,0:50:0,51,509:..	0/0:20:20,0:50:0,78,779:..	0/0:22:22,0:48:0,69,689:..	0/1:36:16,20:44:45,0,53:..	0/0:25:25,0:50:0,75,749:..	0/0:22:22,0:48:0,78,779:..	0/0:26:26,0:48:0,66,899:..	0/0:24:24,0:42:0,42,659:..	0/0:16:16,0:48:0,48,479:..	0/0:24:24,0:48:0,72,719:..	0/0:22:22,0:50:0,72,719:..	0/0:20:20,0:50:0,72,719:..	0/0:30:30,0:50:0,60,839:..	0/0:16:16,0:48:0,48,479:..	0/0:26:26,0:50:0,120,1199:..	0/0:18:18,0:50:0,60,599:..	0/0:22:22,0:48:0,72,719:..	0/0:23:23,0:48:0,69,689:..	0/0:29:29,0:50:0,90,899:..	0/0:28:28,0:50:0,87,869:..	0/0:20:20,0:48:0,60,599:..	0/0:23:23,0:48:0,90,899:..	0/0:22:22,0:48:0,69,689:..	0/0:25:25,0:50:0,75,749:..	0/0:26:26,0:48:0,48,719:..	0/0:23:23,0:50:0,69,689:..	0/0:17:17,0:50:0,75,749:..	0/0:23:23,0:48:0,96,959:..	0/0:19:19,0:50:0,60,599:..	seq2
chr6	42006930	chr6_42006930_A_T	A	T	15	AF=0.013889;AQ=15	GT:DP:AD:GQ:PL:RNC	0/0:21:21,0:50:0,66,659:..	0/0:21:21,0:50:0,66,659:..	0/0:24:24,0:48:0,75,749:..	0/0:16:16,0:48:0,69,689:..	0/0:20:20,0:50:0,72,719:..	0/0:22:22,0:50:0,72,719:..	0/0:17:17,0:48:0,51,509:..	0/0:24:24,0:50:0,72,719:..	0/0:21:21,0:48:0,66,659:..	0/0:24:24,0:50:0,96,959:..	0/0:23:23,0:50:0,75,749:..	0/0:17:17,0:48:0,66,659:..	0/0:22:22,0:50:0,78,779:..	0/0:24:24,0:50:0,72,719:..	0/0:20:20,0:48:0,72,719:..	0/0:22:22,0:50:0,66,659:..	0/0:24:24,0:50:0,72,719:..	0/0:32:32,0:50:0,99,989:..	0/0:19:19,0:50:0,66,659:..	0/0:28:28,0:50:0,90,899:..	0/0:22:22,0:48:0,69,689:..	0/0:34:34,0:50:0,108,1079:..	0/1:16:13,3:15:15,0,42:..	0/0:23:23,0:50:0,78,779:..	0/0:22:22,0:48:0,75,749:..	0/0:23:23,0:50:0,72,719:..	0/0:22:22,0:48:0,72,719:..	0/0:24:24,0:50:0,75,749:..	0/0:26:26,0:50:0,90,899:..	0/0:26:26,0:50:0,78,779:..	0/0:28:28,0:50:0,102,1019:..	0/0:21:21,0:50:0,75,749:..	0/0:20:20,0:50:0,84,839:..	0/0:19:19,0:50:0,81,809:..	0/0:16:16,0:48:0,48,479:..	0/0:19:19,0:50:0,60,599:..	seq2
chr6	56774818	chr6_56774818_G_C	G	C	39	AF=0.013889;AQ=39	GT:DP:AD:GQ:PL:RNC	0/0:26:26,0:50:0,78,779:..	0/0:16:16,0:48:0,48,479:..	0/0:24:24,0:50:0,72,719:..	0/0:24:24,0:50:0,72,719:..	0/1:35:20,15:39:39,0,52:..	0/0:25:25,0:50:0,114,1139:..	0/0:25:25,0:50:0,105,1049:..	0/0:18:18,0:48:0,57,809:..	0/0:19:19,0:50:0,81,809:..	0/0:26:26,0:50:0,111,1109:..	0/0:24:24,0:50:0,72,719:..	0/0:28:28,0:50:0,66,899:..	0/0:27:27,0:50:0,90,899:..	0/0:16:16,0:48:0,57,569:..	0/0:25:25,0:48:0,81,809:..	0/0:22:22,0:50:0,129,1289:..	0/0:23:23,0:50:0,84,839:..	0/0:21:21,0:48:0,78,779:..	0/0:20:20,0:50:0,60,599:..	0/0:20:20,0:50:0,72,719:..	0/0:28:28,0:50:0,84,839:..	0/0:38:38,0:50:0,135,1349:..	0/0:17:17,0:48:0,75,749:..	0/0:23:23,0:50:0,69,689:..	0/0:24:24,0:48:0,87,869:..	0/0:29:29,0:50:0,87,869:..	0/0:29:29,0:50:0,90,899:..	0/0:29:29,0:50:0,114,1139:..	0/0:24:24,0:50:0,84,839:..	0/0:28:28,0:50:0,93,929:..	0/0:20:20,0:50:0,60,599:..	0/0:26:26,0:50:0,69,929:..	0/0:23:23,0:50:0,75,749:..	0/0:18:18,0:50:0,57,569:..	0/0:20:20,0:50:0,60,599:..	0/0:25:25,0:50:0,75,749:..	seq2
chr6	58427696	chr6_58427696_C_T	C	T	35	AF=0.013889;AQ=35	GT:DP:AD:GQ:PL:RNC	0/0:25:25,0:50:0,75,749:..	0/0:18:18,0:50:0,69,689:..	0/0:18:18,0:50:0,57,569:..	0/0:18:18,0:50:0,72,719:..	0/0:24:24,0:50:0,75,749:..	0/1:20:11,9:35:35,0,53:..	0/0:21:21,0:50:0,66,659:..	0/0:16:16,0:48:0,48,479:..	0/0:23:23,0:50:0,75,749:..	0/0:25:25,0:50:0,99,989:..	0/0:21:21,0:50:0,66,659:..	0/0:21:21,0:33:0,33,569:..	0/0:16:16,0:48:0,63,629:..	0/0:24:24,0:50:0,78,779:..	0/0:24:24,0:50:0,93,929:..	0/0:16:16,0:48:0,72,719:..	0/0:21:21,0:50:0,63,629:..	0/0:16:16,0:48:0,63,629:..	0/0:20:20,0:50:0,69,689:..	0/0:21:21,0:48:0,63,629:..	0/0:21:21,0:50:0,69,689:..	0/0:23:23,0:48:0,72,719:..	0/0:25:25,0:48:0,75,749:..	0/0:27:27,0:48:0,99,989:..	0/0:16:16,0:48:0,48,479:..	0/0:20:20,0:48:0,90,899:..	0/0:25:25,0:48:0,75,749:..	0/0:20:20,0:50:0,60,599:..	0/0:17:17,0:48:0,72,719:..	0/0:16:16,0:48:0,57,569:..	0/0:20:20,0:50:0,69,689:..	0/0:20:20,0:50:0,75,749:..	0/0:22:22,0:50:0,72,719:..	0/0:19:19,0:50:0,99,989:..	0/0:22:22,0:50:0,66,659:..	0/0:16:16,0:48:0,57,569:..	seq2
chr6	59484740	chr6_59484740_T_A	T	A	50	AF=0.013889;AQ=50	GT:DP:AD:GQ:PL:RNC	0/0:16:16,0:48:0,48,479:..	0/0:17:17,0:48:0,54,539:..	0/0:22:22,0:50:0,72,719:..	0/0:17:17,0:48:0,51,509:..	0/0:22:22,0:48:0,72,719:..	0/0:22:22,0:50:0,69,689:..	0/0:19:19,0:50:0,57,569:..	0/0:16:16,0:48:0,63,629:..	0/0:16:16,0:48:0,48,479:..	0/0:22:22,0:50:0,72,719:..	0/0:19:19,0:50:0,66,659:..	0/0:22:22,0:50:0,87,869:..	0/0:17:17,0:50:0,54,539:..	0/0:19:19,0:48:0,69,689:..	0/0:26:26,0:50:0,93,929:..	0/0:19:19,0:48:0,72,719:..	0/0:24:24,0:48:0,81,809:..	0/0:16:16,0:48:0,48,479:..	0/0:19:19,0:50:0,60,599:..	0/0:23:23,0:50:0,69,689:..	0/0:20:20,0:50:0,63,629:..	0/1:38:13,25:47:50,0,49:..	0/0:21:21,0:48:0,96,959:..	0/0:25:25,0:48:0,75,749:..	0/0:16:16,0:48:0,69,689:..	0/0:23:23,0:50:0,75,749:..	0/0:26:26,0:50:0,105,1049:..	0/0:16:16,0:48:0,60,599:..	0/0:18:18,0:48:0,93,929:..	0/0:20:20,0:50:0,66,659:..	0/0:25:25,0:50:0,81,809:..	0/0:25:25,0:50:0,75,749:..	0/0:22:22,0:48:0,75,749:..	0/0:23:23,0:48:0,75,749:..	0/0:17:17,0:50:0,66,659:..	0/0:24:24,0:48:0,72,719:..	seq2
chr6	67444980	chr6_67444980_C_T	C	T	37	AF=0.013889;AQ=37	GT:DP:AD:GQ:PL:RNC	0/0:19:19,0:50:0,60,599:..	0/0:25:25,0:50:0,75,749:..	0/0:24:24,0:48:0,78,779:..	0/0:22:22,0:48:0,66,659:..	0/0:30:30,0:50:0,93,929:..	0/0:25:25,0:50:0,87,869:..	0/0:25:25,0:50:0,93,929:..	0/0:32:32,0:50:0,111,1109:..	0/0:18:18,0:50:0,69,689:..	0/0:18:18,0:48:0,72,719:..	0/0:21:21,0:50:0,69,689:..	0/0:27:27,0:50:0,93,929:..	0/0:25:25,0:48:0,93,929:..	0/0:25:25,0:50:0,57,809:..	0/0:24:24,0:50:0,105,1049:..	0/0:23:23,0:48:0,69,689:..	0/0:26:26,0:50:0,81,809:..	0/0:22:22,0:50:0,69,689:..	0/0:17:17,0:50:0,51,509:..	0/0:33:33,0:50:0,99,989:..	0/0:20:20,0:48:0,48,719:..	0/0:22:22,0:50:0,66,659:..	0/0:22:22,0:50:0,87,869:..	0/0:24:24,0:50:0,72,719:..	0/0:23:23,0:50:0,93,929:..	0/1:26:15,11:37:37,0,51:..	0/0:30:30,0:50:0,90,899:..	0/0:16:16,0:48:0,48,479:..	0/0:24:24,0:50:0,87,869:..	0/0:19:19,0:50:0,60,599:..	0/0:25:25,0:48:0,75,749:..	0/0:14:14,0:12:0,12,359:..	0/0:24:24,0:50:0,90,899:..	0/0:26:26,0:50:0,90,899:..	0/0:34:34,0:50:0,123,1229:..	0/0:28:28,0:50:0,96,959:..	seq2
chr6	75449858	chr6_75449858_G_T	G	T	45	AF=0.013889;AQ=45	GT:DP:AD:GQ:PL:RNC	0/0:24:24,0:50:0,105,1049:..	0/0:16:16,0:48:0,48,479:..	0/0:24:24,0:50:0,72,719:..	0/0:22:22,0:50:0,69,689:..	0/0:16:16,0:48:0,57,569:..	0/0:18:18,0:50:0,72,719:..	0/1:24:9,15:45:45,0,54:..	0/0:17:17,0:50:0,66,659:..	0/0:24:24,0:48:0,75,749:..	0/0:21:21,0:48:0,72,719:..	0/0:27:27,0:50:0,90,899:..	0/0:22:22,0:50:0,69,689:..	0/0:21:21,0:48:0,66,659:..	0/0:23:23,0:50:0,102,1019:..	0/0:23:23,0:48:0,96,959:..	0/0:24:24,0:50:0,90,899:..	0/0:21:21,0:50:0,63,629:..	0/0:16:16,0:48:0,72,719:..	0/0:20:20,0:48:0,81,809:..	0/0:18:18,0:50:0,69,689:..	0/0:16:16,0:48:0,54,539:..	0/0:25:25,0:48:0,75,749:..	0/0:16:16,0:48:0,48,479:..	0/0:22:22,0:50:0,72,719:..	0/0:16:16,0:48:0,69,689:..	0/0:16:16,0:48:0,48,479:..	0/0:21:21,0:50:0,69,689:..	0/0:20:20,0:50:0,66,659:..	0/0:16:16,0:48:0,75,749:..	0/0:23:23,0:50:0,72,719:..	0/0:22:22,0:48:0,69,689:..	0/0:16:16,0:48:0,75,749:..	0/0:24:24,0:50:0,72,719:..	0/0:21:21,0:48:0,75,749:..	0/0:18:18,0:50:0,63,629:..	0/0:24:24,0:48:0,75,749:..	seq2
chr6	77833702	chr6_77833702_G_A	G	A	37	AF=0.013889;AQ=37	GT:DP:AD:GQ:PL:RNC	0/0:16:16,0:48:0,51,509:..	0/0:22:22,0:36:0,36,599:..	0/0:22:22,0:36:0,36,599:..	0/0:24:24,0:50:0,72,719:..	0/0:25:25,0:45:0,45,689:..	0/1:31:18,13:38:37,0,53:..	0/0:17:17,0:48:0,63,629:..	0/0:13:13,0:39:0,39,389:..	0/0:18:18,0:24:0,24,479:..	0/0:23:23,0:48:0,105,1049:..	0/0:17:17,0:50:0,57,569:..	0/0:21:21,0:48:0,72,719:..	0/0:28:28,0:50:0,102,1019:..	0/0:24:24,0:42:0,42,659:..	0/0:23:23,0:48:0,72,719:..	0/0:19:19,0:27:0,27,509:..	0/0:23:23,0:48:0,72,719:..	0/0:24:24,0:48:0,72,719:..	0/0:17:17,0:21:0,21,449:..	0/0:20:20,0:30:0,30,539:..	0/0:24:24,0:50:0,75,749:..	0/0:26:26,0:50:0,102,1019:..	0/0:17:17,0:50:0,57,569:..	0/0:23:23,0:48:0,99,989:..	0/0:23:23,0:50:0,75,749:..	0/0:14:14,0:42:0,42,419:..	0/0:26:26,0:50:0,72,959:..	0/0:25:25,0:50:0,87,869:..	0/0:31:31,0:50:0,93,929:..	0/0:16:16,0:48:0,57,569:..	0/0:16:16,0:48:0,57,569:..	0/0:22:22,0:36:0,36,599:..	0/0:20:20,0:30:0,30,539:..	0/0:27:27,0:50:0,93,929:..	0/0:25:25,0:15:0,15,629:..	0/0:19:19,0:50:0,66,659:..	seq2
chr6	79962050	chr6_79962050_T_C	T	C	23	AF=0.013889;AQ=23	GT:DP:AD:GQ:PL:RNC	0/0:22:22,0:50:0,90,899:..	0/0:23:23,0:48:0,84,839:..	0/0:20:20,0:50:0,99,989:..	0/0:23:23,0:50:0,93,929:..	0/0:23:23,0:48:0,120,1199:..	0/0:24:24,0:50:0,81,809:..	0/0:19:19,0:50:0,75,749:..	0/0:17:17,0:50:0,93,929:..	0/0:22:22,0:50:0,69,689:..	0/0:27:27,0:50:0,81,809:..	0/0:18:18,0:50:0,69,689:..	0/0:28:28,0:50:0,111,1109:..	0/0:18:18,0:50:0,99,989:..	0/0:25:25,0:50:0,78,779:..	0/0:20:20,0:50:0,102,1019:..	0/0:16:16,0:48:0,60,599:..	0/0:20:20,0:50:0,66,659:..	0/0:18:18,0:50:0,60,599:..	0/1:21:15,6:23:23,0,46:..	0/0:21:21,0:50:0,93,929:..	0/0:18:18,0:50:0,66,659:..	0/0:23:23,0:50:0,111,1109:..	0/0:16:16,0:48:0,75,749:..	0/0:24:24,0:50:0,126,1259:..	0/0:24:24,0:48:0,84,839:..	0/0:25:25,0:48:0,102,1019:..	0/0:27:27,0:50:0,93,929:..	0/0:18:18,0:50:0,96,959:..	0/0:19:19,0:50:0,69,689:..	0/0:22:22,0:50:0,72,959:..	0/0:21:21,0:50:0,93,929:..	0/0:24:24,0:50:0,90,899:..	0/0:23:23,0:50:0,69,689:..	0/0:20:20,0:50:0,99,989:..	0/0:17:17,0:50:0,102,1019:..	0/0:23:23,0:50:0,69,689:..	seq2
chr6	89732047	chr6_89732047_G_A	G	A	41	AF=0.013889;AQ=41	GT:DP:AD:GQ:PL:RNC	0/0:20:20,0:48:0,99,989:..	0/0:16:16,0:48:0,54,539:..	0/0:16:16,0:48:0,63,629:..	0/0:23:23,0:50:0,72,719:..	0/0:25:25,0:50:0,105,1049:..	0/0:17:17,0:50:0,87,869:..	0/0:17:17,0:50:0,75,749:..	0/0:19:19,0:50:0,57,569:..	0/0:16:16,0:48:0,72,719:..	0/0:28:28,0:50:0,90,899:..	0/0:21:21,0:50:0,81,809:..	0/0:18:18,0:50:0,54,539:..	0/0:24:24,0:50:0,87,869:..	0/0:17:17,0:50:0,99,989:..	0/0:21:21,0:48:0,96,959:..	0/0:24:24,0:50:0,117,1169:..	0/0:29:29,0:50:0,90,899:..	0/1:25:11,14:41:41,0,53:..	0/0:20:20,0:50:0,66,659:..	0/0:24:24,0:50:0,102,1019:..	0/0:25:25,0:50:0,75,749:..	0/0:24:24,0:50:0,108,1079:..	0/0:20:20,0:48:0,75,749:..	0/0:27:27,0:50:0,84,839:..	0/0:17:17,0:50:0,90,899:..	0/0:18:18,0:50:0,57,569:..	0/0:20:20,0:50:0,90,899:..	0/0:16:16,0:48:0,81,809:..	0/0:20:20,0:50:0,60,599:..	0/0:12:12,0:36:0,39,389:..	0/0:25:25,0:45:0,45,689:..	0/0:22:22,0:48:0,84,839:..	0/0:19:19,0:50:0,66,659:..	0/0:21:21,0:50:0,75,749:..	0/0:21:21,0:50:0,66,659:..	0/0:26:26,0:50:0,81,809:..	seq2
chr6	91289484	chr6_91289484_C_T	C	T	39	AF=0.013889;AQ=39	GT:DP:AD:GQ:PL:RNC	0/0:22:22,0:48:0,66,659:..	0/0:23:23,0:50:0,69,689:..	0/0:18:18,0:50:0,75,749:..	0/0:24:24,0:50:0,105,1049:..	0/0:30:30,0:50:0,96,959:..	0/0:16:16,0:48:0,111,1109:..	0/0:22:22,0:48:0,99,989:..	0/0:17:17,0:50:0,57,569:..	0/0:23:23,0:50:0,69,689:..	0/0:20:20,0:50:0,78,779:..	0/0:14:14,0:42:0,42,419:..	0/0:28:28,0:50:0,96,959:..	0/0:20:20,0:50:0,60,839:..	0/0:23:23,0:48:0,102,1019:..	0/0:17:17,0:50:0,96,959:..	0/0:22:22,0:50:0,72,719:..	0/0:24:24,0:50:0,78,779:..	0/0:20:20,0:50:0,60,599:..	0/0:25:25,0:48:0,78,779:..	0/0:20:20,0:48:0,96,959:..	0/0:28:28,0:50:0,87,869:..	0/0:24:24,0:50:0,75,749:..	0/1:27:15,12:40:39,0,55:..	0/0:25:25,0:50:0,108,1079:..	0/0:28:28,0:50:0,123,1229:..	0/0:24:24,0:50:0,81,809:..	0/0:16:16,0:48:0,102,1019:..	0/0:25:25,0:50:0,75,749:..	0/0:22:22,0:50:0,66,659:..	0/0:20:20,0:50:0,63,629:..	0/0:21:21,0:50:0,72,719:..	0/0:24:24,0:50:0,75,749:..	0/0:23:23,0:50:0,69,689:..	0/0:16:16,0:48:0,54,539:..	0/0:22:22,0:50:0,72,719:..	0/0:21:21,0:48:0,72,719:..	seq2
chr6	94803314	chr6_94803314_C_T	C	T	38	AF=0.013889;AQ=38	GT:DP:AD:GQ:PL:RNC	0/0:23:23,0:50:0,72,719:..	0/0:19:19,0:50:0,60,599:..	0/0:17:17,0:50:0,78,779:..	0/0:25:25,0:50:0,81,809:..	0/1:29:16,13:38:38,0,50:..	0/0:21:21,0:50:0,72,719:..	0/0:19:19,0:48:0,75,749:..	0/0:24:24,0:48:0,90,899:..	0/0:25:25,0:50:0,81,809:..	0/0:25:25,0:50:0,78,779:..	0/0:28:28,0:50:0,117,1169:..	0/0:22:22,0:48:0,72,719:..	0/0:22:22,0:50:0,72,719:..	0/0:22:22,0:50:0,75,749:..	0/0:25:25,0:50:0,60,839:..	0/0:24:24,0:50:0,102,1019:..	0/0:27:27,0:50:0,81,809:..	0/0:23:23,0:50:0,84,839:..	0/0:20:20,0:50:0,72,719:..	0/0:26:26,0:50:0,87,869:..	0/0:18:18,0:50:0,105,1049:..	0/0:29:29,0:50:0,108,1079:..	0/0:17:17,0:50:0,63,629:..	0/0:25:25,0:50:0,84,839:..	0/0:21:21,0:50:0,75,749:..	0/0:17:17,0:50:0,63,629:..	0/0:25:25,0:48:0,84,839:..	0/0:14:14,0:42:0,42,419:..	0/0:23:23,0:50:0,78,779:..	0/0:16:16,0:48:0,63,629:..	0/0:21:21,0:48:0,78,779:..	0/0:20:20,0:48:0,60,599:..	0/0:18:18,0:50:0,54,539:..	0/0:22:22,0:50:0,96,959:..	0/0:24:24,0:50:0,75,749:..	0/0:24:24,0:50:0,72,719:..	seq2
chr6	99640903	chr6_99640903_T_C	T	C	11	AF=0.013889;AQ=11	GT:DP:AD:GQ:PL:RNC	0/0:18:18,0:50:0,60,599:..	0/0:19:19,0:50:0,57,569:..	0/0:23:23,0:48:0,75,749:..	0/0:20:20,0:48:0,69,689:..	0/0:27:27,0:50:0,84,839:..	0/0:22:22,0:50:0,75,749:..	0/0:19:19,0:50:0,69,689:..	0/0:25:25,0:50:0,75,749:..	0/0:23:23,0:48:0,69,689:..	0/0:20:20,0:50:0,60,599:..	0/0:22:22,0:50:0,75,749:..	0/0:27:27,0:50:0,90,899:..	0/0:18:18,0:50:0,63,629:..	0/0:23:23,0:48:0,72,719:..	0/0:22:22,0:48:0,75,749:..	0/0:26:26,0:50:0,78,779:..	0/1:33:26,7:12:11,0,41:..	0/0:18:18,0:50:0,57,569:..	0/0:24:24,0:50:0,72,719:..	0/0:26:26,0:50:0,93,929:..	0/0:16:16,0:48:0,48,479:..	0/0:30:30,0:50:0,108,1079:..	0/0:22:22,0:50:0,69,689:..	0/0:23:23,0:50:0,69,689:..	0/0:32:32,0:50:0,96,959:..	0/0:24:24,0:50:0,72,719:..	0/0:27:27,0:50:0,81,809:..	0/0:17:17,0:48:0,51,509:..	0/0:22:22,0:50:0,75,749:..	0/0:18:18,0:50:0,60,599:..	0/0:25:25,0:50:0,105,1049:..	0/0:25:25,0:50:0,75,749:..	0/0:19:19,0:50:0,60,599:..	0/0:17:17,0:48:0,72,719:..	0/0:26:26,0:50:0,96,959:..	0/0:21:21,0:50:0,63,629:..	seq2
chr6	100496415	chr6_100496415_C_T	C	T	48	AF=0.013889;AQ=48	GT:DP:AD:GQ:PL:RNC	0/0:25:25,0:50:0,105,1049:..	0/0:18:18,0:48:0,75,749:..	0/0:24:24,0:48:0,90,899:..	0/0:20:20,0:50:0,69,689:..	0/0:20:20,0:50:0,60,599:..	0/0:25:25,0:50:0,96,959:..	0/0:21:21,0:50:0,69,689:..	0/0:23:23,0:50:0,75,749:..	0/0:18:18,0:50:0,57,569:..	0/0:25:25,0:50:0,90,899:..	0/0:22:22,0:50:0,75,749:..	0/0:24:24,0:48:0,81,809:..	0/0:24:24,0:48:0,75,749:..	0/0:16:16,0:48:0,78,779:..	0/0:25:25,0:48:0,102,1019:..	0/0:20:20,0:48:0,72,719:..	0/0:19:19,0:50:0,57,569:..	0/0:17:17,0:50:0,87,869:..	0/1:33:14,19:47:48,0,52:..	0/0:21:21,0:50:0,66,659:..	0/0:22:22,0:50:0,99,989:..	0/0:24:24,0:50:0,105,1049:..	0/0:23:23,0:50:0,93,929:..	0/0:21:21,0:50:0,72,719:..	0/0:22:22,0:50:0,69,689:..	0/0:24:24,0:48:0,69,929:..	0/0:30:30,0:50:0,108,1079:..	0/0:31:31,0:50:0,108,1079:..	0/0:22:22,0:50:0,66,659:..	0/0:22:22,0:50:0,96,959:..	0/0:21:21,0:50:0,72,719:..	0/0:23:23,0:48:0,72,719:..	0/0:22:22,0:50:0,75,749:..	0/0:18:18,0:50:0,69,689:..	0/0:24:24,0:50:0,75,749:..	0/0:21:21,0:48:0,96,959:..	seq2
chr6	102609645	chr6_102609645_A_T	A	T	38	AF=0.013889;AQ=38	GT:DP:AD:GQ:PL:RNC	0/0:21:21,0:48:0,75,749:..	0/0:16:16,0:48:0,48,479:..	0/0:25:25,0:48:0,105,1049:..	0/0:21:21,0:48:0,72,719:..	0/0:16:16,0:48:0,51,509:..	0/0:19:19,0:48:0,69,689:..	0/0:13:13,0:39:0,39,389:..	0/0:16:16,0:48:0,57,569:..	0/0:16:16,0:48:0,48,479:..	0/0:24:24,0:50:0,87,869:..	0/0:16:16,0:48:0,48,479:..	0/0:23:23,0:50:0,72,719:..	0/0:19:19,0:27:0,27,509:..	0/0:21:21,0:50:0,78,779:..	0/0:21:21,0:48:0,81,809:..	0/0:23:23,0:50:0,72,719:..	0/0:22:22,0:50:0,75,749:..	0/0:16:16,0:48:0,48,479:..	0/0:18:18,0:50:0,75,749:..	0/1:28:13,15:38:38,0,50:..	0/0:22:22,0:50:0,69,689:..	0/0:23:23,0:48:0,72,719:..	0/0:16:16,0:48:0,48,479:..	0/0:19:19,0:50:0,63,629:..	0/0:21:21,0:48:0,66,659:..	0/0:25:25,0:50:0,75,749:..	0/0:24:24,0:50:0,78,779:..	0/0:17:17,0:48:0,69,689:..	0/0:22:22,0:50:0,75,749:..	0/0:20:20,0:50:0,63,629:..	0/0:18:18,0:50:0,60,599:..	0/0:16:16,0:48:0,69,689:..	0/0:23:23,0:48:0,75,749:..	0/0:24:24,0:48:0,93,929:..	0/0:19:19,0:50:0,75,749:..	0/0:22:22,0:48:0,69,689:..	seq2
chr6	104297000	chr6_104297000_C_T	C	T	29	AF=0.013889;AQ=29	GT:DP:AD:GQ:PL:RNC	0/0:22:22,0:50:0,66,659:..	0/0:22:22,0:50:0,66,659:..	0/0:21:21,0:50:0,66,899:..	0/0:23:23,0:48:0,48,719:..	0/0:24:24,0:12:0,12,599:..	0/0:20:20,0:48:0,63,629:..	0/0:22:22,0:50:0,69,689:..	0/0:17:17,0:50:0,60,599:..	0/0:25:25,0:50:0,75,749:..	0/1:33:21,12:30:29,0,45:..	0/0:23:23,0:50:0,72,719:..	0/0:25:25,0:50:0,75,749:..	0/0:25:25,0:50:0,75,749:..	0/0:25:25,0:50:0,93,929:..	0/0:26:26,0:50:0,84,839:..	0/0:16:16,0:48:0,48,479:..	0/0:24:24,0:50:0,72,719:..	0/0:25:25,0:50:0,96,959:..	0/0:18:18,0:50:0,60,599:..	0/0:24:24,0:50:0,78,779:..	0/0:24:24,0:50:0,72,719:..	0/0:30:30,0:48:0,102,1019:..	0/0:25:25,0:48:0,75,749:..	0/0:25:25,0:48:0,75,749:..	0/0:21:21,0:48:0,63,629:..	0/0:32:32,0:50:0,102,1019:..	0/0:25:25,0:50:0,75,749:..	0/0:23:23,0:50:0,69,689:..	0/0:24:24,0:50:0,72,719:..	0/0:22:22,0:50:0,75,749:..	0/0:22:22,0:48:0,69,689:..	0/0:24:24,0:48:0,75,749:..	0/0:23:23,0:50:0,72,719:..	0/0:17:17,0:50:0,63,629:..	0/0:23:23,0:48:0,81,809:..	0/0:23:23,0:39:0,39,629:..	seq2
chr6	109664782	chr6_109664782_G_A	G	A	21	AF=0.013889;AQ=21	GT:DP:AD:GQ:PL:RNC	0/0:17:17,0:50:0,75,749:..	0/0:22:22,0:48:0,72,719:..	0/0:24:24,0:50:0,72,719:..	0/0:20:20,0:50:0,72,719:..	0/0:16:16,0:48:0,48,479:..	0/0:20:20,0:48:0,99,989:..	0/0:24:24,0:48:0,105,1049:..	0/0:20:20,0:48:0,72,719:..	0/0:17:17,0:50:0,72,719:..	0/0:16:16,0:48:0,75,749:..	0/0:25:25,0:48:0,60,839:..	0/0:25:25,0:48:0,87,869:..	0/0:21:21,0:50:0,90,899:..	0/0:25:25,0:50:0,105,1049:..	0/0:16:16,0:48:0,48,479:..	0/0:19:19,0:48:0,75,749:..	0/0:17:17,0:48:0,63,629:..	0/0:14:14,0:42:0,42,419:..	0/0:18:18,0:50:0,60,599:..	0/0:24:24,0:48:0,75,749:..	0/0:22:22,0:50:0,66,659:..	0/0:26:26,0:50:0,117,1169:..	0/0:16:16,0:48:0,72,719:..	0/0:25:25,0:48:0,96,959:..	0/0:19:19,0:50:0,60,599:..	0/0:24:24,0:50:0,75,749:..	0/0:18:18,0:50:0,54,539:..	0/0:24:24,0:50:0,75,749:..	0/0:18:18,0:50:0,63,629:..	0/0:20:20,0:50:0,60,599:..	0/0:20:20,0:50:0,66,659:..	0/0:20:20,0:50:0,66,659:..	0/0:24:24,0:50:0,72,719:..	0/1:28:20,8:21:21,0,45:..	0/0:16:16,0:48:0,48,479:..	0/0:27:27,0:50:0,93,929:..	seq2
chr6	115662466	chr6_115662466_C_G	C	G	42	AF=0.013889;AQ=42	GT:DP:AD:GQ:PL:RNC	0/0:21:21,0:48:0,66,659:..	0/0:23:23,0:48:0,69,689:..	0/0:16:16,0:48:0,66,659:..	0/0:23:23,0:50:0,75,749:..	0/0:22:22,0:48:0,84,839:..	0/0:21:21,0:48:0,84,839:..	0/0:17:17,0:50:0,75,749:..	0/0:22:22,0:48:0,75,749:..	0/0:22:22,0:50:0,69,689:..	0/0:21:21,0:48:0,69,689:..	0/0:22:22,0:50:0,99,989:..	0/0:24:24,0:50:0,135,1349:..	0/0:20:20,0:48:0,72,719:..	0/0:19:19,0:48:0,72,719:..	0/0:25:25,0:50:0,75,749:..	0/0:20:20,0:50:0,84,839:..	0/0:21:21,0:48:0,105,1049:..	0/1:18:5,13:41:42,0,49:..	0/0:22:22,0:50:0,66,659:..	0/0:24:24,0:50:0,96,959:..	0/0:23:23,0:50:0,72,719:..	0/0:23:23,0:48:0,78,779:..	0/0:18:18,0:50:0,93,929:..	0/0:25:25,0:50:0,99,989:..	0/0:22:22,0:50:0,66,659:..	0/0:24:24,0:50:0,75,749:..	0/0:30:30,0:50:0,102,1019:..	0/0:17:17,0:50:0,66,659:..	0/0:18:18,0:50:0,75,749:..	0/0:18:18,0:48:0,54,539:..	0/0:22:22,0:50:0,66,659:..	0/0:25:25,0:50:0,96,959:..	0/0:25:25,0:48:0,78,779:..	0/0:22:22,0:50:0,102,1019:..	0/0:28:28,0:50:0,105,1049:..	0/0:22:22,0:50:0,66,659:..	seq2
chr6	127989678	chr6_127989678_T_C	T	C	43	AF=0.013889;AQ=43	GT:DP:AD:GQ:PL:RNC	0/0:16:16,0:48:0,72,719:..	0/0:16:16,0:48:0,69,689:..	0/0:21:21,0:50:0,75,749:..	0/0:20:20,0:48:0,75,749:..	0/0:31:31,0:50:0,96,959:..	0/0:16:16,0:48:0,63,629:..	0/1:19:7,12:43:43,0,51:..	0/0:25:25,0:50:0,90,899:..	0/0:20:20,0:50:0,69,689:..	0/0:22:22,0:48:0,81,809:..	0/0:23:23,0:50:0,99,989:..	0/0:25:25,0:50:0,75,749:..	0/0:18:18,0:48:0,75,749:..	0/0:23:23,0:48:0,93,929:..	0/0:21:21,0:50:0,96,959:..	0/0:24:24,0:50:0,84,839:..	0/0:20:20,0:50:0,99,989:..	0/0:24:24,0:48:0,75,749:..	0/0:18:18,0:50:0,54,539:..	0/0:26:26,0:50:0,72,959:..	0/0:23:23,0:48:0,72,719:..	0/0:27:27,0:50:0,87,869:..	0/0:22:22,0:48:0,108,1079:..	0/0:26:26,0:50:0,99,989:..	0/0:21:21,0:50:0,114,1139:..	0/0:23:23,0:48:0,48,719:..	0/0:35:35,0:50:0,105,1049:..	0/0:23:23,0:48:0,69,689:..	0/0:20:20,0:48:0,63,629:..	0/0:20:20,0:48:0,69,689:..	0/0:25:25,0:48:0,78,779:..	0/0:22:22,0:50:0,78,779:..	0/0:20:20,0:48:0,60,599:..	0/0:21:21,0:50:0,72,719:..	0/0:19:19,0:50:0,72,719:..	0/0:31:31,0:50:0,96,959:..	seq2
chr6	132901520	chr6_132901520_C_T	C	T	45	AF=0.013889;AQ=45	GT:DP:AD:GQ:PL:RNC	0/0:16:16,0:48:0,69,689:..	0/0:18:18,0:24:0,24,479:..	0/0:22:22,0:50:0,87,869:..	0/0:18:18,0:50:0,72,719:..	0/0:19:19,0:50:0,63,629:..	0/0:22:22,0:50:0,72,719:..	0/0:16:16,0:48:0,57,569:..	0/0:15:15,0:45:0,45,449:..	0/0:17:17,0:50:0,75,749:..	0/0:26:26,0:50:0,84,839:..	0/0:20:20,0:48:0,60,599:..	0/0:23:23,0:48:0,75,749:..	0/1:28:15,13:45:45,0,56:..	0/0:17:17,0:50:0,105,1049:..	0/0:22:22,0:48:0,75,749:..	0/0:18:18,0:50:0,72,719:..	0/0:22:22,0:50:0,66,659:..	0/0:20:20,0:50:0,63,629:..	0/0:22:22,0:48:0,66,659:..	0/0:22:22,0:50:0,69,689:..	0/0:20:20,0:50:0,63,629:..	0/0:27:27,0:48:0,96,959:..	0/0:20:20,0:50:0,66,659:..	0/0:27:27,0:48:0,105,1049:..	0/0:19:19,0:50:0,63,629:..	0/0:17:17,0:50:0,51,509:..	0/0:23:23,0:50:0,75,749:..	0/0:22:22,0:48:0,69,689:..	0/0:23:23,0:48:0,111,1109:..	0/0:23:23,0:48:0,75,749:..	0/0:24:24,0:50:0,90,899:..	0/0:15:15,0:45:0,45,449:..	0/0:20:20,0:48:0,78,779:..	0/0:24:24,0:50:0,96,959:..	0/0:16:16,0:48:0,48,479:..	0/0:16:16,0:48:0,51,509:..	seq2
chr6	142342618	chr6_142342618_G_A	G	A	19	AF=0.013889;AQ=19	GT:DP:AD:GQ:PL:RNC	0/0:26:26,0:18:0,18,659:..	0/0:16:16,0:48:0,51,509:..	0/0:20:20,0:50:0,69,689:..	0/0:24:24,0:50:0,75,749:..	0/0:23:23,0:50:0,69,689:..	0/0:25:25,0:48:0,93,929:..	0/0:28:28,0:50:0,84,839:..	0/0:25:25,0:48:0,99,989:..	0/0:14:14,0:42:0,45,449:..	0/0:21:21,0:50:0,66,659:..	0/0:20:20,0:48:0,75,749:..	0/0:16:16,0:48:0,66,659:..	0/0:26:26,0:50:0,78,779:..	0/0:24:24,0:48:0,72,719:..	0/0:26:26,0:50:0,114,1139:..	0/0:22:22,0:50:0,99,989:..	0/0:30:30,0:50:0,96,959:..	0/0:17:17,0:50:0,51,509:..	0/0:16:16,0:48:0,51,509:..	0/0:35:35,0:48:0,78,1019:..	0/0:24:24,0:42:0,42,659:..	0/0:23:23,0:48:0,75,749:..	0/0:18:18,0:50:0,54,539:..	0/0:21:21,0:50:0,63,629:..	0/0:16:16,0:48:0,48,479:..	0/0:24:24,0:50:0,72,719:..	0/1:31:14,15:19:19,0,28:..	0/0:26:26,0:50:0,81,809:..	0/0:30:30,0:50:0,90,899:..	0/0:19:19,0:50:0,60,599:..	0/0:22:22,0:50:0,117,1169:..	0/0:24:24,0:48:0,75,749:..	0/0:19:19,0:50:0,66,659:..	0/0:25:25,0:48:0,75,749:..	0/0:21:21,0:50:0,66,659:..	0/0:20:20,0:30:0,30,539:..	seq2
chr6	144734169	chr6_144734169_C_T	C	T	45	AF=0.013889;AQ=45	GT:DP:AD:GQ:PL:RNC	0/0:23:23,0:50:0,93,929:..	0/0:16:16,0:48:0,63,629:..	0/0:19:19,0:48:0,57,569:..	0/0:23:23,0:48:0,75,989:..	0/0:17:17,0:50:0,69,689:..	0/0:20:20,0:48:0,81,809:..	0/0:21:21,0:50:0,66,659:..	0/0:17:17,0:50:0,93,929:..	0/0:23:23,0:50:0,72,719:..	0/0:21:21,0:48:0,78,779:..	0/0:16:16,0:48:0,69,689:..	0/0:26:26,0:50:0,102,1019:..	0/0:16:16,0:48:0,54,539:..	0/0:27:27,0:50:0,90,899:..	0/0:23:23,0:48:0,117,1169:..	0/0:26:26,0:50:0,99,989:..	0/0:29:29,0:50:0,96,959:..	0/0:23:23,0:48:0,84,839:..	0/0:25:25,0:50:0,78,779:..	0/0:16:16,0:48:0,87,869:..	0/0:16:16,0:48:0,81,809:..	0/0:29:29,0:50:0,96,959:..	0/0:17:17,0:50:0,75,749:..	0/0:26:26,0:50:0,69,929:..	0/0:17:17,0:50:0,60,599:..	0/0:31:31,0:50:0,111,1109:..	0/1:42:14,28:44:45,0,49:..	0/0:21:21,0:48:0,90,899:..	0/0:25:25,0:48:0,81,809:..	0/0:25:25,0:50:0,87,869:..	0/0:31:31,0:50:0,93,929:..	0/0:24:24,0:48:0,75,749:..	0/0:24:24,0:48:0,75,749:..	0/0:24:24,0:50:0,75,749:..	0/0:20:20,0:48:0,60,599:..	0/0:28:28,0:50:0,93,929:..	seq2
chr7	6809339	chr7_6809339_G_A	G	A	13	AF=0.013889;AQ=13	GT:DP:AD:GQ:PL:RNC	0/0:23:23,0:39:0,39,629:..	0/0:17:17,0:50:0,54,539:..	0/0:27:27,0:50:0,84,839:..	0/0:18:18,0:48:0,72,719:..	0/0:23:23,0:48:0,51,749:..	0/0:20:20,0:48:0,63,629:..	0/0:10:10,0:30:0,30,299:..	0/0:21:21,0:50:0,90,899:..	0/0:22:22,0:50:0,66,659:..	0/0:9:9,0:27:0,27,269:..	0/0:19:19,0:50:0,63,629:..	0/0:17:17,0:48:0,66,659:..	0/0:16:16,0:48:0,51,509:..	0/0:23:23,0:50:0,72,719:..	0/1:16:13,3:14:13,0,39:..	0/0:19:19,0:50:0,63,629:..	0/0:18:18,0:50:0,54,539:..	0/0:20:20,0:50:0,66,659:..	0/0:21:21,0:50:0,63,629:..	0/0:17:17,0:48:0,63,629:..	0/0:18:18,0:50:0,60,599:..	0/0:27:27,0:50:0,81,809:..	0/0:16:16,0:48:0,48,479:..	0/0:25:25,0:50:0,75,749:..	0/0:21:21,0:50:0,72,719:..	0/0:18:18,0:50:0,63,629:..	0/0:17:17,0:50:0,51,509:..	0/0:20:20,0:50:0,66,659:..	0/0:16:16,0:48:0,51,509:..	0/0:22:22,0:50:0,66,659:..	0/0:24:24,0:50:0,72,719:..	0/0:25:25,0:50:0,75,749:..	0/0:23:23,0:50:0,69,689:..	0/0:19:19,0:50:0,63,629:..	0/0:24:24,0:50:0,51,749:..	0/0:18:18,0:50:0,63,629:..	seq2
chr7	18463764	chr7_18463764_G_T	G	T	43	AF=0.013889;AQ=43	GT:DP:AD:GQ:PL:RNC	0/0:20:20,0:50:0,63,629:..	0/0:18:18,0:48:0,57,569:..	0/0:24:24,0:48:0,75,749:..	0/0:21:21,0:48:0,75,749:..	0/0:18:18,0:50:0,63,629:..	0/0:23:23,0:48:0,81,809:..	0/0:19:19,0:50:0,69,689:..	0/0:19:19,0:48:0,57,569:..	0/0:24:24,0:48:0,72,719:..	0/0:21:21,0:48:0,72,719:..	0/0:16:16,0:48:0,48,479:..	0/1:26:12,14:43:43,0,52:..	0/0:19:19,0:48:0,93,929:..	0/0:25:25,0:50:0,75,749:..	0/0:22:22,0:50:0,69,689:..	0/0:23:23,0:50:0,75,749:..	0/0:20:20,0:48:0,63,629:..	0/0:23:23,0:48:0,72,719:..	0/0:21:21,0:50:0,66,659:..	0/0:19:19,0:50:0,111,1109:..	0/0:18:18,0:50:0,60,599:..	0/0:19:19,0:50:0,63,629:..	0/0:17:17,0:50:0,72,719:..	0/0:28:28,0:50:0,96,959:..	0/0:24:24,0:48:0,78,779:..	0/0:23:23,0:50:0,102,1019:..	0/0:18:18,0:48:0,87,869:..	0/0:16:16,0:48:0,72,719:..	0/0:17:17,0:50:0,54,539:..	0/0:22:22,0:50:0,75,749:..	0/0:16:16,0:48:0,93,929:..	0/0:16:16,0:48:0,60,599:..	0/0:17:17,0:48:0,75,749:..	0/0:17:17,0:50:0,63,629:..	0/0:18:18,0:50:0,63,629:..	0/0:23:23,0:48:0,75,749:..	seq2
chr7	23247919	chr7_23247919_C_T	C	T	42	AF=0.013889;AQ=42	GT:DP:AD:GQ:PL:RNC	0/0:22:22,0:50:0,72,719:..	0/0:31:31,0:50:0,99,989:..	0/0:29:29,0:50:0,87,869:..	0/0:23:23,0:50:0,69,689:..	0/0:23:23,0:50:0,72,719:..	0/0:25:25,0:50:0,75,749:..	0/0:24:24,0:50:0,72,719:..	0/0:24:24,0:50:0,75,749:..	0/0:26:26,0:50:0,93,929:..	0/0:25:25,0:50:0,75,749:..	0/0:22:22,0:50:0,78,779:..	0/0:23:23,0:48:0,78,779:..	0/0:26:26,0:50:0,78,779:..	0/0:25:25,0:50:0,75,749:..	0/0:24:24,0:48:0,96,959:..	0/0:19:19,0:50:0,57,569:..	0/0:24:24,0:48:0,78,779:..	0/0:22:22,0:50:0,96,959:..	0/0:34:34,0:50:0,75,989:..	0/1:35:13,22:40:42,0,43:..	0/0:22:22,0:48:0,66,659:..	0/0:38:38,0:50:0,150,1499:..	0/0:34:34,0:50:0,105,1049:..	0/0:30:30,0:50:0,120,1199:..	0/0:27:27,0:50:0,81,809:..	0/0:26:26,0:48:0,84,839:..	0/0:29:29,0:50:0,90,899:..	0/0:23:23,0:50:0,75,749:..	0/0:17:17,0:50:0,72,719:..	0/0:25:25,0:50:0,78,779:..	0/0:26:26,0:48:0,87,869:..	0/0:25:25,0:48:0,75,749:..	0/0:23:23,0:50:0,75,749:..	0/0:21:21,0:48:0,63,629:..	0/0:31:31,0:50:0,99,989:..	0/0:23:23,0:50:0,84,839:..	seq2
chr7	35770425	chr7_35770425_A_C	A	C	29	AF=0.013889;AQ=29	GT:DP:AD:GQ:PL:RNC	0/0:22:22,0:50:0,93,929:..	0/0:19:19,0:50:0,75,749:..	0/0:22:22,0:48:0,69,689:..	0/1:29:20,9:29:29,0,51:..	0/0:20:20,0:50:0,66,659:..	0/0:18:18,0:48:0,72,719:..	0/0:16:16,0:48:0,75,749:..	0/0:16:16,0:48:0,57,569:..	0/0:23:23,0:50:0,69,689:..	0/0:22:22,0:48:0,69,689:..	0/0:20:20,0:50:0,75,749:..	0/0:24:24,0:50:0,72,719:..	0/0:22:22,0:48:0,66,659:..	0/0:24:24,0:50:0,75,749:..	0/0:16:16,0:48:0,75,749:..	0/0:19:19,0:50:0,57,569:..	0/0:17:17,0:50:0,51,509:..	0/0:20:20,0:50:0,75,749:..	0/0:20:20,0:48:0,75,749:..	0/0:22:22,0:48:0,81,809:..	0/0:24:24,0:50:0,75,749:..	0/0:22:22,0:48:0,141,1409:..	0/0:20:20,0:50:0,69,689:..	0/0:22:22,0:50:0,72,719:..	0/0:20:20,0:48:0,99,989:..	0/0:28:28,0:50:0,93,929:..	0/0:25:25,0:48:0,120,1439:..	0/0:24:24,0:48:0,75,749:..	0/0:20:20,0:50:0,60,599:..	0/0:17:17,0:50:0,63,629:..	0/0:22:22,0:50:0,72,719:..	0/0:16:16,0:48:0,48,479:..	0/0:24:24,0:48:0,48,719:..	0/0:23:23,0:48:0,69,689:..	0/0:16:16,0:48:0,48,479:..	0/0:20:20,0:30:0,30,539:..	seq2
chr7	36121546	chr7_36121546_G_T	G	T	36	AF=0.013889;AQ=36	GT:DP:AD:GQ:PL:RNC	0/0:16:16,0:48:0,66,659:..	0/0:20:20,0:50:0,72,719:..	0/0:21:21,0:48:0,69,689:..	0/0:28:28,0:50:0,60,839:..	0/0:21:21,0:48:0,69,689:..	0/0:24:24,0:48:0,117,1169:..	0/0:20:20,0:48:0,90,899:..	0/0:24:24,0:48:0,72,719:..	0/0:21:21,0:48:0,84,839:..	0/0:18:18,0:50:0,54,539:..	0/0:24:24,0:50:0,72,719:..	0/0:25:25,0:50:0,75,749:..	0/0:21:21,0:50:0,63,629:..	0/0:16:16,0:48:0,69,689:..	0/0:24:24,0:50:0,72,719:..	0/0:17:17,0:50:0,54,539:..	0/0:23:23,0:48:0,75,749:..	0/0:20:20,0:50:0,63,629:..	0/0:23:23,0:50:0,72,719:..	0/0:22:22,0:50:0,66,659:..	0/0:24:24,0:48:0,93,929:..	0/0:22:22,0:48:0,129,1289:..	0/0:16:16,0:48:0,48,479:..	0/0:22:22,0:50:0,72,719:..	0/0:19:19,0:48:0,93,929:..	0/1:30:17,13:36:36,0,51:..	0/0:28:28,0:50:0,105,1049:..	0/0:21:21,0:48:0,90,899:..	0/0:21:21,0:50:0,63,629:..	0/0:18:18,0:50:0,57,569:..	0/0:23:23,0:39:0,39,629:..	0/0:18:18,0:50:0,75,749:..	0/0:21:21,0:50:0,63,629:..	0/0:23:23,0:50:0,102,1019:..	0/0:20:20,0:48:0,72,719:..	0/0:19:19,0:50:0,69,929:..	seq2
chr7	46230263	chr7_46230263_G_A	G	A	36	AF=0.013889;AQ=36	GT:DP:AD:GQ:PL:RNC	0/0:25:25,0:50:0,105,1049:..	0/0:16:16,0:48:0,75,749:..	0/0:24:24,0:50:0,75,749:..	0/0:17:17,0:50:0,81,809:..	0/0:23:23,0:50:0,72,719:..	0/0:23:23,0:50:0,75,749:..	0/0:19:19,0:50:0,69,689:..	0/0:21:21,0:48:0,120,1199:..	0/0:20:20,0:50:0,69,689:..	0/0:25:25,0:50:0,93,929:..	0/0:24:24,0:50:0,102,1019:..	0/0:18:18,0:50:0,72,719:..	0/0:30:30,0:48:0,102,1019:..	0/0:28:28,0:50:0,123,1229:..	0/0:21:21,0:48:0,108,1079:..	0/0:29:29,0:50:0,90,899:..	0/0:21:21,0:48:0,102,1019:..	0/0:19:19,0:50:0,66,659:..	0/0:21:21,0:48:0,66,659:..	0/0:21:21,0:50:0,96,959:..	0/0:20:20,0:48:0,75,749:..	0/0:20:20,0:50:0,72,719:..	0/0:20:20,0:50:0,111,1109:..	0/0:24:24,0:50:0,132,1319:..	0/0:24:24,0:48:0,75,749:..	0/0:27:27,0:50:0,117,1169:..	0/0:21:21,0:48:0,105,1049:..	0/0:22:22,0:48:0,75,749:..	0/0:16:16,0:48:0,96,959:..	0/0:22:22,0:48:0,69,689:..	0/0:20:20,0:50:0,72,719:..	0/0:26:26,0:50:0,90,899:..	0/0:24:24,0:50:0,72,719:..	0/1:28:17,11:36:36,0,54:..	0/0:18:18,0:50:0,90,899:..	0/0:21:21,0:50:0,75,749:..	seq2
chr7	48155300	chr7_48155300_C_G	C	G	46	AF=0.013889;AQ=46	GT:DP:AD:GQ:PL:RNC	0/0:25:25,0:50:0,75,749:..	0/0:22:22,0:48:0,69,689:..	0/0:25:25,0:50:0,96,959:..	0/0:25:25,0:50:0,102,1019:..	0/0:21:21,0:50:0,69,689:..	0/0:25:25,0:50:0,111,1109:..	0/0:19:19,0:50:0,60,599:..	0/1:29:13,16:45:46,0,49:..	0/0:22:22,0:48:0,114,1139:..	0/0:25:25,0:50:0,102,1019:..	0/0:22:22,0:48:0,108,1079:..	0/0:26:26,0:50:0,93,929:..	0/0:19:19,0:50:0,78,779:..	0/0:20:20,0:50:0,63,629:..	0/0:20:20,0:50:0,108,1079:..	0/0:21:21,0:50:0,66,659:..	0/0:21:21,0:48:0,75,749:..	0/0:25:25,0:48:0,96,959:..	0/0:24:24,0:50:0,93,929:..	0/0:19:19,0:50:0,75,749:..	0/0:18:18,0:50:0,66,659:..	0/0:27:27,0:50:0,93,929:..	0/0:23:23,0:48:0,69,689:..	0/0:27:27,0:50:0,147,1469:..	0/0:19:19,0:48:0,72,719:..	0/0:16:16,0:48:0,72,719:..	0/0:17:17,0:50:0,51,509:..	0/0:21:21,0:48:0,63,629:..	0/0:25:25,0:48:0,84,839:..	0/0:20:20,0:50:0,69,689:..	0/0:18:18,0:50:0,96,959:..	0/0:18:18,0:50:0,66,659:..	0/0:23:23,0:50:0,72,719:..	0/0:18:18,0:50:0,60,599:..	0/0:22:22,0:48:0,69,689:..	0/0:24:24,0:48:0,117,1169:..	seq2
chr7	50576966	chr7_50576966_T_A	T	A	41	AF=0.013889;AQ=41	GT:DP:AD:GQ:PL:RNC	0/0:34:34,0:50:0,102,1019:..	0/0:45:45,0:50:0,138,1379:..	0/0:43:43,0:50:0,135,1349:..	0/0:44:44,0:50:0,132,1319:..	0/0:38:38,0:50:0,117,1169:..	0/0:52:52,0:50:0,162,1619:..	0/0:43:43,0:50:0,129,1289:..	0/0:32:32,0:50:0,96,959:..	0/0:32:32,0:50:0,99,989:..	0/0:50:50,0:50:0,150,1499:..	0/0:37:37,0:50:0,114,1139:..	0/0:57:57,0:50:0,171,1709:..	0/0:39:39,0:50:0,120,1199:..	0/0:47:47,0:50:0,144,1439:..	0/0:33:33,0:50:0,102,1019:..	0/0:29:29,0:50:0,90,899:..	0/0:38:38,0:50:0,120,1199:..	0/0:36:36,0:50:0,114,1139:..	0/0:31:31,0:50:0,93,929:..	0/0:26:26,0:48:0,90,899:..	0/0:25:25,0:48:0,78,779:..	0/0:43:43,0:50:0,129,1289:..	0/0:33:33,0:50:0,72,959:..	0/0:41:41,0:50:0,129,1289:..	0/0:46:46,0:50:0,138,1379:..	0/0:26:26,0:50:0,78,779:..	0/0:30:30,0:50:0,90,899:..	0/0:26:26,0:50:0,78,779:..	0/0:30:30,0:50:0,93,929:..	0/0:45:45,0:50:0,138,1379:..	0/0:28:28,0:50:0,84,839:..	0/0:39:39,0:27:0,27,989:..	0/0:24:24,0:50:0,72,719:..	0/0:30:30,0:50:0,90,899:..	0/1:32:21,10:42:41,0,55:..	0/0:37:37,0:50:0,117,1169:..	seq2
chr7	56731904	chr7_56731904_C_T	C	T	31	AF=0.013889;AQ=31	GT:DP:AD:GQ:PL:RNC	0/0:24:24,0:48:0,72,719:..	0/0:28:28,0:50:0,93,929:..	0/0:25:25,0:48:0,75,749:..	0/0:24:24,0:50:0,75,749:..	0/0:22:22,0:50:0,69,689:..	0/0:23:23,0:50:0,75,749:..	0/0:17:17,0:50:0,63,629:..	0/0:22:22,0:50:0,72,719:..	0/0:16:16,0:48:0,66,659:..	0/0:24:24,0:50:0,75,749:..	0/0:16:16,0:48:0,48,479:..	0/0:21:21,0:50:0,78,779:..	0/0:22:22,0:50:0,69,689:..	0/0:30:30,0:50:0,90,899:..	0/0:24:24,0:48:0,75,749:..	0/0:25:25,0:50:0,75,749:..	0/0:20:20,0:50:0,66,659:..	0/0:22:22,0:50:0,72,719:..	0/0:18:18,0:48:0,63,629:..	0/0:19:19,0:50:0,69,689:..	0/0:23:23,0:48:0,72,719:..	0/0:24:24,0:50:0,75,749:..	0/0:22:22,0:48:0,72,719:..	0/0:26:26,0:50:0,78,779:..	0/0:20:20,0:50:0,69,689:..	0/0:23:23,0:48:0,69,689:..	0/0:23:23,0:50:0,75,749:..	0/0:19:19,0:50:0,66,659:..	0/0:16:16,0:48:0,48,479:..	0/0:16:16,0:48:0,48,479:..	0/0:24:24,0:42:0,42,659:..	0/0:22:22,0:50:0,66,659:..	0/0:19:19,0:50:0,60,599:..	0/0:24:24,0:50:0,78,779:..	0/0:14:14,0:42:0,45,449:..	0/1:37:24,13:31:31,0,52:..	seq2
chr7	57794778	chr7_57794778_A_C	A	C	29	AF=0.013889;AQ=29	GT:DP:AD:GQ:PL:RNC	0/0:22:22,0:50:0,69,689:..	0/0:18:18,0:50:0,63,629:..	0/0:25:25,0:50:0,93,929:..	0/0:25:25,0:48:0,87,869:..	0/0:25:25,0:48:0,75,749:..	0/0:23:23,0:48:0,75,749:..	0/0:33:33,0:50:0,102,1019:..	0/0:19:19,0:50:0,57,569:..	0/0:26:26,0:48:0,93,929:..	0/0:23:23,0:50:0,69,689:..	0/0:18:18,0:50:0,54,539:..	0/1:24:16,8:29:29,0,48:..	0/0:25:25,0:48:0,93,929:..	0/0:27:27,0:50:0,81,809:..	0/0:20:20,0:50:0,63,629:..	0/0:33:33,0:50:0,105,1049:..	0/0:22:22,0:50:0,69,689:..	0/0:16:16,0:48:0,87,869:..	0/0:21:21,0:50:0,63,629:..	0/0:23:23,0:50:0,96,959:..	0/0:28:28,0:50:0,90,899:..	0/0:31:31,0:50:0,99,989:..	0/0:24:24,0:48:0,78,779:..	0/0:31:31,0:50:0,69,929:..	0/0:24:24,0:50:0,72,719:..	0/0:24:24,0:50:0,72,719:..	0/0:29:29,0:50:0,87,869:..	0/0:22:22,0:50:0,66,659:..	0/0:23:23,0:50:0,69,689:..	0/0:24:24,0:50:0,72,719:..	0/0:25:25,0:50:0,102,1019:..	0/0:22:22,0:48:0,84,839:..	0/0:23:23,0:50:0,78,779:..	0/0:25:25,0:50:0,75,749:..	0/0:22:22,0:50:0,69,689:..	0/0:23:23,0:50:0,69,689:..	seq2
chr7	61595284	chr7_61595284_G_A	G	A	42	AF=0.013889;AQ=42	GT:DP:AD:GQ:PL:RNC	0/0:19:19,0:50:0,60,599:..	0/0:15:15,0:45:0,45,449:..	0/0:17:17,0:50:0,69,689:..	0/0:24:24,0:50:0,72,719:..	0/0:21:21,0:48:0,69,689:..	0/0:17:17,0:50:0,54,539:..	0/0:18:18,0:50:0,60,599:..	0/0:19:19,0:50:0,75,749:..	0/0:16:16,0:48:0,72,719:..	0/0:19:19,0:50:0,84,839:..	0/0:25:25,0:50:0,75,749:..	0/0:24:24,0:50:0,96,959:..	0/0:24:24,0:50:0,72,719:..	0/0:19:19,0:50:0,57,569:..	0/0:22:22,0:48:0,90,899:..	0/0:22:22,0:50:0,75,749:..	0/0:23:23,0:48:0,69,689:..	0/0:22:22,0:50:0,78,779:..	0/0:22:22,0:36:0,36,599:..	0/0:21:21,0:48:0,75,749:..	0/0:26:26,0:50:0,81,809:..	0/0:23:23,0:50:0,96,959:..	0/0:25:25,0:48:0,78,779:..	0/0:16:16,0:48:0,90,899:..	0/0:24:24,0:50:0,99,989:..	0/0:21:21,0:50:0,69,689:..	0/0:26:26,0:50:0,129,1289:..	0/1:27:11,16:42:42,0,54:..	0/0:24:24,0:50:0,75,749:..	0/0:23:23,0:50:0,78,779:..	0/0:17:17,0:48:0,63,629:..	0/0:16:16,0:48:0,63,629:..	0/0:22:22,0:48:0,66,659:..	0/0:18:18,0:50:0,69,689:..	0/0:18:18,0:50:0,54,539:..	0/0:23:23,0:48:0,84,839:..	seq2
chr7	65177199	chr7_65177199_C_T	C	T	45	AF=0.013889;AQ=45	GT:DP:AD:GQ:PL:RNC	0/0:21:21,0:50:0,63,629:..	0/0:20:20,0:50:0,60,599:..	0/0:23:23,0:50:0,72,719:..	0/0:31:31,0:50:0,96,959:..	0/0:20:20,0:30:0,30,539:..	0/0:19:19,0:50:0,63,629:..	0/0:18:18,0:50:0,54,539:..	0/0:21:21,0:50:0,63,629:..	0/0:27:27,0:50:0,81,809:..	0/0:23:23,0:50:0,69,689:..	0/0:17:17,0:50:0,54,539:..	0/0:23:23,0:50:0,72,719:..	0/0:23:23,0:50:0,69,689:..	0/0:26:26,0:50:0,78,779:..	0/0:22:22,0:50:0,66,659:..	0/0:19:19,0:50:0,57,569:..	0/0:19:19,0:50:0,57,569:..	0/0:23:23,0:50:0,72,719:..	0/0:15:15,0:45:0,45,449:..	0/0:12:12,0:36:0,36,359:..	0/0:16:16,0:48:0,51,509:..	0/0:27:27,0:50:0,84,839:..	0/0:27:27,0:50:0,81,809:..	0/0:21:21,0:50:0,63,629:..	0/0:32:32,0:50:0,99,989:..	0/0:27:27,0:50:0,84,839:..	0/0:27:27,0:50:0,51,749:..	0/0:21:21,0:50:0,63,629:..	0/0:17:17,0:50:0,54,539:..	0/0:27:27,0:50:0,81,809:..	0/0:38:38,0:50:0,114,1139:..	0/0:22:22,0:50:0,66,659:..	0/1:22:9,12:44:45,0,51:..	0/0:14:14,0:42:0,45,449:..	0/0:13:13,0:39:0,39,389:..	0/0:32:32,0:50:0,96,959:..	seq2
chr7	71578386	chr7_71578386_T_G	T	G	36	AF=0.013889;AQ=36	GT:DP:AD:GQ:PL:RNC	0/0:24:24,0:50:0,90,899:..	0/0:21:21,0:50:0,69,689:..	0/0:22:22,0:36:0,36,599:..	0/0:19:19,0:50:0,63,629:..	0/0:16:16,0:48:0,48,479:..	0/0:24:24,0:50:0,72,719:..	0/0:14:14,0:42:0,45,449:..	0/0:18:18,0:50:0,96,959:..	0/0:18:18,0:50:0,54,539:..	0/0:29:29,0:50:0,93,929:..	0/0:24:24,0:50:0,75,749:..	0/0:32:32,0:48:0,105,1049:..	0/0:20:20,0:50:0,69,689:..	0/0:24:24,0:50:0,90,899:..	0/0:25:25,0:50:0,105,1049:..	0/0:24:24,0:48:0,93,929:..	0/0:20:20,0:30:0,30,539:..	0/0:16:16,0:48:0,48,479:..	0/0:21:21,0:50:0,69,689:..	0/0:20:20,0:48:0,60,599:..	0/0:22:22,0:50:0,75,749:..	0/0:24:24,0:48:0,75,749:..	0/0:25:25,0:48:0,78,779:..	0/0:26:26,0:50:0,87,869:..	0/0:22:22,0:50:0,72,719:..	0/0:24:24,0:50:0,96,959:..	0/0:31:31,0:50:0,126,1259:..	0/0:19:19,0:48:0,72,719:..	0/1:21:11,10:36:36,0,55:..	0/0:19:19,0:48:0,90,899:..	0/0:27:27,0:50:0,105,1049:..	0/0:20:20,0:50:0,75,749:..	0/0:21:21,0:50:0,90,899:..	0/0:21:21,0:48:0,78,779:..	0/0:16:16,0:48:0,96,959:..	0/0:27:27,0:50:0,99,989:..	seq2
chr7	77318112	chr7_77318112_T_C	T	C	43	AF=0.013889;AQ=43	GT:DP:AD:GQ:PL:RNC	0/0:16:16,0:48:0,48,479:..	0/0:18:18,0:48:0,93,929:..	0/0:16:16,0:48:0,48,479:..	0/0:23:23,0:50:0,90,899:..	0/0:23:23,0:48:0,75,749:..	0/0:17:17,0:48:0,54,539:..	0/0:19:19,0:50:0,69,689:..	0/0:24:24,0:50:0,75,749:..	0/0:18:18,0:48:0,66,659:..	0/0:23:23,0:50:0,72,719:..	0/0:24:24,0:50:0,75,749:..	0/0:24:24,0:50:0,99,989:..	0/0:21:21,0:50:0,63,629:..	0/0:25:25,0:50:0,96,959:..	0/0:17:17,0:50:0,63,629:..	0/0:23:23,0:50:0,72,719:..	0/0:22:22,0:50:0,93,929:..	0/0:21:21,0:48:0,72,719:..	0/0:23:23,0:48:0,99,989:..	0/0:20:20,0:50:0,75,749:..	0/0:16:16,0:48:0,48,479:..	0/0:23:23,0:50:0,63,869:..	0/0:22:22,0:50:0,72,719:..	0/0:26:26,0:50:0,111,1109:..	0/0:16:16,0:48:0,57,569:..	0/0:21:21,0:50:0,69,689:..	0/1:26:12,14:43:43,0,56:..	0/0:12:12,0:36:0,39,389:..	0/0:16:16,0:48:0,48,479:..	0/0:21:21,0:48:0,78,779:..	0/0:19:19,0:50:0,63,629:..	0/0:21:21,0:48:0,75,749:..	0/0:25:25,0:50:0,96,959:..	0/0:25:25,0:48:0,93,929:..	0/0:26:26,0:48:0,87,869:..	0/0:18:18,0:48:0,93,929:..	seq2
chr7	77504025	chr7_77504025_G_A	G	A	49	AF=0.013889;AQ=49	GT:DP:AD:GQ:PL:RNC	0/0:21:21,0:50:0,87,869:..	0/0:22:22,0:50:0,87,869:..	0/0:23:23,0:48:0,81,809:..	0/0:20:20,0:50:0,69,689:..	0/0:26:26,0:50:0,78,779:..	0/0:27:27,0:50:0,81,809:..	0/1:25:11,14:48:49,0,57:..	0/0:21:21,0:48:0,75,749:..	0/0:25:25,0:50:0,87,869:..	0/0:24:24,0:50:0,96,959:..	0/0:17:17,0:48:0,69,689:..	0/0:20:20,0:48:0,78,779:..	0/0:17:17,0:50:0,87,869:..	0/0:26:26,0:50:0,93,929:..	0/0:24:24,0:48:0,72,719:..	0/0:22:22,0:50:0,90,899:..	0/0:20:20,0:48:0,78,779:..	0/0:18:18,0:50:0,54,539:..	0/0:16:16,0:48:0,72,719:..	0/0:25:25,0:50:0,81,809:..	0/0:24:24,0:50:0,81,809:..	0/0:29:29,0:50:0,99,989:..	0/0:20:20,0:50:0,60,599:..	0/0:20:20,0:50:0,66,659:..	0/0:21:21,0:48:0,90,899:..	0/0:19:19,0:50:0,96,959:..	0/0:25:25,0:48:0,96,959:..	0/0:22:22,0:50:0,81,809:..	0/0:23:23,0:48:0,114,1139:..	0/0:25:25,0:48:0,90,899:..	0/0:23:23,0:50:0,69,689:..	0/0:21:21,0:50:0,84,839:..	0/0:25:25,0:50:0,84,839:..	0/0:23:23,0:50:0,72,719:..	0/0:18:18,0:48:0,57,569:..	0/0:25:25,0:48:0,81,809:..	seq2
chr7	79521054	chr7_79521054_G_A	G	A	38	AF=0.013889;AQ=38	GT:DP:AD:GQ:PL:RNC	0/0:23:23,0:50:0,90,899:..	0/0:24:24,0:50:0,81,809:..	0/0:25:25,0:50:0,102,1019:..	0/0:27:27,0:50:0,114,1139:..	0/0:20:20,0:48:0,96,959:..	0/1:29:16,13:38:38,0,53:..	0/0:17:17,0:50:0,75,749:..	0/0:17:17,0:50:0,99,989:..	0/0:21:21,0:48:0,66,659:..	0/0:22:22,0:48:0,87,869:..	0/0:20:20,0:48:0,60,599:..	0/0:25:25,0:48:0,84,839:..	0/0:24:24,0:48:0,90,899:..	0/0:28:28,0:50:0,141,1409:..	0/0:25:25,0:50:0,90,899:..	0/0:16:16,0:48:0,72,719:..	0/0:23:23,0:50:0,108,1079:..	0/0:22:22,0:48:0,84,839:..	0/0:22:22,0:50:0,72,719:..	0/0:22:22,0:50:0,111,1109:..	0/0:20:20,0:50:0,69,689:..	0/0:24:24,0:50:0,75,749:..	0/0:26:26,0:50:0,102,1019:..	0/0:22:22,0:50:0,90,899:..	0/0:23:23,0:50:0,111,1109:..	0/0:24:24,0:50:0,96,959:..	0/0:20:20,0:50:0,141,1409:..	0/0:24:24,0:50:0,75,749:..	0/0:24:24,0:50:0,105,1049:..	0/0:23:23,0:48:0,84,839:..	0/0:20:20,0:48:0,90,899:..	0/0:22:22,0:48:0,90,899:..	0/0:22:22,0:50:0,78,779:..	0/0:25:25,0:50:0,108,1079:..	0/0:20:20,0:50:0,69,689:..	0/0:25:25,0:50:0,120,1199:..	seq2
chr7	82211020	chr7_82211020_C_T	C	T	48	AF=0.013889;AQ=48	GT:DP:AD:GQ:PL:RNC	0/0:20:20,0:50:0,102,1019:..	0/0:18:18,0:50:0,87,869:..	0/0:22:22,0:48:0,84,839:..	0/0:17:17,0:50:0,57,569:..	0/0:17:17,0:48:0,60,599:..	0/0:16:16,0:48:0,66,659:..	0/0:17:17,0:50:0,57,569:..	0/0:27:27,0:50:0,87,869:..	0/0:17:17,0:50:0,111,1109:..	0/0:24:24,0:50:0,78,779:..	0/0:17:17,0:50:0,66,659:..	0/0:22:22,0:50:0,66,659:..	0/0:24:24,0:50:0,93,929:..	0/0:26:26,0:50:0,93,929:..	0/0:22:22,0:50:0,72,719:..	0/0:19:19,0:50:0,60,599:..	0/0:32:32,0:50:0,99,989:..	0/0:16:16,0:48:0,60,599:..	0/0:18:18,0:50:0,57,569:..	0/0:21:21,0:50:0,72,719:..	0/0:24:24,0:50:0,84,839:..	0/0:21:21,0:48:0,99,989:..	0/0:22:22,0:50:0,66,659:..	0/0:19:19,0:50:0,75,749:..	0/0:21:21,0:50:0,69,689:..	0/0:24:24,0:50:0,90,899:..	0/0:25:25,0:48:0,99,989:..	0/0:20:20,0:50:0,69,689:..	0/0:22:22,0:48:0,75,749:..	0/0:17:17,0:50:0,60,599:..	0/0:21:21,0:50:0,69,689:..	0/0:11:11,0:33:0,33,329:..	0/1:30:12,18:47:48,0,54:..	0/0:16:16,0:48:0,72,719:..	0/0:16:16,0:48:0,93,929:..	0/0:21:21,0:50:0,69,689:..	seq2
chr7	84450676	chr7_84450676_C_A	C	A	39	AF=0.013889;AQ=39	GT:DP:AD:GQ:PL:RNC	0/0:14:14,0:42:0,45,449:..	0/0:16:16,0:48:0,48,479:..	0/0:20:20,0:50:0,60,599:..	0/0:25:25,0:50:0,102,1019:..	0/0:23:23,0:50:0,72,719:..	0/0:23:23,0:50:0,93,929:..	0/0:21:21,0:50:0,72,719:..	0/0:23:23,0:48:0,90,899:..	0/0:16:16,0:48:0,60,599:..	0/0:23:23,0:48:0,75,749:..	0/0:22:22,0:50:0,66,659:..	0/0:24:24,0:48:0,72,719:..	0/0:20:20,0:50:0,99,989:..	0/0:23:23,0:50:0,72,719:..	0/0:23:23,0:48:0,93,929:..	0/0:23:23,0:50:0,90,899:..	0/0:24:24,0:50:0,111,1109:..	0/0:21:21,0:48:0,81,809:..	0/0:21:21,0:50:0,87,869:..	0/0:16:16,0:48:0,105,1049:..	0/0:19:19,0:50:0,135,1349:..	0/0:26:26,0:48:0,93,929:..	0/0:18:18,0:50:0,96,959:..	0/0:27:27,0:50:0,96,959:..	0/0:21:21,0:50:0,75,749:..	0/0:22:22,0:50:0,75,749:..	0/0:24:24,0:50:0,138,1379:..	0/0:19:19,0:48:0,90,899:..	0/1:25:13,12:39:39,0,54:..	0/0:24:24,0:50:0,72,719:..	0/0:21:21,0:50:0,66,659:..	0/0:22:22,0:50:0,78,779:..	0/0:23:23,0:50:0,96,959:..	0/0:17:17,0:50:0,51,509:..	0/0:20:20,0:48:0,72,719:..	0/0:24:24,0:50:0,90,899:..	seq2
chr7	89215860	chr7_89215860_G_A	G	A	36	AF=0.013889;AQ=36	GT:DP:AD:GQ:PL:RNC	0/0:23:23,0:48:0,90,899:..	0/0:16:16,0:48:0,48,479:..	0/0:20:20,0:50:0,81,809:..	0/0:25:25,0:48:0,78,779:..	0/0:21:21,0:48:0,69,689:..	0/0:18:18,0:50:0,57,569:..	0/0:22:22,0:48:0,69,689:..	0/0:24:24,0:50:0,75,749:..	0/0:16:16,0:48:0,75,749:..	0/0:25:25,0:48:0,57,809:..	0/0:20:20,0:50:0,72,719:..	0/0:16:16,0:48:0,75,749:..	0/1:25:14,11:37:36,0,51:..	0/0:16:16,0:48:0,54,779:..	0/0:21:21,0:48:0,69,689:..	0/0:24:24,0:50:0,72,719:..	0/0:25:25,0:48:0,75,749:..	0/0:21:21,0:50:0,66,659:..	0/0:22:22,0:48:0,75,749:..	0/0:20:20,0:50:0,90,899:..	0/0:18:18,0:50:0,60,599:..	0/0:24:24,0:50:0,72,719:..	0/0:20:20,0:48:0,72,719:..	0/0:22:22,0:50:0,81,809:..	0/0:18:18,0:50:0,87,869:..	0/0:18:18,0:50:0,54,539:..	0/0:23:23,0:50:0,117,1169:..	0/0:14:14,0:42:0,45,449:..	0/0:23:23,0:50:0,63,869:..	0/0:24:24,0:48:0,90,899:..	0/0:25:25,0:48:0,78,779:..	0/0:18:18,0:50:0,63,629:..	0/0:19:19,0:50:0,66,659:..	0/0:16:16,0:48:0,66,659:..	0/0:19:19,0:50:0,66,659:..	0/0:22:22,0:50:0,78,779:..	seq2
chr7	89658330	chr7_89658330_C_T	C	T	41	AF=0.013889;AQ=41	GT:DP:AD:GQ:PL:RNC	0/0:22:22,0:50:0,69,689:..	0/0:24:24,0:48:0,72,719:..	0/0:28:28,0:50:0,96,959:..	0/0:25:25,0:50:0,84,839:..	0/0:20:20,0:50:0,66,659:..	0/0:16:16,0:48:0,60,599:..	0/0:23:23,0:48:0,93,929:..	0/0:16:16,0:48:0,54,539:..	0/0:19:19,0:48:0,72,719:..	0/0:21:21,0:50:0,75,749:..	0/0:19:19,0:50:0,66,659:..	0/0:24:24,0:50:0,75,749:..	0/0:22:22,0:48:0,75,749:..	0/0:24:24,0:48:0,69,929:..	0/0:25:25,0:50:0,105,1049:..	0/0:22:22,0:48:0,75,749:..	0/0:25:25,0:50:0,78,779:..	0/0:24:24,0:50:0,72,719:..	0/0:25:25,0:50:0,93,929:..	0/0:21:21,0:50:0,66,659:..	0/0:22:22,0:48:0,69,689:..	0/0:21:21,0:50:0,63,629:..	0/0:24:24,0:48:0,75,749:..	0/0:24:24,0:50:0,120,1199:..	0/0:20:20,0:50:0,60,599:..	0/0:22:22,0:48:0,66,659:..	0/0:24:24,0:50:0,129,1289:..	0/0:18:18,0:50:0,57,569:..	0/0:16:16,0:48:0,93,929:..	0/0:22:22,0:50:0,87,869:..	0/0:29:29,0:50:0,87,869:..	0/0:25:25,0:48:0,75,749:..	0/0:16:16,0:48:0,60,599:..	0/0:26:26,0:50:0,81,809:..	0/1:24:15,9:41:41,0,57:..	0/0:27:27,0:50:0,93,929:..	seq2
chr7	91318116	chr7_91318116_T_G	T	G	35	AF=0.013889;AQ=35	GT:DP:AD:GQ:PL:RNC	0/0:22:22,0:48:0,72,719:..	0/0:22:22,0:48:0,81,809:..	0/0:17:17,0:50:0,66,659:..	0/0:24:24,0:50:0,78,779:..	0/0:22:22,0:50:0,69,689:..	0/1:23:12,11:35:35,0,50:..	0/0:20:20,0:50:0,75,749:..	0/0:24:24,0:48:0,93,929:..	0/0:25:25,0:48:0,81,809:..	0/0:22:22,0:50:0,66,659:..	0/0:19:19,0:50:0,60,599:..	0/0:23:23,0:48:0,84,839:..	0/0:19:19,0:48:0,63,629:..	0/0:22:22,0:50:0,72,719:..	0/0:20:20,0:50:0,96,959:..	0/0:19:19,0:48:0,75,749:..	0/0:20:20,0:50:0,69,689:..	0/0:19:19,0:48:0,96,959:..	0/0:17:17,0:50:0,60,599:..	0/0:22:22,0:50:0,105,1049:..	0/0:16:16,0:48:0,60,599:..	0/0:24:24,0:48:0,123,1229:..	0/0:17:17,0:50:0,51,509:..	0/0:25:25,0:48:0,126,1259:..	0/0:19:19,0:50:0,63,629:..	0/0:23:23,0:50:0,75,749:..	0/0:20:20,0:50:0,66,659:..	0/0:24:24,0:48:0,96,959:..	0/0:25:25,0:48:0,84,839:..	0/0:25:25,0:50:0,111,1109:..	0/0:16:16,0:48:0,75,749:..	0/0:27:27,0:50:0,93,929:..	0/0:23:23,0:50:0,102,1019:..	0/0:22:22,0:50:0,69,689:..	0/0:22:22,0:50:0,69,689:..	0/0:24:24,0:48:0,78,779:..	seq2
chr7	93018808	chr7_93018808_C_T	C	T	40	AF=0.013889;AQ=40	GT:DP:AD:GQ:PL:RNC	0/0:22:22,0:50:0,69,689:..	0/0:16:16,0:48:0,48,479:..	0/0:24:24,0:50:0,72,719:..	0/0:24:24,0:48:0,132,1319:..	0/0:25:25,0:50:0,81,809:..	0/0:25:25,0:50:0,111,1109:..	0/0:20:20,0:50:0,63,629:..	0/0:16:16,0:48:0,60,599:..	0/0:21:21,0:48:0,63,629:..	0/0:24:24,0:50:0,75,749:..	0/0:24:24,0:50:0,72,719:..	0/0:26:26,0:50:0,99,989:..	0/1:27:17,10:40:40,0,55:..	0/0:23:23,0:50:0,69,689:..	0/0:23:23,0:50:0,75,749:..	0/0:24:24,0:50:0,75,749:..	0/0:27:27,0:48:0,111,1109:..	0/0:23:23,0:48:0,78,779:..	0/0:18:18,0:50:0,69,689:..	0/0:20:20,0:50:0,69,689:..	0/0:21:21,0:50:0,69,689:..	0/0:25:25,0:50:0,75,749:..	0/0:22:22,0:50:0,66,659:..	0/0:23:23,0:50:0,69,689:..	0/0:22:22,0:50:0,66,659:..	0/0:24:24,0:50:0,78,779:..	0/0:22:22,0:48:0,105,1049:..	0/0:26:26,0:50:0,90,899:..	0/0:23:23,0:48:0,90,899:..	0/0:25:25,0:50:0,99,989:..	0/0:31:31,0:50:0,93,929:..	0/0:24:24,0:50:0,90,899:..	0/0:23:23,0:48:0,75,749:..	0/0:22:22,0:50:0,123,1229:..	0/0:24:24,0:48:0,75,749:..	0/0:18:18,0:50:0,60,599:..	seq2
chr7	95188723	chr7_95188723_G_A	G	A	28	AF=0.013889;AQ=28	GT:DP:AD:GQ:PL:RNC	0/0:25:25,0:50:0,87,869:..	0/0:16:16,0:48:0,72,719:..	0/0:24:24,0:48:0,75,749:..	0/0:16:16,0:48:0,57,569:..	0/0:20:20,0:48:0,72,719:..	0/0:22:22,0:48:0,75,749:..	0/0:17:17,0:48:0,72,719:..	0/0:20:20,0:48:0,78,779:..	0/1:23:15,7:28:28,0,49:..	0/0:16:16,0:48:0,75,749:..	0/0:24:24,0:48:0,72,719:..	0/0:23:23,0:50:0,72,719:..	0/0:20:20,0:50:0,75,749:..	0/0:18:18,0:48:0,66,659:..	0/0:19:19,0:50:0,99,989:..	0/0:24:24,0:48:0,75,749:..	0/0:19:19,0:50:0,99,989:..	0/0:22:22,0:50:0,66,659:..	0/0:23:23,0:48:0,69,689:..	0/0:20:20,0:48:0,63,629:..	0/0:20:20,0:50:0,69,689:..	0/0:25:25,0:50:0,108,1079:..	0/0:19:19,0:48:0,75,749:..	0/0:24:24,0:48:0,75,749:..	0/0:24:24,0:50:0,72,719:..	0/0:19:19,0:50:0,66,659:..	0/0:19:19,0:50:0,75,749:..	0/0:17:17,0:50:0,75,749:..	0/0:18:18,0:50:0,75,749:..	0/0:21:21,0:48:0,63,629:..	0/0:17:17,0:50:0,102,1019:..	0/0:16:16,0:48:0,57,569:..	0/0:24:24,0:48:0,87,869:..	0/0:19:19,0:48:0,63,629:..	0/0:17:17,0:50:0,63,629:..	0/0:23:23,0:50:0,69,689:..	seq2
chr7	113092118	chr7_113092118_G_A	G	A	39	AF=0.013889;AQ=39	GT:DP:AD:GQ:PL:RNC	0/0:22:22,0:50:0,75,749:..	0/0:24:24,0:50:0,96,959:..	0/0:26:26,0:50:0,96,959:..	0/0:23:23,0:50:0,78,779:..	0/0:26:26,0:50:0,87,869:..	0/0:27:27,0:50:0,87,1109:..	0/0:21:21,0:48:0,66,659:..	0/0:23:23,0:50:0,72,719:..	0/0:21:21,0:48:0,78,779:..	0/0:16:16,0:48:0,72,719:..	0/0:23:23,0:48:0,69,689:..	0/0:24:24,0:50:0,102,1019:..	0/0:28:28,0:50:0,87,869:..	0/0:27:27,0:50:0,78,1019:..	0/0:23:23,0:50:0,90,899:..	0/0:25:25,0:48:0,90,899:..	0/0:25:25,0:50:0,84,839:..	0/0:23:23,0:48:0,48,719:..	0/0:16:16,0:48:0,81,809:..	0/0:24:24,0:50:0,72,719:..	0/0:17:17,0:50:0,51,509:..	0/0:30:30,0:50:0,105,1049:..	0/1:22:13,9:39:39,0,56:..	0/0:30:30,0:50:0,108,1079:..	0/0:26:26,0:48:0,90,899:..	0/0:23:23,0:50:0,75,749:..	0/0:24:24,0:48:0,81,809:..	0/0:18:18,0:50:0,72,719:..	0/0:22:22,0:50:0,105,1049:..	0/0:16:16,0:48:0,63,629:..	0/0:24:24,0:48:0,99,989:..	0/0:19:19,0:50:0,81,809:..	0/0:20:20,0:50:0,72,719:..	0/0:16:16,0:48:0,84,839:..	0/0:16:16,0:48:0,60,599:..	0/0:24:24,0:50:0,84,839:..	seq2
chr7	113623146	chr7_113623146_C_T	C	T	34	AF=0.013889;AQ=34	GT:DP:AD:GQ:PL:RNC	0/0:26:26,0:50:0,99,989:..	0/0:16:16,0:48:0,48,479:..	0/0:21:21,0:48:0,75,749:..	0/0:28:28,0:50:0,99,989:..	0/0:23:23,0:48:0,75,749:..	0/0:20:20,0:50:0,66,659:..	0/0:24:24,0:48:0,72,719:..	0/0:20:20,0:50:0,60,599:..	0/0:22:22,0:50:0,69,689:..	0/0:19:19,0:50:0,57,569:..	0/0:27:27,0:50:0,93,929:..	0/0:24:24,0:50:0,72,719:..	0/0:27:27,0:50:0,99,989:..	0/0:26:26,0:50:0,87,869:..	0/0:25:25,0:48:0,75,749:..	0/0:21:21,0:50:0,66,659:..	0/0:30:30,0:50:0,114,1139:..	0/0:16:16,0:48:0,60,599:..	0/0:20:20,0:50:0,69,689:..	0/0:21:21,0:48:0,72,719:..	0/0:25:25,0:48:0,102,1019:..	0/1:28:17,11:35:34,0,51:..	0/0:25:25,0:50:0,99,989:..	0/0:31:31,0:50:0,114,1139:..	0/0:24:24,0:48:0,72,719:..	0/0:26:26,0:50:0,84,839:..	0/0:22:22,0:50:0,99,989:..	0/0:24:24,0:48:0,72,719:..	0/0:19:19,0:50:0,87,869:..	0/0:19:19,0:48:0,78,779:..	0/0:21:21,0:50:0,63,629:..	0/0:24:24,0:50:0,75,749:..	0/0:16:16,0:48:0,63,629:..	0/0:22:22,0:50:0,72,719:..	0/0:17:17,0:50:0,51,509:..	0/0:26:26,0:50:0,87,869:..	seq2
chr7	118990255	chr7_118990255_C_T	C	T	36	AF=0.013889;AQ=36	GT:DP:AD:GQ:PL:RNC	0/0:12:12,0:36:0,39,389:..	0/0:20:20,0:50:0,66,659:..	0/0:24:24,0:48:0,75,749:..	0/0:25:25,0:50:0,75,749:..	0/0:26:26,0:50:0,63,869:..	0/0:25:25,0:50:0,78,779:..	0/0:19:19,0:50:0,57,569:..	0/0:17:17,0:50:0,51,509:..	0/0:16:16,0:48:0,48,479:..	0/0:22:22,0:50:0,84,839:..	0/0:20:20,0:50:0,81,809:..	0/0:24:24,0:50:0,84,839:..	0/0:19:19,0:50:0,60,599:..	0/0:17:17,0:50:0,63,629:..	0/0:24:24,0:48:0,93,929:..	0/0:18:18,0:50:0,69,689:..	0/0:22:22,0:48:0,72,719:..	0/0:16:16,0:48:0,48,479:..	0/0:16:16,0:48:0,48,479:..	0/1:28:16,12:36:36,0,51:..	0/0:21:21,0:50:0,96,959:..	0/0:24:24,0:48:0,102,1019:..	0/0:19:19,0:48:0,90,899:..	0/0:21:21,0:50:0,63,629:..	0/0:19:19,0:50:0,66,659:..	0/0:19:19,0:50:0,66,659:..	0/0:16:16,0:48:0,48,479:..	0/0:16:16,0:48:0,48,479:..	0/0:23:23,0:48:0,96,959:..	0/0:24:24,0:50:0,72,719:..	0/0:24:24,0:50:0,99,989:..	0/0:19:19,0:50:0,57,569:..	0/0:21:21,0:48:0,63,629:..	0/0:21:21,0:33:0,33,569:..	0/0:25:25,0:48:0,75,749:..	0/0:22:22,0:48:0,69,689:..	seq2
chr7	120800032	chr7_120800032_G_A	G	A	42	AF=0.013889;AQ=42	GT:DP:AD:GQ:PL:RNC	0/0:25:25,0:50:0,78,779:..	0/0:23:23,0:50:0,78,779:..	0/0:18:18,0:50:0,87,869:..	0/0:25:25,0:48:0,87,869:..	0/0:25:25,0:50:0,81,809:..	0/1:19:9,10:42:42,0,53:..	0/0:14:14,0:42:0,42,419:..	0/0:19:19,0:50:0,63,629:..	0/0:23:23,0:48:0,75,749:..	0/0:24:24,0:50:0,96,959:..	0/0:20:20,0:50:0,96,959:..	0/0:27:27,0:50:0,84,839:..	0/0:21:21,0:50:0,96,959:..	0/0:23:23,0:50:0,96,959:..	0/0:22:22,0:50:0,105,1049:..	0/0:24:24,0:48:0,48,719:..	0/0:20:20,0:50:0,69,689:..	0/0:17:17,0:48:0,75,749:..	0/0:25:25,0:48:0,90,899:..	0/0:19:19,0:50:0,72,719:..	0/0:20:20,0:50:0,60,599:..	0/0:25:25,0:50:0,114,1139:..	0/0:21:21,0:50:0,93,929:..	0/0:22:22,0:50:0,99,989:..	0/0:21:21,0:50:0,75,749:..	0/0:16:16,0:48:0,51,509:..	0/0:23:23,0:50:0,141,1409:..	0/0:19:19,0:50:0,69,689:..	0/0:23:23,0:39:0,39,629:..	0/0:22:22,0:50:0,96,959:..	0/0:25:25,0:50:0,78,779:..	0/0:20:20,0:50:0,63,629:..	0/0:24:24,0:48:0,108,1079:..	0/0:22:22,0:50:0,78,779:..	0/0:17:17,0:48:0,96,959:..	0/0:20:20,0:50:0,60,599:..	seq2
chr7	127897265	chr7_127897265_C_T	C	T	18	AF=0.013889;AQ=18	GT:DP:AD:GQ:PL:RNC	0/0:22:22,0:48:0,81,809:..	0/0:21:21,0:48:0,75,749:..	0/0:22:22,0:50:0,69,689:..	0/0:23:23,0:48:0,93,1169:..	0/0:25:25,0:48:0,90,1139:..	0/0:33:33,0:50:0,105,1049:..	0/0:24:24,0:50:0,72,719:..	0/0:16:16,0:48:0,48,479:..	0/0:12:12,0:36:0,36,359:..	0/0:26:26,0:50:0,123,1229:..	0/0:27:27,0:50:0,105,1049:..	0/0:23:23,0:50:0,132,1319:..	0/0:22:22,0:48:0,99,989:..	0/1:20:14,6:18:18,0,40:..	0/0:24:24,0:50:0,84,839:..	0/0:22:22,0:50:0,114,1139:..	0/0:20:20,0:50:0,96,959:..	0/0:18:18,0:50:0,60,599:..	0/0:24:24,0:48:0,72,719:..	0/0:17:17,0:50:0,54,539:..	0/0:19:19,0:50:0,90,899:..	0/0:24:24,0:48:0,78,1019:..	0/0:21:21,0:48:0,99,989:..	0/0:26:26,0:50:0,129,1289:..	0/0:16:16,0:48:0,48,479:..	0/0:21:21,0:48:0,84,839:..	0/0:18:18,0:48:0,66,659:..	0/0:24:24,0:50:0,84,839:..	0/0:25:25,0:50:0,84,839:..	0/0:17:17,0:50:0,51,509:..	0/0:24:24,0:48:0,96,959:..	0/0:25:25,0:50:0,90,899:..	0/0:18:18,0:48:0,96,959:..	0/0:17:17,0:50:0,72,719:..	0/0:27:27,0:50:0,96,959:..	0/0:22:22,0:48:0,99,989:..	seq2
chr7	139360885	chr7_139360885_C_A	C	A	20	AF=0.013889;AQ=20	GT:DP:AD:GQ:PL:RNC	0/0:16:16,0:48:0,48,479:..	0/0:11:11,0:33:0,33,329:..	0/0:9:9,0:27:0,27,269:..	0/0:20:20,0:30:0,30,539:..	0/0:16:16,0:48:0,51,509:..	0/0:11:11,0:33:0,33,329:..	0/0:10:10,0:3:0,3,269:..	0/0:16:16,0:18:0,18,419:..	0/0:12:12,0:36:0,36,359:..	0/0:19:19,0:50:0,60,599:..	0/0:14:14,0:42:0,42,419:..	0/0:17:17,0:21:0,21,449:..	0/0:12:12,0:36:0,36,359:..	0/0:17:17,0:50:0,51,509:..	0/0:17:17,0:50:0,54,539:..	0/0:9:9,0:27:0,27,269:..	0/0:13:13,0:39:0,39,389:..	0/0:13:13,0:39:0,39,389:..	0/0:14:14,0:0:17,0,317:II	0/0:16:16,0:48:0,48,479:..	0/0:18:18,0:50:0,54,539:..	0/0:11:11,0:33:0,33,329:..	0/0:10:10,0:30:0,30,299:..	0/0:17:17,0:21:0,24,479:..	0/0:6:6,0:18:0,18,179:..	0/0:11:11,0:33:0,33,329:..	0/0:17:17,0:50:0,51,509:..	0/0:9:9,0:1:2,0,212:II	0/0:14:14,0:42:0,42,419:..	0/0:9:9,0:27:0,30,299:..	0/0:16:16,0:48:0,48,479:..	0/0:11:11,0:33:0,33,329:..	0/1:13:7,4:20:20,0,39:..	0/0:12:12,0:36:0,36,359:..	0/0:15:15,0:45:0,45,449:..	0/0:9:9,0:27:0,27,269:..	seq2
chr7	141533827	chr7_141533827_C_A	C	A	39	AF=0.013889;AQ=39	GT:DP:AD:GQ:PL:RNC	0/0:20:20,0:48:0,105,1049:..	0/0:25:25,0:48:0,90,899:..	0/0:27:27,0:50:0,93,929:..	0/0:21:21,0:50:0,90,899:..	0/0:20:20,0:48:0,93,929:..	0/0:24:24,0:50:0,75,749:..	0/0:22:22,0:50:0,66,659:..	0/0:24:24,0:42:0,42,659:..	0/0:20:20,0:50:0,63,629:..	0/0:30:30,0:50:0,99,989:..	0/0:24:24,0:50:0,72,719:..	0/0:23:23,0:50:0,69,689:..	0/0:21:21,0:50:0,72,719:..	0/0:18:18,0:50:0,60,599:..	0/0:25:25,0:48:0,117,1169:..	0/0:25:25,0:45:0,45,689:..	0/0:19:19,0:50:0,66,659:..	0/0:25:25,0:48:0,75,749:..	0/0:16:16,0:48:0,51,509:..	0/0:17:17,0:50:0,75,749:..	0/0:21:21,0:50:0,63,629:..	0/0:21:21,0:50:0,93,929:..	0/1:21:10,11:39:39,0,51:..	0/0:27:27,0:50:0,81,809:..	0/0:23:23,0:48:0,75,749:..	0/0:23:23,0:50:0,72,719:..	0/0:24:24,0:50:0,75,749:..	0/0:25:25,0:48:0,102,1019:..	0/0:17:17,0:50:0,72,719:..	0/0:23:23,0:50:0,69,689:..	0/0:26:26,0:48:0,78,779:..	0/0:17:17,0:50:0,78,779:..	0/0:25:25,0:50:0,75,749:..	0/0:24:24,0:48:0,75,749:..	0/0:18:18,0:48:0,72,719:..	0/0:27:27,0:50:0,120,1199:..	seq2
chr7	144112142	chr7_144112142_T_G	T	G	38	AF=0.013889;AQ=38	GT:DP:AD:GQ:PL:RNC	0/0:25:25,0:50:0,117,1169:..	0/0:26:26,0:50:0,78,779:..	0/0:18:18,0:50:0,75,749:..	0/0:17:17,0:48:0,60,599:..	0/0:24:24,0:50:0,99,989:..	0/0:21:21,0:50:0,63,629:..	0/0:22:22,0:50:0,66,659:..	0/0:23:23,0:50:0,75,749:..	0/0:24:24,0:48:0,72,719:..	0/0:21:21,0:50:0,72,719:..	0/0:29:29,0:50:0,126,1259:..	0/0:29:29,0:50:0,108,1079:..	0/0:19:19,0:48:0,75,749:..	0/0:20:20,0:50:0,69,689:..	0/0:26:26,0:50:0,99,989:..	0/0:23:23,0:50:0,99,989:..	0/0:23:23,0:50:0,72,719:..	0/0:20:20,0:50:0,63,629:..	0/0:22:22,0:50:0,81,809:..	0/0:20:20,0:50:0,111,1109:..	0/0:26:26,0:50:0,102,1019:..	0/0:22:22,0:50:0,120,1199:..	0/0:16:16,0:48:0,48,479:..	0/0:20:20,0:50:0,75,749:..	0/0:21:21,0:50:0,69,689:..	0/0:24:24,0:50:0,90,899:..	0/0:22:22,0:50:0,78,779:..	0/0:22:22,0:48:0,66,659:..	0/0:25:25,0:48:0,75,749:..	0/0:17:17,0:50:0,69,689:..	0/0:22:22,0:48:0,123,1229:..	0/0:21:21,0:48:0,66,659:..	0/1:25:14,11:39:38,0,54:..	0/0:13:13,0:39:0,39,389:..	0/0:22:22,0:50:0,69,689:..	0/0:17:17,0:50:0,57,569:..	seq2
chr8	5242962	chr8_5242962_G_A	G	A	40	AF=0.013889;AQ=40	GT:DP:AD:GQ:PL:RNC	0/0:18:18,0:50:0,69,689:..	0/0:22:22,0:50:0,69,689:..	0/0:22:22,0:48:0,75,749:..	0/0:21:21,0:50:0,63,629:..	0/0:24:24,0:50:0,75,749:..	0/0:24:24,0:48:0,75,749:..	0/0:24:24,0:48:0,72,719:..	0/0:21:21,0:50:0,69,689:..	0/0:26:26,0:48:0,78,779:..	0/0:26:26,0:48:0,78,779:..	0/0:20:20,0:30:0,30,539:..	0/0:18:18,0:50:0,54,539:..	0/0:19:19,0:48:0,66,659:..	0/0:16:16,0:48:0,57,569:..	0/0:25:25,0:48:0,78,779:..	0/0:17:17,0:50:0,75,749:..	0/0:27:27,0:50:0,105,1049:..	0/0:23:23,0:50:0,72,719:..	0/0:22:22,0:36:0,36,599:..	0/0:23:23,0:50:0,69,689:..	0/0:23:23,0:50:0,72,719:..	0/0:20:20,0:50:0,66,659:..	0/0:19:19,0:50:0,72,719:..	0/0:31:31,0:50:0,102,1019:..	0/0:24:24,0:48:0,72,719:..	0/0:22:22,0:50:0,72,719:..	0/0:19:19,0:50:0,60,599:..	0/0:16:16,0:48:0,48,479:..	0/0:21:21,0:50:0,75,749:..	0/0:16:16,0:48:0,48,479:..	0/0:21:21,0:50:0,63,629:..	0/0:20:20,0:48:0,69,689:..	0/0:25:25,0:45:0,45,689:..	0/0:19:19,0:50:0,57,569:..	0/1:21:9,12:40:40,0,51:..	0/0:28:28,0:48:0,84,839:..	seq2
chr8	18641208	chr8_18641208_G_T	G	T	38	AF=0.013889;AQ=38	GT:DP:AD:GQ:PL:RNC	0/0:16:16,0:48:0,51,509:..	0/0:14:14,0:42:0,45,449:..	0/0:14:14,0:42:0,42,419:..	0/0:16:16,0:48:0,48,479:..	0/0:15:15,0:45:0,45,449:..	0/0:17:17,0:50:0,51,509:..	0/0:24:24,0:50:0,72,719:..	0/0:23:23,0:50:0,69,689:..	0/0:14:14,0:42:0,42,419:..	0/0:17:17,0:50:0,51,509:..	0/0:12:12,0:36:0,36,359:..	0/1:19:10,9:38:38,0,50:..	0/0:17:17,0:50:0,51,509:..	0/0:15:15,0:45:0,45,449:..	0/0:20:20,0:50:0,60,599:..	0/0:16:16,0:48:0,54,539:..	0/0:15:15,0:45:0,45,449:..	0/0:12:12,0:36:0,36,359:..	0/0:16:16,0:48:0,48,479:..	0/0:22:22,0:50:0,66,659:..	0/0:18:18,0:50:0,60,599:..	0/0:21:21,0:50:0,63,629:..	0/0:19:19,0:50:0,57,569:..	0/0:21:21,0:50:0,63,629:..	0/0:7:7,0:21:0,21,209:..	0/0:16:16,0:48:0,48,479:..	0/0:21:21,0:50:0,63,629:..	0/0:19:19,0:50:0,57,569:..	0/0:24:24,0:50:0,75,749:..	0/0:12:12,0:36:0,36,359:..	0/0:17:17,0:50:0,57,569:..	0/0:14:14,0:42:0,42,419:..	0/0:11:11,0:33:0,33,329:..	0/0:17:17,0:50:0,54,539:..	0/0:18:18,0:50:0,54,539:..	0/0:21:21,0:50:0,69,689:..	seq2
chr8	25027953	chr8_25027953_G_A	G	A	36	AF=0.013889;AQ=36	GT:DP:AD:GQ:PL:RNC	0/0:21:21,0:48:0,111,1109:..	0/0:22:22,0:50:0,72,719:..	0/0:25:25,0:50:0,75,749:..	0/0:24:24,0:50:0,78,779:..	0/0:26:26,0:50:0,75,989:..	0/0:22:22,0:48:0,72,719:..	0/0:24:24,0:50:0,72,719:..	0/0:20:20,0:50:0,60,599:..	0/0:22:22,0:50:0,69,689:..	0/0:26:26,0:50:0,78,779:..	0/0:24:24,0:50:0,72,719:..	0/0:22:22,0:48:0,69,689:..	0/0:22:22,0:50:0,72,719:..	0/0:19:19,0:50:0,66,659:..	0/0:22:22,0:50:0,78,779:..	0/0:16:16,0:48:0,48,479:..	0/0:24:24,0:50:0,75,749:..	0/0:20:20,0:50:0,60,599:..	0/0:27:27,0:50:0,102,1019:..	0/0:20:20,0:48:0,72,719:..	0/0:24:24,0:50:0,75,749:..	0/0:25:25,0:48:0,87,869:..	0/0:20:20,0:50:0,63,629:..	0/0:19:19,0:50:0,57,569:..	0/0:19:19,0:50:0,63,629:..	0/0:20:20,0:50:0,72,719:..	0/0:31:31,0:50:0,99,989:..	0/1:27:15,12:37:36,0,51:..	0/0:25:25,0:50:0,99,989:..	0/0:24:24,0:50:0,72,719:..	0/0:25:25,0:50:0,78,779:..	0/0:22:22,0:50:0,66,659:..	0/0:20:20,0:48:0,69,689:..	0/0:22:22,0:48:0,102,1019:..	0/0:28:28,0:50:0,87,869:..	0/0:20:20,0:50:0,69,689:..	seq2
chr8	31311525	chr8_31311525_A_C	A	C	39	AF=0.013889;AQ=39	GT:DP:AD:GQ:PL:RNC	0/0:23:23,0:48:0,69,689:..	0/0:17:17,0:50:0,51,509:..	0/0:24:24,0:50:0,99,989:..	0/0:18:18,0:48:0,69,689:..	0/0:29:29,0:48:0,105,1049:..	0/0:21:21,0:48:0,69,689:..	0/0:16:16,0:48:0,48,479:..	0/0:25:25,0:50:0,75,749:..	0/0:24:24,0:48:0,75,749:..	0/0:19:19,0:48:0,69,689:..	0/0:21:21,0:50:0,66,659:..	0/0:23:23,0:50:0,90,899:..	0/0:23:23,0:48:0,69,929:..	0/0:22:22,0:50:0,72,719:..	0/1:40:21,19:39:39,0,52:..	0/0:17:17,0:50:0,51,509:..	0/0:21:21,0:50:0,93,929:..	0/0:17:17,0:50:0,90,899:..	0/0:25:25,0:50:0,75,749:..	0/0:21:21,0:48:0,78,779:..	0/0:22:22,0:48:0,66,659:..	0/0:22:22,0:50:0,75,749:..	0/0:25:25,0:50:0,75,749:..	0/0:21:21,0:50:0,75,749:..	0/0:21:21,0:50:0,63,629:..	0/0:25:25,0:50:0,75,749:..	0/0:23:23,0:50:0,75,749:..	0/0:23:23,0:50:0,72,719:..	0/0:23:23,0:50:0,75,749:..	0/0:17:17,0:50:0,72,719:..	0/0:25:25,0:48:0,78,779:..	0/0:18:18,0:48:0,81,809:..	0/0:21:21,0:50:0,75,749:..	0/0:16:16,0:48:0,69,689:..	0/0:23:23,0:50:0,93,929:..	0/0:17:17,0:50:0,60,599:..	seq2
chr8	31522287	chr8_31522287_A_T	A	T	48	AF=0.013889;AQ=48	GT:DP:AD:GQ:PL:RNC	0/0:9:9,0:27:0,27,269:..	0/0:16:16,0:48:0,48,479:..	0/0:16:16,0:48:0,48,479:..	0/0:20:20,0:50:0,60,599:..	0/0:20:20,0:50:0,60,599:..	0/0:17:17,0:50:0,60,599:..	0/0:12:12,0:36:0,36,359:..	0/0:16:16,0:48:0,48,479:..	0/0:19:19,0:50:0,60,599:..	0/0:16:16,0:48:0,51,509:..	0/1:26:10,16:47:48,0,51:..	0/0:16:16,0:48:0,48,479:..	0/0:17:17,0:50:0,57,569:..	0/0:16:16,0:48:0,48,479:..	0/0:16:16,0:48:0,48,479:..	0/0:16:16,0:48:0,48,479:..	0/0:16:16,0:48:0,48,479:..	0/0:18:18,0:50:0,54,539:..	0/0:16:16,0:48:0,48,479:..	0/0:13:13,0:39:0,39,389:..	0/0:16:16,0:48:0,48,479:..	0/0:25:25,0:50:0,75,749:..	0/0:16:16,0:48:0,48,479:..	0/0:17:17,0:50:0,51,509:..	0/0:16:16,0:48:0,48,479:..	0/0:16:16,0:48:0,48,479:..	0/0:16:16,0:48:0,48,479:..	0/0:17:17,0:50:0,51,509:..	0/0:16:16,0:48:0,48,479:..	0/0:16:16,0:48:0,48,479:..	0/0:25:25,0:48:0,75,749:..	0/0:16:16,0:48:0,48,479:..	0/0:16:16,0:48:0,48,479:..	0/0:17:17,0:50:0,51,509:..	0/0:17:17,0:50:0,54,539:..	0/0:14:14,0:42:0,42,419:..	seq2
chr8	32968847	chr8_32968847_C_T	C	T	31	AF=0.013889;AQ=31	GT:DP:AD:GQ:PL:RNC	0/0:18:18,0:50:0,57,569:..	0/0:25:25,0:50:0,99,989:..	0/0:16:16,0:48:0,48,479:..	0/0:16:16,0:48:0,63,629:..	0/0:21:21,0:50:0,75,749:..	0/0:23:23,0:48:0,72,719:..	0/0:18:18,0:48:0,111,1109:..	0/0:31:31,0:50:0,96,959:..	0/0:16:16,0:48:0,66,659:..	0/0:16:16,0:48:0,75,749:..	0/0:19:19,0:50:0,72,719:..	0/0:25:25,0:48:0,111,1109:..	0/0:21:21,0:50:0,63,629:..	0/0:20:20,0:50:0,69,929:..	0/0:23:23,0:48:0,90,899:..	0/1:25:16,9:31:31,0,51:..	0/0:24:24,0:50:0,72,719:..	0/0:23:23,0:50:0,75,749:..	0/0:22:22,0:50:0,81,809:..	0/0:24:24,0:50:0,93,929:..	0/0:21:21,0:48:0,69,689:..	0/0:24:24,0:48:0,78,779:..	0/0:21:21,0:50:0,72,719:..	0/0:19:19,0:48:0,72,719:..	0/0:20:20,0:48:0,72,719:..	0/0:22:22,0:50:0,66,659:..	0/0:22:22,0:50:0,66,659:..	0/0:23:23,0:50:0,72,719:..	0/0:20:20,0:50:0,78,779:..	0/0:24:24,0:48:0,72,719:..	0/0:25:25,0:50:0,75,749:..	0/0:25:25,0:48:0,75,749:..	0/0:23:23,0:48:0,69,689:..	0/0:23:23,0:50:0,75,749:..	0/0:21:21,0:50:0,66,659:..	0/0:16:16,0:48:0,48,479:..	seq2
chr8	39420407	chr8_39420407_A_G	A	G	39	AF=0.013889;AQ=39	GT:DP:AD:GQ:PL:RNC	0/0:23:23,0:50:0,69,689:..	0/0:23:23,0:48:0,69,689:..	0/0:19:19,0:50:0,57,569:..	0/0:22:22,0:50:0,75,749:..	0/0:22:22,0:48:0,93,929:..	0/0:23:23,0:50:0,75,749:..	0/0:19:19,0:50:0,93,929:..	0/0:18:18,0:50:0,60,599:..	0/0:22:22,0:50:0,78,779:..	0/0:26:26,0:50:0,78,779:..	0/0:19:19,0:50:0,69,689:..	0/0:20:20,0:50:0,66,659:..	0/0:23:23,0:48:0,123,1229:..	0/0:23:23,0:48:0,72,719:..	0/0:22:22,0:48:0,111,1109:..	0/0:21:21,0:48:0,75,749:..	0/0:25:25,0:50:0,105,1049:..	0/0:25:25,0:48:0,78,779:..	0/0:22:22,0:50:0,69,689:..	0/0:31:31,0:50:0,96,959:..	0/1:27:14,13:39:39,0,54:..	0/0:26:26,0:50:0,108,1079:..	0/0:19:19,0:50:0,57,569:..	0/0:30:30,0:50:0,90,899:..	0/0:21:21,0:50:0,63,629:..	0/0:24:24,0:48:0,96,959:..	0/0:18:18,0:50:0,54,539:..	0/0:22:22,0:48:0,81,809:..	0/0:24:24,0:50:0,72,719:..	0/0:24:24,0:50:0,72,719:..	0/0:31:31,0:48:0,99,989:..	0/0:18:18,0:50:0,54,539:..	0/0:12:12,0:36:0,39,389:..	0/0:22:22,0:50:0,66,659:..	0/0:18:18,0:50:0,66,659:..	0/0:23:23,0:39:0,39,629:..	seq2
chr8	45864339	chr8_45864339_C_T	C	T	49	AF=0.013889;AQ=49	GT:DP:AD:GQ:PL:RNC	0/0:16:16,0:48:0,48,479:..	0/0:16:16,0:48:0,51,509:..	0/0:16:16,0:48:0,78,779:..	0/0:23:23,0:48:0,75,749:..	0/0:21:21,0:50:0,78,779:..	0/0:21:21,0:50:0,99,989:..	0/0:19:19,0:48:0,120,1199:..	0/0:25:25,0:50:0,78,779:..	0/0:20:20,0:48:0,63,629:..	0/0:28:28,0:50:0,93,929:..	0/0:18:18,0:48:0,63,629:..	0/0:22:22,0:48:0,123,1229:..	0/0:24:24,0:50:0,126,1259:..	0/0:21:21,0:50:0,63,629:..	0/0:24:24,0:48:0,78,779:..	0/0:21:21,0:48:0,66,659:..	0/0:25:25,0:50:0,75,749:..	0/0:22:22,0:50:0,84,839:..	0/0:22:22,0:48:0,66,659:..	0/0:25:25,0:48:0,75,749:..	0/0:18:18,0:50:0,60,599:..	0/1:32:13,19:47:49,0,51:..	0/0:21:21,0:50:0,69,689:..	0/0:23:23,0:50:0,96,959:..	0/0:25:25,0:50:0,87,869:..	0/0:17:17,0:48:0,51,509:..	0/0:23:23,0:50:0,87,869:..	0/0:20:20,0:50:0,69,689:..	0/0:21:21,0:50:0,69,689:..	0/0:18:18,0:50:0,66,659:..	0/0:23:23,0:50:0,96,959:..	0/0:16:16,0:48:0,48,479:..	0/0:24:24,0:48:0,87,869:..	0/0:22:22,0:48:0,78,779:..	0/0:23:23,0:50:0,69,689:..	0/0:22:22,0:48:0,81,809:..	seq2
chr8	60002218	chr8_60002218_A_G	A	G	41	AF=0.013889;AQ=41	GT:DP:AD:GQ:PL:RNC	0/0:18:18,0:50:0,81,809:..	0/0:16:16,0:48:0,75,749:..	0/0:25:25,0:48:0,75,749:..	0/0:15:15,0:45:0,45,449:..	0/0:21:21,0:50:0,84,839:..	0/0:16:16,0:48:0,75,749:..	0/0:17:17,0:48:0,90,899:..	0/0:25:25,0:50:0,75,749:..	0/0:16:16,0:48:0,48,479:..	0/0:22:22,0:50:0,66,659:..	0/0:23:23,0:50:0,72,719:..	0/0:23:23,0:50:0,69,689:..	0/0:21:21,0:50:0,66,659:..	0/0:23:23,0:48:0,75,749:..	0/0:18:18,0:50:0,63,629:..	0/0:22:22,0:48:0,75,749:..	0/0:21:21,0:50:0,63,629:..	0/0:19:19,0:50:0,90,899:..	0/0:18:18,0:50:0,75,749:..	0/0:14:14,0:42:0,45,449:..	0/0:19:19,0:50:0,60,599:..	0/1:34:15,19:40:41,0,45:..	0/0:22:22,0:48:0,75,749:..	0/0:23:23,0:48:0,99,989:..	0/0:24:24,0:42:0,42,659:..	0/0:20:20,0:48:0,90,899:..	0/0:26:26,0:50:0,90,899:..	0/0:24:24,0:48:0,72,719:..	0/0:24:24,0:48:0,75,749:..	0/0:25:25,0:50:0,81,1049:..	0/0:21:21,0:50:0,84,839:..	0/0:16:16,0:48:0,48,479:..	0/0:19:19,0:27:0,27,509:..	0/0:21:21,0:48:0,84,839:..	0/0:16:16,0:48:0,69,689:..	0/0:24:24,0:50:0,78,779:..	seq2
chr8	63890882	chr8_63890882_C_G	C	G	36	AF=0.013889;AQ=36	GT:DP:AD:GQ:PL:RNC	0/0:18:18,0:48:0,69,689:..	0/0:16:16,0:48:0,60,599:..	0/0:20:20,0:50:0,93,929:..	0/0:19:19,0:50:0,75,749:..	0/0:23:23,0:50:0,69,689:..	0/0:22:22,0:50:0,69,689:..	0/0:16:16,0:48:0,75,749:..	0/0:18:18,0:50:0,72,719:..	0/0:22:22,0:50:0,72,719:..	0/0:21:21,0:50:0,69,689:..	0/0:21:21,0:48:0,63,629:..	0/0:18:18,0:50:0,72,719:..	0/0:19:19,0:50:0,63,629:..	0/0:24:24,0:48:0,72,719:..	0/0:18:18,0:50:0,69,689:..	0/0:20:20,0:50:0,69,689:..	0/0:23:23,0:50:0,69,689:..	0/0:20:20,0:50:0,63,629:..	0/0:23:23,0:50:0,69,689:..	0/0:21:21,0:50:0,69,689:..	0/0:23:23,0:50:0,69,689:..	0/0:20:20,0:48:0,66,659:..	0/0:20:20,0:48:0,75,749:..	0/0:22:22,0:50:0,105,1049:..	0/0:17:17,0:48:0,69,689:..	0/0:25:25,0:50:0,96,959:..	0/0:25:25,0:48:0,75,749:..	0/0:24:24,0:50:0,72,719:..	0/0:16:16,0:48:0,69,689:..	0/0:20:20,0:50:0,63,629:..	0/0:24:24,0:50:0,75,749:..	0/0:21:21,0:50:0,72,719:..	0/0:20:20,0:48:0,102,1019:..	0/0:17:17,0:48:0,60,599:..	0/0:26:26,0:50:0,99,989:..	0/1:33:19,14:36:36,0,51:..	seq2
chr8	77240103	chr8_77240103_C_A	C	A	41	AF=0.013889;AQ=41	GT:DP:AD:GQ:PL:RNC	0/0:22:22,0:50:0,96,959:..	0/0:22:22,0:50:0,90,899:..	0/0:16:16,0:48:0,54,539:..	0/0:16:16,0:48:0,69,689:..	0/0:19:19,0:50:0,57,569:..	0/0:26:26,0:48:0,96,959:..	0/0:16:16,0:48:0,57,569:..	0/0:23:23,0:50:0,72,719:..	0/0:18:18,0:50:0,60,599:..	0/0:24:24,0:50:0,120,1199:..	0/0:19:19,0:50:0,66,659:..	0/0:22:22,0:48:0,81,809:..	0/0:16:16,0:48:0,105,1049:..	0/0:25:25,0:50:0,84,839:..	0/0:22:22,0:50:0,99,989:..	0/0:19:19,0:50:0,93,929:..	0/0:21:21,0:50:0,69,689:..	0/0:17:17,0:50:0,57,569:..	0/0:22:22,0:50:0,90,899:..	0/0:17:17,0:48:0,69,689:..	0/0:26:26,0:50:0,87,869:..	0/0:25:25,0:50:0,108,1079:..	0/0:24:24,0:50:0,90,899:..	0/0:23:23,0:50:0,90,899:..	0/0:16:16,0:48:0,72,719:..	0/0:21:21,0:50:0,72,719:..	0/1:41:18,23:40:41,0,48:..	0/0:21:21,0:50:0,66,659:..	0/0:24:24,0:48:0,90,899:..	0/0:24:24,0:50:0,81,809:..	0/0:26:26,0:50:0,84,839:..	0/0:18:18,0:50:0,75,749:..	0/0:17:17,0:50:0,69,689:..	0/0:24:24,0:48:0,75,749:..	0/0:19:19,0:50:0,57,569:..	0/0:21:21,0:48:0,75,749:..	seq2
chr8	80222117	chr8_80222117_C_T	C	T	41	AF=0.013889;AQ=41	GT:DP:AD:GQ:PL:RNC	0/0:23:23,0:50:0,69,689:..	0/0:16:16,0:18:0,18,419:..	0/0:17:17,0:50:0,60,599:..	0/0:20:20,0:50:0,63,629:..	0/0:25:25,0:50:0,87,869:..	0/0:18:18,0:50:0,60,599:..	0/0:22:22,0:48:0,108,1079:..	0/0:18:18,0:50:0,69,689:..	0/0:22:22,0:48:0,75,749:..	0/1:40:19,21:41:41,0,50:..	0/0:18:18,0:48:0,72,719:..	0/0:23:23,0:50:0,69,689:..	0/0:24:24,0:50:0,72,719:..	0/0:16:16,0:48:0,54,539:..	0/0:24:24,0:50:0,51,749:..	0/0:19:19,0:50:0,90,899:..	0/0:23:23,0:39:0,39,629:..	0/0:20:20,0:50:0,72,719:..	0/0:23:23,0:50:0,84,839:..	0/0:22:22,0:48:0,84,839:..	0/0:23:23,0:48:0,96,959:..	0/0:23:23,0:50:0,69,689:..	0/0:23:23,0:48:0,69,689:..	0/0:20:20,0:48:0,78,779:..	0/0:22:22,0:50:0,75,749:..	0/0:21:21,0:50:0,84,839:..	0/0:25:25,0:50:0,129,1289:..	0/0:20:20,0:50:0,75,749:..	0/0:18:18,0:50:0,60,599:..	0/0:20:20,0:48:0,63,629:..	0/0:16:16,0:48:0,93,929:..	0/0:20:20,0:48:0,66,659:..	0/0:20:20,0:50:0,69,689:..	0/0:17:17,0:48:0,99,989:..	0/0:21:21,0:50:0,72,719:..	0/0:20:20,0:48:0,78,779:..	seq2
chr8	83158588	chr8_83158588_C_T	C	T	37	AF=0.013889;AQ=37	GT:DP:AD:GQ:PL:RNC	0/0:21:21,0:50:0,84,839:..	0/0:20:20,0:48:0,72,719:..	0/0:23:23,0:50:0,72,719:..	0/0:18:18,0:50:0,75,749:..	0/0:18:18,0:50:0,63,629:..	0/0:25:25,0:50:0,75,749:..	0/0:17:17,0:50:0,51,509:..	0/0:24:24,0:48:0,72,719:..	0/0:15:15,0:45:0,45,449:..	0/0:20:20,0:48:0,78,779:..	0/0:36:36,0:48:0,111,1109:..	0/0:18:18,0:50:0,60,599:..	0/0:18:18,0:50:0,54,539:..	0/0:28:28,0:50:0,99,989:..	0/0:30:30,0:50:0,99,989:..	0/0:33:33,0:48:0,102,1019:..	0/0:27:27,0:50:0,99,989:..	0/0:22:22,0:50:0,66,659:..	0/0:23:23,0:50:0,75,749:..	0/0:22:22,0:36:0,36,599:..	0/0:24:24,0:48:0,99,989:..	0/0:32:32,0:48:0,48,959:..	0/0:24:24,0:50:0,72,719:..	0/0:24:24,0:48:0,72,719:..	0/0:21:21,0:50:0,69,689:..	0/0:32:32,0:50:0,108,1079:..	0/1:36:21,15:37:37,0,53:..	0/0:29:29,0:50:0,117,1169:..	0/0:20:20,0:48:0,78,779:..	0/0:18:18,0:50:0,69,689:..	0/0:25:25,0:48:0,90,899:..	0/0:19:19,0:48:0,75,749:..	0/0:25:25,0:48:0,75,749:..	0/0:18:18,0:50:0,51,749:..	0/0:24:24,0:50:0,75,749:..	0/0:24:24,0:50:0,87,869:..	seq2
chr8	88933973	chr8_88933973_T_C	T	C	46	AF=0.013889;AQ=46	GT:DP:AD:GQ:PL:RNC	0/0:26:26,0:50:0,78,779:..	0/0:17:17,0:50:0,69,689:..	0/0:18:18,0:50:0,63,629:..	0/0:25:25,0:50:0,99,989:..	0/0:29:29,0:50:0,60,839:..	0/0:19:19,0:50:0,75,749:..	0/0:25:25,0:50:0,90,899:..	0/0:25:25,0:50:0,75,749:..	0/0:18:18,0:50:0,57,569:..	0/0:25:25,0:48:0,75,749:..	0/0:19:19,0:50:0,99,989:..	0/0:25:25,0:50:0,60,839:..	0/0:19:19,0:50:0,69,689:..	0/0:22:22,0:50:0,75,749:..	0/0:28:28,0:50:0,87,869:..	0/0:24:24,0:50:0,75,749:..	0/0:17:17,0:50:0,63,629:..	0/0:20:20,0:48:0,69,689:..	0/0:20:20,0:50:0,60,599:..	0/0:28:28,0:50:0,132,1319:..	0/0:18:18,0:50:0,54,539:..	0/0:25:25,0:50:0,78,779:..	0/0:24:24,0:50:0,87,869:..	0/0:24:24,0:48:0,75,749:..	0/0:27:27,0:50:0,102,1019:..	0/1:28:9,19:44:46,0,48:..	0/0:27:27,0:50:0,84,839:..	0/0:27:27,0:50:0,87,869:..	0/0:29:29,0:50:0,93,929:..	0/0:20:20,0:50:0,69,689:..	0/0:23:23,0:50:0,69,689:..	0/0:21:21,0:50:0,66,659:..	0/0:21:21,0:50:0,63,629:..	0/0:32:32,0:50:0,102,1019:..	0/0:23:23,0:50:0,75,749:..	0/0:31:31,0:50:0,93,929:..	seq2
chr8	96681521	chr8_96681521_C_T	C	T	32	AF=0.013889;AQ=32	GT:DP:AD:GQ:PL:RNC	0/0:18:18,0:48:0,60,599:..	0/0:17:17,0:50:0,69,689:..	0/0:25:25,0:50:0,54,779:..	0/0:25:25,0:48:0,96,959:..	0/0:24:24,0:50:0,96,959:..	0/0:26:26,0:48:0,48,719:..	0/0:25:25,0:50:0,75,749:..	0/0:19:19,0:48:0,75,749:..	0/0:18:18,0:48:0,69,689:..	0/0:22:22,0:50:0,72,719:..	0/0:14:14,0:42:0,45,449:..	0/1:33:21,12:32:32,0,52:..	0/0:17:17,0:50:0,51,509:..	0/0:19:19,0:48:0,75,749:..	0/0:29:29,0:48:0,114,1139:..	0/0:22:22,0:48:0,105,1049:..	0/0:18:18,0:50:0,81,809:..	0/0:24:24,0:50:0,69,929:..	0/0:22:22,0:50:0,78,779:..	0/0:31:31,0:50:0,102,1019:..	0/0:25:25,0:48:0,105,1049:..	0/0:19:19,0:50:0,105,1049:..	0/0:24:24,0:50:0,78,779:..	0/0:24:24,0:50:0,72,719:..	0/0:17:17,0:50:0,72,719:..	0/0:23:23,0:48:0,69,689:..	0/0:25:25,0:48:0,96,959:..	0/0:24:24,0:50:0,72,719:..	0/0:24:24,0:50:0,90,899:..	0/0:24:24,0:48:0,96,959:..	0/0:24:24,0:50:0,75,749:..	0/0:16:16,0:48:0,60,599:..	0/0:30:30,0:50:0,102,1019:..	0/0:24:24,0:50:0,72,719:..	0/0:19:19,0:48:0,57,569:..	0/0:23:23,0:48:0,93,929:..	seq2
chr8	100075539	chr8_100075539_G_C	G	C	40	AF=0.013889;AQ=40	GT:DP:AD:GQ:PL:RNC	0/0:23:23,0:50:0,69,689:..	0/0:23:23,0:48:0,78,779:..	0/0:28:28,0:50:0,87,869:..	0/0:25:25,0:48:0,75,749:..	0/0:23:23,0:50:0,69,689:..	0/1:25:11,14:40:40,0,55:..	0/0:21:21,0:50:0,66,659:..	0/0:22:22,0:50:0,66,659:..	0/0:23:23,0:50:0,75,749:..	0/0:20:20,0:50:0,63,629:..	0/0:25:25,0:50:0,75,749:..	0/0:22:22,0:50:0,72,719:..	0/0:17:17,0:50:0,66,659:..	0/0:32:32,0:50:0,99,989:..	0/0:24:24,0:50:0,78,779:..	0/0:23:23,0:48:0,69,689:..	0/0:20:20,0:50:0,60,599:..	0/0:21:21,0:50:0,75,749:..	0/0:25:25,0:50:0,75,749:..	0/0:12:12,0:36:0,39,389:..	0/0:22:22,0:50:0,69,689:..	0/0:29:29,0:50:0,90,899:..	0/0:20:20,0:50:0,60,599:..	0/0:22:22,0:50:0,72,719:..	0/0:13:13,0:39:0,39,389:..	0/0:24:24,0:50:0,72,719:..	0/0:21:21,0:50:0,72,719:..	0/0:24:24,0:48:0,72,719:..	0/0:14:14,0:42:0,42,419:..	0/0:22:22,0:50:0,69,689:..	0/0:29:29,0:50:0,87,869:..	0/0:19:19,0:50:0,57,569:..	0/0:23:23,0:50:0,75,749:..	0/0:23:23,0:50:0,72,719:..	0/0:23:23,0:48:0,102,1019:..	0/0:28:28,0:50:0,87,869:..	seq2
chr8	101400585	chr8_101400585_G_A	G	A	41	AF=0.013889;AQ=41	GT:DP:AD:GQ:PL:RNC	0/0:18:18,0:50:0,63,629:..	0/0:22:22,0:50:0,72,959:..	0/0:19:19,0:50:0,87,869:..	0/0:20:20,0:48:0,72,719:..	0/0:16:16,0:48:0,48,479:..	0/0:16:16,0:48:0,48,479:..	0/0:17:17,0:50:0,51,509:..	0/0:20:20,0:50:0,63,629:..	0/0:20:20,0:50:0,66,659:..	0/0:19:19,0:50:0,69,689:..	0/0:16:16,0:48:0,54,539:..	0/0:18:18,0:50:0,72,719:..	0/0:18:18,0:50:0,57,569:..	0/0:21:21,0:50:0,66,659:..	0/0:17:17,0:48:0,96,959:..	0/0:16:16,0:48:0,54,539:..	0/0:19:19,0:50:0,57,569:..	0/0:19:19,0:50:0,63,629:..	0/0:21:21,0:50:0,63,629:..	0/0:23:23,0:50:0,72,719:..	0/0:23:23,0:39:0,39,629:..	0/0:16:16,0:48:0,51,509:..	0/0:24:24,0:50:0,72,719:..	0/0:22:22,0:50:0,72,719:..	0/0:21:21,0:50:0,69,929:..	0/0:25:25,0:45:0,45,689:..	0/0:22:22,0:50:0,72,719:..	0/0:23:23,0:50:0,75,749:..	0/0:16:16,0:48:0,57,569:..	0/0:17:17,0:50:0,66,659:..	0/0:23:23,0:48:0,78,779:..	0/0:16:16,0:48:0,60,599:..	0/0:19:19,0:48:0,81,809:..	0/0:16:16,0:48:0,48,479:..	0/0:16:16,0:48:0,60,599:..	0/1:22:11,11:42:41,0,55:..	seq2
chr8	110419053	chr8_110419053_G_A	G	A	23	AF=0.013889;AQ=23	GT:DP:AD:GQ:PL:RNC	0/0:23:23,0:50:0,75,749:..	0/0:26:26,0:48:0,102,1019:..	0/0:20:20,0:50:0,66,659:..	0/0:25:25,0:50:0,99,989:..	0/0:23:23,0:48:0,69,689:..	0/0:16:16,0:48:0,48,479:..	0/1:29:21,8:24:23,0,49:..	0/0:20:20,0:50:0,60,599:..	0/0:14:14,0:42:0,45,449:..	0/0:20:20,0:50:0,63,629:..	0/0:30:30,0:50:0,108,1079:..	0/0:28:28,0:50:0,84,839:..	0/0:22:22,0:50:0,75,749:..	0/0:21:21,0:50:0,66,659:..	0/0:25:25,0:50:0,87,869:..	0/0:29:29,0:50:0,90,899:..	0/0:24:24,0:50:0,75,749:..	0/0:21:21,0:48:0,87,869:..	0/0:19:19,0:50:0,93,929:..	0/0:27:27,0:50:0,90,899:..	0/0:18:18,0:50:0,72,719:..	0/0:29:29,0:50:0,123,1229:..	0/0:19:19,0:50:0,87,869:..	0/0:20:20,0:50:0,75,749:..	0/0:16:16,0:48:0,48,479:..	0/0:24:24,0:48:0,72,719:..	0/0:23:23,0:50:0,87,869:..	0/0:18:18,0:50:0,63,629:..	0/0:15:15,0:45:0,45,449:..	0/0:23:23,0:50:0,72,719:..	0/0:28:28,0:50:0,96,959:..	0/0:16:16,0:48:0,48,479:..	0/0:25:25,0:50:0,75,749:..	0/0:20:20,0:48:0,93,929:..	0/0:20:20,0:50:0,60,599:..	0/0:22:22,0:50:0,69,689:..	seq2
chr8	115347285	chr8_115347285_C_A	C	A	36	AF=0.013889;AQ=36	GT:DP:AD:GQ:PL:RNC	0/0:16:16,0:48:0,54,539:..	0/0:20:20,0:48:0,108,1079:..	0/0:22:22,0:48:0,66,659:..	0/0:24:24,0:48:0,96,959:..	0/0:16:16,0:48:0,48,479:..	0/0:23:23,0:48:0,72,719:..	0/0:23:23,0:48:0,72,719:..	0/0:22:22,0:50:0,78,779:..	0/0:12:12,0:36:0,36,359:..	0/0:16:16,0:48:0,60,599:..	0/0:21:21,0:48:0,93,929:..	0/0:29:29,0:50:0,105,1049:..	0/0:23:23,0:48:0,90,899:..	0/0:24:24,0:48:0,72,719:..	0/0:23:23,0:50:0,72,719:..	0/0:22:22,0:48:0,69,689:..	0/0:22:22,0:48:0,87,869:..	0/0:20:20,0:50:0,75,749:..	0/0:16:16,0:48:0,66,659:..	0/0:20:20,0:48:0,69,689:..	0/0:19:19,0:50:0,57,569:..	0/0:23:23,0:50:0,84,839:..	0/0:16:16,0:48:0,48,479:..	0/0:25:25,0:50:0,75,749:..	0/0:21:21,0:48:0,63,629:..	0/1:27:17,10:37:36,0,54:..	0/0:20:20,0:50:0,87,869:..	0/0:20:20,0:48:0,63,629:..	0/0:22:22,0:48:0,66,659:..	0/0:21:21,0:50:0,66,659:..	0/0:21:21,0:48:0,69,689:..	0/0:16:16,0:48:0,48,479:..	0/0:19:19,0:50:0,63,629:..	0/0:16:16,0:48:0,75,749:..	0/0:24:24,0:50:0,72,719:..	0/0:21:21,0:50:0,93,929:..	seq2
chr8	117139617	chr8_117139617_T_A	T	A	34	AF=0.013889;AQ=34	GT:DP:AD:GQ:PL:RNC	0/0:26:26,0:50:0,87,869:..	0/0:20:20,0:50:0,72,719:..	0/0:33:33,0:50:0,126,1259:..	0/0:16:16,0:48:0,48,479:..	0/0:24:24,0:48:0,72,719:..	0/0:24:24,0:48:0,90,899:..	0/0:22:22,0:48:0,72,719:..	0/0:20:20,0:48:0,66,659:..	0/0:22:22,0:50:0,66,659:..	0/0:30:30,0:50:0,72,959:..	0/0:22:22,0:50:0,72,719:..	0/0:23:23,0:50:0,69,689:..	0/0:20:20,0:48:0,72,719:..	0/0:22:22,0:50:0,114,1139:..	0/0:24:24,0:50:0,72,719:..	0/0:21:21,0:50:0,99,989:..	0/0:36:36,0:48:0,108,1079:..	0/0:25:25,0:48:0,75,749:..	0/0:21:21,0:33:0,33,569:..	0/0:31:31,0:50:0,93,929:..	0/1:17:11,6:34:34,0,53:..	0/0:41:41,0:50:0,123,1229:..	0/0:18:18,0:50:0,72,719:..	0/0:21:21,0:48:0,72,719:..	0/0:21:21,0:48:0,72,719:..	0/0:20:20,0:48:0,87,869:..	0/0:25:25,0:50:0,75,749:..	0/0:20:20,0:48:0,81,809:..	0/0:23:23,0:48:0,72,719:..	0/0:24:24,0:48:0,78,779:..	0/0:17:17,0:50:0,51,509:..	0/0:21:21,0:48:0,75,749:..	0/0:19:19,0:50:0,60,599:..	0/0:23:23,0:50:0,72,719:..	0/0:18:18,0:48:0,54,539:..	0/0:29:29,0:50:0,87,869:..	seq2
chr8	118634660	chr8_118634660_G_A	G	A	42	AF=0.013889;AQ=42	GT:DP:AD:GQ:PL:RNC	0/0:21:21,0:50:0,78,779:..	0/0:22:22,0:50:0,75,749:..	0/0:26:26,0:50:0,105,1049:..	0/0:21:21,0:48:0,72,719:..	0/0:21:21,0:50:0,69,689:..	0/0:24:24,0:50:0,72,719:..	0/0:21:21,0:48:0,84,839:..	0/0:18:18,0:24:0,24,479:..	0/0:21:21,0:50:0,72,719:..	0/0:23:23,0:50:0,72,719:..	0/0:17:17,0:50:0,57,569:..	0/0:21:21,0:48:0,66,659:..	0/0:22:22,0:48:0,69,689:..	0/0:25:25,0:50:0,117,1169:..	0/0:16:16,0:48:0,81,809:..	0/0:21:21,0:50:0,99,989:..	0/0:24:24,0:50:0,90,899:..	0/0:31:31,0:50:0,93,929:..	0/0:21:21,0:48:0,69,689:..	0/0:23:23,0:48:0,69,689:..	0/0:24:24,0:50:0,72,719:..	0/0:29:29,0:50:0,93,929:..	0/0:17:17,0:50:0,51,509:..	0/0:24:24,0:48:0,147,1469:..	0/0:24:24,0:48:0,105,1049:..	0/0:22:22,0:48:0,66,659:..	0/0:21:21,0:50:0,72,719:..	0/1:26:11,15:42:42,0,54:..	0/0:24:24,0:50:0,72,719:..	0/0:14:14,0:42:0,45,449:..	0/0:23:23,0:48:0,81,809:..	0/0:24:24,0:50:0,72,719:..	0/0:16:16,0:48:0,72,719:..	0/0:21:21,0:50:0,69,689:..	0/0:21:21,0:48:0,81,809:..	0/0:23:23,0:48:0,72,719:..	seq2
chr8	124105953	chr8_124105953_A_T	A	T	36	AF=0.013889;AQ=36	GT:DP:AD:GQ:PL:RNC	0/0:22:22,0:50:0,84,839:..	0/0:25:25,0:50:0,78,779:..	0/0:20:20,0:50:0,105,1049:..	0/0:23:23,0:50:0,69,689:..	0/0:19:19,0:50:0,63,629:..	0/0:18:18,0:50:0,63,629:..	0/0:16:16,0:48:0,66,659:..	0/0:18:18,0:48:0,75,749:..	0/0:19:19,0:27:0,27,509:..	0/0:23:23,0:48:0,87,869:..	0/0:25:25,0:45:0,45,689:..	0/0:27:27,0:50:0,96,959:..	0/0:16:16,0:48:0,48,479:..	0/0:23:23,0:50:0,90,899:..	0/0:30:30,0:50:0,99,989:..	0/0:23:23,0:48:0,72,719:..	0/1:38:18,20:36:36,0,51:..	0/0:16:16,0:48:0,48,479:..	0/0:25:25,0:50:0,84,839:..	0/0:22:22,0:36:0,36,599:..	0/0:22:22,0:48:0,72,719:..	0/0:28:28,0:50:0,90,899:..	0/0:16:16,0:48:0,51,509:..	0/0:23:23,0:50:0,72,719:..	0/0:27:27,0:50:0,81,809:..	0/0:16:16,0:48:0,54,539:..	0/0:20:20,0:50:0,75,749:..	0/0:21:21,0:48:0,66,659:..	0/0:22:22,0:48:0,66,659:..	0/0:20:20,0:48:0,75,749:..	0/0:16:16,0:48:0,48,479:..	0/0:16:16,0:48:0,54,539:..	0/0:22:22,0:50:0,66,659:..	0/0:23:23,0:50:0,69,689:..	0/0:23:23,0:50:0,72,719:..	0/0:20:20,0:48:0,69,689:..	seq2
chr9	7150210	chr9_7150210_T_C	T	C	36	AF=0.013889;AQ=36	GT:DP:AD:GQ:PL:RNC	0/0:18:18,0:48:0,90,899:..	0/0:16:16,0:48:0,90,899:..	0/0:21:21,0:48:0,102,1019:..	0/0:21:21,0:48:0,63,629:..	0/0:21:21,0:48:0,72,719:..	0/0:26:26,0:50:0,90,899:..	0/0:19:19,0:50:0,60,599:..	0/0:16:16,0:48:0,51,509:..	0/0:23:23,0:50:0,69,689:..	0/0:25:25,0:48:0,81,809:..	0/0:21:21,0:50:0,72,719:..	0/0:23:23,0:50:0,72,719:..	0/0:24:24,0:48:0,72,719:..	0/0:24:24,0:50:0,93,929:..	0/0:22:22,0:50:0,96,959:..	0/0:17:17,0:48:0,78,779:..	0/0:28:28,0:48:0,93,929:..	0/0:16:16,0:48:0,66,659:..	0/0:12:12,0:36:0,39,389:..	0/0:23:23,0:48:0,78,779:..	0/0:20:20,0:50:0,72,719:..	0/0:17:17,0:50:0,132,1319:..	0/0:22:22,0:48:0,96,959:..	0/0:20:20,0:50:0,66,659:..	0/0:23:23,0:50:0,87,869:..	0/1:25:14,11:36:36,0,53:..	0/0:22:22,0:48:0,72,719:..	0/0:20:20,0:50:0,60,599:..	0/0:24:24,0:50:0,111,1109:..	0/0:21:21,0:50:0,72,719:..	0/0:22:22,0:48:0,72,719:..	0/0:19:19,0:48:0,69,689:..	0/0:25:25,0:48:0,90,899:..	0/0:19:19,0:48:0,111,1109:..	0/0:16:16,0:48:0,93,929:..	0/0:29:29,0:50:0,90,899:..	seq2
chr9	18643732	chr9_18643732_G_A	G	A	38	AF=0.013889;AQ=38	GT:DP:AD:GQ:PL:RNC	0/0:23:23,0:48:0,75,749:..	0/0:26:26,0:50:0,84,839:..	0/0:25:25,0:48:0,84,839:..	0/0:24:24,0:50:0,75,749:..	0/0:23:23,0:39:0,39,629:..	0/0:25:25,0:50:0,75,749:..	0/0:23:23,0:50:0,72,719:..	0/0:24:24,0:50:0,72,719:..	0/0:16:16,0:48:0,48,479:..	0/0:16:16,0:48:0,75,749:..	0/0:24:24,0:48:0,87,869:..	0/0:23:23,0:50:0,72,719:..	0/0:22:22,0:50:0,75,749:..	0/0:23:23,0:50:0,72,719:..	0/0:25:25,0:50:0,75,749:..	0/1:25:13,12:38:38,0,50:..	0/0:21:21,0:48:0,72,719:..	0/0:22:22,0:50:0,69,689:..	0/0:19:19,0:48:0,57,569:..	0/0:22:22,0:50:0,78,779:..	0/0:25:25,0:50:0,75,749:..	0/0:30:30,0:50:0,72,959:..	0/0:24:24,0:48:0,72,719:..	0/0:22:22,0:50:0,90,899:..	0/0:24:24,0:50:0,72,719:..	0/0:23:23,0:48:0,66,899:..	0/0:30:30,0:50:0,105,1049:..	0/0:30:30,0:50:0,96,959:..	0/0:20:20,0:50:0,63,629:..	0/0:18:18,0:48:0,75,749:..	0/0:24:24,0:50:0,72,719:..	0/0:25:25,0:50:0,63,869:..	0/0:22:22,0:50:0,81,809:..	0/0:17:17,0:50:0,57,569:..	0/0:23:23,0:48:0,99,989:..	0/0:25:25,0:48:0,75,749:..	seq2
chr9	18676056	chr9_18676056_G_A	G	A	39	AF=0.013889;AQ=39	GT:DP:AD:GQ:PL:RNC	0/0:26:26,0:50:0,126,1259:..	0/0:20:20,0:50:0,69,689:..	0/0:21:21,0:50:0,90,899:..	0/0:20:20,0:48:0,60,599:..	0/0:23:23,0:50:0,93,929:..	0/0:21:21,0:48:0,99,989:..	0/0:16:16,0:48:0,54,539:..	0/0:21:21,0:50:0,66,659:..	0/0:21:21,0:48:0,84,839:..	0/0:23:23,0:48:0,102,1019:..	0/0:25:25,0:48:0,78,779:..	0/0:24:24,0:50:0,111,1109:..	0/0:21:21,0:50:0,69,689:..	0/0:25:25,0:48:0,99,989:..	0/0:25:25,0:50:0,57,809:..	0/0:24:24,0:50:0,72,719:..	0/0:26:26,0:50:0,54,779:..	0/0:23:23,0:50:0,93,929:..	0/0:19:19,0:48:0,75,749:..	0/0:22:22,0:50:0,72,719:..	0/0:16:16,0:48:0,66,659:..	0/0:24:24,0:48:0,93,929:..	0/1:30:16,14:39:39,0,55:..	0/0:25:25,0:50:0,84,839:..	0/0:22:22,0:48:0,75,749:..	0/0:22:22,0:50:0,66,659:..	0/0:22:22,0:50:0,93,929:..	0/0:18:18,0:50:0,66,899:..	0/0:21:21,0:50:0,66,659:..	0/0:19:19,0:50:0,63,629:..	0/0:21:21,0:50:0,63,629:..	0/0:19:19,0:50:0,75,749:..	0/0:19:19,0:50:0,63,629:..	0/0:25:25,0:50:0,93,929:..	0/0:24:24,0:50:0,66,899:..	0/0:18:18,0:48:0,93,929:..	seq2
chr9	24609019	chr9_24609019_G_T	G	T	47	AF=0.013889;AQ=47	GT:DP:AD:GQ:PL:RNC	0/0:25:25,0:50:0,99,989:..	0/0:31:31,0:50:0,93,929:..	0/0:24:24,0:48:0,90,899:..	0/0:28:28,0:50:0,87,869:..	0/0:21:21,0:50:0,72,719:..	0/0:22:22,0:50:0,72,719:..	0/0:25:25,0:50:0,75,749:..	0/0:30:30,0:50:0,93,929:..	0/0:30:30,0:50:0,90,899:..	0/0:26:26,0:50:0,81,809:..	0/0:24:24,0:48:0,75,749:..	0/0:21:21,0:50:0,63,629:..	0/0:25:25,0:45:0,45,689:..	0/0:23:23,0:50:0,72,719:..	0/0:33:33,0:50:0,99,989:..	0/0:25:25,0:50:0,84,839:..	0/0:27:27,0:50:0,102,1019:..	0/0:26:26,0:50:0,93,929:..	0/0:29:29,0:50:0,93,929:..	0/0:39:39,0:50:0,135,1349:..	0/0:25:25,0:48:0,90,899:..	0/0:30:30,0:50:0,96,959:..	0/0:23:23,0:48:0,102,1019:..	0/0:30:30,0:50:0,102,1019:..	0/0:32:32,0:50:0,96,959:..	0/1:38:13,25:43:47,0,44:..	0/0:23:23,0:50:0,75,749:..	0/0:18:18,0:50:0,54,539:..	0/0:27:27,0:50:0,51,749:..	0/0:23:23,0:50:0,78,779:..	0/0:24:24,0:50:0,81,809:..	0/0:34:34,0:50:0,105,1049:..	0/0:31:31,0:50:0,114,1139:..	0/0:32:32,0:50:0,105,1049:..	0/0:20:20,0:50:0,72,719:..	0/0:30:30,0:50:0,105,1049:..	seq2
chr9	26209084	chr9_26209084_C_G	C	G	10	AF=0.013889;AQ=10	GT:DP:AD:GQ:PL:RNC	0/0:22:22,0:50:0,99,989:..	0/0:19:19,0:48:0,84,839:..	0/0:23:23,0:50:0,78,779:..	0/0:25:25,0:50:0,75,749:..	0/1:22:18,4:11:10,0,39:..	0/0:18:18,0:48:0,54,539:..	0/0:23:23,0:48:0,78,779:..	0/0:15:15,0:45:0,45,449:..	0/0:19:19,0:50:0,66,659:..	0/0:23:23,0:50:0,87,869:..	0/0:19:19,0:50:0,87,869:..	0/0:23:23,0:48:0,78,779:..	0/0:17:17,0:50:0,69,689:..	0/0:20:20,0:50:0,126,1259:..	0/0:25:25,0:50:0,87,869:..	0/0:20:20,0:50:0,81,809:..	0/0:21:21,0:50:0,69,689:..	0/0:24:24,0:48:0,90,899:..	0/0:16:16,0:48:0,63,629:..	0/0:23:23,0:50:0,69,689:..	0/0:20:20,0:48:0,66,659:..	0/0:24:24,0:50:0,90,899:..	0/0:16:16,0:48:0,75,749:..	0/0:21:21,0:48:0,78,779:..	0/0:20:20,0:48:0,66,659:..	0/0:23:23,0:50:0,69,689:..	0/0:21:21,0:50:0,63,869:..	0/0:16:16,0:48:0,54,539:..	0/0:17:17,0:50:0,57,569:..	0/0:20:20,0:50:0,93,929:..	0/0:23:23,0:50:0,84,839:..	0/0:22:22,0:50:0,78,779:..	0/0:23:23,0:48:0,75,749:..	0/0:20:20,0:50:0,75,749:..	0/0:16:16,0:48:0,102,1019:..	0/0:25:25,0:50:0,75,749:..	seq2
chr9	32518123	chr9_32518123_C_A	C	A	24	AF=0.013889;AQ=24	GT:DP:AD:GQ:PL:RNC	0/0:14:14,0:42:0,42,419:..	0/0:11:11,0:33:0,33,329:..	0/0:12:12,0:36:0,39,389:..	0/0:11:11,0:33:0,33,329:..	0/0:16:16,0:48:0,51,509:..	0/0:13:13,0:9:0,9,329:..	0/0:16:16,0:48:0,48,479:..	0/0:14:14,0:42:0,42,419:..	0/1:21:14,7:24:24,0,43:..	0/0:13:13,0:39:0,39,389:..	0/0:16:16,0:48:0,51,509:..	0/0:12:12,0:36:0,36,359:..	0/0:10:10,0:30:0,30,299:..	0/0:11:11,0:33:0,33,329:..	0/0:14:14,0:42:0,42,419:..	0/0:12:12,0:7:0,6,299:..	0/0:17:17,0:50:0,54,539:..	0/0:12:12,0:36:0,39,389:..	0/0:16:16,0:48:0,48,479:..	0/0:12:12,0:36:0,39,389:..	0/0:9:9,0:27:0,27,269:..	0/0:14:14,0:42:0,45,449:..	0/0:11:11,0:33:0,33,329:..	0/0:20:20,0:50:0,66,659:..	0/0:18:18,0:24:0,24,479:..	0/0:15:15,0:15:0,15,389:..	0/0:16:16,0:48:0,48,479:..	0/0:9:9,0:27:0,27,269:..	0/0:16:16,0:48:0,51,509:..	0/0:14:14,0:42:0,42,419:..	0/0:17:17,0:21:0,21,449:..	0/0:11:11,0:33:0,33,329:..	0/0:10:10,0:30:0,30,299:..	0/0:17:17,0:21:0,21,449:..	0/0:10:10,0:3:0,0,239:..	0/0:12:12,0:36:0,36,359:..	seq2
chr9	33207798	chr9_33207798_A_C	A	C	39	AF=0.013889;AQ=39	GT:DP:AD:GQ:PL:RNC	0/0:24:24,0:48:0,72,719:..	0/0:20:20,0:50:0,69,689:..	0/0:20:20,0:48:0,78,779:..	0/0:19:19,0:48:0,75,749:..	0/0:17:17,0:48:0,60,599:..	0/0:22:22,0:50:0,66,659:..	0/0:16:16,0:48:0,57,569:..	0/0:20:20,0:50:0,99,989:..	0/0:19:19,0:50:0,60,599:..	0/0:25:25,0:50:0,75,749:..	0/0:20:20,0:30:0,30,539:..	0/0:26:26,0:50:0,66,899:..	0/0:20:20,0:50:0,66,659:..	0/0:18:18,0:50:0,60,599:..	0/0:19:19,0:50:0,60,599:..	0/0:22:22,0:48:0,72,719:..	0/0:16:16,0:48:0,66,659:..	0/0:14:14,0:42:0,42,419:..	0/0:20:20,0:50:0,69,689:..	0/0:21:21,0:50:0,72,719:..	0/0:24:24,0:50:0,93,929:..	0/1:30:14,16:39:39,0,53:..	0/0:18:18,0:50:0,57,569:..	0/0:25:25,0:50:0,69,929:..	0/0:23:23,0:50:0,72,719:..	0/0:19:19,0:48:0,69,689:..	0/0:21:21,0:48:0,93,929:..	0/0:23:23,0:50:0,78,779:..	0/0:21:21,0:50:0,66,659:..	0/0:22:22,0:50:0,72,719:..	0/0:23:23,0:48:0,75,749:..	0/0:16:16,0:48:0,48,479:..	0/0:24:24,0:50:0,96,959:..	0/0:23:23,0:50:0,75,749:..	0/0:20:20,0:50:0,60,599:..	0/0:23:23,0:48:0,69,689:..	seq2
chr9	33314248	chr9_33314248_C_A	C	A	31	AF=0.013889;AQ=31	GT:DP:AD:GQ:PL:RNC	0/0:19:19,0:50:0,75,749:..	0/0:25:25,0:45:0,45,689:..	0/0:18:18,0:50:0,69,929:..	0/0:23:23,0:50:0,72,719:..	0/0:22:22,0:36:0,36,599:..	0/0:19:19,0:50:0,60,599:..	0/0:14:14,0:42:0,42,419:..	0/0:19:19,0:48:0,75,749:..	0/0:16:16,0:48:0,54,539:..	0/0:26:26,0:50:0,102,1019:..	0/0:23:23,0:48:0,72,719:..	0/0:22:22,0:48:0,66,659:..	0/0:25:25,0:50:0,84,839:..	0/0:23:23,0:50:0,69,689:..	0/1:29:17,12:32:31,0,45:..	0/0:23:23,0:48:0,48,719:..	0/0:24:24,0:50:0,75,749:..	0/0:16:16,0:48:0,48,479:..	0/0:19:19,0:50:0,60,599:..	0/0:32:32,0:48:0,102,1019:..	0/0:21:21,0:50:0,66,659:..	0/0:30:30,0:50:0,96,959:..	0/0:16:16,0:48:0,48,479:..	0/0:18:18,0:50:0,75,749:..	0/0:25:25,0:48:0,114,1139:..	0/0:24:24,0:50:0,72,719:..	0/0:24:24,0:50:0,87,869:..	0/0:22:22,0:48:0,69,689:..	0/0:23:23,0:50:0,69,689:..	0/0:23:23,0:50:0,75,749:..	0/0:17:17,0:48:0,54,539:..	0/0:22:22,0:50:0,69,689:..	0/0:21:21,0:48:0,69,689:..	0/0:21:21,0:50:0,69,689:..	0/0:18:18,0:50:0,102,1019:..	0/0:25:25,0:48:0,75,749:..	seq2
chr9	41240540	chr9_41240540_G_A	G	A	40	AF=0.013889;AQ=40	GT:DP:AD:GQ:PL:RNC	0/0:22:22,0:50:0,69,689:..	0/0:16:16,0:48:0,48,479:..	0/0:19:19,0:50:0,69,689:..	0/0:18:18,0:50:0,75,749:..	0/0:29:29,0:50:0,105,1049:..	0/0:26:26,0:50:0,90,899:..	0/0:22:22,0:50:0,69,689:..	0/0:19:19,0:50:0,66,659:..	0/0:25:25,0:50:0,75,749:..	0/0:17:17,0:50:0,60,599:..	0/0:17:17,0:50:0,51,509:..	0/0:25:25,0:50:0,51,749:..	0/0:27:27,0:50:0,54,779:..	0/1:24:13,11:41:40,0,52:..	0/0:23:23,0:50:0,78,779:..	0/0:18:18,0:50:0,78,779:..	0/0:24:24,0:50:0,96,959:..	0/0:21:21,0:50:0,66,659:..	0/0:24:24,0:48:0,84,839:..	0/0:21:21,0:50:0,72,719:..	0/0:24:24,0:50:0,75,749:..	0/0:25:25,0:48:0,75,749:..	0/0:16:16,0:48:0,48,479:..	0/0:21:21,0:50:0,66,659:..	0/0:17:17,0:48:0,72,719:..	0/0:23:23,0:48:0,72,719:..	0/0:20:20,0:48:0,75,749:..	0/0:20:20,0:50:0,75,749:..	0/0:18:18,0:50:0,69,689:..	0/0:22:22,0:50:0,96,959:..	0/0:20:20,0:48:0,63,629:..	0/0:23:23,0:50:0,75,749:..	0/0:20:20,0:50:0,78,779:..	0/0:25:25,0:50:0,81,809:..	0/0:22:22,0:50:0,66,659:..	0/0:19:19,0:50:0,69,689:..	seq2
chr9	46205837	chr9_46205837_G_A	G	A	27	AF=0.013889;AQ=27	GT:DP:AD:GQ:PL:RNC	0/0:26:26,0:50:0,78,779:..	0/0:23:23,0:48:0,72,719:..	0/0:18:18,0:50:0,54,539:..	0/0:19:19,0:48:0,66,659:..	0/0:25:25,0:48:0,75,749:..	0/0:22:22,0:50:0,75,749:..	0/0:16:16,0:48:0,72,719:..	0/0:22:22,0:50:0,69,689:..	0/0:16:16,0:48:0,51,509:..	0/0:21:21,0:48:0,72,719:..	0/0:16:16,0:48:0,54,539:..	0/0:22:22,0:48:0,66,659:..	0/0:25:25,0:48:0,75,749:..	0/0:22:22,0:50:0,72,719:..	0/0:21:21,0:50:0,102,1019:..	0/0:21:21,0:50:0,69,689:..	0/1:32:22,10:27:27,0,48:..	0/0:22:22,0:50:0,69,689:..	0/0:23:23,0:48:0,78,779:..	0/0:19:19,0:50:0,66,659:..	0/0:22:22,0:50:0,99,989:..	0/0:22:22,0:48:0,87,869:..	0/0:21:21,0:50:0,75,749:..	0/0:22:22,0:50:0,84,839:..	0/0:21:21,0:50:0,63,629:..	0/0:22:22,0:50:0,66,659:..	0/0:26:26,0:50:0,96,959:..	0/0:30:30,0:50:0,102,1019:..	0/0:18:18,0:50:0,72,719:..	0/0:20:20,0:50:0,75,749:..	0/0:21:21,0:48:0,72,719:..	0/0:26:26,0:50:0,90,899:..	0/0:14:14,0:42:0,42,419:..	0/0:23:23,0:50:0,75,749:..	0/0:25:25,0:50:0,75,749:..	0/0:24:24,0:48:0,75,749:..	seq2
chr9	47192229	chr9_47192229_C_T	C	T	35	AF=0.013889;AQ=35	GT:DP:AD:GQ:PL:RNC	0/0:17:17,0:48:0,60,599:..	0/0:20:20,0:50:0,75,749:..	0/0:28:28,0:50:0,102,1019:..	0/0:16:16,0:48:0,48,479:..	0/0:24:24,0:50:0,105,1049:..	0/0:25:25,0:48:0,75,749:..	0/0:22:22,0:36:0,36,599:..	0/0:16:16,0:48:0,48,479:..	0/0:16:16,0:48:0,48,479:..	0/0:20:20,0:50:0,66,659:..	0/0:22:22,0:48:0,66,659:..	0/0:21:21,0:50:0,69,689:..	0/0:17:17,0:50:0,54,539:..	0/0:14:14,0:42:0,45,449:..	0/0:24:24,0:48:0,72,719:..	0/0:23:23,0:48:0,72,719:..	0/0:25:25,0:50:0,75,749:..	0/0:16:16,0:48:0,48,479:..	0/0:24:24,0:50:0,72,719:..	0/0:23:23,0:50:0,69,689:..	0/0:24:24,0:50:0,75,749:..	0/1:38:23,14:35:35,0,53:..	0/0:17:17,0:50:0,66,659:..	0/0:26:26,0:48:0,84,839:..	0/0:16:16,0:48:0,48,479:..	0/0:25:25,0:48:0,75,749:..	0/0:25:25,0:50:0,75,749:..	0/0:21:21,0:50:0,63,629:..	0/0:16:16,0:48:0,51,509:..	0/0:22:22,0:48:0,75,749:..	0/0:12:12,0:36:0,39,389:..	0/0:20:20,0:50:0,69,689:..	0/0:21:21,0:50:0,69,689:..	0/0:24:24,0:48:0,75,749:..	0/0:18:18,0:50:0,54,539:..	0/0:23:23,0:48:0,69,689:..	seq2
chr9	57298310	chr9_57298310_C_A	C	A	46	AF=0.013889;AQ=46	GT:DP:AD:GQ:PL:RNC	0/0:16:16,0:48:0,48,479:..	0/0:16:16,0:48:0,57,569:..	0/0:21:21,0:50:0,69,689:..	0/0:18:18,0:50:0,66,659:..	0/0:23:23,0:50:0,78,779:..	0/0:25:25,0:50:0,75,749:..	0/0:18:18,0:48:0,54,539:..	0/0:24:24,0:48:0,72,719:..	0/0:18:18,0:48:0,66,659:..	0/0:16:16,0:48:0,66,659:..	0/0:16:16,0:48:0,48,479:..	0/0:28:28,0:50:0,93,929:..	0/0:16:16,0:48:0,51,509:..	0/0:21:21,0:48:0,63,629:..	0/1:40:16,24:46:46,0,55:..	0/0:14:14,0:42:0,45,449:..	0/0:25:25,0:50:0,75,749:..	0/0:17:17,0:50:0,51,509:..	0/0:20:20,0:48:0,63,629:..	0/0:16:16,0:48:0,63,629:..	0/0:22:22,0:50:0,75,749:..	0/0:23:23,0:48:0,69,689:..	0/0:22:22,0:50:0,87,869:..	0/0:26:26,0:50:0,78,779:..	0/0:18:18,0:50:0,72,719:..	0/0:23:23,0:50:0,69,689:..	0/0:24:24,0:50:0,78,779:..	0/0:21:21,0:48:0,72,719:..	0/0:22:22,0:50:0,60,839:..	0/0:12:12,0:36:0,39,389:..	0/0:24:24,0:48:0,87,869:..	0/0:22:22,0:50:0,66,659:..	0/0:26:26,0:48:0,90,899:..	0/0:24:24,0:50:0,72,719:..	0/0:24:24,0:50:0,72,719:..	0/0:23:23,0:48:0,72,719:..	seq2
chr9	58513805	chr9_58513805_C_T	C	T	35	AF=0.013889;AQ=35	GT:DP:AD:GQ:PL:RNC	0/0:22:22,0:48:0,84,839:..	0/0:22:22,0:48:0,72,719:..	0/0:27:27,0:50:0,84,839:..	0/0:24:24,0:50:0,75,749:..	0/0:17:17,0:50:0,51,509:..	0/0:26:26,0:48:0,126,1259:..	0/0:18:18,0:48:0,69,689:..	0/0:24:24,0:50:0,90,899:..	0/0:21:21,0:48:0,75,749:..	0/0:25:25,0:50:0,75,749:..	0/0:23:23,0:50:0,69,689:..	0/0:23:23,0:48:0,72,719:..	0/0:20:20,0:50:0,75,749:..	0/0:23:23,0:48:0,81,809:..	0/0:23:23,0:50:0,72,719:..	0/0:22:22,0:50:0,72,719:..	0/1:38:23,15:36:35,0,51:..	0/0:21:21,0:50:0,66,659:..	0/0:18:18,0:50:0,72,719:..	0/0:19:19,0:50:0,93,929:..	0/0:20:20,0:50:0,75,749:..	0/0:25:25,0:50:0,90,899:..	0/0:22:22,0:50:0,90,899:..	0/0:32:32,0:50:0,69,929:..	0/0:24:24,0:48:0,75,749:..	0/0:18:18,0:50:0,72,719:..	0/0:23:23,0:39:0,39,629:..	0/0:23:23,0:50:0,75,749:..	0/0:19:19,0:50:0,69,689:..	0/0:21:21,0:48:0,72,719:..	0/0:25:25,0:48:0,96,959:..	0/0:20:20,0:48:0,60,599:..	0/0:21:21,0:50:0,69,689:..	0/0:20:20,0:50:0,72,719:..	0/0:19:19,0:50:0,63,629:..	0/0:24:24,0:50:0,87,869:..	seq2
chr9	61180174	chr9_61180174_T_C	T	C	26	AF=0.013889;AQ=26	GT:DP:AD:GQ:PL:RNC	0/0:29:29,0:50:0,99,989:..	0/0:22:22,0:36:0,36,599:..	0/0:22:22,0:50:0,69,689:..	0/0:22:22,0:50:0,66,659:..	0/1:25:18,7:27:26,0,49:..	0/0:21:21,0:50:0,72,719:..	0/0:22:22,0:50:0,69,689:..	0/0:22:22,0:50:0,72,719:..	0/0:28:28,0:50:0,99,989:..	0/0:32:32,0:50:0,81,1049:..	0/0:25:25,0:48:0,54,779:..	0/0:18:18,0:50:0,54,539:..	0/0:26:26,0:50:0,99,989:..	0/0:27:27,0:50:0,96,959:..	0/0:24:24,0:50:0,105,1049:..	0/0:24:24,0:48:0,90,899:..	0/0:26:26,0:50:0,87,869:..	0/0:25:25,0:50:0,75,749:..	0/0:18:18,0:50:0,69,689:..	0/0:21:21,0:48:0,78,779:..	0/0:23:23,0:48:0,87,869:..	0/0:31:31,0:48:0,120,1199:..	0/0:20:20,0:50:0,72,719:..	0/0:26:26,0:50:0,141,1409:..	0/0:19:19,0:50:0,57,569:..	0/0:23:23,0:48:0,105,1049:..	0/0:35:35,0:48:0,117,1169:..	0/0:27:27,0:50:0,102,1019:..	0/0:23:23,0:48:0,96,959:..	0/0:14:14,0:42:0,45,449:..	0/0:25:25,0:50:0,75,749:..	0/0:29:29,0:50:0,90,899:..	0/0:24:24,0:48:0,102,1019:..	0/0:23:23,0:48:0,78,779:..	0/0:25:25,0:50:0,78,779:..	0/0:22:22,0:48:0,90,899:..	seq2
chr9	66726052	chr9_66726052_C_T	C	T	39	AF=0.013889;AQ=39	GT:DP:AD:GQ:PL:RNC	0/0:21:21,0:50:0,75,749:..	0/0:21:21,0:50:0,102,1019:..	0/0:23:23,0:48:0,48,719:..	0/0:17:17,0:50:0,54,539:..	0/0:17:17,0:50:0,75,749:..	0/0:26:26,0:48:0,108,1079:..	0/0:28:28,0:50:0,105,1049:..	0/0:19:19,0:50:0,69,689:..	0/0:19:19,0:50:0,63,629:..	0/0:21:21,0:50:0,81,809:..	0/1:31:16,15:39:39,0,49:..	0/0:16:16,0:48:0,48,479:..	0/0:20:20,0:50:0,69,689:..	0/0:24:24,0:50:0,99,989:..	0/0:23:23,0:50:0,105,1049:..	0/0:18:18,0:48:0,75,749:..	0/0:23:23,0:50:0,66,899:..	0/0:20:20,0:50:0,78,779:..	0/0:20:20,0:50:0,66,659:..	0/0:24:24,0:48:0,93,929:..	0/0:24:24,0:48:0,111,1109:..	0/0:25:25,0:48:0,90,899:..	0/0:16:16,0:48:0,48,479:..	0/0:27:27,0:48:0,114,1139:..	0/0:17:17,0:50:0,51,509:..	0/0:24:24,0:50:0,93,929:..	0/0:31:31,0:50:0,105,1049:..	0/0:19:19,0:50:0,72,719:..	0/0:25:25,0:50:0,90,899:..	0/0:20:20,0:48:0,117,1169:..	0/0:17:17,0:50:0,66,659:..	0/0:16:16,0:48:0,48,479:..	0/0:20:20,0:48:0,105,1049:..	0/0:16:16,0:48:0,114,1139:..	0/0:20:20,0:50:0,72,719:..	0/0:17:17,0:50:0,102,1259:..	seq2
chr9	71464219	chr9_71464219_C_T	C	T	33	AF=0.013889;AQ=33	GT:DP:AD:GQ:PL:RNC	0/0:24:24,0:48:0,117,1169:..	0/0:22:22,0:50:0,66,659:..	0/0:19:19,0:50:0,75,749:..	0/0:23:23,0:48:0,78,779:..	0/0:22:22,0:50:0,72,719:..	0/0:24:24,0:50:0,87,869:..	0/0:26:26,0:48:0,81,809:..	0/0:16:16,0:48:0,48,479:..	0/0:16:16,0:48:0,48,479:..	0/0:17:17,0:48:0,120,1199:..	0/0:19:19,0:50:0,66,659:..	0/0:18:18,0:50:0,105,1049:..	0/0:19:19,0:50:0,93,929:..	0/0:32:32,0:48:0,99,989:..	0/0:19:19,0:50:0,81,809:..	0/0:25:25,0:50:0,75,749:..	0/0:22:22,0:48:0,105,1049:..	0/0:25:25,0:50:0,75,989:..	0/0:27:27,0:50:0,84,839:..	0/0:13:13,0:39:0,39,389:..	0/0:21:21,0:50:0,69,689:..	0/0:17:17,0:50:0,72,719:..	0/1:33:20,12:33:33,0,55:..	0/0:30:30,0:50:0,99,989:..	0/0:26:26,0:50:0,93,929:..	0/0:27:27,0:50:0,96,959:..	0/0:23:23,0:48:0,105,1049:..	0/0:24:24,0:50:0,72,719:..	0/0:29:29,0:48:0,120,1199:..	0/0:28:28,0:50:0,93,929:..	0/0:21:21,0:50:0,102,1019:..	0/0:25:25,0:48:0,78,779:..	0/0:23:23,0:50:0,81,809:..	0/0:22:22,0:50:0,72,719:..	0/0:24:24,0:50:0,72,719:..	0/0:22:22,0:48:0,84,839:..	seq2
chr9	79336693	chr9_79336693_C_T	C	T	46	AF=0.013889;AQ=46	GT:DP:AD:GQ:PL:RNC	0/0:16:16,0:48:0,63,629:..	0/0:22:22,0:50:0,66,659:..	0/0:19:19,0:48:0,78,779:..	0/0:18:18,0:48:0,66,659:..	0/0:17:17,0:50:0,69,689:..	0/0:16:16,0:48:0,57,569:..	0/0:22:22,0:50:0,69,689:..	0/0:23:23,0:50:0,81,809:..	0/0:19:19,0:48:0,57,569:..	0/0:20:20,0:48:0,81,809:..	0/0:23:23,0:50:0,72,719:..	0/0:22:22,0:48:0,75,749:..	0/0:20:20,0:50:0,72,719:..	0/0:16:16,0:48:0,75,749:..	0/0:22:22,0:48:0,69,689:..	0/0:23:23,0:48:0,114,1139:..	0/0:29:29,0:50:0,96,959:..	0/0:23:23,0:48:0,81,809:..	0/0:25:25,0:50:0,84,839:..	0/0:21:21,0:48:0,69,689:..	0/0:22:22,0:50:0,66,659:..	0/0:23:23,0:48:0,102,1019:..	0/0:17:17,0:50:0,90,899:..	0/0:23:23,0:48:0,90,899:..	0/0:19:19,0:50:0,72,719:..	0/0:22:22,0:50:0,90,899:..	0/0:22:22,0:50:0,72,719:..	0/0:17:17,0:50:0,57,569:..	0/0:24:24,0:50:0,72,719:..	0/0:23:23,0:50:0,75,749:..	0/0:25:25,0:48:0,75,749:..	0/0:20:20,0:50:0,60,599:..	0/0:23:23,0:50:0,69,689:..	0/1:29:14,15:46:46,0,54:..	0/0:18:18,0:50:0,57,569:..	0/0:24:24,0:50:0,81,809:..	seq2
chr9	82418054	chr9_82418054_C_T	C	T	35	AF=0.013889;AQ=35	GT:DP:AD:GQ:PL:RNC	0/0:20:20,0:50:0,60,599:..	0/0:20:20,0:50:0,69,689:..	0/0:22:22,0:50:0,102,1019:..	0/0:19:19,0:50:0,57,569:..	0/0:16:16,0:48:0,72,719:..	0/0:24:24,0:50:0,75,749:..	0/0:16:16,0:48:0,63,629:..	0/0:25:25,0:50:0,78,779:..	0/0:21:21,0:50:0,99,989:..	0/0:24:24,0:50:0,93,929:..	0/0:23:23,0:50:0,93,929:..	0/0:23:23,0:48:0,72,719:..	0/0:16:16,0:48:0,78,779:..	0/0:24:24,0:50:0,78,779:..	0/0:23:23,0:48:0,102,1019:..	0/0:20:20,0:50:0,78,779:..	0/0:21:21,0:50:0,111,1109:..	0/0:16:16,0:48:0,60,599:..	0/0:19:19,0:48:0,69,689:..	0/0:16:16,0:48:0,123,1229:..	0/0:21:21,0:50:0,63,629:..	0/1:35:21,14:36:35,0,54:..	0/0:19:19,0:50:0,72,719:..	0/0:20:20,0:50:0,129,1289:..	0/0:22:22,0:50:0,81,809:..	0/0:23:23,0:50:0,108,1079:..	0/0:24:24,0:50:0,72,719:..	0/0:23:23,0:50:0,96,959:..	0/0:21:21,0:50:0,114,1139:..	0/0:20:20,0:50:0,69,689:..	0/0:23:23,0:50:0,78,779:..	0/0:16:16,0:48:0,63,629:..	0/0:23:23,0:50:0,72,719:..	0/0:22:22,0:50:0,66,659:..	0/0:21:21,0:50:0,78,779:..	0/0:19:19,0:50:0,96,959:..	seq2
chr9	83959332	chr9_83959332_C_T	C	T	41	AF=0.013889;AQ=41	GT:DP:AD:GQ:PL:RNC	0/0:18:18,0:50:0,69,689:..	0/0:18:18,0:50:0,93,929:..	0/0:24:24,0:50:0,75,749:..	0/0:24:24,0:48:0,81,809:..	0/0:18:18,0:50:0,60,599:..	0/0:16:16,0:48:0,48,479:..	0/0:22:22,0:50:0,81,809:..	0/0:17:17,0:50:0,102,1019:..	0/0:19:19,0:50:0,63,629:..	0/0:26:26,0:50:0,87,869:..	0/0:21:21,0:48:0,66,659:..	0/0:19:19,0:50:0,66,659:..	0/0:17:17,0:50:0,54,539:..	0/0:22:22,0:50:0,72,719:..	0/0:24:24,0:50:0,99,989:..	0/0:18:18,0:50:0,81,809:..	0/0:19:19,0:48:0,87,869:..	0/0:22:22,0:50:0,72,719:..	0/0:16:16,0:48:0,54,539:..	0/0:22:22,0:50:0,72,719:..	0/0:25:25,0:50:0,78,779:..	0/0:19:19,0:48:0,57,569:..	0/1:22:10,12:41:41,0,54:..	0/0:26:26,0:50:0,120,1199:..	0/0:20:20,0:50:0,105,1049:..	0/0:21:21,0:50:0,75,749:..	0/0:22:22,0:48:0,105,1049:..	0/0:22:22,0:50:0,72,719:..	0/0:20:20,0:48:0,99,989:..	0/0:22:22,0:48:0,99,989:..	0/0:23:23,0:50:0,111,1109:..	0/0:17:17,0:50:0,60,599:..	0/0:21:21,0:50:0,123,1229:..	0/0:23:23,0:48:0,90,899:..	0/0:19:19,0:50:0,63,629:..	0/0:20:20,0:48:0,75,749:..	seq2
chr9	87066197	chr9_87066197_A_T	A	T	43	AF=0.013889;AQ=43	GT:DP:AD:GQ:PL:RNC	0/0:18:18,0:50:0,69,689:..	0/0:21:21,0:50:0,66,659:..	0/0:17:17,0:50:0,54,539:..	0/0:23:23,0:50:0,75,749:..	0/0:16:16,0:48:0,93,929:..	0/1:31:16,15:44:43,0,54:..	0/0:21:21,0:50:0,72,719:..	0/0:25:25,0:48:0,81,809:..	0/0:19:19,0:48:0,75,749:..	0/0:21:21,0:50:0,72,719:..	0/0:16:16,0:48:0,54,539:..	0/0:24:24,0:50:0,147,1469:..	0/0:24:24,0:48:0,90,899:..	0/0:28:28,0:50:0,84,839:..	0/0:25:25,0:50:0,99,989:..	0/0:22:22,0:50:0,66,659:..	0/0:21:21,0:48:0,75,749:..	0/0:21:21,0:48:0,63,629:..	0/0:21:21,0:50:0,69,689:..	0/0:27:27,0:50:0,105,1049:..	0/0:25:25,0:48:0,75,749:..	0/0:23:23,0:50:0,105,1049:..	0/0:23:23,0:50:0,102,1019:..	0/0:25:25,0:50:0,75,749:..	0/0:24:24,0:50:0,117,1169:..	0/0:18:18,0:48:0,72,719:..	0/0:23:23,0:50:0,69,689:..	0/0:25:25,0:48:0,81,809:..	0/0:19:19,0:50:0,60,599:..	0/0:20:20,0:50:0,102,1019:..	0/0:34:34,0:50:0,117,1169:..	0/0:20:20,0:50:0,60,599:..	0/0:18:18,0:48:0,57,569:..	0/0:23:23,0:50:0,111,1109:..	0/0:15:15,0:45:0,45,449:..	0/0:23:23,0:48:0,96,959:..	seq2
chr9	89882416	chr9_89882416_G_A	G	A	38	AF=0.013889;AQ=38	GT:DP:AD:GQ:PL:RNC	0/0:24:24,0:42:0,42,659:..	0/0:22:22,0:48:0,75,749:..	0/0:19:19,0:48:0,66,659:..	0/0:21:21,0:50:0,84,839:..	0/0:24:24,0:50:0,72,719:..	0/0:16:16,0:48:0,48,479:..	0/0:19:19,0:50:0,75,749:..	0/0:19:19,0:48:0,87,869:..	0/0:17:17,0:50:0,54,539:..	0/0:17:17,0:50:0,66,659:..	0/1:26:14,12:39:38,0,53:..	0/0:18:18,0:48:0,114,1139:..	0/0:25:25,0:45:0,45,689:..	0/0:27:27,0:50:0,81,809:..	0/0:28:28,0:50:0,126,1259:..	0/0:23:23,0:48:0,75,749:..	0/0:20:20,0:48:0,66,659:..	0/0:21:21,0:50:0,75,749:..	0/0:16:16,0:48:0,54,539:..	0/0:19:19,0:48:0,75,749:..	0/0:20:20,0:48:0,63,629:..	0/0:22:22,0:48:0,72,719:..	0/0:20:20,0:48:0,75,749:..	0/0:29:29,0:50:0,87,1109:..	0/0:14:14,0:42:0,45,449:..	0/0:16:16,0:48:0,60,599:..	0/0:24:24,0:50:0,75,749:..	0/0:19:19,0:50:0,63,629:..	0/0:23:23,0:50:0,81,809:..	0/0:20:20,0:50:0,66,659:..	0/0:24:24,0:50:0,72,719:..	0/0:17:17,0:50:0,51,509:..	0/0:25:25,0:50:0,78,779:..	0/0:19:19,0:50:0,72,719:..	0/0:16:16,0:48:0,66,659:..	0/0:23:23,0:48:0,90,899:..	seq2
chr9	98469033	chr9_98469033_T_G	T	G	29	AF=0.013889;AQ=29	GT:DP:AD:GQ:PL:RNC	0/0:23:23,0:50:0,117,1169:..	0/0:18:18,0:48:0,96,959:..	0/0:24:24,0:50:0,90,899:..	0/0:21:21,0:50:0,99,989:..	0/0:16:16,0:48:0,48,479:..	0/0:23:23,0:50:0,99,989:..	0/0:24:24,0:50:0,96,959:..	0/0:18:18,0:50:0,78,779:..	0/0:22:22,0:50:0,102,1019:..	0/0:28:28,0:50:0,87,869:..	0/0:19:19,0:50:0,78,779:..	0/0:25:25,0:50:0,93,929:..	0/0:21:21,0:48:0,87,869:..	0/0:27:27,0:50:0,141,1409:..	0/0:23:23,0:48:0,159,1589:..	0/0:24:24,0:50:0,87,869:..	0/0:26:26,0:50:0,81,809:..	0/0:23:23,0:50:0,99,989:..	0/0:24:24,0:50:0,75,749:..	0/0:25:25,0:48:0,93,929:..	0/0:25:25,0:50:0,87,869:..	0/0:30:30,0:50:0,114,1139:..	0/0:24:24,0:50:0,114,1139:..	0/0:31:31,0:50:0,120,1199:..	0/0:21:21,0:50:0,69,689:..	0/0:19:19,0:50:0,111,1109:..	0/0:28:28,0:48:0,102,1019:..	0/0:27:27,0:50:0,93,929:..	0/1:25:17,8:30:29,0,51:..	0/0:18:18,0:50:0,57,569:..	0/0:22:22,0:50:0,75,989:..	0/0:22:22,0:50:0,90,899:..	0/0:22:22,0:50:0,84,839:..	0/0:22:22,0:48:0,96,959:..	0/0:21:21,0:50:0,96,959:..	0/0:18:18,0:48:0,54,539:..	seq2
chr9	101136742	chr9_101136742_C_T	C	T	46	AF=0.013889;AQ=46	GT:DP:AD:GQ:PL:RNC	0/0:22:22,0:48:0,75,749:..	0/0:18:18,0:50:0,78,779:..	0/0:26:26,0:50:0,123,1229:..	0/0:26:26,0:48:0,84,839:..	0/0:20:20,0:50:0,66,659:..	0/0:21:21,0:50:0,135,1349:..	0/0:18:18,0:50:0,75,749:..	0/0:20:20,0:50:0,60,599:..	0/0:25:25,0:48:0,84,839:..	0/0:18:18,0:48:0,66,659:..	0/0:22:22,0:50:0,93,929:..	0/0:23:23,0:50:0,72,719:..	0/0:22:22,0:48:0,78,779:..	0/0:25:25,0:48:0,102,1019:..	0/0:26:26,0:50:0,99,989:..	0/0:18:18,0:50:0,63,629:..	0/0:25:25,0:50:0,75,749:..	0/0:14:14,0:42:0,45,449:..	0/0:25:25,0:50:0,87,869:..	0/0:20:20,0:48:0,99,989:..	0/0:17:17,0:48:0,105,1049:..	0/0:29:29,0:50:0,99,989:..	0/0:24:24,0:48:0,72,719:..	0/0:26:26,0:50:0,78,779:..	0/0:21:21,0:50:0,99,989:..	0/0:24:24,0:48:0,102,1019:..	0/0:24:24,0:48:0,72,719:..	0/0:17:17,0:50:0,81,809:..	0/1:27:12,15:45:46,0,53:..	0/0:20:20,0:48:0,72,719:..	0/0:24:24,0:50:0,72,719:..	0/0:24:24,0:48:0,105,1049:..	0/0:24:24,0:48:0,81,809:..	0/0:21:21,0:50:0,66,659:..	0/0:22:22,0:50:0,75,749:..	0/0:26:26,0:50:0,99,989:..	seq2
chr9	104001617	chr9_104001617_C_G	C	G	30	AF=0.013889;AQ=30	GT:DP:AD:GQ:PL:RNC	0/0:21:21,0:50:0,66,659:..	0/0:17:17,0:50:0,60,599:..	0/0:25:25,0:50:0,75,749:..	0/0:18:18,0:48:0,75,749:..	0/0:22:22,0:48:0,66,659:..	0/0:17:17,0:50:0,60,599:..	0/0:20:20,0:50:0,57,809:..	0/0:16:16,0:48:0,48,479:..	0/0:16:16,0:48:0,66,659:..	0/0:17:17,0:50:0,72,719:..	0/0:15:15,0:45:0,45,449:..	0/1:26:17,9:31:30,0,49:..	0/0:20:20,0:50:0,78,779:..	0/0:24:24,0:50:0,72,719:..	0/0:17:17,0:50:0,102,1019:..	0/0:20:20,0:48:0,72,719:..	0/0:23:23,0:50:0,108,1079:..	0/0:18:18,0:50:0,54,539:..	0/0:20:20,0:50:0,66,659:..	0/0:25:25,0:50:0,75,749:..	0/0:16:16,0:48:0,48,479:..	0/0:21:21,0:48:0,72,719:..	0/0:23:23,0:48:0,72,719:..	0/0:26:26,0:50:0,108,1079:..	0/0:21:21,0:48:0,66,659:..	0/0:23:23,0:50:0,72,719:..	0/0:28:28,0:50:0,111,1109:..	0/0:24:24,0:48:0,75,749:..	0/0:20:20,0:48:0,72,719:..	0/0:23:23,0:48:0,69,689:..	0/0:28:28,0:50:0,141,1409:..	0/0:17:17,0:48:0,75,749:..	0/0:16:16,0:48:0,90,899:..	0/0:22:22,0:48:0,72,719:..	0/0:12:12,0:36:0,39,389:..	0/0:21:21,0:50:0,102,1019:..	seq2
chr9	108749280	chr9_108749280_A_T	A	T	38	AF=0.013889;AQ=38	GT:DP:AD:GQ:PL:RNC	0/0:15:15,0:45:0,45,449:..	0/0:20:20,0:50:0,63,629:..	0/0:16:16,0:48:0,75,749:..	0/0:16:16,0:48:0,102,1019:..	0/0:19:19,0:50:0,84,839:..	0/1:25:11,14:38:38,0,51:..	0/0:16:16,0:48:0,66,659:..	0/0:18:18,0:50:0,57,569:..	0/0:21:21,0:50:0,75,749:..	0/0:19:19,0:50:0,66,659:..	0/0:22:22,0:36:0,36,599:..	0/0:20:20,0:48:0,60,599:..	0/0:21:21,0:50:0,87,869:..	0/0:24:24,0:48:0,84,839:..	0/0:22:22,0:48:0,72,719:..	0/0:19:19,0:50:0,57,569:..	0/0:16:16,0:48:0,48,479:..	0/0:13:13,0:39:0,39,389:..	0/0:16:16,0:48:0,66,659:..	0/0:17:17,0:50:0,72,719:..	0/0:22:22,0:48:0,93,929:..	0/0:23:23,0:50:0,93,929:..	0/0:16:16,0:48:0,48,479:..	0/0:17:17,0:48:0,69,689:..	0/0:17:17,0:50:0,63,629:..	0/0:20:20,0:30:0,30,539:..	0/0:16:16,0:48:0,48,479:..	0/0:14:14,0:42:0,45,449:..	0/0:22:22,0:50:0,81,809:..	0/0:20:20,0:50:0,75,749:..	0/0:16:16,0:48:0,66,659:..	0/0:16:16,0:48:0,48,479:..	0/0:18:18,0:50:0,84,839:..	0/0:17:17,0:50:0,72,719:..	0/0:16:16,0:48:0,63,629:..	0/0:18:18,0:50:0,84,839:..	seq2
chr9	114103302	chr9_114103302_C_T	C	T	47	AF=0.013889;AQ=47	GT:DP:AD:GQ:PL:RNC	0/0:23:23,0:50:0,81,809:..	0/0:23:23,0:48:0,69,689:..	0/0:18:18,0:50:0,96,959:..	0/0:23:23,0:50:0,120,1199:..	0/0:21:21,0:50:0,78,779:..	0/0:18:18,0:48:0,72,719:..	0/0:22:22,0:48:0,75,749:..	0/0:25:25,0:50:0,96,959:..	0/0:23:23,0:48:0,69,689:..	0/0:22:22,0:50:0,108,1079:..	0/0:20:20,0:48:0,75,749:..	0/0:27:27,0:50:0,87,869:..	0/0:24:24,0:50:0,75,749:..	0/0:22:22,0:48:0,72,719:..	0/0:21:21,0:50:0,96,959:..	0/1:23:10,13:47:47,0,58:..	0/0:24:24,0:48:0,72,719:..	0/0:17:17,0:50:0,87,869:..	0/0:23:23,0:48:0,75,749:..	0/0:23:23,0:50:0,75,749:..	0/0:25:25,0:48:0,81,809:..	0/0:25:25,0:50:0,108,1079:..	0/0:25:25,0:48:0,78,779:..	0/0:24:24,0:50:0,81,1049:..	0/0:22:22,0:48:0,75,749:..	0/0:26:26,0:50:0,105,1049:..	0/0:24:24,0:50:0,117,1169:..	0/0:19:19,0:48:0,132,1319:..	0/0:26:26,0:50:0,96,959:..	0/0:26:26,0:48:0,96,959:..	0/0:26:26,0:48:0,120,1199:..	0/0:20:20,0:48:0,78,779:..	0/0:18:18,0:50:0,72,719:..	0/0:24:24,0:48:0,72,719:..	0/0:16:16,0:48:0,51,509:..	0/0:22:22,0:50:0,87,869:..	seq2
chr9	121713715	chr9_121713715_A_C	A	C	37	AF=0.013889;AQ=37	GT:DP:AD:GQ:PL:RNC	0/0:44:44,0:50:0,147,1469:..	0/0:54:54,0:50:0,177,1769:..	0/0:51:51,0:50:0,126,1499:..	0/0:39:39,0:50:0,123,1229:..	0/0:53:53,0:48:0,159,1589:..	0/0:37:37,0:50:0,114,1139:..	0/1:33:17,16:36:37,0,42:..	0/0:37:37,0:50:0,84,1079:..	0/0:34:34,0:50:0,102,1019:..	0/0:26:26,0:50:0,87,869:..	0/0:35:35,0:50:0,51,989:..	0/0:40:40,0:50:0,138,1379:..	0/0:62:62,0:50:0,189,1889:..	0/0:54:54,0:50:0,171,1709:..	0/0:40:40,0:50:0,138,1379:..	0/0:29:29,0:50:0,90,899:..	0/0:33:33,0:50:0,75,989:..	0/0:54:54,0:50:0,162,1619:..	0/0:38:38,0:50:0,117,1169:..	0/0:44:44,0:50:0,138,1379:..	0/0:39:39,0:50:0,123,1229:..	0/0:33:33,0:50:0,84,1079:..	0/0:38:38,0:50:0,120,1199:..	0/0:61:61,0:50:0,63,1589:..	0/0:24:24,0:50:0,75,749:..	0/0:34:34,0:48:0,111,1109:..	0/0:52:52,0:50:0,159,1589:..	0/0:33:33,0:50:0,51,989:..	0/0:36:36,0:50:0,84,1079:..	0/0:55:55,0:50:0,165,1649:..	0/0:44:44,0:50:0,138,1379:..	0/0:42:42,0:50:0,129,1289:..	0/0:36:36,0:48:0,114,1139:..	0/0:33:33,0:50:0,99,989:..	0/0:40:40,0:50:0,123,1229:..	0/0:32:32,0:48:0,123,1229:..	seq2
chr9	122563826	chr9_122563826_G_A	G	A	44	AF=0.013889;AQ=44	GT:DP:AD:GQ:PL:RNC	0/0:21:21,0:50:0,66,659:..	0/0:18:18,0:50:0,57,569:..	0/0:24:24,0:50:0,75,749:..	0/0:19:19,0:50:0,57,569:..	0/0:25:25,0:50:0,99,989:..	0/0:25:25,0:48:0,75,749:..	0/0:17:17,0:50:0,69,689:..	0/0:22:22,0:50:0,93,929:..	0/0:22:22,0:50:0,72,719:..	0/0:23:23,0:50:0,81,809:..	0/0:21:21,0:50:0,69,689:..	0/1:20:9,11:44:44,0,55:..	0/0:17:17,0:50:0,72,719:..	0/0:18:18,0:50:0,63,629:..	0/0:21:21,0:50:0,66,659:..	0/0:25:25,0:50:0,78,779:..	0/0:20:20,0:50:0,66,659:..	0/0:16:16,0:48:0,48,479:..	0/0:25:25,0:48:0,75,749:..	0/0:20:20,0:48:0,78,779:..	0/0:20:20,0:48:0,78,779:..	0/0:20:20,0:48:0,69,689:..	0/0:16:16,0:48:0,48,479:..	0/0:28:28,0:50:0,99,989:..	0/0:25:25,0:50:0,75,749:..	0/0:14:14,0:42:0,42,419:..	0/0:20:20,0:48:0,60,599:..	0/0:20:20,0:48:0,63,629:..	0/0:23:23,0:50:0,75,749:..	0/0:16:16,0:48:0,66,659:..	0/0:16:16,0:48:0,66,659:..	0/0:25:25,0:50:0,75,749:..	0/0:21:21,0:48:0,72,719:..	0/0:18:18,0:48:0,60,599:..	0/0:19:19,0:50:0,57,569:..	0/0:16:16,0:48:0,48,479:..	seq2
chr10	3260601	chr10_3260601_T_A	T	A	34	AF=0.013889;AQ=34	GT:DP:AD:GQ:PL:RNC	0/0:17:17,0:50:0,69,689:..	0/0:20:20,0:50:0,75,749:..	0/0:23:23,0:50:0,78,779:..	0/0:16:16,0:48:0,51,509:..	0/0:22:22,0:50:0,66,659:..	0/0:20:20,0:50:0,75,749:..	0/0:23:23,0:50:0,69,689:..	0/0:22:22,0:50:0,99,989:..	0/0:16:16,0:48:0,48,479:..	0/0:23:23,0:48:0,72,719:..	0/0:16:16,0:48:0,51,509:..	0/0:17:17,0:50:0,72,719:..	0/0:24:24,0:50:0,75,749:..	0/0:21:21,0:48:0,75,749:..	0/0:22:22,0:50:0,93,929:..	0/0:23:23,0:50:0,72,719:..	0/0:23:23,0:48:0,75,749:..	0/0:25:25,0:45:0,45,689:..	0/0:16:16,0:48:0,90,899:..	0/0:16:16,0:48:0,51,509:..	0/0:16:16,0:48:0,48,479:..	0/0:19:19,0:50:0,63,629:..	0/1:20:12,8:34:34,0,52:..	0/0:20:20,0:48:0,69,689:..	0/0:24:24,0:48:0,90,899:..	0/0:21:21,0:50:0,66,659:..	0/0:22:22,0:48:0,93,929:..	0/0:16:16,0:48:0,69,689:..	0/0:24:24,0:48:0,72,719:..	0/0:23:23,0:50:0,75,749:..	0/0:22:22,0:50:0,72,719:..	0/0:16:16,0:48:0,48,479:..	0/0:24:24,0:48:0,81,809:..	0/0:18:18,0:48:0,102,1019:..	0/0:21:21,0:48:0,72,719:..	0/0:20:20,0:50:0,75,749:..	seq2
chr10	10291269	chr10_10291269_C_T	C	T	42	AF=0.013889;AQ=42	GT:DP:AD:GQ:PL:RNC	0/0:31:31,0:50:0,93,929:..	0/0:23:23,0:50:0,69,689:..	0/0:36:36,0:50:0,108,1079:..	0/0:24:24,0:50:0,72,719:..	0/0:30:30,0:50:0,90,899:..	0/0:20:20,0:48:0,72,719:..	0/0:31:31,0:48:0,96,959:..	0/0:19:19,0:48:0,60,599:..	0/0:24:24,0:50:0,72,719:..	0/0:24:24,0:48:0,72,719:..	0/0:21:21,0:50:0,84,839:..	0/0:37:37,0:50:0,111,1109:..	0/0:37:37,0:50:0,111,1109:..	0/1:53:23,30:42:42,0,52:..	0/0:27:27,0:50:0,123,1229:..	0/0:27:27,0:50:0,111,1109:..	0/0:52:52,0:50:0,156,1559:..	0/0:29:29,0:50:0,87,869:..	0/0:27:27,0:50:0,84,839:..	0/0:36:36,0:50:0,108,1079:..	0/0:25:25,0:50:0,135,1349:..	0/0:37:37,0:50:0,111,1109:..	0/0:30:30,0:50:0,93,929:..	0/0:45:45,0:50:0,135,1349:..	0/0:22:22,0:50:0,84,839:..	0/0:27:27,0:50:0,81,809:..	0/0:32:32,0:50:0,99,989:..	0/0:27:27,0:48:0,90,899:..	0/0:17:17,0:50:0,51,509:..	0/0:29:29,0:50:0,87,869:..	0/0:29:29,0:50:0,87,869:..	0/0:31:31,0:50:0,99,989:..	0/0:24:24,0:50:0,72,719:..	0/0:20:20,0:50:0,60,599:..	0/0:25:25,0:50:0,84,839:..	0/0:19:19,0:50:0,57,569:..	seq2
chr10	14798919	chr10_14798919_T_C	T	C	25	AF=0.013889;AQ=25	GT:DP:AD:GQ:PL:RNC	0/0:26:26,0:50:0,87,869:..	0/0:16:16,0:48:0,48,479:..	0/0:29:29,0:50:0,87,869:..	0/0:24:24,0:48:0,78,779:..	0/0:24:24,0:12:0,12,599:..	0/0:28:28,0:1:5,0,665:II	0/0:24:24,0:42:0,42,659:..	0/0:15:15,0:15:0,15,389:..	0/0:14:14,0:42:0,42,419:..	0/0:28:28,0:50:0,84,839:..	0/1:30:14,14:23:25,0,27:..	0/0:27:27,0:50:0,84,839:..	0/0:22:22,0:36:0,36,599:..	0/0:25:25,0:48:0,87,869:..	0/0:21:21,0:50:0,84,839:..	0/0:25:25,0:50:0,75,749:..	0/0:22:22,0:36:0,36,599:..	0/0:21:21,0:50:0,63,629:..	0/0:25:25,0:48:0,87,869:..	0/0:23:23,0:48:0,48,719:..	0/0:20:20,0:3:0,0,479:..	0/0:37:37,0:50:0,111,1109:..	0/0:19:19,0:50:0,57,569:..	0/0:25:25,0:45:0,45,689:..	0/0:32:32,0:36:0,36,839:..	0/0:33:33,0:39:0,39,869:..	0/0:32:32,0:7:0,6,779:..	0/0:22:22,0:48:0,66,659:..	0/0:30:30,0:3:0,0,719:..	0/0:25:25,0:50:0,75,749:..	0/0:22:22,0:50:0,75,749:..	0/0:19:19,0:1:2,0,452:II	0/0:28:28,0:50:0,54,779:..	0/0:25:25,0:45:0,45,689:..	0/0:26:26,0:50:0,78,779:..	0/0:20:20,0:50:0,66,659:..	seq2
chr10	16035104	chr10_16035104_G_T	G	T	39	AF=0.013889;AQ=39	GT:DP:AD:GQ:PL:RNC	0/0:25:25,0:48:0,78,779:..	0/0:20:20,0:48:0,66,659:..	0/0:17:17,0:50:0,63,629:..	0/0:21:21,0:50:0,87,869:..	0/0:20:20,0:50:0,63,629:..	0/0:25:25,0:50:0,78,779:..	0/0:21:21,0:50:0,69,689:..	0/0:18:18,0:50:0,60,599:..	0/0:23:23,0:50:0,69,689:..	0/0:30:30,0:50:0,114,1139:..	0/0:23:23,0:50:0,69,689:..	0/0:28:28,0:50:0,57,809:..	0/0:19:19,0:48:0,63,629:..	0/0:19:19,0:50:0,75,749:..	0/0:19:19,0:50:0,105,1049:..	0/0:20:20,0:50:0,72,719:..	0/1:20:11,9:39:39,0,54:..	0/0:14:14,0:42:0,45,449:..	0/0:22:22,0:50:0,66,659:..	0/0:23:23,0:48:0,75,749:..	0/0:17:17,0:50:0,60,599:..	0/0:25:25,0:50:0,117,1169:..	0/0:19:19,0:48:0,60,599:..	0/0:21:21,0:50:0,75,749:..	0/0:23:23,0:48:0,84,839:..	0/0:22:22,0:50:0,66,659:..	0/0:25:25,0:48:0,105,1049:..	0/0:19:19,0:48:0,69,689:..	0/0:22:22,0:50:0,102,1019:..	0/0:22:22,0:50:0,66,659:..	0/0:17:17,0:50:0,93,929:..	0/0:24:24,0:48:0,75,749:..	0/0:21:21,0:48:0,66,659:..	0/0:16:16,0:48:0,48,479:..	0/0:22:22,0:48:0,87,869:..	0/0:22:22,0:50:0,78,779:..	seq2
chr10	18885460	chr10_18885460_C_A	C	A	32	AF=0.013889;AQ=32	GT:DP:AD:GQ:PL:RNC	0/0:16:16,0:48:0,48,479:..	0/0:8:8,0:24:0,24,239:..	0/0:16:16,0:48:0,48,479:..	0/0:20:20,0:50:0,63,629:..	0/0:23:23,0:50:0,69,689:..	0/0:20:20,0:50:0,63,629:..	0/0:15:15,0:45:0,45,449:..	0/0:16:16,0:48:0,48,479:..	0/0:18:18,0:50:0,60,599:..	0/0:22:22,0:50:0,72,719:..	0/0:14:14,0:42:0,42,419:..	0/0:14:14,0:42:0,42,419:..	0/0:12:12,0:36:0,36,359:..	0/0:25:25,0:48:0,48,719:..	0/0:12:12,0:36:0,39,389:..	0/0:12:12,0:36:0,36,359:..	0/0:16:16,0:48:0,48,479:..	0/0:11:11,0:33:0,33,329:..	0/0:14:14,0:42:0,42,419:..	0/0:14:14,0:42:0,45,449:..	0/0:13:13,0:39:0,39,389:..	0/0:24:24,0:50:0,72,719:..	0/0:11:11,0:33:0,33,329:..	0/0:19:19,0:50:0,60,599:..	0/0:18:18,0:50:0,54,539:..	0/1:16:9,7:32:32,0,50:..	0/0:24:24,0:50:0,72,719:..	0/0:19:19,0:27:0,27,509:..	0/0:12:12,0:36:0,36,359:..	0/0:10:10,0:30:0,30,299:..	0/0:25:25,0:50:0,78,779:..	0/0:17:17,0:50:0,54,539:..	0/0:16:16,0:48:0,48,479:..	0/0:16:16,0:48:0,48,479:..	0/0:17:17,0:50:0,51,509:..	0/0:10:10,0:30:0,30,299:..	seq2
chr10	19671224	chr10_19671224_G_A	G	A	40	AF=0.013889;AQ=40	GT:DP:AD:GQ:PL:RNC	0/0:24:24,0:48:0,84,839:..	0/0:20:20,0:48:0,72,719:..	0/0:21:21,0:33:0,33,569:..	0/0:17:17,0:50:0,96,959:..	0/0:22:22,0:50:0,66,659:..	0/0:18:18,0:50:0,69,689:..	0/0:22:22,0:48:0,69,689:..	0/0:16:16,0:48:0,81,809:..	0/0:18:18,0:50:0,69,689:..	0/0:17:17,0:48:0,57,569:..	0/0:17:17,0:50:0,54,539:..	0/0:28:28,0:50:0,132,1319:..	0/0:17:17,0:50:0,69,689:..	0/1:40:22,18:40:40,0,54:..	0/0:20:20,0:50:0,78,779:..	0/0:16:16,0:48:0,51,509:..	0/0:24:24,0:48:0,135,1349:..	0/0:24:24,0:48:0,75,749:..	0/0:22:22,0:48:0,78,779:..	0/0:22:22,0:48:0,75,749:..	0/0:23:23,0:50:0,99,989:..	0/0:21:21,0:50:0,99,989:..	0/0:19:19,0:50:0,75,749:..	0/0:23:23,0:48:0,123,1229:..	0/0:18:18,0:50:0,57,569:..	0/0:22:22,0:48:0,51,989:..	0/0:22:22,0:48:0,69,929:..	0/0:24:24,0:50:0,90,899:..	0/0:23:23,0:48:0,93,929:..	0/0:16:16,0:48:0,72,719:..	0/0:21:21,0:50:0,117,1169:..	0/0:24:24,0:50:0,75,749:..	0/0:19:19,0:50:0,57,569:..	0/0:18:18,0:50:0,66,659:..	0/0:24:24,0:48:0,78,779:..	0/0:21:21,0:50:0,93,929:..	seq2
chr10	26906624	chr10_26906624_G_A	G	A	24	AF=0.013889;AQ=24	GT:DP:AD:GQ:PL:RNC	0/0:21:21,0:48:0,99,989:..	0/0:19:19,0:48:0,57,569:..	0/0:22:22,0:50:0,81,809:..	0/0:19:19,0:48:0,90,899:..	0/0:22:22,0:50:0,69,689:..	0/0:23:23,0:39:0,39,629:..	0/0:22:22,0:48:0,72,719:..	0/0:19:19,0:50:0,72,719:..	0/0:18:18,0:50:0,69,689:..	0/0:28:28,0:50:0,117,1169:..	0/0:16:16,0:48:0,57,569:..	0/0:20:20,0:50:0,75,749:..	0/0:19:19,0:48:0,84,839:..	0/0:21:21,0:50:0,75,749:..	0/0:23:23,0:50:0,69,689:..	0/0:25:25,0:45:0,45,689:..	0/0:14:14,0:42:0,42,419:..	0/0:23:23,0:39:0,39,629:..	0/0:22:22,0:48:0,75,749:..	0/0:16:16,0:48:0,48,479:..	0/0:23:23,0:48:0,90,899:..	0/0:16:16,0:48:0,123,1229:..	0/0:28:28,0:50:0,69,929:..	0/0:22:22,0:50:0,126,1259:..	0/0:17:17,0:50:0,51,509:..	0/0:18:18,0:50:0,54,539:..	0/0:20:20,0:50:0,84,839:..	0/1:21:15,6:24:24,0,47:..	0/0:21:21,0:48:0,75,749:..	0/0:19:19,0:50:0,81,809:..	0/0:22:22,0:48:0,126,1259:..	0/0:24:24,0:50:0,90,899:..	0/0:23:23,0:50:0,105,1049:..	0/0:16:16,0:48:0,63,629:..	0/0:18:18,0:50:0,81,809:..	0/0:19:19,0:50:0,69,689:..	seq2
chr10	30774831	chr10_30774831_T_G	T	G	26	AF=0.013889;AQ=26	GT:DP:AD:GQ:PL:RNC	0/0:21:21,0:50:0,63,629:..	0/0:12:12,0:36:0,39,389:..	0/0:17:17,0:50:0,63,629:..	0/0:21:21,0:50:0,72,719:..	0/0:19:19,0:50:0,66,659:..	0/0:20:20,0:50:0,69,689:..	0/0:16:16,0:48:0,57,569:..	0/0:14:14,0:42:0,45,449:..	0/0:14:14,0:42:0,45,449:..	0/0:21:21,0:50:0,66,659:..	0/0:16:16,0:48:0,48,479:..	0/0:26:26,0:48:0,87,869:..	0/0:20:20,0:50:0,75,749:..	0/0:22:22,0:48:0,87,869:..	0/0:24:24,0:48:0,81,809:..	0/0:22:22,0:50:0,69,689:..	0/0:16:16,0:48:0,60,599:..	0/0:16:16,0:48:0,48,479:..	0/0:25:25,0:50:0,84,839:..	0/0:16:16,0:48:0,60,599:..	0/0:18:18,0:50:0,63,629:..	0/0:23:23,0:50:0,69,689:..	0/0:16:16,0:48:0,48,479:..	0/0:21:21,0:50:0,81,809:..	0/0:19:19,0:48:0,66,659:..	0/0:18:18,0:50:0,75,749:..	0/0:23:23,0:50:0,75,749:..	0/1:16:11,5:27:26,0,49:..	0/0:20:20,0:48:0,66,659:..	0/0:19:19,0:50:0,72,719:..	0/0:19:19,0:50:0,72,719:..	0/0:20:20,0:50:0,69,689:..	0/0:24:24,0:50:0,75,749:..	0/0:22:22,0:50:0,72,719:..	0/0:19:19,0:48:0,60,599:..	0/0:24:24,0:48:0,81,809:..	seq2
chr10	32117768	chr10_32117768_C_G	C	G	35	AF=0.013889;AQ=35	GT:DP:AD:GQ:PL:RNC	0/0:19:19,0:50:0,57,569:..	0/0:24:24,0:48:0,75,749:..	0/0:22:22,0:48:0,72,719:..	0/0:18:18,0:50:0,57,569:..	0/0:17:17,0:50:0,63,629:..	0/0:21:21,0:50:0,66,659:..	0/0:16:16,0:48:0,48,479:..	0/0:20:20,0:50:0,69,689:..	0/0:16:16,0:48:0,48,479:..	0/0:22:22,0:48:0,72,719:..	0/0:22:22,0:48:0,69,689:..	0/0:22:22,0:50:0,69,689:..	0/0:20:20,0:50:0,72,719:..	0/0:18:18,0:48:0,72,719:..	0/0:24:24,0:50:0,72,719:..	0/0:18:18,0:50:0,72,719:..	0/0:19:19,0:50:0,60,599:..	0/1:19:10,9:35:35,0,54:..	0/0:24:24,0:42:0,42,659:..	0/0:20:20,0:50:0,63,629:..	0/0:19:19,0:48:0,75,749:..	0/0:25:25,0:50:0,114,1139:..	0/0:16:16,0:48:0,75,749:..	0/0:24:24,0:50:0,72,719:..	0/0:19:19,0:50:0,66,659:..	0/0:20:20,0:50:0,75,749:..	0/0:21:21,0:50:0,63,629:..	0/0:16:16,0:48:0,48,479:..	0/0:23:23,0:50:0,78,779:..	0/0:18:18,0:48:0,75,749:..	0/0:24:24,0:50:0,75,749:..	0/0:22:22,0:50:0,69,689:..	0/0:23:23,0:50:0,81,809:..	0/0:20:20,0:50:0,66,659:..	0/0:20:20,0:50:0,63,629:..	0/0:16:16,0:48:0,48,479:..	seq2
chr10	36372484	chr10_36372484_T_A	T	A	42	AF=0.013889;AQ=42	GT:DP:AD:GQ:PL:RNC	0/0:21:21,0:48:0,69,689:..	0/0:21:21,0:48:0,69,689:..	0/0:23:23,0:50:0,78,779:..	0/0:25:25,0:45:0,45,689:..	0/0:17:17,0:50:0,66,659:..	0/0:23:23,0:48:0,72,719:..	0/0:18:18,0:50:0,75,749:..	0/0:23:23,0:48:0,78,779:..	0/0:18:18,0:50:0,57,569:..	0/0:22:22,0:48:0,78,779:..	0/0:19:19,0:50:0,66,659:..	0/0:22:22,0:48:0,102,1019:..	0/0:21:21,0:48:0,72,719:..	0/0:24:24,0:48:0,90,899:..	0/0:27:27,0:50:0,111,1109:..	0/0:21:21,0:50:0,69,689:..	0/0:20:20,0:48:0,63,629:..	0/0:23:23,0:48:0,69,689:..	0/0:26:26,0:48:0,93,929:..	0/0:23:23,0:50:0,69,689:..	0/0:24:24,0:48:0,105,1049:..	0/0:21:21,0:50:0,63,629:..	0/0:19:19,0:48:0,60,599:..	0/0:22:22,0:50:0,69,689:..	0/0:18:18,0:50:0,57,569:..	0/0:27:27,0:50:0,93,929:..	0/0:22:22,0:50:0,66,659:..	0/0:16:16,0:48:0,72,719:..	0/1:30:14,16:42:42,0,54:..	0/0:18:18,0:50:0,57,569:..	0/0:24:24,0:48:0,75,749:..	0/0:23:23,0:50:0,75,749:..	0/0:21:21,0:48:0,72,719:..	0/0:18:18,0:50:0,57,569:..	0/0:23:23,0:50:0,75,749:..	0/0:21:21,0:50:0,72,719:..	seq2
chr10	44305481	chr10_44305481_C_T	C	T	41	AF=0.013889;AQ=41	GT:DP:AD:GQ:PL:RNC	0/0:16:16,0:48:0,75,749:..	0/0:20:20,0:50:0,63,629:..	0/0:22:22,0:50:0,69,689:..	0/0:24:24,0:48:0,105,1049:..	0/0:21:21,0:48:0,87,869:..	0/0:23:23,0:50:0,96,959:..	0/0:21:21,0:50:0,63,629:..	0/0:21:21,0:50:0,63,629:..	0/0:20:20,0:50:0,66,659:..	0/0:18:18,0:50:0,75,749:..	0/0:23:23,0:50:0,81,809:..	0/0:20:20,0:50:0,84,839:..	0/0:25:25,0:48:0,120,1199:..	0/0:21:21,0:48:0,63,629:..	0/0:21:21,0:50:0,63,629:..	0/0:16:16,0:48:0,48,479:..	0/0:25:25,0:48:0,78,779:..	0/0:22:22,0:50:0,84,839:..	0/0:20:20,0:48:0,60,599:..	0/0:20:20,0:48:0,66,659:..	0/0:23:23,0:48:0,69,689:..	0/0:29:29,0:50:0,114,1139:..	0/0:18:18,0:48:0,75,749:..	0/0:31:31,0:50:0,111,1109:..	0/0:21:21,0:48:0,72,719:..	0/0:23:23,0:50:0,75,749:..	0/0:28:28,0:50:0,138,1379:..	0/1:23:14,9:41:41,0,57:..	0/0:19:19,0:48:0,75,749:..	0/0:25:25,0:50:0,90,899:..	0/0:24:24,0:50:0,72,719:..	0/0:22:22,0:48:0,72,719:..	0/0:17:17,0:50:0,54,539:..	0/0:22:22,0:50:0,72,719:..	0/0:19:19,0:50:0,69,689:..	0/0:25:25,0:50:0,81,809:..	seq2
chr10	44821517	chr10_44821517_T_A	T	A	36	AF=0.013889;AQ=36	GT:DP:AD:GQ:PL:RNC	0/0:20:20,0:50:0,87,869:..	0/0:23:23,0:48:0,75,749:..	0/0:28:28,0:50:0,93,929:..	0/0:19:19,0:48:0,84,839:..	0/0:21:21,0:50:0,75,749:..	0/1:41:23,18:37:36,0,50:..	0/0:19:19,0:50:0,75,749:..	0/0:19:19,0:50:0,57,569:..	0/0:16:16,0:48:0,66,659:..	0/0:19:19,0:50:0,72,719:..	0/0:22:22,0:50:0,75,749:..	0/0:25:25,0:48:0,75,749:..	0/0:18:18,0:50:0,63,629:..	0/0:23:23,0:48:0,99,989:..	0/0:21:21,0:48:0,87,869:..	0/0:21:21,0:50:0,72,719:..	0/0:19:19,0:50:0,129,1289:..	0/0:20:20,0:50:0,60,599:..	0/0:20:20,0:48:0,72,719:..	0/0:16:16,0:48:0,105,1049:..	0/0:14:14,0:42:0,45,449:..	0/0:27:27,0:50:0,147,1469:..	0/0:19:19,0:50:0,66,659:..	0/0:20:20,0:48:0,120,1199:..	0/0:20:20,0:50:0,72,719:..	0/0:23:23,0:48:0,72,719:..	0/0:25:25,0:50:0,93,929:..	0/0:19:19,0:50:0,57,569:..	0/0:22:22,0:50:0,72,719:..	0/0:19:19,0:50:0,66,659:..	0/0:21:21,0:48:0,66,659:..	0/0:16:16,0:48:0,48,479:..	0/0:26:26,0:48:0,105,1049:..	0/0:23:23,0:39:0,39,629:..	0/0:21:21,0:50:0,72,719:..	0/0:23:23,0:50:0,72,719:..	seq2
chr10	45334425	chr10_45334425_C_A	C	A	37	AF=0.013889;AQ=37	GT:DP:AD:GQ:PL:RNC	0/0:24:24,0:48:0,90,899:..	0/0:20:20,0:50:0,66,659:..	0/0:20:20,0:48:0,75,749:..	0/0:17:17,0:50:0,57,569:..	0/0:24:24,0:50:0,135,1349:..	0/0:23:23,0:48:0,72,719:..	0/0:19:19,0:50:0,78,779:..	0/0:23:23,0:48:0,69,689:..	0/0:24:24,0:48:0,105,1049:..	0/0:23:23,0:50:0,75,749:..	0/1:36:18,18:38:37,0,55:..	0/0:16:16,0:48:0,54,539:..	0/0:23:23,0:50:0,84,839:..	0/0:18:18,0:50:0,72,719:..	0/0:27:27,0:50:0,84,839:..	0/0:21:21,0:50:0,75,749:..	0/0:20:20,0:48:0,75,749:..	0/0:21:21,0:50:0,72,719:..	0/0:22:22,0:50:0,78,779:..	0/0:26:26,0:48:0,132,1319:..	0/0:16:16,0:48:0,72,719:..	0/0:25:25,0:50:0,96,959:..	0/0:19:19,0:48:0,78,779:..	0/0:25:25,0:50:0,78,1019:..	0/0:22:22,0:48:0,78,779:..	0/0:22:22,0:50:0,69,689:..	0/0:25:25,0:50:0,78,779:..	0/0:20:20,0:48:0,75,749:..	0/0:16:16,0:48:0,48,479:..	0/0:21:21,0:48:0,81,809:..	0/0:20:20,0:50:0,99,989:..	0/0:18:18,0:50:0,93,929:..	0/0:23:23,0:50:0,72,719:..	0/0:18:18,0:50:0,54,779:..	0/0:17:17,0:48:0,51,509:..	0/0:19:19,0:50:0,78,779:..	seq2
chr10	46577545	chr10_46577545_G_C	G	C	38	AF=0.013889;AQ=38	GT:DP:AD:GQ:PL:RNC	0/0:21:21,0:50:0,75,749:..	0/0:17:17,0:50:0,72,719:..	0/0:22:22,0:48:0,75,749:..	0/0:24:24,0:50:0,75,749:..	0/0:20:20,0:48:0,87,869:..	0/0:24:24,0:50:0,72,719:..	0/0:21:21,0:50:0,69,689:..	0/0:17:17,0:48:0,78,779:..	0/1:37:18,19:38:38,0,51:..	0/0:25:25,0:50:0,81,809:..	0/0:25:25,0:48:0,75,749:..	0/0:26:26,0:48:0,84,839:..	0/0:18:18,0:50:0,63,629:..	0/0:22:22,0:50:0,69,689:..	0/0:21:21,0:50:0,63,629:..	0/0:17:17,0:50:0,69,689:..	0/0:21:21,0:50:0,63,629:..	0/0:21:21,0:50:0,69,689:..	0/0:23:23,0:48:0,75,749:..	0/0:21:21,0:50:0,102,1019:..	0/0:23:23,0:50:0,75,749:..	0/0:21:21,0:50:0,99,989:..	0/0:20:20,0:50:0,66,659:..	0/0:23:23,0:50:0,84,839:..	0/0:21:21,0:50:0,75,749:..	0/0:19:19,0:50:0,72,719:..	0/0:22:22,0:48:0,72,719:..	0/0:19:19,0:50:0,75,749:..	0/0:23:23,0:48:0,72,719:..	0/0:19:19,0:50:0,72,719:..	0/0:25:25,0:48:0,99,989:..	0/0:23:23,0:50:0,75,749:..	0/0:19:19,0:50:0,63,629:..	0/0:21:21,0:50:0,72,719:..	0/0:17:17,0:50:0,51,509:..	0/0:22:22,0:48:0,75,749:..	seq2
chr10	60579985	chr10_60579985_C_G	C	G	39	AF=0.013889;AQ=39	GT:DP:AD:GQ:PL:RNC	0/0:22:22,0:50:0,66,659:..	0/0:23:23,0:50:0,69,689:..	0/0:25:25,0:50:0,75,749:..	0/0:25:25,0:50:0,75,749:..	0/0:19:19,0:48:0,105,1049:..	0/0:32:32,0:50:0,99,989:..	0/0:23:23,0:48:0,75,749:..	0/0:23:23,0:50:0,69,689:..	0/0:22:22,0:50:0,69,689:..	0/0:17:17,0:50:0,66,659:..	0/0:25:25,0:50:0,102,1019:..	0/0:21:21,0:50:0,69,689:..	0/0:25:25,0:48:0,81,809:..	0/0:23:23,0:50:0,69,689:..	0/0:25:25,0:48:0,48,719:..	0/0:29:29,0:50:0,60,839:..	0/0:21:21,0:50:0,72,719:..	0/0:22:22,0:48:0,66,659:..	0/0:17:17,0:48:0,69,689:..	0/0:22:22,0:50:0,66,659:..	0/0:23:23,0:50:0,96,959:..	0/0:20:20,0:50:0,72,719:..	0/0:21:21,0:48:0,75,749:..	0/0:24:24,0:48:0,114,1139:..	0/0:24:24,0:50:0,78,779:..	0/0:26:26,0:48:0,102,1019:..	0/1:45:24,21:40:39,0,55:..	0/0:22:22,0:48:0,75,749:..	0/0:26:26,0:50:0,105,1049:..	0/0:24:24,0:42:0,42,659:..	0/0:21:21,0:50:0,69,689:..	0/0:20:20,0:50:0,66,659:..	0/0:18:18,0:50:0,60,599:..	0/0:14:14,0:42:0,45,449:..	0/0:23:23,0:50:0,96,959:..	0/0:21:21,0:48:0,75,749:..	seq2
chr10	71308678	chr10_71308678_C_T	C	T	41	AF=0.013889;AQ=41	GT:DP:AD:GQ:PL:RNC	0/0:23:23,0:50:0,75,749:..	0/0:20:20,0:50:0,66,659:..	0/0:20:20,0:48:0,108,1079:..	0/0:20:20,0:50:0,69,689:..	0/0:23:23,0:48:0,135,1349:..	0/0:20:20,0:48:0,66,659:..	0/0:19:19,0:50:0,75,749:..	0/0:22:22,0:50:0,81,809:..	0/0:29:29,0:27:0,27,749:..	0/0:21:21,0:48:0,114,1139:..	0/0:23:23,0:48:0,102,1019:..	0/0:31:31,0:50:0,111,1109:..	0/0:21:21,0:50:0,81,809:..	0/0:26:26,0:50:0,96,959:..	0/0:27:27,0:50:0,87,869:..	0/0:23:23,0:48:0,90,899:..	0/0:22:22,0:48:0,75,749:..	0/0:20:20,0:50:0,60,599:..	0/0:16:16,0:48:0,48,479:..	0/0:22:22,0:48:0,72,719:..	0/0:25:25,0:50:0,75,749:..	0/0:30:30,0:50:0,102,1019:..	0/0:19:19,0:50:0,57,569:..	0/0:31:31,0:50:0,93,929:..	0/0:16:16,0:48:0,66,659:..	0/0:20:20,0:48:0,72,719:..	0/0:25:25,0:50:0,75,749:..	0/1:32:14,18:41:41,0,54:..	0/0:21:21,0:50:0,105,1049:..	0/0:20:20,0:48:0,87,869:..	0/0:28:28,0:48:0,132,1319:..	0/0:21:21,0:50:0,72,719:..	0/0:26:26,0:48:0,84,839:..	0/0:25:25,0:50:0,84,839:..	0/0:25:25,0:48:0,75,749:..	0/0:18:18,0:48:0,102,1019:..	seq2
chr10	73223420	chr10_73223420_G_A	G	A	30	AF=0.013889;AQ=30	GT:DP:AD:GQ:PL:RNC	0/0:23:23,0:50:0,75,749:..	0/0:21:21,0:50:0,72,719:..	0/0:16:16,0:48:0,57,569:..	0/0:20:20,0:50:0,75,749:..	0/0:22:22,0:48:0,72,719:..	0/0:21:21,0:48:0,90,899:..	0/0:16:16,0:48:0,48,479:..	0/0:21:21,0:48:0,78,779:..	0/0:17:17,0:50:0,75,749:..	0/0:25:25,0:50:0,84,839:..	0/0:22:22,0:48:0,72,719:..	0/0:27:27,0:50:0,96,959:..	0/0:21:21,0:50:0,78,779:..	0/0:19:19,0:50:0,96,959:..	0/0:24:24,0:48:0,75,749:..	0/0:22:22,0:48:0,72,719:..	0/0:17:17,0:50:0,90,899:..	0/0:22:22,0:36:0,36,599:..	0/0:20:20,0:48:0,69,689:..	0/0:26:26,0:50:0,78,779:..	0/0:20:20,0:50:0,75,749:..	0/0:24:24,0:50:0,84,839:..	0/0:25:25,0:48:0,75,749:..	0/0:21:21,0:50:0,72,719:..	0/0:16:16,0:48:0,57,569:..	0/0:25:25,0:50:0,93,929:..	0/0:22:22,0:48:0,132,1319:..	0/1:28:19,9:30:30,0,51:..	0/0:20:20,0:50:0,60,599:..	0/0:21:21,0:48:0,78,779:..	0/0:22:22,0:48:0,102,1019:..	0/0:22:22,0:50:0,69,689:..	0/0:24:24,0:50:0,72,719:..	0/0:22:22,0:48:0,90,899:..	0/0:19:19,0:48:0,75,749:..	0/0:23:23,0:50:0,93,929:..	seq2
chr10	74185934	chr10_74185934_T_C	T	C	47	AF=0.013889;AQ=47	GT:DP:AD:GQ:PL:RNC	0/0:21:21,0:50:0,75,749:..	0/0:23:23,0:48:0,72,719:..	0/0:22:22,0:50:0,69,689:..	0/0:21:21,0:50:0,69,689:..	0/0:16:16,0:48:0,48,479:..	0/0:18:18,0:50:0,57,569:..	0/0:20:20,0:48:0,72,719:..	0/0:20:20,0:50:0,63,629:..	0/0:22:22,0:50:0,66,659:..	0/0:16:16,0:48:0,48,479:..	0/0:25:25,0:48:0,75,749:..	0/0:24:24,0:50:0,90,899:..	0/0:17:17,0:50:0,51,509:..	0/0:25:25,0:50:0,75,749:..	0/0:26:26,0:48:0,78,779:..	0/0:20:20,0:50:0,75,749:..	0/0:21:21,0:48:0,69,689:..	0/1:20:6,14:46:47,0,50:..	0/0:21:21,0:50:0,66,659:..	0/0:24:24,0:48:0,72,719:..	0/0:20:20,0:50:0,108,1079:..	0/0:21:21,0:48:0,63,629:..	0/0:16:16,0:48:0,48,479:..	0/0:27:27,0:50:0,84,839:..	0/0:18:18,0:50:0,57,569:..	0/0:16:16,0:48:0,48,479:..	0/0:26:26,0:50:0,117,1169:..	0/0:21:21,0:48:0,63,629:..	0/0:26:26,0:50:0,84,839:..	0/0:18:18,0:50:0,66,659:..	0/0:23:23,0:50:0,69,689:..	0/0:22:22,0:50:0,69,689:..	0/0:24:24,0:48:0,72,719:..	0/0:19:19,0:48:0,108,1079:..	0/0:20:20,0:50:0,63,629:..	0/0:23:23,0:50:0,72,719:..	seq2
chr10	80958331	chr10_80958331_G_A	G	A	50	AF=0.013889;AQ=50	GT:DP:AD:GQ:PL:RNC	0/0:25:25,0:48:0,102,1019:..	0/0:20:20,0:48:0,66,659:..	0/0:19:19,0:48:0,72,719:..	0/0:23:23,0:48:0,75,749:..	0/0:22:22,0:48:0,84,839:..	0/0:19:19,0:48:0,57,569:..	0/0:22:22,0:50:0,69,689:..	0/0:22:22,0:50:0,72,719:..	0/0:20:20,0:48:0,72,719:..	0/0:25:25,0:48:0,87,869:..	0/0:24:24,0:50:0,75,749:..	0/0:25:25,0:50:0,90,899:..	0/0:22:22,0:50:0,75,749:..	0/0:18:18,0:50:0,75,749:..	0/0:20:20,0:50:0,87,869:..	0/0:24:24,0:50:0,84,839:..	0/0:18:18,0:48:0,78,779:..	0/0:23:23,0:48:0,81,809:..	0/0:20:20,0:48:0,69,689:..	0/0:21:21,0:50:0,78,779:..	0/0:21:21,0:50:0,63,629:..	0/0:26:26,0:50:0,141,1409:..	0/1:35:15,20:49:50,0,52:..	0/0:23:23,0:48:0,90,899:..	0/0:16:16,0:48:0,51,509:..	0/0:21:21,0:50:0,66,659:..	0/0:22:22,0:50:0,69,689:..	0/0:22:22,0:48:0,78,779:..	0/0:20:20,0:48:0,63,629:..	0/0:22:22,0:48:0,96,959:..	0/0:25:25,0:50:0,75,749:..	0/0:16:16,0:48:0,69,689:..	0/0:23:23,0:50:0,69,689:..	0/0:16:16,0:48:0,72,719:..	0/0:20:20,0:50:0,63,629:..	0/0:22:22,0:48:0,72,719:..	seq2
chr10	88144361	chr10_88144361_C_T	C	T	49	AF=0.013889;AQ=49	GT:DP:AD:GQ:PL:RNC	0/0:20:20,0:48:0,60,599:..	0/0:21:21,0:50:0,63,629:..	0/0:18:18,0:50:0,60,599:..	0/0:24:24,0:50:0,81,809:..	0/0:20:20,0:50:0,69,689:..	0/0:22:22,0:50:0,66,659:..	0/0:25:25,0:48:0,99,989:..	0/0:24:24,0:48:0,84,839:..	0/0:22:22,0:48:0,72,719:..	0/0:20:20,0:48:0,93,929:..	0/0:22:22,0:48:0,66,659:..	0/0:23:23,0:50:0,81,809:..	0/0:22:22,0:50:0,96,959:..	0/0:22:22,0:50:0,99,989:..	0/0:19:19,0:50:0,114,1139:..	0/0:19:19,0:48:0,96,959:..	0/0:24:24,0:50:0,108,1079:..	0/0:18:18,0:50:0,57,569:..	0/0:16:16,0:48:0,48,479:..	0/0:19:19,0:50:0,69,689:..	0/0:20:20,0:50:0,69,689:..	0/0:21:21,0:50:0,102,1019:..	0/0:23:23,0:50:0,87,869:..	0/0:22:22,0:48:0,69,689:..	0/0:24:24,0:48:0,75,749:..	0/0:20:20,0:48:0,132,1319:..	0/0:16:16,0:48:0,69,689:..	0/1:27:8,19:46:49,0,48:..	0/0:22:22,0:50:0,72,719:..	0/0:22:22,0:48:0,48,719:..	0/0:19:19,0:48:0,75,749:..	0/0:20:20,0:50:0,63,629:..	0/0:16:16,0:48:0,63,629:..	0/0:17:17,0:50:0,51,509:..	0/0:19:19,0:50:0,69,689:..	0/0:25:25,0:50:0,90,899:..	seq2
chr10	94954365	chr10_94954365_C_T	C	T	22	AF=0.013889;AQ=22	GT:DP:AD:GQ:PL:RNC	0/0:22:22,0:50:0,66,659:..	0/0:25:25,0:50:0,75,749:..	0/0:20:20,0:48:0,102,1019:..	0/0:25:25,0:48:0,75,749:..	0/0:23:23,0:48:0,75,749:..	0/0:21:21,0:50:0,93,929:..	0/0:23:23,0:50:0,60,839:..	0/0:16:16,0:48:0,60,599:..	0/0:19:19,0:50:0,60,599:..	0/0:19:19,0:50:0,105,1049:..	0/0:21:21,0:48:0,81,809:..	0/0:26:26,0:48:0,78,779:..	0/0:24:24,0:50:0,75,749:..	0/0:27:27,0:50:0,105,1049:..	0/0:31:31,0:50:0,99,989:..	0/0:24:24,0:48:0,75,749:..	0/0:27:27,0:50:0,99,989:..	0/0:23:23,0:48:0,72,719:..	0/0:25:25,0:50:0,75,749:..	0/0:22:22,0:50:0,66,659:..	0/0:18:18,0:50:0,60,599:..	0/0:32:32,0:48:0,102,1019:..	0/0:17:17,0:50:0,66,659:..	0/0:24:24,0:48:0,72,719:..	0/0:22:22,0:50:0,66,659:..	0/0:20:20,0:50:0,63,629:..	0/0:30:30,0:50:0,96,959:..	0/0:22:22,0:50:0,66,659:..	0/0:18:18,0:50:0,72,719:..	0/0:20:20,0:48:0,66,659:..	0/0:24:24,0:50:0,78,779:..	0/0:16:16,0:48:0,72,719:..	0/0:21:21,0:48:0,93,929:..	0/1:37:28,9:23:22,0,47:..	0/0:17:17,0:50:0,57,569:..	0/0:19:19,0:50:0,84,839:..	seq2
chr10	97641120	chr10_97641120_G_A	G	A	36	AF=0.013889;AQ=36	GT:DP:AD:GQ:PL:RNC	0/0:20:20,0:50:0,63,629:..	0/0:22:22,0:50:0,66,659:..	0/0:15:15,0:45:0,45,449:..	0/0:21:21,0:33:0,33,569:..	0/0:17:17,0:50:0,51,509:..	0/0:22:22,0:50:0,66,659:..	0/0:20:20,0:50:0,63,629:..	0/0:18:18,0:50:0,54,539:..	0/0:12:12,0:36:0,36,359:..	0/0:16:16,0:48:0,48,479:..	0/0:19:19,0:50:0,57,569:..	0/0:14:14,0:42:0,42,419:..	0/0:17:17,0:50:0,51,509:..	0/0:24:24,0:48:0,75,749:..	0/0:17:17,0:50:0,54,539:..	0/0:22:22,0:50:0,66,659:..	0/0:26:26,0:48:0,48,719:..	0/1:16:8,8:36:36,0,50:..	0/0:16:16,0:48:0,48,479:..	0/0:20:20,0:50:0,60,599:..	0/0:18:18,0:50:0,54,539:..	0/0:19:19,0:50:0,57,569:..	0/0:18:18,0:50:0,66,659:..	0/0:20:20,0:50:0,60,599:..	0/0:20:20,0:50:0,60,599:..	0/0:16:16,0:48:0,48,479:..	0/0:28:28,0:50:0,84,839:..	0/0:13:13,0:39:0,39,389:..	0/0:17:17,0:0:8,0,398:II	0/0:32:32,0:50:0,96,959:..	0/0:19:19,0:27:0,27,509:..	0/0:13:13,0:39:0,39,389:..	0/0:17:17,0:21:0,24,479:..	0/0:22:22,0:50:0,69,689:..	0/0:22:22,0:50:0,66,659:..	0/0:19:19,0:50:0,57,569:..	seq2
chr10	112319006	chr10_112319006_C_A	C	A	30	AF=0.013889;AQ=30	GT:DP:AD:GQ:PL:RNC	0/0:23:23,0:50:0,84,839:..	0/0:30:30,0:50:0,96,959:..	0/0:24:24,0:50:0,93,929:..	0/0:16:16,0:48:0,48,479:..	0/0:21:21,0:50:0,81,809:..	0/0:20:20,0:50:0,63,629:..	0/0:20:20,0:50:0,78,779:..	0/0:20:20,0:50:0,81,809:..	0/0:24:24,0:50:0,78,779:..	0/0:26:26,0:50:0,96,959:..	0/0:23:23,0:48:0,72,719:..	0/0:16:16,0:48:0,108,1079:..	0/0:22:22,0:50:0,66,659:..	0/0:22:22,0:48:0,75,749:..	0/0:23:23,0:50:0,84,839:..	0/0:17:17,0:50:0,66,659:..	0/0:20:20,0:50:0,75,749:..	0/1:19:12,7:31:30,0,49:..	0/0:21:21,0:50:0,66,659:..	0/0:16:16,0:48:0,48,479:..	0/0:24:24,0:50:0,99,989:..	0/0:24:24,0:48:0,132,1319:..	0/0:23:23,0:50:0,78,779:..	0/0:29:29,0:50:0,93,929:..	0/0:22:22,0:50:0,66,659:..	0/0:18:18,0:50:0,54,539:..	0/0:26:26,0:50:0,102,1019:..	0/0:19:19,0:50:0,57,569:..	0/0:22:22,0:48:0,72,719:..	0/0:35:35,0:50:0,108,1079:..	0/0:29:29,0:50:0,96,959:..	0/0:19:19,0:50:0,63,629:..	0/0:26:26,0:50:0,87,869:..	0/0:26:26,0:50:0,81,809:..	0/0:24:24,0:48:0,96,959:..	0/0:24:24,0:50:0,78,779:..	seq2
chr10	112809033	chr10_112809033_C_T	C	T	35	AF=0.013889;AQ=35	GT:DP:AD:GQ:PL:RNC	0/0:12:12,0:36:0,36,359:..	0/0:11:11,0:33:0,33,329:..	0/0:9:9,0:27:0,30,299:..	0/0:6:6,0:18:0,18,179:..	0/0:12:12,0:36:0,36,359:..	0/0:11:11,0:33:0,33,329:..	0/0:9:9,0:27:0,27,269:..	0/0:9:9,0:27:0,27,269:..	0/0:10:10,0:30:0,30,299:..	0/0:8:8,0:24:0,24,239:..	0/0:8:8,0:24:0,24,239:..	0/0:9:9,0:27:0,27,269:..	0/0:9:9,0:27:0,27,269:..	0/0:8:8,0:24:0,24,239:..	0/0:16:16,0:48:0,48,479:..	0/0:13:13,0:39:0,39,389:..	0/0:7:7,0:21:0,24,239:..	0/0:12:12,0:36:0,36,359:..	0/0:14:14,0:42:0,42,419:..	0/0:6:6,0:18:0,18,179:..	0/0:12:12,0:36:0,36,359:..	0/0:9:9,0:27:0,30,299:..	0/0:13:13,0:39:0,39,389:..	0/0:10:10,0:30:0,30,299:..	0/0:14:14,0:42:0,42,419:..	0/0:9:9,0:27:0,30,299:..	0/0:12:12,0:36:0,39,389:..	0/1:12:5,7:35:35,0,42:..	0/0:12:12,0:36:0,39,389:..	0/0:16:16,0:48:0,48,479:..	0/0:14:14,0:42:0,42,419:..	0/0:9:9,0:27:0,27,269:..	0/0:10:10,0:30:0,30,299:..	0/0:9:9,0:27:0,30,299:..	0/0:7:7,0:21:0,21,209:..	0/0:8:8,0:24:0,24,239:..	seq2
chr10	114087387	chr10_114087387_T_C	T	C	45	AF=0.013889;AQ=45	GT:DP:AD:GQ:PL:RNC	0/0:24:24,0:48:0,72,719:..	0/0:20:20,0:50:0,72,719:..	0/0:20:20,0:50:0,102,1019:..	0/0:19:19,0:48:0,99,989:..	0/0:16:16,0:48:0,51,509:..	0/0:23:23,0:50:0,75,749:..	0/0:19:19,0:50:0,60,599:..	0/0:24:24,0:50:0,81,809:..	0/0:18:18,0:50:0,69,689:..	0/1:29:12,17:45:45,0,54:..	0/0:19:19,0:48:0,69,689:..	0/0:23:23,0:50:0,72,719:..	0/0:22:22,0:48:0,96,959:..	0/0:18:18,0:48:0,75,749:..	0/0:25:25,0:50:0,87,869:..	0/0:21:21,0:50:0,69,689:..	0/0:18:18,0:48:0,90,899:..	0/0:19:19,0:48:0,90,899:..	0/0:19:19,0:50:0,60,599:..	0/0:21:21,0:48:0,72,719:..	0/0:26:26,0:50:0,87,869:..	0/0:25:25,0:48:0,141,1409:..	0/0:17:17,0:48:0,57,569:..	0/0:19:19,0:48:0,81,809:..	0/0:16:16,0:48:0,63,869:..	0/0:18:18,0:50:0,63,629:..	0/0:24:24,0:50:0,72,719:..	0/0:23:23,0:50:0,75,749:..	0/0:25:25,0:48:0,120,1199:..	0/0:24:24,0:50:0,75,749:..	0/0:24:24,0:50:0,72,719:..	0/0:20:20,0:50:0,72,719:..	0/0:27:27,0:50:0,87,869:..	0/0:17:17,0:50:0,120,1199:..	0/0:18:18,0:50:0,66,659:..	0/0:23:23,0:48:0,123,1229:..	seq2
chr10	116376308	chr10_116376308_T_C	T	C	31	AF=0.013889;AQ=31	GT:DP:AD:GQ:PL:RNC	0/0:22:22,0:50:0,87,869:..	0/0:29:29,0:50:0,72,959:..	0/0:22:22,0:50:0,72,719:..	0/0:27:27,0:50:0,90,899:..	0/0:21:21,0:48:0,63,629:..	0/0:26:26,0:50:0,90,899:..	0/0:21:21,0:48:0,72,719:..	0/0:23:23,0:48:0,111,1109:..	0/0:20:20,0:48:0,69,689:..	0/0:16:16,0:48:0,66,659:..	0/0:22:22,0:48:0,90,899:..	0/0:30:30,0:50:0,102,1019:..	0/0:21:21,0:50:0,69,689:..	0/0:21:21,0:48:0,87,869:..	0/0:32:32,0:50:0,96,959:..	0/0:21:21,0:50:0,69,689:..	0/0:24:24,0:50:0,102,1019:..	0/0:16:16,0:48:0,54,539:..	0/0:19:19,0:50:0,75,749:..	0/0:20:20,0:50:0,96,959:..	0/0:16:16,0:48:0,72,719:..	0/0:21:21,0:50:0,123,1229:..	0/0:16:16,0:48:0,105,1049:..	0/0:28:28,0:50:0,99,989:..	0/0:23:23,0:48:0,72,719:..	0/0:20:20,0:50:0,93,929:..	0/0:26:26,0:50:0,96,959:..	0/0:25:25,0:50:0,75,749:..	0/0:22:22,0:48:0,93,929:..	0/0:16:16,0:48:0,87,869:..	0/0:24:24,0:48:0,87,869:..	0/0:23:23,0:48:0,72,719:..	0/0:21:21,0:50:0,75,749:..	0/0:21:21,0:48:0,75,749:..	0/0:21:21,0:50:0,90,899:..	0/1:33:21,12:31:31,0,52:..	seq2
chr10	126902637	chr10_126902637_G_A	G	A	35	AF=0.013889;AQ=35	GT:DP:AD:GQ:PL:RNC	0/0:26:26,0:50:0,84,839:..	0/0:22:22,0:48:0,78,779:..	0/0:21:21,0:50:0,72,719:..	0/0:25:25,0:50:0,75,749:..	0/1:27:16,11:35:35,0,53:..	0/0:20:20,0:48:0,72,719:..	0/0:24:24,0:50:0,75,749:..	0/0:23:23,0:50:0,69,689:..	0/0:20:20,0:50:0,69,689:..	0/0:25:25,0:48:0,93,929:..	0/0:23:23,0:48:0,69,689:..	0/0:30:30,0:50:0,60,839:..	0/0:23:23,0:50:0,81,809:..	0/0:20:20,0:50:0,60,599:..	0/0:28:28,0:50:0,105,1049:..	0/0:23:23,0:50:0,72,719:..	0/0:24:24,0:50:0,93,929:..	0/0:27:27,0:50:0,63,869:..	0/0:24:24,0:50:0,72,719:..	0/0:18:18,0:48:0,57,569:..	0/0:24:24,0:50:0,129,1289:..	0/0:24:24,0:50:0,75,749:..	0/0:22:22,0:50:0,66,659:..	0/0:23:23,0:50:0,81,809:..	0/0:24:24,0:50:0,75,749:..	0/0:22:22,0:48:0,66,659:..	0/0:28:28,0:50:0,99,989:..	0/0:25:25,0:50:0,96,959:..	0/0:21:21,0:48:0,63,629:..	0/0:25:25,0:50:0,99,989:..	0/0:25:25,0:50:0,78,779:..	0/0:22:22,0:50:0,69,689:..	0/0:28:28,0:50:0,66,899:..	0/0:23:23,0:50:0,69,689:..	0/0:23:23,0:50:0,69,689:..	0/0:23:23,0:50:0,123,1229:..	seq2
chr10	130379418	chr10_130379418_T_C	T	C	24	AF=0.013889;AQ=24	GT:DP:AD:GQ:PL:RNC	0/0:19:19,0:50:0,60,599:..	0/0:17:17,0:50:0,54,539:..	0/0:20:20,0:50:0,123,1229:..	0/0:25:25,0:50:0,96,959:..	0/0:19:19,0:48:0,60,599:..	0/0:17:17,0:50:0,66,659:..	0/0:22:22,0:50:0,102,1019:..	0/1:17:7,10:23:24,0,31:..	0/0:22:22,0:50:0,75,749:..	0/0:16:16,0:48:0,75,749:..	0/0:21:21,0:50:0,72,719:..	0/0:16:16,0:48:0,48,479:..	0/0:24:24,0:48:0,72,719:..	0/0:21:21,0:48:0,78,779:..	0/0:25:25,0:50:0,105,1049:..	0/0:17:17,0:48:0,51,509:..	0/0:18:18,0:50:0,96,959:..	0/0:19:19,0:50:0,57,569:..	0/0:17:17,0:48:0,66,659:..	0/0:18:18,0:50:0,63,629:..	0/0:17:17,0:50:0,75,749:..	0/0:18:18,0:48:0,75,749:..	0/0:21:21,0:50:0,69,689:..	0/0:32:32,0:50:0,123,1229:..	0/0:16:16,0:48:0,63,629:..	0/0:18:18,0:50:0,75,749:..	0/0:25:25,0:50:0,105,1049:..	0/0:20:20,0:48:0,90,899:..	0/0:22:22,0:50:0,75,749:..	0/0:20:20,0:50:0,78,779:..	0/0:23:23,0:48:0,99,989:..	0/0:16:16,0:48:0,48,479:..	0/0:22:22,0:50:0,75,749:..	0/0:19:19,0:50:0,72,719:..	0/0:20:20,0:50:0,72,719:..	0/0:23:23,0:48:0,78,779:..	seq2
chr11	5257779	chr11_5257779_G_A	G	A	38	AF=0.013889;AQ=38	GT:DP:AD:GQ:PL:RNC	0/0:25:25,0:50:0,75,749:..	0/0:17:17,0:50:0,51,509:..	0/0:23:23,0:39:0,39,629:..	0/0:17:17,0:50:0,69,689:..	0/0:19:19,0:50:0,63,629:..	0/0:24:24,0:50:0,90,899:..	0/0:23:23,0:48:0,75,749:..	0/0:27:27,0:48:0,81,809:..	0/0:21:21,0:50:0,63,629:..	0/0:23:23,0:50:0,75,749:..	0/0:22:22,0:50:0,75,749:..	0/0:25:25,0:50:0,105,1049:..	0/1:23:10,13:38:38,0,52:..	0/0:22:22,0:50:0,72,719:..	0/0:19:19,0:50:0,105,1049:..	0/0:23:23,0:48:0,72,719:..	0/0:24:24,0:48:0,81,809:..	0/0:25:25,0:50:0,75,749:..	0/0:16:16,0:48:0,51,509:..	0/0:17:17,0:48:0,57,569:..	0/0:22:22,0:50:0,75,749:..	0/0:27:27,0:50:0,96,959:..	0/0:22:22,0:50:0,75,749:..	0/0:25:25,0:48:0,96,959:..	0/0:22:22,0:50:0,75,749:..	0/0:20:20,0:48:0,75,749:..	0/0:25:25,0:48:0,93,929:..	0/0:21:21,0:50:0,63,629:..	0/0:27:27,0:50:0,99,989:..	0/0:23:23,0:50:0,69,689:..	0/0:22:22,0:48:0,69,689:..	0/0:22:22,0:48:0,75,749:..	0/0:21:21,0:48:0,75,749:..	0/0:27:27,0:50:0,96,959:..	0/0:18:18,0:50:0,57,569:..	0/0:23:23,0:48:0,75,749:..	seq2
chr11	6986914	chr11_6986914_G_A	G	A	48	AF=0.013889;AQ=48	GT:DP:AD:GQ:PL:RNC	0/0:21:21,0:50:0,63,629:..	0/0:16:16,0:48:0,48,479:..	0/0:27:27,0:50:0,99,989:..	0/0:21:21,0:50:0,63,629:..	0/0:25:25,0:50:0,75,749:..	0/0:22:22,0:50:0,72,719:..	0/0:22:22,0:48:0,78,779:..	0/0:20:20,0:48:0,69,689:..	0/0:20:20,0:50:0,72,719:..	0/0:24:24,0:50:0,75,749:..	0/0:26:26,0:48:0,78,779:..	0/0:18:18,0:50:0,57,569:..	0/1:33:14,19:47:48,0,51:..	0/0:25:25,0:50:0,75,749:..	0/0:19:19,0:50:0,60,599:..	0/0:23:23,0:50:0,69,689:..	0/0:21:21,0:48:0,72,719:..	0/0:23:23,0:50:0,75,749:..	0/0:21:21,0:48:0,66,659:..	0/0:22:22,0:50:0,66,659:..	0/0:20:20,0:48:0,72,719:..	0/0:25:25,0:50:0,78,779:..	0/0:24:24,0:50:0,72,719:..	0/0:23:23,0:48:0,105,1049:..	0/0:23:23,0:50:0,75,749:..	0/0:24:24,0:50:0,72,719:..	0/0:21:21,0:50:0,72,719:..	0/0:25:25,0:50:0,75,749:..	0/0:20:20,0:50:0,102,1019:..	0/0:23:23,0:50:0,69,689:..	0/0:23:23,0:48:0,72,719:..	0/0:20:20,0:50:0,69,689:..	0/0:21:21,0:50:0,66,659:..	0/0:17:17,0:50:0,72,719:..	0/0:20:20,0:50:0,90,899:..	0/0:20:20,0:50:0,60,599:..	seq2
chr11	11703138	chr11_11703138_C_G	C	G	39	AF=0.013889;AQ=39	GT:DP:AD:GQ:PL:RNC	0/0:19:19,0:50:0,57,569:..	0/0:16:16,0:48:0,48,479:..	0/0:25:25,0:50:0,102,1019:..	0/0:19:19,0:50:0,99,989:..	0/0:26:26,0:50:0,105,1049:..	0/0:21:21,0:50:0,63,629:..	0/0:24:24,0:48:0,75,749:..	0/0:18:18,0:48:0,84,839:..	0/0:21:21,0:50:0,99,989:..	0/0:21:21,0:50:0,96,959:..	0/0:23:23,0:50:0,87,869:..	0/0:20:20,0:50:0,84,839:..	0/0:20:20,0:50:0,102,1019:..	0/0:31:31,0:50:0,111,1109:..	0/0:24:24,0:50:0,105,1049:..	0/0:21:21,0:50:0,72,719:..	0/1:33:18,15:39:39,0,54:..	0/0:21:21,0:48:0,75,749:..	0/0:19:19,0:50:0,90,899:..	0/0:22:22,0:50:0,75,749:..	0/0:22:22,0:50:0,75,749:..	0/0:27:27,0:50:0,99,989:..	0/0:21:21,0:48:0,90,1139:..	0/0:19:19,0:50:0,117,1169:..	0/0:16:16,0:48:0,51,509:..	0/0:17:17,0:48:0,66,659:..	0/0:20:20,0:50:0,87,869:..	0/0:23:23,0:48:0,75,749:..	0/0:19:19,0:50:0,75,749:..	0/0:18:18,0:48:0,126,1259:..	0/0:20:20,0:50:0,75,749:..	0/0:19:19,0:50:0,66,659:..	0/0:24:24,0:50:0,81,809:..	0/0:22:22,0:50:0,78,779:..	0/0:29:29,0:50:0,117,1169:..	0/0:20:20,0:48:0,75,749:..	seq2
chr11	17551955	chr11_17551955_C_T	C	T	43	AF=0.013889;AQ=43	GT:DP:AD:GQ:PL:RNC	0/0:25:25,0:50:0,75,749:..	0/0:22:22,0:48:0,69,689:..	0/0:23:23,0:48:0,54,779:..	0/0:28:28,0:50:0,84,839:..	0/0:25:25,0:50:0,75,749:..	0/0:21:21,0:50:0,66,659:..	0/0:25:25,0:50:0,78,779:..	0/0:19:19,0:50:0,60,599:..	0/0:20:20,0:50:0,63,629:..	0/0:30:30,0:50:0,90,899:..	0/0:25:25,0:48:0,75,749:..	0/0:26:26,0:50:0,87,869:..	0/0:23:23,0:39:0,39,629:..	0/0:24:24,0:50:0,66,899:..	0/0:27:27,0:50:0,93,929:..	0/0:22:22,0:48:0,66,659:..	0/0:23:23,0:50:0,69,689:..	0/0:26:26,0:50:0,81,809:..	0/0:22:22,0:50:0,66,659:..	0/0:16:16,0:48:0,48,479:..	0/0:24:24,0:50:0,72,719:..	0/0:31:31,0:50:0,102,1019:..	0/1:21:10,11:43:43,0,52:..	0/0:17:17,0:50:0,60,599:..	0/0:23:23,0:48:0,72,719:..	0/0:25:25,0:48:0,78,779:..	0/0:24:24,0:50:0,72,719:..	0/0:25:25,0:50:0,75,749:..	0/0:23:23,0:48:0,75,749:..	0/0:19:19,0:50:0,66,659:..	0/0:27:27,0:50:0,96,959:..	0/0:19:19,0:50:0,57,569:..	0/0:21:21,0:50:0,75,749:..	0/0:28:28,0:50:0,93,929:..	0/0:16:16,0:48:0,48,479:..	0/0:26:26,0:50:0,96,959:..	seq2
chr11	22999630	chr11_22999630_C_T	C	T	47	AF=0.013889;AQ=47	GT:DP:AD:GQ:PL:RNC	0/0:16:16,0:48:0,66,659:..	0/0:14:14,0:42:0,42,419:..	0/0:20:20,0:50:0,60,599:..	0/0:24:24,0:50:0,90,899:..	0/0:22:22,0:50:0,66,659:..	0/0:16:16,0:48:0,81,809:..	0/0:20:20,0:50:0,63,629:..	0/0:16:16,0:48:0,48,479:..	0/0:18:18,0:50:0,66,659:..	0/0:24:24,0:48:0,93,929:..	0/1:28:7,21:45:47,0,47:..	0/0:23:23,0:48:0,69,689:..	0/0:21:21,0:48:0,66,659:..	0/0:23:23,0:48:0,69,689:..	0/0:25:25,0:50:0,99,989:..	0/0:22:22,0:48:0,69,689:..	0/0:21:21,0:50:0,90,899:..	0/0:22:22,0:50:0,78,779:..	0/0:16:16,0:48:0,60,599:..	0/0:23:23,0:50:0,87,869:..	0/0:26:26,0:50:0,81,809:..	0/0:24:24,0:50:0,114,1139:..	0/0:16:16,0:48:0,66,659:..	0/0:20:20,0:50:0,75,749:..	0/0:19:19,0:50:0,72,719:..	0/0:19:19,0:50:0,69,689:..	0/0:24:24,0:48:0,75,749:..	0/0:16:16,0:48:0,51,509:..	0/0:16:16,0:48:0,48,479:..	0/0:22:22,0:48:0,72,719:..	0/0:24:24,0:48:0,72,719:..	0/0:20:20,0:50:0,60,599:..	0/0:22:22,0:50:0,66,659:..	0/0:16:16,0:48:0,72,719:..	0/0:18:18,0:48:0,66,659:..	0/0:24:24,0:50:0,72,719:..	seq2
chr11	23889519	chr11_23889519_G_A	G	A	17	AF=0.013889;AQ=17	GT:DP:AD:GQ:PL:RNC	0/0:16:16,0:48:0,66,659:..	0/0:13:13,0:39:0,39,389:..	0/0:16:16,0:48:0,51,509:..	0/0:12:12,0:36:0,39,389:..	0/0:23:23,0:48:0,75,749:..	0/0:18:18,0:50:0,54,539:..	0/0:22:22,0:50:0,66,659:..	0/0:20:20,0:50:0,60,599:..	0/0:16:16,0:48:0,57,569:..	0/0:24:24,0:50:0,84,839:..	0/0:14:14,0:42:0,42,419:..	0/0:16:16,0:18:0,18,419:..	0/0:18:18,0:50:0,72,719:..	0/0:14:14,0:42:0,42,419:..	0/0:21:21,0:50:0,69,689:..	0/0:13:13,0:39:0,39,389:..	0/0:23:23,0:50:0,69,689:..	0/0:12:12,0:36:0,39,389:..	0/0:16:16,0:48:0,48,479:..	0/0:13:13,0:39:0,39,389:..	0/0:16:16,0:48:0,48,479:..	0/1:16:13,3:18:17,0,44:..	0/0:16:16,0:18:0,18,419:..	0/0:24:24,0:50:0,72,719:..	0/0:18:18,0:50:0,54,539:..	0/0:21:21,0:50:0,63,629:..	0/0:20:20,0:30:0,30,539:..	0/0:16:16,0:48:0,54,539:..	0/0:23:23,0:48:0,78,779:..	0/0:16:16,0:48:0,48,479:..	0/0:23:23,0:50:0,69,689:..	0/0:14:14,0:42:0,42,419:..	0/0:17:17,0:50:0,51,509:..	0/0:16:16,0:48:0,48,479:..	0/0:14:14,0:42:0,42,419:..	0/0:21:21,0:50:0,63,629:..	seq2
chr11	36215276	chr11_36215276_A_G	A	G	14	AF=0.013889;AQ=14	GT:DP:AD:GQ:PL:RNC	0/0:25:25,0:50:0,87,869:..	0/0:19:19,0:50:0,60,599:..	0/0:17:17,0:50:0,69,689:..	0/0:21:21,0:48:0,69,689:..	0/0:21:21,0:50:0,75,749:..	0/0:16:16,0:48:0,72,719:..	0/0:17:17,0:50:0,75,749:..	0/0:18:18,0:50:0,63,629:..	0/0:17:17,0:50:0,87,869:..	0/0:25:25,0:48:0,108,1079:..	0/1:18:14,4:15:14,0,41:..	0/0:18:18,0:48:0,72,719:..	0/0:23:23,0:50:0,84,839:..	0/0:21:21,0:50:0,102,1019:..	0/0:20:20,0:48:0,75,749:..	0/0:22:22,0:48:0,69,689:..	0/0:24:24,0:50:0,99,989:..	0/0:19:19,0:50:0,57,569:..	0/0:22:22,0:50:0,66,659:..	0/0:22:22,0:50:0,108,1079:..	0/0:20:20,0:48:0,60,599:..	0/0:25:25,0:50:0,108,1079:..	0/0:22:22,0:50:0,66,659:..	0/0:23:23,0:48:0,111,1109:..	0/0:21:21,0:48:0,75,749:..	0/0:19:19,0:50:0,87,869:..	0/0:27:27,0:50:0,117,1169:..	0/0:24:24,0:50:0,75,749:..	0/0:22:22,0:50:0,66,659:..	0/0:20:20,0:48:0,69,689:..	0/0:22:22,0:48:0,66,659:..	0/0:21:21,0:50:0,75,749:..	0/0:16:16,0:48:0,66,659:..	0/0:22:22,0:50:0,96,959:..	0/0:17:17,0:50:0,60,599:..	0/0:21:21,0:50:0,72,719:..	seq2
chr11	39563189	chr11_39563189_T_A	T	A	44	AF=0.013889;AQ=44	GT:DP:AD:GQ:PL:RNC	0/0:24:24,0:50:0,75,749:..	0/0:20:20,0:50:0,63,629:..	0/0:23:23,0:50:0,69,689:..	0/0:17:17,0:48:0,63,629:..	0/0:25:25,0:50:0,93,929:..	0/0:22:22,0:50:0,69,689:..	0/0:19:19,0:50:0,84,839:..	0/0:16:16,0:48:0,72,719:..	0/0:16:16,0:48:0,117,1169:..	0/0:23:23,0:48:0,93,929:..	0/0:16:16,0:48:0,90,899:..	0/0:19:19,0:48:0,87,869:..	0/0:18:18,0:50:0,54,539:..	0/0:22:22,0:50:0,78,779:..	0/0:19:19,0:50:0,90,899:..	0/0:24:24,0:50:0,75,749:..	0/0:23:23,0:50:0,78,779:..	0/0:16:16,0:48:0,96,959:..	0/0:21:21,0:48:0,72,719:..	0/0:17:17,0:50:0,57,569:..	0/0:23:23,0:50:0,111,1109:..	0/0:25:25,0:48:0,78,779:..	0/0:24:24,0:48:0,78,779:..	0/0:21:21,0:50:0,66,659:..	0/0:20:20,0:50:0,72,719:..	0/0:18:18,0:50:0,102,1019:..	0/0:26:26,0:50:0,93,929:..	0/0:21:21,0:48:0,63,629:..	0/1:26:10,16:43:44,0,46:..	0/0:18:18,0:50:0,81,809:..	0/0:25:25,0:48:0,111,1109:..	0/0:20:20,0:50:0,60,599:..	0/0:16:16,0:48:0,48,479:..	0/0:22:22,0:48:0,66,659:..	0/0:21:21,0:50:0,66,659:..	0/0:23:23,0:50:0,72,719:..	seq2
chr11	41841803	chr11_41841803_G_A	G	A	37	AF=0.013889;AQ=37	GT:DP:AD:GQ:PL:RNC	0/0:17:17,0:50:0,54,539:..	0/0:16:16,0:48:0,63,629:..	0/0:21:21,0:50:0,72,719:..	0/0:21:21,0:48:0,63,629:..	0/0:21:21,0:50:0,75,749:..	0/0:23:23,0:50:0,69,689:..	0/0:23:23,0:50:0,72,719:..	0/0:16:16,0:48:0,78,779:..	0/1:17:6,11:38:37,0,52:..	0/0:19:19,0:50:0,69,689:..	0/0:21:21,0:50:0,78,779:..	0/0:20:20,0:48:0,75,749:..	0/0:26:26,0:50:0,81,809:..	0/0:27:27,0:50:0,108,1079:..	0/0:22:22,0:36:0,39,629:..	0/0:16:16,0:48:0,51,509:..	0/0:24:24,0:50:0,72,719:..	0/0:17:17,0:50:0,60,599:..	0/0:26:26,0:50:0,81,809:..	0/0:16:16,0:48:0,54,539:..	0/0:23:23,0:50:0,75,749:..	0/0:24:24,0:50:0,96,959:..	0/0:18:18,0:48:0,75,749:..	0/0:23:23,0:50:0,96,959:..	0/0:20:20,0:50:0,60,599:..	0/0:25:25,0:50:0,78,779:..	0/0:21:21,0:50:0,63,629:..	0/0:16:16,0:48:0,48,479:..	0/0:22:22,0:50:0,69,689:..	0/0:18:18,0:48:0,63,629:..	0/0:23:23,0:50:0,69,689:..	0/0:22:22,0:50:0,75,749:..	0/0:24:24,0:50:0,72,719:..	0/0:16:16,0:48:0,48,479:..	0/0:18:18,0:50:0,54,539:..	0/0:22:22,0:50:0,72,719:..	seq2
chr11	42689381	chr11_42689381_G_A	G	A	19	AF=0.013889;AQ=19	GT:DP:AD:GQ:PL:RNC	0/0:16:16,0:48:0,54,539:..	0/0:24:24,0:50:0,72,719:..	0/0:16:16,0:48:0,48,479:..	0/0:16:16,0:48:0,48,479:..	0/0:20:20,0:48:0,69,689:..	0/0:16:16,0:48:0,48,479:..	0/0:16:16,0:48:0,48,479:..	0/0:17:17,0:50:0,51,509:..	0/0:18:18,0:50:0,57,569:..	0/0:24:24,0:48:0,75,749:..	0/0:16:16,0:48:0,48,479:..	0/0:21:21,0:50:0,63,629:..	0/0:19:19,0:50:0,69,689:..	0/0:16:16,0:48:0,48,479:..	0/0:16:16,0:48:0,48,479:..	0/0:22:22,0:48:0,69,689:..	0/0:21:21,0:50:0,63,629:..	0/0:16:16,0:48:0,48,479:..	0/0:18:18,0:50:0,54,539:..	0/0:16:16,0:48:0,48,479:..	0/0:21:21,0:48:0,72,719:..	0/0:21:21,0:48:0,63,629:..	0/0:17:17,0:50:0,66,659:..	0/0:16:16,0:48:0,48,479:..	0/0:20:20,0:50:0,69,689:..	0/0:11:11,0:33:0,33,329:..	0/0:21:21,0:48:0,63,629:..	0/0:16:16,0:48:0,51,509:..	0/1:18:7,11:15:19,0,16:..	0/0:16:16,0:48:0,48,479:..	0/0:22:22,0:50:0,69,689:..	0/0:16:16,0:48:0,48,479:..	0/0:18:18,0:50:0,60,599:..	0/0:16:16,0:48:0,48,479:..	0/0:18:18,0:50:0,54,539:..	0/0:18:18,0:50:0,63,629:..	seq2
chr11	49469211	chr11_49469211_A_G	A	G	39	AF=0.013889;AQ=39	GT:DP:AD:GQ:PL:RNC	0/0:22:22,0:50:0,69,689:..	0/0:25:25,0:50:0,75,749:..	0/0:20:20,0:50:0,78,779:..	0/0:27:27,0:50:0,93,929:..	0/0:20:20,0:50:0,72,719:..	0/0:24:24,0:48:0,111,1109:..	0/0:22:22,0:50:0,81,809:..	0/0:16:16,0:48:0,63,629:..	0/0:20:20,0:50:0,63,629:..	0/0:22:22,0:50:0,87,869:..	0/0:17:17,0:50:0,102,1019:..	0/0:28:28,0:48:0,99,989:..	0/0:21:21,0:50:0,78,779:..	0/0:20:20,0:50:0,75,989:..	0/0:25:25,0:50:0,105,1049:..	0/0:24:24,0:48:0,78,779:..	0/0:26:26,0:50:0,108,1079:..	0/0:16:16,0:48:0,69,689:..	0/0:21:21,0:50:0,99,989:..	0/0:22:22,0:48:0,72,719:..	0/0:22:22,0:48:0,102,1019:..	0/0:24:24,0:48:0,102,1019:..	0/0:22:22,0:50:0,99,989:..	0/0:25:25,0:50:0,90,899:..	0/0:21:21,0:50:0,72,719:..	0/0:21:21,0:50:0,75,749:..	0/0:24:24,0:50:0,69,929:..	0/0:24:24,0:48:0,84,839:..	0/0:21:21,0:50:0,93,929:..	0/0:24:24,0:48:0,108,1079:..	0/0:31:31,0:50:0,138,1379:..	0/0:16:16,0:48:0,60,599:..	0/0:22:22,0:50:0,111,1109:..	0/0:21:21,0:50:0,90,899:..	0/1:26:14,12:40:39,0,53:..	0/0:22:22,0:50:0,90,899:..	seq2
chr11	50641366	chr11_50641366_C_T	C	T	38	AF=0.013889;AQ=38	GT:DP:AD:GQ:PL:RNC	0/0:23:23,0:50:0,69,689:..	0/0:25:25,0:50:0,75,749:..	0/0:20:20,0:50:0,60,599:..	0/0:21:21,0:33:0,33,569:..	0/0:14:14,0:42:0,42,419:..	0/0:24:24,0:50:0,72,719:..	0/0:24:24,0:50:0,72,719:..	0/0:22:22,0:50:0,84,839:..	0/0:15:15,0:45:0,45,449:..	0/0:21:21,0:50:0,63,629:..	0/0:20:20,0:50:0,60,599:..	0/0:33:33,0:39:0,39,869:..	0/0:23:23,0:50:0,72,719:..	0/0:25:25,0:48:0,75,749:..	0/0:26:26,0:50:0,78,779:..	0/0:19:19,0:50:0,57,569:..	0/0:17:17,0:50:0,51,509:..	0/0:19:19,0:50:0,60,599:..	0/0:21:21,0:48:0,63,629:..	0/1:18:7,11:38:38,0,49:..	0/0:16:16,0:48:0,48,479:..	0/0:32:32,0:50:0,96,959:..	0/0:24:24,0:50:0,72,719:..	0/0:23:23,0:48:0,72,719:..	0/0:18:18,0:50:0,54,539:..	0/0:28:28,0:50:0,84,839:..	0/0:23:23,0:50:0,69,689:..	0/0:25:25,0:50:0,75,749:..	0/0:16:16,0:48:0,48,479:..	0/0:17:17,0:50:0,51,509:..	0/0:24:24,0:50:0,84,839:..	0/0:20:20,0:50:0,60,599:..	0/0:18:18,0:24:0,24,479:..	0/0:23:23,0:50:0,69,689:..	0/0:19:19,0:27:0,27,509:..	0/0:22:22,0:50:0,69,689:..	seq2
chr11	57941990	chr11_57941990_G_A	G	A	46	AF=0.013889;AQ=46	GT:DP:AD:GQ:PL:RNC	0/0:23:23,0:48:0,75,749:..	0/0:28:28,0:50:0,96,959:..	0/0:19:19,0:50:0,69,689:..	0/0:25:25,0:50:0,75,749:..	0/0:24:24,0:50:0,72,719:..	0/0:26:26,0:48:0,87,869:..	0/0:25:25,0:50:0,75,749:..	0/0:20:20,0:50:0,63,629:..	0/0:20:20,0:48:0,72,719:..	0/0:26:26,0:50:0,81,809:..	0/0:20:20,0:50:0,63,629:..	0/0:32:32,0:50:0,102,1019:..	0/0:18:18,0:48:0,60,599:..	0/1:37:18,19:46:46,0,54:..	0/0:22:22,0:50:0,66,659:..	0/0:32:32,0:50:0,96,959:..	0/0:25:25,0:50:0,99,989:..	0/0:21:21,0:48:0,63,629:..	0/0:19:19,0:50:0,57,569:..	0/0:22:22,0:48:0,90,899:..	0/0:22:22,0:48:0,93,929:..	0/0:33:33,0:50:0,99,989:..	0/0:24:24,0:50:0,75,749:..	0/0:32:32,0:50:0,102,1019:..	0/0:33:33,0:50:0,102,1019:..	0/0:24:24,0:50:0,84,839:..	0/0:25:25,0:48:0,48,719:..	0/0:24:24,0:48:0,72,719:..	0/0:22:22,0:48:0,66,659:..	0/0:19:19,0:50:0,72,719:..	0/0:20:20,0:50:0,60,599:..	0/0:27:27,0:50:0,93,929:..	0/0:22:22,0:48:0,75,749:..	0/0:19:19,0:50:0,72,719:..	0/0:19:19,0:50:0,66,659:..	0/0:22:22,0:50:0,66,659:..	seq2
chr11	64069875	chr11_64069875_C_A	C	A	36	AF=0.013889;AQ=36	GT:DP:AD:GQ:PL:RNC	0/0:19:19,0:50:0,72,719:..	0/0:16:16,0:48:0,63,629:..	0/0:23:23,0:50:0,72,719:..	0/0:26:26,0:50:0,78,779:..	0/0:16:16,0:48:0,60,599:..	0/0:22:22,0:48:0,72,719:..	0/0:20:20,0:50:0,75,749:..	0/0:20:20,0:50:0,63,629:..	0/0:20:20,0:50:0,63,629:..	0/0:16:16,0:48:0,48,479:..	0/0:16:16,0:48:0,48,479:..	0/0:21:21,0:48:0,72,719:..	0/0:18:18,0:50:0,60,599:..	0/0:25:25,0:50:0,96,959:..	0/0:22:22,0:50:0,66,659:..	0/0:17:17,0:50:0,57,569:..	0/1:34:19,15:36:36,0,50:..	0/0:22:22,0:48:0,72,719:..	0/0:14:14,0:42:0,42,419:..	0/0:16:16,0:48:0,93,929:..	0/0:25:25,0:50:0,96,959:..	0/0:17:17,0:50:0,66,659:..	0/0:21:21,0:50:0,75,749:..	0/0:27:27,0:50:0,84,839:..	0/0:21:21,0:50:0,93,929:..	0/0:21:21,0:50:0,69,689:..	0/0:23:23,0:48:0,72,719:..	0/0:17:17,0:48:0,54,539:..	0/0:16:16,0:48:0,72,719:..	0/0:16:16,0:48:0,48,479:..	0/0:20:20,0:48:0,60,599:..	0/0:22:22,0:50:0,66,659:..	0/0:20:20,0:50:0,63,629:..	0/0:21:21,0:50:0,66,659:..	0/0:23:23,0:50:0,72,719:..	0/0:16:16,0:48:0,63,629:..	seq2
chr11	64711915	chr11_64711915_T_C	T	C	42	AF=0.013889;AQ=42	GT:DP:AD:GQ:PL:RNC	0/0:20:20,0:50:0,66,659:..	0/0:22:22,0:50:0,78,779:..	0/0:34:34,0:50:0,75,989:..	0/0:22:22,0:50:0,102,1019:..	0/0:28:28,0:50:0,90,899:..	0/0:23:23,0:48:0,75,749:..	0/0:31:31,0:50:0,66,899:..	0/0:25:25,0:50:0,81,809:..	0/0:20:20,0:50:0,63,629:..	0/0:44:44,0:50:0,147,1469:..	0/0:29:29,0:50:0,96,959:..	0/0:23:23,0:48:0,69,689:..	0/0:27:27,0:50:0,84,839:..	0/0:32:32,0:50:0,96,959:..	0/0:44:44,0:50:0,132,1319:..	0/0:30:30,0:50:0,99,989:..	0/0:25:25,0:50:0,81,809:..	0/0:28:28,0:50:0,57,809:..	0/0:28:28,0:50:0,102,1019:..	0/0:37:37,0:50:0,123,1229:..	0/0:26:26,0:48:0,60,839:..	0/0:22:22,0:50:0,66,659:..	0/0:31:31,0:50:0,93,929:..	0/0:23:23,0:50:0,69,689:..	0/0:23:23,0:48:0,69,689:..	0/0:37:37,0:50:0,117,1169:..	0/0:37:37,0:50:0,81,1049:..	0/1:30:13,17:41:42,0,46:..	0/0:25:25,0:48:0,75,749:..	0/0:25:25,0:50:0,96,959:..	0/0:43:43,0:50:0,135,1349:..	0/0:30:30,0:50:0,66,899:..	0/0:26:26,0:50:0,78,779:..	0/0:27:27,0:50:0,93,929:..	0/0:31:31,0:50:0,99,989:..	0/0:25:25,0:50:0,108,1079:..	seq2
chr11	66081449	chr11_66081449_C_T	C	T	49	AF=0.013889;AQ=49	GT:DP:AD:GQ:PL:RNC	0/0:26:26,0:50:0,78,779:..	0/0:23:23,0:48:0,90,899:..	0/0:24:24,0:50:0,99,989:..	0/0:24:24,0:50:0,87,869:..	0/0:21:21,0:48:0,63,629:..	0/0:22:22,0:48:0,75,749:..	0/0:21:21,0:50:0,75,749:..	0/0:19:19,0:50:0,63,629:..	0/0:21:21,0:50:0,90,899:..	0/0:23:23,0:48:0,75,749:..	0/0:25:25,0:48:0,75,749:..	0/0:20:20,0:48:0,96,959:..	0/0:23:23,0:50:0,102,1019:..	0/0:17:17,0:50:0,72,719:..	0/1:26:8,18:47:49,0,51:..	0/0:21:21,0:50:0,75,749:..	0/0:21:21,0:48:0,75,749:..	0/0:20:20,0:48:0,75,749:..	0/0:22:22,0:50:0,72,719:..	0/0:23:23,0:50:0,54,779:..	0/0:26:26,0:50:0,78,779:..	0/0:24:24,0:50:0,117,1169:..	0/0:26:26,0:50:0,51,749:..	0/0:21:21,0:48:0,78,779:..	0/0:24:24,0:48:0,69,929:..	0/0:19:19,0:27:0,27,509:..	0/0:23:23,0:50:0,72,719:..	0/0:21:21,0:48:0,72,719:..	0/0:22:22,0:50:0,69,689:..	0/0:22:22,0:48:0,66,659:..	0/0:20:20,0:48:0,60,599:..	0/0:24:24,0:48:0,75,749:..	0/0:19:19,0:50:0,69,689:..	0/0:24:24,0:50:0,75,749:..	0/0:20:20,0:30:0,30,539:..	0/0:21:21,0:50:0,72,719:..	seq2
chr11	76768057	chr11_76768057_C_A	C	A	27	AF=0.013889;AQ=27	GT:DP:AD:GQ:PL:RNC	0/0:24:24,0:50:0,72,719:..	0/0:24:24,0:42:0,42,659:..	0/0:23:23,0:48:0,75,749:..	0/0:20:20,0:50:0,84,839:..	0/0:22:22,0:50:0,99,989:..	0/0:24:24,0:50:0,135,1349:..	0/0:19:19,0:48:0,57,569:..	0/0:18:18,0:50:0,66,659:..	0/0:20:20,0:50:0,63,629:..	0/0:18:18,0:50:0,72,719:..	0/0:24:24,0:48:0,75,749:..	0/0:22:22,0:48:0,48,719:..	0/0:33:33,0:50:0,102,1019:..	0/0:18:18,0:50:0,93,929:..	0/0:26:26,0:50:0,96,959:..	0/0:24:24,0:50:0,105,1049:..	0/0:25:25,0:48:0,111,1109:..	0/0:17:17,0:50:0,57,569:..	0/0:24:24,0:50:0,84,839:..	0/0:18:18,0:50:0,75,749:..	0/0:25:25,0:48:0,96,959:..	0/0:22:22,0:50:0,111,1109:..	0/0:25:25,0:48:0,87,869:..	0/0:22:22,0:50:0,99,989:..	0/0:26:26,0:50:0,84,1079:..	0/0:22:22,0:48:0,105,1049:..	0/0:25:25,0:48:0,114,1139:..	0/0:25:25,0:45:0,45,689:..	0/0:23:23,0:48:0,93,929:..	0/0:22:22,0:50:0,72,719:..	0/0:21:21,0:50:0,99,989:..	0/0:22:22,0:48:0,66,659:..	0/0:25:25,0:48:0,99,989:..	0/0:24:24,0:50:0,108,1079:..	0/0:26:26,0:50:0,102,1019:..	0/1:29:19,10:27:27,0,48:..	seq2
chr11	85741870	chr11_85741870_G_A	G	A	41	AF=0.013889;AQ=41	GT:DP:AD:GQ:PL:RNC	0/0:25:25,0:50:0,87,869:..	0/0:20:20,0:50:0,60,599:..	0/0:23:23,0:48:0,72,719:..	0/0:25:25,0:48:0,108,1079:..	0/0:25:25,0:50:0,75,749:..	0/0:30:30,0:50:0,102,1019:..	0/0:25:25,0:48:0,78,779:..	0/0:19:19,0:50:0,60,599:..	0/0:25:25,0:50:0,87,869:..	0/0:26:26,0:50:0,51,749:..	0/0:24:24,0:50:0,96,959:..	0/0:30:30,0:50:0,105,1049:..	0/0:24:24,0:48:0,72,719:..	0/0:21:21,0:48:0,102,1019:..	0/0:25:25,0:50:0,75,749:..	0/1:24:13,11:41:41,0,55:..	0/0:29:29,0:50:0,111,1109:..	0/0:22:22,0:48:0,69,689:..	0/0:17:17,0:48:0,78,779:..	0/0:23:23,0:48:0,90,899:..	0/0:24:24,0:50:0,75,749:..	0/0:21:21,0:50:0,93,929:..	0/0:22:22,0:48:0,66,659:..	0/0:29:29,0:50:0,99,989:..	0/0:25:25,0:45:0,45,689:..	0/0:30:30,0:50:0,108,1079:..	0/0:26:26,0:48:0,87,869:..	0/0:21:21,0:48:0,81,809:..	0/0:28:28,0:50:0,102,1019:..	0/0:24:24,0:50:0,75,749:..	0/0:26:26,0:50:0,81,809:..	0/0:23:23,0:50:0,69,689:..	0/0:27:27,0:50:0,93,929:..	0/0:22:22,0:50:0,93,929:..	0/0:24:24,0:50:0,78,779:..	0/0:23:23,0:50:0,69,689:..	seq2
chr11	91216534	chr11_91216534_C_T	C	T	42	AF=0.013889;AQ=42	GT:DP:AD:GQ:PL:RNC	0/0:24:24,0:50:0,75,749:..	0/0:16:16,0:48:0,48,479:..	0/0:18:18,0:48:0,57,569:..	0/0:16:16,0:48:0,57,569:..	0/0:24:24,0:50:0,75,749:..	0/0:22:22,0:50:0,69,689:..	0/0:21:21,0:50:0,63,629:..	0/0:22:22,0:48:0,75,749:..	0/0:16:16,0:48:0,57,569:..	0/0:23:23,0:48:0,81,809:..	0/0:18:18,0:50:0,57,569:..	0/0:24:24,0:42:0,42,659:..	0/0:21:21,0:48:0,102,1019:..	0/0:21:21,0:50:0,69,689:..	0/0:25:25,0:48:0,78,779:..	0/0:24:24,0:50:0,75,749:..	0/1:25:12,13:42:42,0,52:..	0/0:21:21,0:50:0,69,689:..	0/0:23:23,0:48:0,72,719:..	0/0:25:25,0:50:0,75,749:..	0/0:17:17,0:50:0,54,539:..	0/0:23:23,0:48:0,75,749:..	0/0:24:24,0:42:0,42,659:..	0/0:24:24,0:48:0,72,719:..	0/0:22:22,0:50:0,96,959:..	0/0:23:23,0:48:0,72,719:..	0/0:20:20,0:50:0,63,629:..	0/0:21:21,0:50:0,84,839:..	0/0:23:23,0:48:0,72,719:..	0/0:14:14,0:42:0,42,419:..	0/0:25:25,0:48:0,69,929:..	0/0:21:21,0:48:0,78,779:..	0/0:18:18,0:50:0,69,689:..	0/0:12:12,0:36:0,39,389:..	0/0:22:22,0:50:0,72,719:..	0/0:23:23,0:39:0,39,629:..	seq2
chr11	95451173	chr11_95451173_G_A	G	A	51	AF=0.013889;AQ=51	GT:DP:AD:GQ:PL:RNC	0/0:22:22,0:50:0,72,719:..	0/0:16:16,0:48:0,51,509:..	0/0:24:24,0:48:0,99,989:..	0/0:19:19,0:50:0,75,749:..	0/0:27:27,0:50:0,114,1139:..	0/0:21:21,0:50:0,87,869:..	0/0:24:24,0:50:0,72,719:..	0/0:16:16,0:48:0,75,749:..	0/0:16:16,0:48:0,63,629:..	0/0:22:22,0:50:0,99,989:..	0/0:19:19,0:50:0,75,749:..	0/0:25:25,0:48:0,120,1199:..	0/0:25:25,0:50:0,81,809:..	0/0:23:23,0:48:0,72,719:..	0/0:17:17,0:48:0,51,509:..	0/0:24:24,0:48:0,78,1019:..	0/0:23:23,0:50:0,114,1139:..	0/0:22:22,0:50:0,75,749:..	0/0:24:24,0:48:0,72,719:..	0/0:22:22,0:50:0,75,749:..	0/0:20:20,0:50:0,60,599:..	0/1:30:14,16:51:51,0,58:..	0/0:21:21,0:48:0,69,689:..	0/0:22:22,0:50:0,75,749:..	0/0:21:21,0:50:0,63,629:..	0/0:20:20,0:50:0,105,1049:..	0/0:22:22,0:48:0,93,929:..	0/0:25:25,0:48:0,75,749:..	0/0:18:18,0:48:0,72,719:..	0/0:23:23,0:48:0,96,959:..	0/0:19:19,0:50:0,93,929:..	0/0:21:21,0:50:0,81,809:..	0/0:23:23,0:50:0,117,1169:..	0/0:16:16,0:48:0,48,479:..	0/0:25:25,0:50:0,99,989:..	0/0:23:23,0:48:0,120,1199:..	seq2
chr11	101708351	chr11_101708351_C_T	C	T	46	AF=0.013889;AQ=46	GT:DP:AD:GQ:PL:RNC	0/0:22:22,0:50:0,69,689:..	0/0:16:16,0:48:0,72,719:..	0/0:22:22,0:48:0,66,659:..	0/0:16:16,0:48:0,54,539:..	0/0:17:17,0:48:0,99,989:..	0/0:22:22,0:50:0,72,719:..	0/0:20:20,0:50:0,60,599:..	0/0:16:16,0:48:0,63,629:..	0/0:17:17,0:50:0,69,689:..	0/0:24:24,0:48:0,75,749:..	0/0:26:26,0:50:0,120,1199:..	0/1:40:15,25:45:46,0,49:..	0/0:25:25,0:50:0,87,869:..	0/0:22:22,0:50:0,72,719:..	0/0:24:24,0:48:0,102,1019:..	0/0:24:24,0:50:0,57,809:..	0/0:22:22,0:50:0,75,749:..	0/0:20:20,0:50:0,72,719:..	0/0:28:28,0:50:0,99,989:..	0/0:19:19,0:48:0,93,929:..	0/0:21:21,0:50:0,63,629:..	0/0:26:26,0:50:0,90,899:..	0/0:21:21,0:50:0,69,689:..	0/0:21:21,0:50:0,66,659:..	0/0:16:16,0:48:0,48,479:..	0/0:26:26,0:50:0,81,809:..	0/0:27:27,0:50:0,75,989:..	0/0:20:20,0:50:0,60,599:..	0/0:24:24,0:48:0,102,1019:..	0/0:24:24,0:48:0,72,719:..	0/0:26:26,0:48:0,96,959:..	0/0:17:17,0:50:0,51,509:..	0/0:24:24,0:50:0,90,899:..	0/0:23:23,0:48:0,72,719:..	0/0:19:19,0:50:0,63,629:..	0/0:19:19,0:48:0,99,989:..	seq2
chr11	111092190	chr11_111092190_C_T	C	T	43	AF=0.013889;AQ=43	GT:DP:AD:GQ:PL:RNC	0/0:24:24,0:48:0,111,1109:..	0/0:21:21,0:48:0,99,989:..	0/0:22:22,0:50:0,117,1169:..	0/0:23:23,0:50:0,75,749:..	0/0:24:24,0:50:0,90,899:..	0/0:19:19,0:48:0,72,719:..	0/0:20:20,0:48:0,84,839:..	0/0:23:23,0:48:0,78,779:..	0/0:23:23,0:50:0,75,749:..	0/0:21:21,0:50:0,75,749:..	0/0:24:24,0:48:0,72,719:..	0/0:33:33,0:50:0,105,1049:..	0/0:22:22,0:50:0,72,719:..	0/0:21:21,0:50:0,72,719:..	0/0:23:23,0:48:0,69,689:..	0/0:18:18,0:48:0,72,719:..	0/0:22:22,0:50:0,123,1229:..	0/0:19:19,0:50:0,96,959:..	0/0:24:24,0:50:0,78,779:..	0/0:23:23,0:50:0,75,749:..	0/0:31:31,0:50:0,111,1109:..	0/0:23:23,0:50:0,93,929:..	0/0:16:16,0:48:0,48,479:..	0/0:24:24,0:48:0,96,959:..	0/0:16:16,0:48:0,48,479:..	0/0:21:21,0:48:0,75,749:..	0/0:22:22,0:50:0,75,749:..	0/1:33:15,18:43:43,0,54:..	0/0:23:23,0:50:0,90,899:..	0/0:22:22,0:48:0,84,839:..	0/0:23:23,0:50:0,69,689:..	0/0:20:20,0:50:0,63,629:..	0/0:25:25,0:50:0,132,1319:..	0/0:23:23,0:48:0,75,749:..	0/0:23:23,0:50:0,75,749:..	0/0:28:28,0:50:0,102,1019:..	seq2
chr11	112035361	chr11_112035361_G_A	G	A	28	AF=0.013889;AQ=28	GT:DP:AD:GQ:PL:RNC	0/0:18:18,0:50:0,75,749:..	0/0:22:22,0:50:0,72,719:..	0/0:16:16,0:48:0,72,719:..	0/0:25:25,0:50:0,75,749:..	0/0:16:16,0:48:0,51,509:..	0/0:18:18,0:50:0,66,659:..	0/0:24:24,0:50:0,72,719:..	0/0:16:16,0:48:0,66,659:..	0/0:17:17,0:50:0,69,689:..	0/0:19:19,0:27:0,27,509:..	0/0:16:16,0:48:0,75,749:..	0/0:24:24,0:48:0,75,749:..	0/0:21:21,0:50:0,69,689:..	0/0:16:16,0:48:0,48,479:..	0/0:24:24,0:48:0,141,1409:..	0/0:24:24,0:50:0,81,809:..	0/0:22:22,0:50:0,75,749:..	0/0:17:17,0:50:0,72,719:..	0/1:18:12,6:29:28,0,48:..	0/0:23:23,0:50:0,93,929:..	0/0:20:20,0:50:0,78,779:..	0/0:24:24,0:48:0,72,719:..	0/0:20:20,0:50:0,60,599:..	0/0:23:23,0:48:0,93,929:..	0/0:22:22,0:50:0,69,689:..	0/0:16:16,0:48:0,75,749:..	0/0:23:23,0:50:0,96,959:..	0/0:18:18,0:48:0,63,629:..	0/0:21:21,0:50:0,102,1019:..	0/0:17:17,0:50:0,99,989:..	0/0:28:28,0:50:0,99,989:..	0/0:16:16,0:48:0,48,479:..	0/0:24:24,0:50:0,90,899:..	0/0:20:20,0:50:0,66,659:..	0/0:20:20,0:30:0,30,539:..	0/0:20:20,0:50:0,108,1079:..	seq2
chr11	121363780	chr11_121363780_G_A	G	A	23	AF=0.013889;AQ=23	GT:DP:AD:GQ:PL:RNC	0/0:21:21,0:48:0,87,869:..	0/0:16:16,0:48:0,105,1049:..	0/0:24:24,0:50:0,72,719:..	0/0:26:26,0:48:0,84,839:..	0/0:21:21,0:50:0,72,719:..	0/0:23:23,0:48:0,75,989:..	0/0:14:14,0:42:0,42,419:..	0/0:18:18,0:50:0,96,959:..	0/0:20:20,0:50:0,75,749:..	0/0:24:24,0:50:0,93,929:..	0/0:22:22,0:50:0,111,1109:..	0/0:27:27,0:50:0,120,1199:..	0/0:21:21,0:50:0,69,689:..	0/0:24:24,0:48:0,75,749:..	0/0:21:21,0:50:0,108,1079:..	0/0:16:16,0:48:0,63,629:..	0/0:23:23,0:48:0,69,689:..	0/0:25:25,0:50:0,81,809:..	0/0:21:21,0:48:0,78,779:..	0/0:25:25,0:50:0,105,1049:..	0/0:20:20,0:50:0,69,689:..	0/0:25:25,0:50:0,102,1019:..	0/0:20:20,0:50:0,69,689:..	0/0:24:24,0:50:0,78,779:..	0/0:17:17,0:50:0,96,959:..	0/0:24:24,0:48:0,78,779:..	0/0:22:22,0:48:0,66,659:..	0/0:25:25,0:50:0,87,869:..	0/0:23:23,0:48:0,69,689:..	0/0:21:21,0:48:0,72,719:..	0/0:34:34,0:50:0,123,1229:..	0/0:16:16,0:48:0,51,509:..	0/0:22:22,0:48:0,72,719:..	0/1:20:15,5:24:23,0,45:..	0/0:24:24,0:48:0,75,749:..	0/0:21:21,0:50:0,66,659:..	seq2
chr12	5792590	chr12_5792590_C_T	C	T	11	AF=0.013889;AQ=11	GT:DP:AD:GQ:PL:RNC	0/0:24:24,0:48:0,75,749:..	0/0:18:18,0:50:0,66,659:..	0/0:23:23,0:50:0,75,749:..	0/0:23:23,0:50:0,81,809:..	0/0:22:22,0:48:0,87,869:..	0/0:22:22,0:50:0,69,689:..	0/0:27:27,0:50:0,81,809:..	0/0:18:18,0:48:0,93,929:..	0/0:20:20,0:48:0,60,599:..	0/0:25:25,0:48:0,75,749:..	0/0:18:18,0:50:0,57,569:..	0/0:24:24,0:42:0,42,659:..	0/0:21:21,0:48:0,69,689:..	0/0:24:24,0:50:0,75,749:..	0/0:26:26,0:50:0,93,929:..	0/0:22:22,0:50:0,72,719:..	0/0:22:22,0:50:0,72,719:..	0/0:19:19,0:50:0,66,659:..	0/0:19:19,0:50:0,72,719:..	0/0:16:16,0:48:0,48,479:..	0/0:20:20,0:50:0,60,599:..	0/0:26:26,0:50:0,105,1049:..	0/0:23:23,0:48:0,75,749:..	0/0:26:26,0:50:0,126,1259:..	0/0:22:22,0:48:0,78,779:..	0/0:22:22,0:50:0,72,719:..	0/0:30:30,0:50:0,102,1019:..	0/0:26:26,0:48:0,75,989:..	0/0:22:22,0:48:0,69,689:..	0/0:16:16,0:48:0,54,539:..	0/0:25:25,0:50:0,99,989:..	0/0:20:20,0:50:0,66,659:..	0/0:25:25,0:48:0,75,749:..	0/0:23:23,0:48:0,87,869:..	0/0:17:17,0:50:0,57,569:..	0/1:28:23,5:12:11,0,40:..	seq2
chr12	5814101	chr12_5814101_C_T	C	T	45	AF=0.013889;AQ=45	GT:DP:AD:GQ:PL:RNC	0/0:28:28,0:50:0,93,929:..	0/0:21:21,0:50:0,78,779:..	0/0:24:24,0:48:0,90,899:..	0/0:16:16,0:48:0,72,719:..	0/0:27:27,0:50:0,105,1049:..	0/0:28:28,0:50:0,102,1019:..	0/0:20:20,0:50:0,75,749:..	0/0:18:18,0:50:0,57,569:..	0/0:18:18,0:50:0,78,779:..	0/0:20:20,0:50:0,72,719:..	0/0:32:32,0:50:0,114,1139:..	0/0:30:30,0:48:0,117,1169:..	0/0:27:27,0:50:0,96,959:..	0/0:27:27,0:50:0,117,1169:..	0/0:25:25,0:50:0,96,959:..	0/0:20:20,0:48:0,78,779:..	0/1:27:14,13:45:45,0,55:..	0/0:23:23,0:50:0,69,689:..	0/0:17:17,0:50:0,66,659:..	0/0:22:22,0:48:0,90,899:..	0/0:16:16,0:48:0,51,509:..	0/0:21:21,0:50:0,126,1259:..	0/0:21:21,0:48:0,102,1019:..	0/0:22:22,0:50:0,66,659:..	0/0:22:22,0:50:0,111,1109:..	0/0:21:21,0:48:0,75,749:..	0/0:27:27,0:50:0,102,1019:..	0/0:17:17,0:50:0,87,869:..	0/0:24:24,0:50:0,81,809:..	0/0:24:24,0:48:0,75,749:..	0/0:25:25,0:48:0,90,899:..	0/0:20:20,0:50:0,63,629:..	0/0:23:23,0:50:0,72,719:..	0/0:26:26,0:50:0,78,779:..	0/0:24:24,0:50:0,90,899:..	0/0:24:24,0:50:0,105,1049:..	seq2
chr12	6437226	chr12_6437226_G_A	G	A	41	AF=0.013889;AQ=41	GT:DP:AD:GQ:PL:RNC	0/0:23:23,0:48:0,75,749:..	0/0:22:22,0:50:0,66,659:..	0/0:25:25,0:48:0,96,959:..	0/0:16:16,0:48:0,48,479:..	0/0:17:17,0:50:0,60,599:..	0/0:21:21,0:48:0,63,629:..	0/0:20:20,0:50:0,63,629:..	0/0:12:12,0:36:0,36,359:..	0/0:18:18,0:50:0,60,599:..	0/0:18:18,0:50:0,96,959:..	0/0:19:19,0:48:0,81,809:..	0/0:21:21,0:48:0,102,1019:..	0/0:22:22,0:36:0,36,599:..	0/0:21:21,0:50:0,69,689:..	0/0:23:23,0:50:0,84,839:..	0/0:23:23,0:48:0,72,719:..	0/0:20:20,0:48:0,75,749:..	0/0:19:19,0:50:0,72,719:..	0/0:16:16,0:48:0,48,479:..	0/0:20:20,0:50:0,72,719:..	0/0:21:21,0:48:0,87,869:..	0/0:23:23,0:50:0,75,749:..	0/0:16:16,0:48:0,66,659:..	0/0:22:22,0:48:0,81,809:..	0/0:16:16,0:48:0,84,839:..	0/0:22:22,0:50:0,120,1199:..	0/1:22:9,13:41:41,0,52:..	0/0:17:17,0:50:0,54,539:..	0/0:15:15,0:45:0,45,449:..	0/0:23:23,0:50:0,78,779:..	0/0:18:18,0:50:0,111,1109:..	0/0:21:21,0:50:0,69,689:..	0/0:22:22,0:50:0,72,719:..	0/0:22:22,0:48:0,75,749:..	0/0:16:16,0:48:0,66,659:..	0/0:24:24,0:50:0,99,989:..	seq2
chr12	10084236	chr12_10084236_A_G	A	G	47	AF=0.013889;AQ=47	GT:DP:AD:GQ:PL:RNC	0/0:24:24,0:48:0,75,749:..	0/0:18:18,0:50:0,63,629:..	0/0:22:22,0:50:0,78,779:..	0/0:20:20,0:48:0,69,689:..	0/0:16:16,0:48:0,63,629:..	0/0:18:18,0:48:0,54,539:..	0/0:21:21,0:48:0,72,719:..	0/0:25:25,0:50:0,90,899:..	0/0:21:21,0:48:0,96,959:..	0/0:21:21,0:48:0,75,749:..	0/0:19:19,0:48:0,78,779:..	0/1:27:12,15:47:47,0,56:..	0/0:18:18,0:50:0,57,569:..	0/0:26:26,0:50:0,78,779:..	0/0:20:20,0:50:0,63,629:..	0/0:21:21,0:50:0,69,689:..	0/0:25:25,0:50:0,99,989:..	0/0:24:24,0:48:0,84,839:..	0/0:23:23,0:50:0,72,719:..	0/0:19:19,0:48:0,84,839:..	0/0:22:22,0:48:0,69,689:..	0/0:25:25,0:50:0,99,989:..	0/0:22:22,0:50:0,69,689:..	0/0:25:25,0:48:0,90,899:..	0/0:19:19,0:50:0,84,839:..	0/0:22:22,0:50:0,66,659:..	0/0:26:26,0:48:0,87,869:..	0/0:18:18,0:50:0,66,659:..	0/0:22:22,0:48:0,75,749:..	0/0:24:24,0:50:0,108,1079:..	0/0:29:29,0:50:0,96,959:..	0/0:23:23,0:50:0,96,959:..	0/0:26:26,0:50:0,84,839:..	0/0:23:23,0:50:0,87,869:..	0/0:17:17,0:50:0,57,569:..	0/0:23:23,0:50:0,75,749:..	seq2
chr12	21143534	chr12_21143534_C_A	C	A	32	AF=0.013889;AQ=32	GT:DP:AD:GQ:PL:RNC	0/0:17:17,0:21:0,21,449:..	0/0:15:15,0:15:0,15,389:..	0/0:24:24,0:12:0,12,599:..	0/0:21:21,0:50:0,63,629:..	0/0:22:22,0:50:0,66,659:..	0/0:12:12,0:36:0,36,359:..	0/0:23:23,0:48:0,78,779:..	0/0:16:14,0:10:0,0,0:II	0/0:12:12,0:36:0,36,359:..	0/0:25:25,0:45:0,45,689:..	0/0:20:20,0:50:0,60,599:..	0/0:19:19,0:50:0,57,569:..	0/1:24:9,13:31:32,0,35:..	0/0:11:11,0:33:0,33,329:..	0/0:26:26,0:50:0,87,869:..	0/0:17:17,0:50:0,54,539:..	0/0:24:24,0:50:0,75,749:..	0/0:16:16,0:18:0,18,419:..	0/0:29:29,0:50:0,57,809:..	0/0:21:21,0:33:0,33,569:..	0/0:30:30,0:50:0,60,839:..	0/0:30:30,0:50:0,66,899:..	0/0:21:21,0:50:0,63,629:..	0/0:26:26,0:50:0,57,809:..	0/0:13:13,0:9:0,9,329:..	0/0:18:18,0:50:0,60,599:..	0/0:17:17,0:50:0,51,509:..	0/0:23:23,0:50:0,69,689:..	0/0:20:20,0:50:0,72,719:..	0/0:12:12,0:36:0,36,359:..	0/0:19:19,0:50:0,57,569:..	0/0:14:14,0:42:0,42,419:..	0/0:12:12,0:36:0,36,359:..	0/0:22:22,0:50:0,69,689:..	0/0:23:23,0:50:0,51,749:..	0/0:17:17,0:50:0,54,539:..	seq2
chr12	26988977	chr12_26988977_G_A	G	A	23	AF=0.013889;AQ=23	GT:DP:AD:GQ:PL:RNC	0/0:16:16,0:48:0,48,479:..	0/0:16:16,0:48:0,54,539:..	0/0:20:20,0:50:0,60,599:..	0/0:24:24,0:50:0,72,719:..	0/0:16:16,0:48:0,81,809:..	0/0:22:22,0:48:0,72,719:..	0/0:24:24,0:50:0,72,719:..	0/0:20:20,0:50:0,60,599:..	0/0:19:19,0:50:0,60,599:..	0/0:23:23,0:50:0,90,899:..	0/0:24:24,0:50:0,75,749:..	0/0:24:24,0:48:0,75,749:..	0/0:17:17,0:50:0,51,509:..	0/0:19:19,0:50:0,57,569:..	0/1:31:23,8:23:23,0,47:..	0/0:21:21,0:50:0,75,749:..	0/0:27:27,0:50:0,120,1199:..	0/0:21:21,0:50:0,63,629:..	0/0:16:16,0:48:0,48,479:..	0/0:16:16,0:48:0,48,479:..	0/0:26:26,0:50:0,81,809:..	0/0:27:27,0:50:0,87,869:..	0/0:22:22,0:50:0,72,719:..	0/0:16:16,0:48:0,48,479:..	0/0:21:21,0:33:0,33,569:..	0/0:23:23,0:50:0,75,749:..	0/0:21:21,0:50:0,63,629:..	0/0:20:20,0:48:0,66,659:..	0/0:23:23,0:50:0,78,779:..	0/0:21:21,0:48:0,75,749:..	0/0:19:19,0:50:0,63,629:..	0/0:23:23,0:48:0,48,719:..	0/0:22:22,0:48:0,69,689:..	0/0:16:16,0:48:0,54,539:..	0/0:24:24,0:48:0,105,1049:..	0/0:23:23,0:50:0,81,809:..	seq2
chr12	33513986	chr12_33513986_A_G	A	G	46	AF=0.013889;AQ=46	GT:DP:AD:GQ:PL:RNC	0/0:17:17,0:50:0,54,539:..	0/0:22:22,0:50:0,72,719:..	0/0:23:23,0:50:0,72,719:..	0/0:25:25,0:50:0,75,749:..	0/0:24:24,0:50:0,75,749:..	0/0:17:17,0:50:0,57,569:..	0/0:23:23,0:48:0,69,689:..	0/0:21:21,0:50:0,63,629:..	0/0:20:20,0:50:0,60,599:..	0/0:23:23,0:50:0,69,689:..	0/0:20:20,0:50:0,72,719:..	0/0:22:22,0:48:0,66,659:..	0/0:30:30,0:50:0,90,899:..	0/0:19:19,0:50:0,72,719:..	0/0:23:23,0:48:0,75,749:..	0/0:20:20,0:50:0,63,629:..	0/1:19:7,12:46:46,0,53:..	0/0:27:27,0:50:0,99,989:..	0/0:20:20,0:50:0,66,659:..	0/0:23:23,0:50:0,78,779:..	0/0:17:17,0:50:0,54,539:..	0/0:23:23,0:50:0,93,929:..	0/0:31:31,0:50:0,93,929:..	0/0:25:25,0:50:0,75,749:..	0/0:24:24,0:48:0,72,719:..	0/0:24:24,0:50:0,72,719:..	0/0:21:21,0:50:0,72,719:..	0/0:23:23,0:50:0,69,689:..	0/0:29:29,0:50:0,96,959:..	0/0:24:24,0:50:0,75,749:..	0/0:20:20,0:48:0,60,599:..	0/0:25:25,0:50:0,75,749:..	0/0:24:24,0:50:0,78,779:..	0/0:16:16,0:48:0,48,479:..	0/0:16:16,0:48:0,48,479:..	0/0:19:19,0:50:0,60,599:..	seq2
chr12	36163158	chr12_36163158_C_T	C	T	40	AF=0.013889;AQ=40	GT:DP:AD:GQ:PL:RNC	0/0:24:24,0:48:0,99,989:..	0/0:19:19,0:50:0,60,599:..	0/0:21:21,0:50:0,81,809:..	0/0:24:24,0:48:0,87,869:..	0/0:25:25,0:48:0,84,839:..	0/0:18:18,0:50:0,54,539:..	0/0:16:16,0:48:0,84,839:..	0/0:16:16,0:48:0,48,479:..	0/0:21:21,0:48:0,84,839:..	0/0:23:23,0:50:0,102,1019:..	0/0:20:20,0:50:0,75,749:..	0/0:24:24,0:50:0,78,779:..	0/0:17:17,0:50:0,60,599:..	0/0:21:21,0:50:0,114,1139:..	0/0:21:21,0:50:0,96,959:..	0/0:17:17,0:50:0,69,689:..	0/0:24:24,0:48:0,75,749:..	0/0:25:25,0:48:0,84,839:..	0/0:19:19,0:50:0,57,569:..	0/0:20:20,0:48:0,66,659:..	0/0:19:19,0:50:0,102,1019:..	0/0:20:20,0:50:0,105,1049:..	0/0:14:14,0:42:0,42,419:..	0/0:20:20,0:48:0,120,1199:..	0/0:24:24,0:48:0,96,959:..	0/0:28:28,0:50:0,90,899:..	0/0:21:21,0:50:0,87,869:..	0/0:16:16,0:48:0,48,479:..	0/0:23:23,0:50:0,75,749:..	0/0:22:22,0:50:0,90,899:..	0/0:24:24,0:50:0,102,1019:..	0/0:18:18,0:50:0,90,899:..	0/0:23:23,0:50:0,69,689:..	0/0:21:21,0:48:0,105,1049:..	0/0:17:17,0:50:0,123,1229:..	0/1:23:11,12:40:40,0,52:..	seq2
chr12	49665327	chr12_49665327_T_C	T	C	20	AF=0.013889;AQ=20	GT:DP:AD:GQ:PL:RNC	0/0:20:20,0:50:0,63,629:..	0/0:21:21,0:50:0,72,719:..	0/0:20:20,0:50:0,63,629:..	0/0:20:20,0:50:0,75,749:..	0/0:16:16,0:48:0,57,569:..	0/0:20:20,0:50:0,69,689:..	0/0:13:13,0:39:0,39,389:..	0/0:14:14,0:42:0,45,449:..	0/1:19:12,7:21:20,0,40:..	0/0:16:16,0:48:0,60,599:..	0/0:16:16,0:48:0,54,539:..	0/0:22:22,0:50:0,72,719:..	0/0:14:14,0:42:0,45,449:..	0/0:14:14,0:42:0,45,449:..	0/0:19:19,0:50:0,72,719:..	0/0:24:24,0:42:0,42,659:..	0/0:24:24,0:50:0,72,719:..	0/0:16:16,0:48:0,48,479:..	0/0:22:22,0:50:0,72,719:..	0/0:25:25,0:50:0,84,839:..	0/0:18:18,0:50:0,54,539:..	0/0:28:28,0:50:0,117,1169:..	0/0:19:19,0:48:0,114,1139:..	0/0:22:22,0:50:0,66,659:..	0/0:13:13,0:39:0,39,389:..	0/0:22:22,0:48:0,93,929:..	0/0:24:24,0:48:0,75,749:..	0/0:27:27,0:48:0,99,989:..	0/0:23:23,0:48:0,96,959:..	0/0:20:20,0:50:0,66,659:..	0/0:16:16,0:48:0,48,479:..	0/0:23:23,0:50:0,69,689:..	0/0:19:19,0:50:0,57,569:..	0/0:23:23,0:50:0,72,719:..	0/0:23:23,0:50:0,72,719:..	0/0:18:18,0:50:0,57,569:..	seq2
chr12	57395746	chr12_57395746_C_G	C	G	42	AF=0.013889;AQ=42	GT:DP:AD:GQ:PL:RNC	0/0:20:20,0:50:0,72,719:..	0/0:23:23,0:48:0,75,749:..	0/0:23:23,0:48:0,78,779:..	0/0:23:23,0:50:0,72,719:..	0/0:26:26,0:50:0,87,869:..	0/0:22:22,0:50:0,72,719:..	0/0:16:16,0:48:0,60,599:..	0/1:14:3,11:29:42,0,29:..	0/0:21:21,0:48:0,81,809:..	0/0:22:22,0:50:0,72,719:..	0/0:16:16,0:48:0,48,479:..	0/0:20:20,0:48:0,72,719:..	0/0:14:14,0:42:0,45,449:..	0/0:23:23,0:50:0,96,959:..	0/0:24:24,0:48:0,75,749:..	0/0:20:20,0:48:0,75,749:..	0/0:17:17,0:50:0,69,689:..	0/0:22:22,0:50:0,69,689:..	0/0:18:18,0:48:0,63,629:..	0/0:21:21,0:48:0,66,659:..	0/0:18:18,0:48:0,57,569:..	0/0:23:23,0:50:0,72,719:..	0/0:20:20,0:48:0,66,659:..	0/0:24:24,0:50:0,75,749:..	0/0:19:19,0:50:0,63,629:..	0/0:17:17,0:48:0,72,719:..	0/0:24:24,0:50:0,99,989:..	0/0:26:26,0:48:0,90,899:..	0/0:16:16,0:48:0,48,479:..	0/0:19:19,0:50:0,60,599:..	0/0:22:22,0:48:0,66,659:..	0/0:22:22,0:48:0,84,839:..	0/0:25:25,0:50:0,78,779:..	0/0:16:16,0:48:0,72,719:..	0/0:16:16,0:48:0,63,629:..	0/0:19:19,0:48:0,63,629:..	seq2
chr12	69349621	chr12_69349621_G_A	G	A	27	AF=0.013889;AQ=27	GT:DP:AD:GQ:PL:RNC	0/0:17:17,0:50:0,57,569:..	0/0:25:25,0:48:0,75,749:..	0/0:26:26,0:50:0,78,779:..	0/0:16:16,0:48:0,69,689:..	0/0:23:23,0:48:0,87,869:..	0/0:23:23,0:48:0,69,689:..	0/0:20:20,0:50:0,66,659:..	0/0:16:16,0:48:0,48,479:..	0/0:16:16,0:48:0,48,479:..	0/0:18:18,0:50:0,57,569:..	0/0:16:16,0:48:0,69,689:..	0/0:23:23,0:50:0,75,749:..	0/0:17:17,0:50:0,60,599:..	0/0:26:26,0:48:0,135,1349:..	0/0:24:24,0:50:0,72,719:..	0/0:24:24,0:50:0,75,749:..	0/0:22:22,0:50:0,75,749:..	0/0:16:16,0:48:0,48,479:..	0/0:21:21,0:50:0,66,659:..	0/0:26:26,0:50:0,123,1229:..	0/0:18:18,0:50:0,63,629:..	0/0:25:25,0:50:0,120,1199:..	0/0:24:24,0:48:0,72,719:..	0/0:25:25,0:50:0,78,779:..	0/0:21:21,0:48:0,69,689:..	0/0:24:24,0:50:0,72,719:..	0/0:24:24,0:50:0,87,869:..	0/0:22:22,0:50:0,66,659:..	0/0:27:27,0:50:0,81,809:..	0/0:19:19,0:50:0,69,689:..	0/0:28:28,0:50:0,102,1019:..	0/0:18:18,0:50:0,66,659:..	0/0:16:16,0:48:0,48,479:..	0/0:26:26,0:48:0,81,809:..	0/1:21:13,8:27:27,0,43:..	0/0:29:29,0:50:0,99,989:..	seq2
chr12	69551368	chr12_69551368_C_T	C	T	45	AF=0.013889;AQ=45	GT:DP:AD:GQ:PL:RNC	0/0:22:22,0:48:0,72,719:..	0/0:20:20,0:50:0,87,869:..	0/0:26:26,0:48:0,84,839:..	0/0:24:24,0:50:0,90,899:..	0/0:23:23,0:50:0,72,719:..	0/0:22:22,0:48:0,66,659:..	0/0:23:23,0:50:0,111,1109:..	0/0:16:16,0:48:0,75,749:..	0/0:22:22,0:48:0,66,659:..	0/0:24:24,0:50:0,69,929:..	0/0:24:24,0:50:0,72,719:..	0/0:26:26,0:50:0,132,1319:..	0/0:24:24,0:50:0,72,719:..	0/0:26:26,0:50:0,111,1109:..	0/0:34:34,0:50:0,120,1199:..	0/0:23:23,0:48:0,75,749:..	0/0:27:27,0:50:0,111,1109:..	0/0:23:23,0:48:0,81,809:..	0/0:20:20,0:50:0,60,599:..	0/0:21:21,0:50:0,114,1139:..	0/0:24:24,0:50:0,93,929:..	0/0:32:32,0:50:0,105,1049:..	0/0:28:28,0:50:0,102,1019:..	0/0:21:21,0:50:0,81,809:..	0/0:17:17,0:50:0,51,509:..	0/1:34:13,21:44:45,0,48:..	0/0:26:26,0:50:0,96,959:..	0/0:23:23,0:48:0,90,899:..	0/0:24:24,0:48:0,72,719:..	0/0:23:23,0:50:0,69,689:..	0/0:23:23,0:50:0,96,959:..	0/0:23:23,0:50:0,99,989:..	0/0:20:20,0:50:0,81,809:..	0/0:18:18,0:50:0,66,659:..	0/0:23:23,0:48:0,48,719:..	0/0:25:25,0:45:0,45,689:..	seq2
chr12	70930822	chr12_70930822_C_T	C	T	44	AF=0.013889;AQ=44	GT:DP:AD:GQ:PL:RNC	0/0:21:21,0:50:0,63,629:..	0/0:25:25,0:48:0,78,779:..	0/0:25:25,0:50:0,75,749:..	0/0:25:25,0:48:0,96,959:..	0/0:26:26,0:50:0,96,959:..	0/0:21:21,0:48:0,69,689:..	0/0:23:23,0:50:0,69,689:..	0/0:25:25,0:50:0,75,749:..	0/0:22:22,0:50:0,69,689:..	0/0:23:23,0:48:0,90,899:..	0/0:24:24,0:50:0,72,719:..	0/0:20:20,0:48:0,69,689:..	0/0:19:19,0:48:0,72,719:..	0/0:22:22,0:50:0,69,689:..	0/0:22:22,0:50:0,69,689:..	0/0:20:20,0:48:0,72,719:..	0/0:28:28,0:50:0,102,1019:..	0/0:16:16,0:48:0,48,479:..	0/0:22:22,0:50:0,72,719:..	0/0:20:20,0:50:0,66,659:..	0/0:22:22,0:48:0,75,749:..	0/0:25:25,0:48:0,75,749:..	0/0:18:18,0:50:0,66,659:..	0/0:25:25,0:48:0,90,899:..	0/0:19:19,0:50:0,63,629:..	0/0:21:21,0:50:0,63,629:..	0/0:27:27,0:50:0,102,1019:..	0/0:18:18,0:48:0,66,659:..	0/0:28:28,0:50:0,87,869:..	0/0:21:21,0:48:0,63,629:..	0/0:25:25,0:48:0,75,749:..	0/0:23:23,0:48:0,72,719:..	0/0:22:22,0:48:0,108,1079:..	0/0:20:20,0:50:0,66,659:..	0/1:24:8,16:44:44,0,54:..	0/0:21:21,0:50:0,78,779:..	seq2
chr12	72835572	chr12_72835572_C_T	C	T	40	AF=0.013889;AQ=40	GT:DP:AD:GQ:PL:RNC	0/0:20:20,0:30:0,30,539:..	0/0:22:22,0:50:0,57,809:..	0/0:23:23,0:50:0,75,749:..	0/0:22:22,0:48:0,69,689:..	0/0:23:23,0:50:0,87,869:..	0/0:22:22,0:50:0,105,1049:..	0/0:22:22,0:50:0,81,809:..	0/0:17:17,0:50:0,72,719:..	0/0:20:20,0:48:0,69,689:..	0/0:24:24,0:48:0,93,929:..	0/1:40:24,16:41:40,0,56:..	0/0:24:24,0:48:0,111,1109:..	0/0:18:18,0:50:0,66,659:..	0/0:26:26,0:48:0,120,1199:..	0/0:24:24,0:48:0,111,1109:..	0/0:21:21,0:50:0,66,659:..	0/0:20:20,0:50:0,60,599:..	0/0:16:16,0:48:0,63,629:..	0/0:22:22,0:50:0,75,749:..	0/0:21:21,0:50:0,78,779:..	0/0:21:21,0:50:0,90,899:..	0/0:23:23,0:48:0,123,1229:..	0/0:19:19,0:48:0,63,629:..	0/0:27:27,0:50:0,108,1079:..	0/0:22:22,0:50:0,66,659:..	0/0:20:20,0:50:0,72,719:..	0/0:25:25,0:50:0,111,1109:..	0/0:21:21,0:48:0,72,719:..	0/0:19:19,0:50:0,84,839:..	0/0:20:20,0:50:0,96,959:..	0/0:19:19,0:48:0,90,899:..	0/0:18:18,0:50:0,63,629:..	0/0:26:26,0:50:0,78,779:..	0/0:22:22,0:50:0,69,689:..	0/0:19:19,0:50:0,60,599:..	0/0:19:19,0:48:0,78,779:..	seq2
chr12	79704901	chr12_79704901_C_A	C	A	14	AF=0.013889;AQ=14	GT:DP:AD:GQ:PL:RNC	0/0:19:19,0:50:0,60,599:..	0/0:20:20,0:50:0,63,629:..	0/0:21:21,0:48:0,75,749:..	0/0:22:22,0:50:0,72,719:..	0/0:21:21,0:48:0,63,629:..	0/0:23:23,0:50:0,75,749:..	0/0:26:26,0:50:0,96,959:..	0/0:26:26,0:50:0,90,899:..	0/0:23:23,0:50:0,75,749:..	0/0:20:20,0:50:0,69,689:..	0/0:20:20,0:50:0,69,689:..	0/0:23:23,0:50:0,75,749:..	0/0:21:21,0:48:0,75,749:..	0/0:22:22,0:50:0,69,689:..	0/0:22:22,0:48:0,75,749:..	0/0:25:25,0:48:0,75,749:..	0/0:24:24,0:42:0,42,659:..	0/0:23:23,0:50:0,75,749:..	0/0:20:20,0:50:0,63,629:..	0/0:16:16,0:48:0,48,479:..	0/0:21:21,0:50:0,90,899:..	0/0:23:23,0:48:0,75,749:..	0/1:33:26,7:15:14,0,41:..	0/0:22:22,0:48:0,72,719:..	0/0:27:27,0:50:0,96,959:..	0/0:19:19,0:50:0,105,1049:..	0/0:30:30,0:30:0,30,779:..	0/0:19:19,0:48:0,69,689:..	0/0:25:25,0:48:0,87,869:..	0/0:16:16,0:48:0,48,479:..	0/0:20:20,0:48:0,69,689:..	0/0:19:19,0:50:0,75,749:..	0/0:22:22,0:50:0,75,749:..	0/0:24:24,0:48:0,75,749:..	0/0:22:22,0:50:0,66,659:..	0/0:20:20,0:50:0,60,599:..	seq2
chr12	87740881	chr12_87740881_A_T	A	T	49	AF=0.013889;AQ=49	GT:DP:AD:GQ:PL:RNC	0/0:20:20,0:48:0,81,809:..	0/0:17:17,0:50:0,51,509:..	0/0:21:21,0:48:0,78,779:..	0/0:24:24,0:50:0,75,749:..	0/0:24:24,0:48:0,48,719:..	0/0:23:23,0:50:0,111,1109:..	0/0:16:16,0:48:0,72,719:..	0/0:19:19,0:50:0,57,569:..	0/0:16:16,0:48:0,48,479:..	0/0:24:24,0:50:0,75,749:..	0/0:23:23,0:50:0,72,719:..	0/0:20:20,0:48:0,60,599:..	0/0:23:23,0:50:0,69,689:..	0/0:21:21,0:48:0,111,1109:..	0/0:18:18,0:50:0,60,599:..	0/0:24:24,0:50:0,75,749:..	0/0:28:28,0:48:0,75,989:..	0/0:25:25,0:48:0,87,869:..	0/0:19:19,0:50:0,75,749:..	0/0:17:17,0:48:0,63,629:..	0/0:14:14,0:42:0,42,419:..	0/0:22:22,0:48:0,99,989:..	0/0:22:22,0:50:0,72,719:..	0/0:24:24,0:48:0,72,719:..	0/0:17:17,0:48:0,57,569:..	0/0:24:24,0:50:0,72,719:..	0/0:23:23,0:48:0,69,689:..	0/0:22:22,0:48:0,66,659:..	0/0:25:25,0:50:0,75,749:..	0/0:19:19,0:50:0,60,599:..	0/0:19:19,0:50:0,69,689:..	0/0:16:16,0:48:0,48,479:..	0/0:21:21,0:50:0,72,719:..	0/0:16:16,0:48:0,72,719:..	0/0:24:24,0:48:0,72,719:..	0/1:35:12,22:47:49,0,51:..	seq2
chr12	87957285	chr12_87957285_C_T	C	T	32	AF=0.013889;AQ=32	GT:DP:AD:GQ:PL:RNC	0/0:17:17,0:50:0,54,539:..	0/0:24:24,0:48:0,75,749:..	0/0:22:22,0:50:0,72,719:..	0/0:19:19,0:50:0,90,899:..	0/0:21:21,0:50:0,75,749:..	0/0:17:17,0:48:0,102,1019:..	0/0:17:17,0:50:0,66,659:..	0/0:23:23,0:48:0,72,719:..	0/0:21:21,0:50:0,75,749:..	0/0:23:23,0:48:0,72,719:..	0/0:23:23,0:48:0,78,779:..	0/0:21:21,0:50:0,75,749:..	0/0:22:22,0:50:0,75,749:..	0/0:16:16,0:48:0,48,479:..	0/0:22:22,0:50:0,90,899:..	0/0:18:18,0:50:0,54,539:..	0/0:22:22,0:50:0,69,689:..	0/0:16:16,0:48:0,75,749:..	0/0:16:16,0:48:0,69,689:..	0/0:19:19,0:50:0,75,749:..	0/0:16:16,0:48:0,99,989:..	0/0:22:22,0:50:0,105,1049:..	0/0:23:23,0:50:0,75,749:..	0/0:25:25,0:50:0,111,1109:..	0/0:21:21,0:48:0,72,719:..	0/0:18:18,0:50:0,96,959:..	0/0:17:17,0:50:0,60,599:..	0/0:23:23,0:50:0,69,689:..	0/1:21:9,12:30:32,0,33:..	0/0:18:18,0:50:0,69,689:..	0/0:22:22,0:48:0,78,779:..	0/0:23:23,0:50:0,69,689:..	0/0:21:21,0:48:0,63,629:..	0/0:19:19,0:48:0,66,659:..	0/0:14:14,0:42:0,45,449:..	0/0:22:22,0:48:0,123,1229:..	seq2
chr12	88437222	chr12_88437222_G_A	G	A	12	AF=0.013889;AQ=12	GT:DP:AD:GQ:PL:RNC	0/0:23:23,0:39:0,39,629:..	0/0:26:26,0:50:0,90,899:..	0/0:12:12,0:36:0,39,389:..	0/0:21:21,0:33:0,33,569:..	0/0:22:22,0:36:0,36,599:..	0/0:24:24,0:48:0,96,959:..	0/0:21:21,0:50:0,66,659:..	0/0:22:22,0:36:0,36,599:..	0/0:16:16,0:48:0,60,599:..	0/0:25:25,0:50:0,75,749:..	0/0:9:9,0:27:0,27,269:..	0/0:22:22,0:50:0,93,929:..	0/0:16:16,0:18:0,18,419:..	0/0:17:17,0:50:0,57,569:..	0/0:32:32,0:36:0,36,839:..	0/0:25:25,0:48:0,78,779:..	0/0:24:24,0:50:0,75,749:..	0/0:16:16,0:48:0,72,719:..	0/0:23:23,0:39:0,39,629:..	0/0:24:24,0:48:0,75,749:..	0/0:18:18,0:50:0,57,569:..	0/0:25:25,0:50:0,117,1169:..	0/0:19:19,0:50:0,57,569:..	0/0:30:30,0:48:0,114,1139:..	0/0:23:23,0:50:0,81,809:..	0/0:15:15,0:45:0,45,449:..	0/0:16:16,0:48:0,57,569:..	0/1:12:10,2:12:12,0,40:..	0/0:24:24,0:50:0,87,869:..	0/0:23:23,0:50:0,84,839:..	0/0:22:22,0:48:0,99,989:..	0/0:20:20,0:50:0,60,599:..	0/0:18:18,0:50:0,54,539:..	0/0:18:18,0:50:0,54,539:..	0/0:16:16,0:48:0,72,719:..	0/0:25:25,0:50:0,75,749:..	seq2
chr12	89185465	chr12_89185465_G_A	G	A	34	AF=0.013889;AQ=34	GT:DP:AD:GQ:PL:RNC	0/0:25:25,0:50:0,75,749:..	0/0:16:16,0:48:0,48,479:..	0/0:21:21,0:50:0,63,629:..	0/0:18:18,0:50:0,66,659:..	0/0:22:22,0:50:0,75,749:..	0/0:16:16,0:48:0,48,479:..	0/0:16:16,0:48:0,66,659:..	0/0:15:15,0:45:0,45,449:..	0/0:20:20,0:50:0,60,599:..	0/0:21:21,0:48:0,96,959:..	0/0:16:16,0:48:0,75,749:..	0/0:14:14,0:42:0,42,419:..	0/0:22:22,0:50:0,66,659:..	0/0:17:17,0:50:0,54,539:..	0/0:26:26,0:50:0,81,809:..	0/0:22:22,0:50:0,75,749:..	0/0:20:20,0:50:0,72,719:..	0/0:24:24,0:48:0,81,809:..	0/0:20:20,0:50:0,72,719:..	0/0:22:22,0:48:0,93,929:..	0/0:21:21,0:48:0,69,689:..	0/0:22:22,0:50:0,69,689:..	0/0:20:20,0:50:0,72,719:..	0/0:29:29,0:50:0,129,1289:..	0/0:24:24,0:50:0,75,749:..	0/0:16:16,0:48:0,48,479:..	0/0:27:27,0:50:0,108,1079:..	0/0:18:18,0:50:0,75,749:..	0/0:22:22,0:48:0,66,659:..	0/0:15:15,0:45:0,45,449:..	0/0:19:19,0:48:0,63,629:..	0/0:24:24,0:50:0,72,719:..	0/1:23:14,9:34:34,0,53:..	0/0:23:23,0:48:0,72,719:..	0/0:18:18,0:50:0,60,599:..	0/0:12:12,0:36:0,36,359:..	seq2
chr12	90742281	chr12_90742281_C_T	C	T	42	AF=0.013889;AQ=42	GT:DP:AD:GQ:PL:RNC	0/0:17:17,0:50:0,87,869:..	0/0:18:18,0:50:0,75,749:..	0/0:21:21,0:50:0,66,659:..	0/0:23:23,0:50:0,75,749:..	0/0:24:24,0:50:0,72,719:..	0/0:24:24,0:50:0,75,749:..	0/0:19:19,0:50:0,60,599:..	0/0:17:17,0:50:0,63,629:..	0/0:21:21,0:48:0,78,779:..	0/1:25:12,13:42:42,0,50:..	0/0:24:24,0:48:0,75,749:..	0/0:25:25,0:48:0,75,749:..	0/0:18:18,0:48:0,66,659:..	0/0:24:24,0:50:0,78,779:..	0/0:20:20,0:50:0,102,1019:..	0/0:26:26,0:50:0,90,899:..	0/0:22:22,0:48:0,69,689:..	0/0:24:24,0:48:0,72,719:..	0/0:16:16,0:48:0,75,749:..	0/0:18:18,0:50:0,60,599:..	0/0:22:22,0:50:0,87,869:..	0/0:26:26,0:50:0,78,779:..	0/0:24:24,0:48:0,78,779:..	0/0:24:24,0:50:0,90,899:..	0/0:21:21,0:50:0,75,749:..	0/0:23:23,0:48:0,72,719:..	0/0:26:26,0:48:0,117,1169:..	0/0:18:18,0:50:0,57,569:..	0/0:24:24,0:50:0,87,869:..	0/0:19:19,0:50:0,75,749:..	0/0:24:24,0:50:0,75,749:..	0/0:17:17,0:50:0,60,599:..	0/0:14:14,0:42:0,45,449:..	0/0:20:20,0:50:0,60,599:..	0/0:16:16,0:48:0,60,599:..	0/0:17:17,0:50:0,51,509:..	seq2
chr12	92788308	chr12_92788308_G_T	G	T	28	AF=0.013889;AQ=28	GT:DP:AD:GQ:PL:RNC	0/0:17:17,0:48:0,66,659:..	0/0:20:20,0:50:0,63,629:..	0/0:18:18,0:50:0,63,629:..	0/0:22:22,0:48:0,75,749:..	0/0:20:20,0:48:0,102,1019:..	0/0:25:25,0:50:0,75,749:..	0/0:18:18,0:50:0,63,629:..	0/0:16:16,0:48:0,48,479:..	0/0:23:23,0:48:0,81,809:..	0/0:22:22,0:48:0,69,689:..	0/0:16:16,0:48:0,102,1019:..	0/0:21:21,0:48:0,78,779:..	0/0:18:18,0:50:0,54,539:..	0/0:23:23,0:50:0,96,959:..	0/0:22:22,0:50:0,66,659:..	0/0:16:16,0:48:0,54,539:..	0/0:24:24,0:50:0,81,809:..	0/0:23:23,0:50:0,72,719:..	0/0:19:19,0:50:0,60,599:..	0/0:23:23,0:50:0,72,719:..	0/0:19:19,0:50:0,60,599:..	0/0:18:18,0:50:0,72,719:..	0/0:19:19,0:50:0,72,719:..	0/0:21:21,0:48:0,72,719:..	0/0:21:21,0:50:0,63,629:..	0/0:27:27,0:50:0,108,1079:..	0/0:23:23,0:48:0,69,689:..	0/1:13:9,4:29:28,0,51:..	0/0:24:24,0:50:0,72,719:..	0/0:19:19,0:50:0,75,749:..	0/0:21:21,0:50:0,87,869:..	0/0:14:14,0:42:0,45,449:..	0/0:21:21,0:50:0,66,659:..	0/0:24:24,0:50:0,72,719:..	0/0:16:16,0:48:0,48,479:..	0/0:20:20,0:50:0,75,749:..	seq2
chr12	93486862	chr12_93486862_A_G	A	G	34	AF=0.013889;AQ=34	GT:DP:AD:GQ:PL:RNC	0/0:23:23,0:48:0,72,719:..	0/0:14:14,0:42:0,42,419:..	0/0:22:22,0:48:0,75,749:..	0/0:20:20,0:50:0,72,719:..	0/0:18:18,0:50:0,66,659:..	0/0:23:23,0:50:0,75,749:..	0/0:25:25,0:48:0,90,899:..	0/0:23:23,0:50:0,69,689:..	0/0:22:22,0:50:0,75,749:..	0/0:16:16,0:48:0,102,1019:..	0/0:25:25,0:48:0,93,929:..	0/0:16:16,0:48:0,72,719:..	0/0:17:17,0:50:0,60,599:..	0/0:16:16,0:48:0,57,569:..	0/0:22:22,0:50:0,72,719:..	0/0:18:18,0:48:0,75,749:..	0/0:22:22,0:48:0,72,719:..	0/0:17:17,0:50:0,60,599:..	0/0:18:18,0:50:0,69,689:..	0/0:21:21,0:50:0,66,659:..	0/0:21:21,0:50:0,63,629:..	0/1:34:21,13:34:34,0,49:..	0/0:22:22,0:50:0,69,689:..	0/0:23:23,0:50:0,69,689:..	0/0:20:20,0:50:0,66,659:..	0/0:21:21,0:50:0,69,689:..	0/0:22:22,0:48:0,66,659:..	0/0:20:20,0:48:0,66,659:..	0/0:25:25,0:50:0,75,749:..	0/0:21:21,0:48:0,69,689:..	0/0:16:16,0:48:0,72,719:..	0/0:14:14,0:42:0,45,449:..	0/0:25:25,0:50:0,75,749:..	0/0:25:25,0:50:0,75,749:..	0/0:23:23,0:50:0,81,809:..	0/0:24:24,0:50:0,99,989:..	seq2
chr12	95074694	chr12_95074694_G_A	G	A	34	AF=0.013889;AQ=34	GT:DP:AD:GQ:PL:RNC	0/0:18:18,0:50:0,66,659:..	0/0:20:20,0:50:0,87,869:..	0/0:23:23,0:48:0,69,689:..	0/0:16:16,0:48:0,48,479:..	0/0:23:23,0:50:0,69,689:..	0/0:19:19,0:48:0,75,749:..	0/0:20:20,0:50:0,72,719:..	0/0:7:7,0:21:0,24,239:..	0/0:19:19,0:50:0,60,599:..	0/0:23:23,0:50:0,75,749:..	0/0:20:20,0:50:0,66,659:..	0/0:18:18,0:50:0,57,569:..	0/0:18:18,0:50:0,63,629:..	0/0:17:17,0:50:0,54,539:..	0/0:19:19,0:50:0,66,659:..	0/0:16:16,0:48:0,57,569:..	0/0:25:25,0:50:0,78,779:..	0/0:22:22,0:48:0,69,689:..	0/0:21:21,0:50:0,63,629:..	0/0:19:19,0:50:0,57,569:..	0/0:20:20,0:50:0,66,659:..	0/0:21:21,0:50:0,69,689:..	0/0:20:20,0:50:0,60,599:..	0/0:25:25,0:50:0,75,749:..	0/0:23:23,0:50:0,84,839:..	0/0:18:18,0:50:0,84,839:..	0/0:25:25,0:48:0,81,809:..	0/0:11:11,0:33:0,33,329:..	0/0:21:21,0:48:0,66,659:..	0/0:27:27,0:50:0,84,839:..	0/0:16:16,0:48:0,72,719:..	0/0:18:18,0:50:0,54,539:..	0/0:21:21,0:50:0,63,629:..	0/0:19:19,0:48:0,57,569:..	0/0:16:16,0:48:0,57,569:..	0/1:31:20,11:35:34,0,55:..	seq2
chr12	95675661	chr12_95675661_C_T	C	T	10	AF=0.013889;AQ=10	GT:DP:AD:GQ:PL:RNC	0/0:22:22,0:50:0,66,659:..	0/0:11:11,0:33:0,33,329:..	0/0:17:17,0:50:0,69,689:..	0/0:24:24,0:48:0,72,719:..	0/0:21:21,0:50:0,84,839:..	0/0:29:29,0:50:0,102,1019:..	0/0:22:22,0:50:0,72,719:..	0/0:16:16,0:48:0,60,599:..	0/0:23:23,0:48:0,72,719:..	0/1:40:31,8:11:10,0,40:..	0/0:20:20,0:50:0,72,719:..	0/0:24:24,0:48:0,75,749:..	0/0:21:21,0:50:0,72,719:..	0/0:28:28,0:50:0,99,989:..	0/0:23:23,0:48:0,72,719:..	0/0:19:19,0:50:0,57,569:..	0/0:22:22,0:50:0,66,659:..	0/0:14:14,0:42:0,42,419:..	0/0:21:21,0:48:0,87,869:..	0/0:26:26,0:48:0,99,989:..	0/0:21:21,0:50:0,90,899:..	0/0:28:28,0:48:0,105,1049:..	0/0:23:23,0:50:0,69,689:..	0/0:22:22,0:50:0,66,659:..	0/0:21:21,0:50:0,66,659:..	0/0:21:21,0:50:0,75,749:..	0/0:23:23,0:50:0,99,989:..	0/0:25:25,0:48:0,75,749:..	0/0:19:19,0:48:0,75,749:..	0/0:25:25,0:50:0,78,779:..	0/0:25:25,0:50:0,135,1349:..	0/0:19:19,0:50:0,69,689:..	0/0:18:18,0:50:0,75,749:..	0/0:21:21,0:48:0,117,1169:..	0/0:25:25,0:48:0,75,749:..	0/0:21:21,0:48:0,99,989:..	seq2
chr12	99129680	chr12_99129680_A_G	A	G	49	AF=0.013889;AQ=49	GT:DP:AD:GQ:PL:RNC	0/0:24:24,0:42:0,42,659:..	0/0:20:20,0:50:0,69,689:..	0/0:25:25,0:50:0,87,869:..	0/0:23:23,0:50:0,75,749:..	0/0:22:22,0:48:0,78,779:..	0/0:23:23,0:50:0,69,689:..	0/0:23:23,0:48:0,72,719:..	0/0:20:20,0:48:0,108,1079:..	0/0:19:19,0:48:0,69,689:..	0/0:22:22,0:48:0,66,659:..	0/0:20:20,0:48:0,63,629:..	0/0:21:21,0:50:0,69,689:..	0/1:35:16,19:48:49,0,53:..	0/0:23:23,0:48:0,72,719:..	0/0:24:24,0:48:0,141,1409:..	0/0:20:20,0:48:0,78,779:..	0/0:22:22,0:48:0,78,779:..	0/0:23:23,0:48:0,78,779:..	0/0:28:28,0:50:0,102,1019:..	0/0:17:17,0:50:0,54,539:..	0/0:24:24,0:48:0,75,749:..	0/0:28:28,0:50:0,96,959:..	0/0:18:18,0:50:0,57,569:..	0/0:21:21,0:50:0,66,659:..	0/0:22:22,0:50:0,69,689:..	0/0:23:23,0:48:0,75,749:..	0/0:26:26,0:50:0,69,929:..	0/0:16:16,0:48:0,87,869:..	0/0:25:25,0:48:0,75,749:..	0/0:23:23,0:48:0,48,719:..	0/0:24:24,0:50:0,75,749:..	0/0:17:17,0:50:0,60,599:..	0/0:18:18,0:50:0,69,689:..	0/0:19:19,0:50:0,63,629:..	0/0:18:18,0:50:0,63,629:..	0/0:21:21,0:48:0,105,1049:..	seq2
chr12	100930164	chr12_100930164_C_T	C	T	28	AF=0.013889;AQ=28	GT:DP:AD:GQ:PL:RNC	0/0:19:19,0:50:0,57,569:..	0/0:31:31,0:50:0,93,929:..	0/0:28:28,0:50:0,84,839:..	0/0:32:32,0:50:0,129,1289:..	0/0:22:22,0:50:0,75,989:..	0/0:22:22,0:50:0,90,899:..	0/0:25:25,0:48:0,93,929:..	0/0:18:18,0:24:0,24,479:..	0/0:22:22,0:36:0,36,599:..	0/0:24:24,0:48:0,147,1469:..	0/0:23:23,0:39:0,39,629:..	0/0:21:21,0:50:0,63,629:..	0/0:20:20,0:50:0,66,659:..	0/0:21:21,0:50:0,90,899:..	0/1:29:20,9:28:28,0,49:..	0/0:29:29,0:27:0,27,749:..	0/0:16:16,0:48:0,81,809:..	0/0:29:29,0:27:0,27,749:..	0/0:25:25,0:48:0,87,869:..	0/0:21:21,0:50:0,66,659:..	0/0:26:26,0:50:0,111,1109:..	0/0:28:28,0:48:0,75,989:..	0/0:20:20,0:50:0,93,929:..	0/0:28:28,0:48:0,132,1319:..	0/0:23:23,0:50:0,84,839:..	0/0:24:24,0:48:0,105,1049:..	0/0:25:25,0:50:0,78,779:..	0/0:19:19,0:48:0,81,809:..	0/0:17:17,0:50:0,51,509:..	0/0:23:23,0:50:0,84,839:..	0/0:32:32,0:50:0,129,1289:..	0/0:21:21,0:48:0,90,899:..	0/0:22:22,0:50:0,81,809:..	0/0:25:25,0:50:0,93,929:..	0/0:25:25,0:50:0,102,1019:..	0/0:21:21,0:50:0,117,1169:..	seq2
[truncated: 152 more rows]
